# Supplementary material for: The Transcriptome of Trichuris suis – First Molecular Insights into a Parasite with Curative Properties for Key Immune Diseases of Humans
Source: PubMed Central journal article supplement (PMC3160910; doi:10.1371/journal.pone.0023590), 2011-08-24
Supplement: pone.0023590.s001.pdf [file pone.0023590.s001.pdf]

# KEGG pathways for *Trichuris suis*

March 24, 2011

## List of Figures

|    |                                                                |    |
|----|----------------------------------------------------------------|----|
| 1  | ko01110 Biosynthesis of secondary metabolites . . . . .        | 2  |
| 2  | ko05200 Pathways in cancer . . . . .                           | 3  |
| 3  | ko01120 Microbial metabolism in diverse environments . . . . . | 4  |
| 4  | ko05016 Huntington's disease . . . . .                         | 5  |
| 5  | ko00190 Oxidative phosphorylation . . . . .                    | 6  |
| 6  | ko03010 Ribosome . . . . .                                     | 7  |
| 7  | ko05010 Alzheimer's disease . . . . .                          | 8  |
| 8  | ko05012 Parkinson's disease . . . . .                          | 9  |
| 9  | ko04010 MAPK signaling pathway . . . . .                       | 10 |
| 10 | ko00230 Purine metabolism . . . . .                            | 11 |
| 11 | ko04141 Protein processing in endoplasmic reticulum . . . . .  | 12 |
| 12 | ko04110 Cell cycle . . . . .                                   | 13 |
| 13 | ko00240 Pyrimidine metabolism . . . . .                        | 14 |
| 14 | ko04810 Regulation of actin cytoskeleton . . . . .             | 15 |
| 15 | ko04120 Ubiquitin mediated proteolysis . . . . .               | 16 |
| 16 | ko04310 Wnt signaling pathway . . . . .                        | 17 |
| 17 | ko04910 Insulin signaling pathway . . . . .                    | 18 |
| 18 | ko04510 Focal adhesion . . . . .                               | 19 |
| 19 | ko04111 Cell cycle - yeast . . . . .                           | 20 |

|    |                                                                    |    |
|----|--------------------------------------------------------------------|----|
| 20 | ko04530 Tight junction                                             | 21 |
| 21 | ko03013 RNA transport                                              | 22 |
| 22 | ko04114 Oocyte meiosis                                             | 23 |
| 23 | ko04145 Phagosome                                                  | 24 |
| 24 | ko04722 Neurotrophin signaling pathway                             | 25 |
| 25 | ko04914 Progesterone-mediated oocyte maturation                    | 26 |
| 26 | ko03050 Proteasome                                                 | 27 |
| 27 | ko04113 Meiosis - yeast                                            | 28 |
| 28 | ko04916 Melanogenesis                                              | 29 |
| 29 | ko04520 Adherens junction                                          | 30 |
| 30 | ko04062 Chemokine signaling pathway                                | 31 |
| 31 | ko04144 Endocytosis                                                | 32 |
| 32 | ko04020 Calcium signaling pathway                                  | 33 |
| 33 | ko05211 Renal cell carcinoma                                       | 34 |
| 34 | ko04360 Axon guidance                                              | 35 |
| 35 | ko04670 Leukocyte transendothelial migration                       | 36 |
| 36 | ko00510 N-Glycan biosynthesis                                      | 37 |
| 37 | ko04666 Fc gamma R-mediated phagocytosis                           | 38 |
| 38 | ko05215 Prostate cancer                                            | 39 |
| 39 | ko04012 ErbB signaling pathway                                     | 40 |
| 40 | ko05210 Colorectal cancer                                          | 41 |
| 41 | ko04080 Neuroactive ligand-receptor interaction                    | 42 |
| 42 | ko04660 T cell receptor signaling pathway                          | 43 |
| 43 | ko05100 Bacterial invasion of epithelial cells                     | 44 |
| 44 | ko04350 TGF-beta signaling pathway                                 | 45 |
| 45 | ko05160 Hepatitis C                                                | 46 |
| 46 | ko04150 mTOR signaling pathway                                     | 47 |
| 47 | ko05120 Epithelial cell signaling in Helicobacter pylori infection | 48 |
| 48 | ko05212 Pancreatic cancer                                          | 49 |
| 49 | ko00010 Glycolysis / Gluconeogenesis                               | 50 |
| 50 | ko03030 DNA replication                                            | 51 |

|    |                                                               |    |
|----|---------------------------------------------------------------|----|
| 51 | ko04070 Phosphatidylinositol signaling system . . . . .       | 52 |
| 52 | ko00970 Aminoacyl-tRNA biosynthesis . . . . .                 | 53 |
| 53 | ko05110 Vibrio cholerae infection . . . . .                   | 54 |
| 54 | ko05220 Chronic myeloid leukemia . . . . .                    | 55 |
| 55 | ko00520 Amino sugar and nucleotide sugar metabolism . . . . . | 56 |
| 56 | ko00280 Valine, leucine and isoleucine degradation . . . . .  | 57 |
| 57 | ko04912 GnRH signaling pathway . . . . .                      | 58 |
| 58 | ko05131 Shigellosis . . . . .                                 | 59 |
| 59 | ko04142 Lysosome . . . . .                                    | 60 |
| 60 | ko00020 Citrate cycle (TCA cycle) . . . . .                   | 61 |
| 61 | ko05213 Endometrial cancer . . . . .                          | 62 |
| 62 | ko03020 RNA polymerase . . . . .                              | 63 |
| 63 | ko05145 Toxoplasmosis . . . . .                               | 64 |
| 64 | ko04340 Hedgehog signaling pathway . . . . .                  | 65 |
| 65 | ko04270 Vascular smooth muscle contraction . . . . .          | 66 |
| 66 | ko04920 Adipocytokine signaling pathway . . . . .             | 67 |
| 67 | ko05142 Chagas disease (American trypanosomiasis) . . . . .   | 68 |
| 68 | ko03420 Nucleotide excision repair . . . . .                  | 69 |
| 69 | ko05223 Non-small cell lung cancer . . . . .                  | 70 |
| 70 | ko00562 Inositol phosphate metabolism . . . . .               | 71 |
| 71 | ko05130 Pathogenic Escherichia coli infection . . . . .       | 72 |
| 72 | ko05217 Basal cell carcinoma . . . . .                        | 73 |
| 73 | ko00500 Starch and sucrose metabolism . . . . .               | 74 |
| 74 | ko03022 Basal transcription factors . . . . .                 | 75 |
| 75 | ko04260 Cardiac muscle contraction . . . . .                  | 76 |
| 76 | ko05214 Glioma . . . . .                                      | 77 |
| 77 | ko05146 Amoebiasis . . . . .                                  | 78 |
| 78 | ko04380 Osteoclast differentiation . . . . .                  | 79 |
| 79 | ko05222 Small cell lung cancer . . . . .                      | 80 |
| 80 | ko04972 Pancreatic secretion . . . . .                        | 81 |
| 81 | ko00620 Pyruvate metabolism . . . . .                         | 82 |

|     |                                                               |     |
|-----|---------------------------------------------------------------|-----|
| 82  | ko00564 Glycerophospholipid metabolism                        | 83  |
| 83  | ko04664 Fc epsilon RI signaling pathway                       | 84  |
| 84  | ko04330 Notch signaling pathway                               | 85  |
| 85  | ko04370 VEGF signaling pathway                                | 86  |
| 86  | ko04662 B cell receptor signaling pathway                     | 87  |
| 87  | ko04720 Long-term potentiation                                | 88  |
| 88  | ko04974 Protein digestion and absorption                      | 89  |
| 89  | ko00640 Propanoate metabolism                                 | 90  |
| 90  | ko04540 Gap junction                                          | 91  |
| 91  | ko04730 Long-term depression                                  | 92  |
| 92  | ko00250 Alanine, aspartate and glutamate metabolism           | 93  |
| 93  | ko04962 Vasopressin-regulated water reabsorption              | 94  |
| 94  | ko00030 Pentose phosphate pathway                             | 95  |
| 95  | ko00513 Various types of N-glycan biosynthesis                | 96  |
| 96  | ko00380 Tryptophan metabolism                                 | 97  |
| 97  | ko04612 Antigen processing and presentation                   | 98  |
| 98  | ko00480 Glutathione metabolism                                | 99  |
| 99  | ko00650 Butanoate metabolism                                  | 100 |
| 100 | ko03320 PPAR signaling pathway                                | 101 |
| 101 | ko05323 Rheumatoid arthritis                                  | 102 |
| 102 | ko02010 ABC transporters                                      | 103 |
| 103 | ko00051 Fructose and mannose metabolism                       | 104 |
| 104 | ko04630 Jak-STAT signaling pathway                            | 105 |
| 105 | ko05221 Acute myeloid leukemia                                | 106 |
| 106 | ko04976 Bile secretion                                        | 107 |
| 107 | ko03060 Protein export                                        | 108 |
| 108 | ko04650 Natural killer cell mediated cytotoxicity             | 109 |
| 109 | ko04115 p53 signaling pathway                                 | 110 |
| 110 | ko00563 Glycosylphosphatidylinositol(GPI)-anchor biosynthesis | 111 |
| 111 | ko00071 Fatty acid metabolism                                 | 112 |
| 112 | ko00330 Arginine and proline metabolism                       | 113 |

|     |                                                                |     |
|-----|----------------------------------------------------------------|-----|
| 113 | ko00680 Methane metabolism                                     | 114 |
| 114 | ko05410 Hypertrophic cardiomyopathy (HCM)                      | 115 |
| 115 | ko04620 Toll-like receptor signaling pathway                   | 116 |
| 116 | ko05218 Melanoma                                               | 117 |
| 117 | ko04130 SNARE interactions in vesicular transport              | 118 |
| 118 | ko03410 Base excision repair                                   | 119 |
| 119 | ko04971 Gastric acid secretion                                 | 120 |
| 120 | ko00710 Carbon fixation in photosynthetic organisms            | 121 |
| 121 | ko05412 Arrhythmogenic right ventricular cardiomyopathy (ARVC) | 122 |
| 122 | ko00270 Cysteine and methionine metabolism                     | 123 |
| 123 | ko04210 Apoptosis                                              | 124 |
| 124 | ko03008 Ribosome biogenesis in eukaryotes                      | 125 |
| 125 | ko00627 Aminobenzoate degradation                              | 126 |
| 126 | ko00350 Tyrosine metabolism                                    | 127 |
| 127 | ko04320 Dorso-ventral axis formation                           | 128 |
| 128 | ko05414 Dilated cardiomyopathy                                 | 129 |
| 129 | ko05014 Amyotrophic lateral sclerosis (ALS)                    | 130 |
| 130 | ko03430 Mismatch repair                                        | 131 |
| 131 | ko00052 Galactose metabolism                                   | 132 |
| 132 | ko04140 Regulation of autophagy                                | 133 |
| 133 | ko04930 Type II diabetes mellitus                              | 134 |
| 134 | ko05216 Thyroid cancer                                         | 135 |
| 135 | ko04512 ECM-receptor interaction                               | 136 |
| 136 | ko04970 Salivary secretion                                     | 137 |
| 137 | ko00720 Carbon fixation pathways in prokaryotes                | 138 |
| 138 | ko00260 Glycine, serine and threonine metabolism               | 139 |
| 139 | ko03018 RNA degradation                                        | 140 |
| 140 | ko00670 One carbon pool by folate                              | 141 |
| 141 | ko00534 Glycosaminoglycan biosynthesis - heparan sulfate       | 142 |
| 142 | ko05416 Viral myocarditis                                      | 143 |
| 143 | ko05219 Bladder cancer                                         | 144 |

|     |                                                      |     |
|-----|------------------------------------------------------|-----|
| 144 | ko00910 Nitrogen metabolism                          | 145 |
| 145 | ko00561 Glycerolipid metabolism                      | 146 |
| 146 | ko04966 Collecting duct acid secretion               | 147 |
| 147 | ko04745 Phototransduction - fly                      | 148 |
| 148 | ko04960 Aldosterone-regulated sodium reabsorption    | 149 |
| 149 | ko04973 Carbohydrate digestion and absorption        | 150 |
| 150 | ko03015 mRNA surveillance pathway                    | 151 |
| 151 | ko00040 Pentose and glucuronate interconversions     | 152 |
| 152 | ko00310 Lysine degradation                           | 153 |
| 153 | ko04013 MAPK signaling pathway - fly                 | 154 |
| 154 | ko00983 Drug metabolism - other enzymes              | 155 |
| 155 | ko03440 Homologous recombination                     | 156 |
| 156 | ko00600 Sphingolipid metabolism                      | 157 |
| 157 | ko05020 Prion diseases                               | 158 |
| 158 | ko04514 Cell adhesion molecules (CAMs)               | 159 |
| 159 | ko04710 Circadian rhythm - mammal                    | 160 |
| 160 | ko04060 Cytokine-cytokine receptor interaction       | 161 |
| 161 | ko00630 Glyoxylate and dicarboxylate metabolism      | 162 |
| 162 | ko00410 beta-Alanine metabolism                      | 163 |
| 163 | ko00790 Folate biosynthesis                          | 164 |
| 164 | ko00514 Other types of O-glycan biosynthesis         | 165 |
| 165 | ko04610 Complement and coagulation cascades          | 166 |
| 166 | ko00360 Phenylalanine metabolism                     | 167 |
| 167 | ko04011 MAPK signaling pathway - yeast               | 168 |
| 168 | ko00900 Terpenoid backbone biosynthesis              | 169 |
| 169 | ko04622 RIG-I-like receptor signaling pathway        | 170 |
| 170 | ko00290 Valine, leucine and isoleucine biosynthesis  | 171 |
| 171 | ko00860 Porphyrin and chlorophyll metabolism         | 172 |
| 172 | ko04626 Plant-pathogen interaction                   | 173 |
| 173 | ko00980 Metabolism of xenobiotics by cytochrome P450 | 174 |
| 174 | ko00760 Nicotinate and nicotinamide metabolism       | 175 |

|     |                                                             |     |
|-----|-------------------------------------------------------------|-----|
| 175 | ko00450 Selenocompound metabolism                           | 176 |
| 176 | ko04623 Cytosolic DNA-sensing pathway                       | 177 |
| 177 | ko00362 Benzoate degradation                                | 178 |
| 178 | ko00062 Fatty acid elongation in mitochondria               | 179 |
| 179 | ko00903 Limonene and pinene degradation                     | 180 |
| 180 | ko04146 Peroxisome                                          | 181 |
| 181 | ko04621 NOD-like receptor signaling pathway                 | 182 |
| 182 | ko00982 Drug metabolism - cytochrome P450                   | 183 |
| 183 | ko02020 Two-component system                                | 184 |
| 184 | ko00130 Ubiquinone and other terpenoid-quinone biosynthesis | 185 |
| 185 | ko00565 Ether lipid metabolism                              | 186 |
| 186 | ko04740 Olfactory transduction                              | 187 |
| 187 | ko05143 African trypanosomiasis                             | 188 |
| 188 | ko03040 Spliceosome                                         | 189 |
| 189 | ko05140 Leishmaniasis                                       | 190 |
| 190 | ko04964 Proximal tubule bicarbonate reclamation             | 191 |
| 191 | ko04614 Renin-angiotensin system                            | 192 |
| 192 | ko03450 Non-homologous end-joining                          | 193 |
| 193 | ko03070 Bacterial secretion system                          | 194 |
| 194 | ko00521 Streptomycin biosynthesis                           | 195 |
| 195 | ko04940 Type I diabetes mellitus                            | 196 |
| 196 | ko00830 Retinol metabolism                                  | 197 |
| 197 | ko04950 Maturity onset diabetes of the young                | 198 |
| 198 | ko01040 Biosynthesis of unsaturated fatty acids             | 199 |
| 199 | ko00460 Cyanoamino acid metabolism                          | 200 |
| 200 | ko00625 Chloroalkane and chloroalkene degradation           | 201 |
| 201 | ko00363 Bisphenol degradation                               | 202 |
| 202 | ko00950 Isoquinoline alkaloid biosynthesis                  | 203 |
| 203 | ko04122 Sulfur relay system                                 | 204 |
| 204 | ko00590 Arachidonic acid metabolism                         | 205 |
| 205 | ko00511 Other glycan degradation                            | 206 |

|     |         |                                                            |     |
|-----|---------|------------------------------------------------------------|-----|
| 206 | ko00072 | Synthesis and degradation of ketone bodies                 | 207 |
| 207 | ko00340 | Histidine metabolism                                       | 208 |
| 208 | ko00532 | Glycosaminoglycan biosynthesis - chondroitin sulfate       | 209 |
| 209 | ko00930 | Caprolactam degradation                                    | 210 |
| 210 | ko00281 | Geraniol degradation                                       | 211 |
| 211 | ko04640 | Hematopoietic cell lineage                                 | 212 |
| 212 | ko00960 | Tropane, piperidine and pyridine alkaloid biosynthesis     | 213 |
| 213 | ko00740 | Riboflavin metabolism                                      | 214 |
| 214 | ko00626 | Naphthalene degradation                                    | 215 |
| 215 | ko00920 | Sulfur metabolism                                          | 216 |
| 216 | ko00053 | Ascorbate and aldarate metabolism                          | 217 |
| 217 | ko00140 | Steroid hormone biosynthesis                               | 218 |
| 218 | ko00624 | Polycyclic aromatic hydrocarbon degradation                | 219 |
| 219 | ko00061 | Fatty acid biosynthesis                                    | 220 |
| 220 | ko05322 | Systemic lupus erythematosus                               | 221 |
| 221 | ko04975 | Fat digestion and absorption                               | 222 |
| 222 | ko04742 | Taste transduction                                         | 223 |
| 223 | ko00750 | Vitamin B6 metabolism                                      | 224 |
| 224 | ko00601 | Glycosphingolipid biosynthesis - lacto and neolacto series | 225 |
| 225 | ko00430 | Taurine and hypotaurine metabolism                         | 226 |
| 226 | ko04711 | Circadian rhythm - fly                                     | 227 |
| 227 | ko00785 | Lipoic acid metabolism                                     | 228 |
| 228 | ko00603 | Glycosphingolipid biosynthesis - globo series              | 229 |
| 229 | ko00643 | Styrene degradation                                        | 230 |
| 230 | ko04712 | Circadian rhythm - plant                                   | 231 |
| 231 | ko05340 | Primary immunodeficiency                                   | 232 |
| 232 | ko00440 | Phosphonate and phosphinate metabolism                     | 233 |
| 233 | ko00730 | Thiamine metabolism                                        | 234 |
| 234 | ko00780 | Biotin metabolism                                          | 235 |
| 235 | ko00591 | Linoleic acid metabolism                                   | 236 |
| 236 | ko00400 | Phenylalanine, tyrosine and tryptophan biosynthesis        | 237 |



|     |         |                                                       |     |
|-----|---------|-------------------------------------------------------|-----|
| 237 | ko00965 | Betalain biosynthesis                                 | 238 |
| 238 | ko00940 | Phenylpropanoid biosynthesis                          | 239 |
| 239 | ko00512 | Mucin type O-Glycan biosynthesis                      | 240 |
| 240 | ko05150 | Staphylococcus aureus infection                       | 241 |
| 241 | ko05144 | Malaria                                               | 242 |
| 242 | ko00770 | Pantothenate and CoA biosynthesis                     | 243 |
| 243 | ko00471 | D-Glutamine and D-glutamate metabolism                | 244 |
| 244 | ko00604 | Glycosphingolipid biosynthesis - ganglio series       | 245 |
| 245 | ko00901 | Indole alkaloid biosynthesis                          | 246 |
| 246 | ko00945 | Stilbenoid, diarylheptanoid and gingerol biosynthesis | 247 |
| 247 | ko01055 | Biosynthesis of vancomycin group antibiotics          | 248 |
| 248 | ko04112 | Cell cycle - Caulobacter                              | 249 |
| 249 | ko04744 | Phototransduction                                     | 250 |
| 250 | ko00533 | Glycosaminoglycan biosynthesis - keratan sulfate      | 251 |
| 251 | ko00642 | Ethylbenzene degradation                              | 252 |
| 252 | ko00100 | Steroid biosynthesis                                  | 253 |
| 253 | ko01051 | Biosynthesis of ansamycins                            | 254 |
| 254 | ko00660 | C5-Branched dibasic acid metabolism                   | 255 |
| 255 | ko00524 | Butirosin and neomycin biosynthesis                   | 256 |
| 256 | ko00944 | Flavone and flavonol biosynthesis                     | 257 |
| 257 | ko00592 | alpha-Linolenic acid metabolism                       | 258 |
| 258 | ko00401 | Novobiocin biosynthesis                               | 259 |
| 259 | ko00531 | Glycosaminoglycan degradation                         | 260 |
| 260 | ko00908 | Zeatin biosynthesis                                   | 261 |
| 261 | ko00523 | Polyketide sugar unit biosynthesis                    | 262 |
| 262 | ko04977 | Vitamin digestion and absorption                      | 263 |

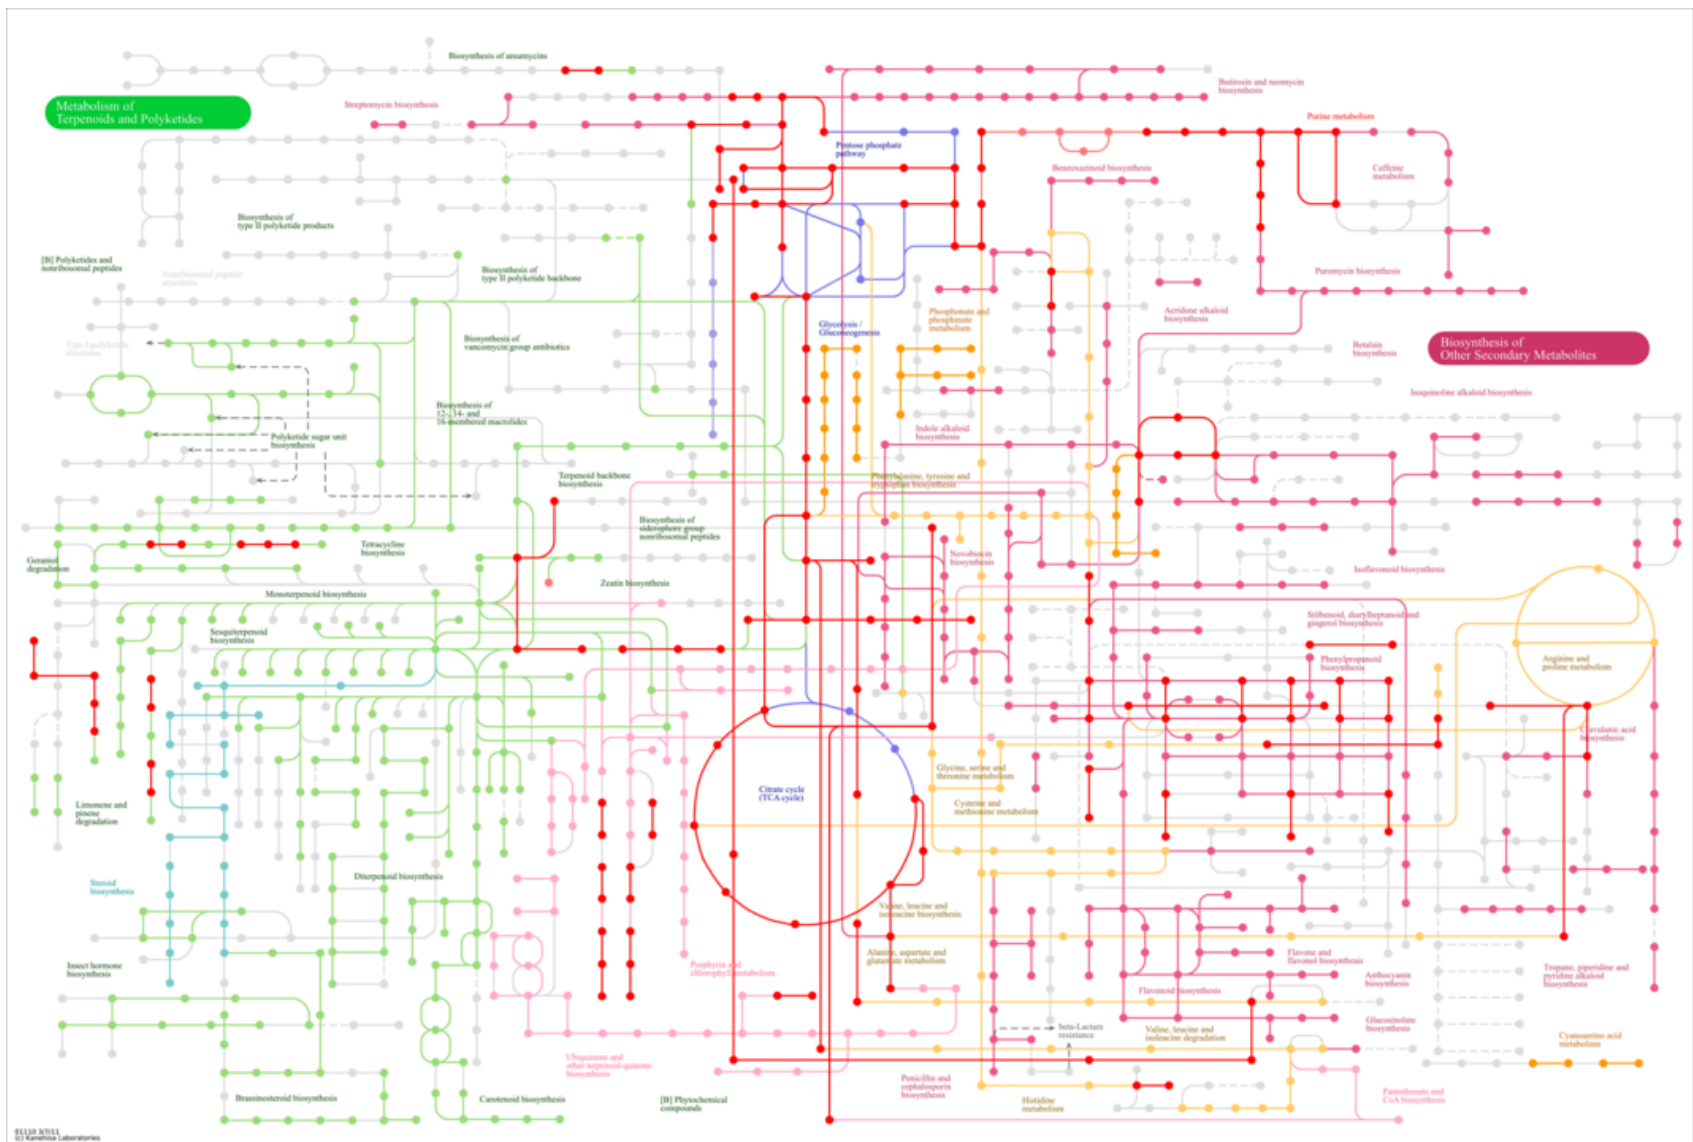

Figure 1: ko01110 Biosynthesis of secondary metabolites

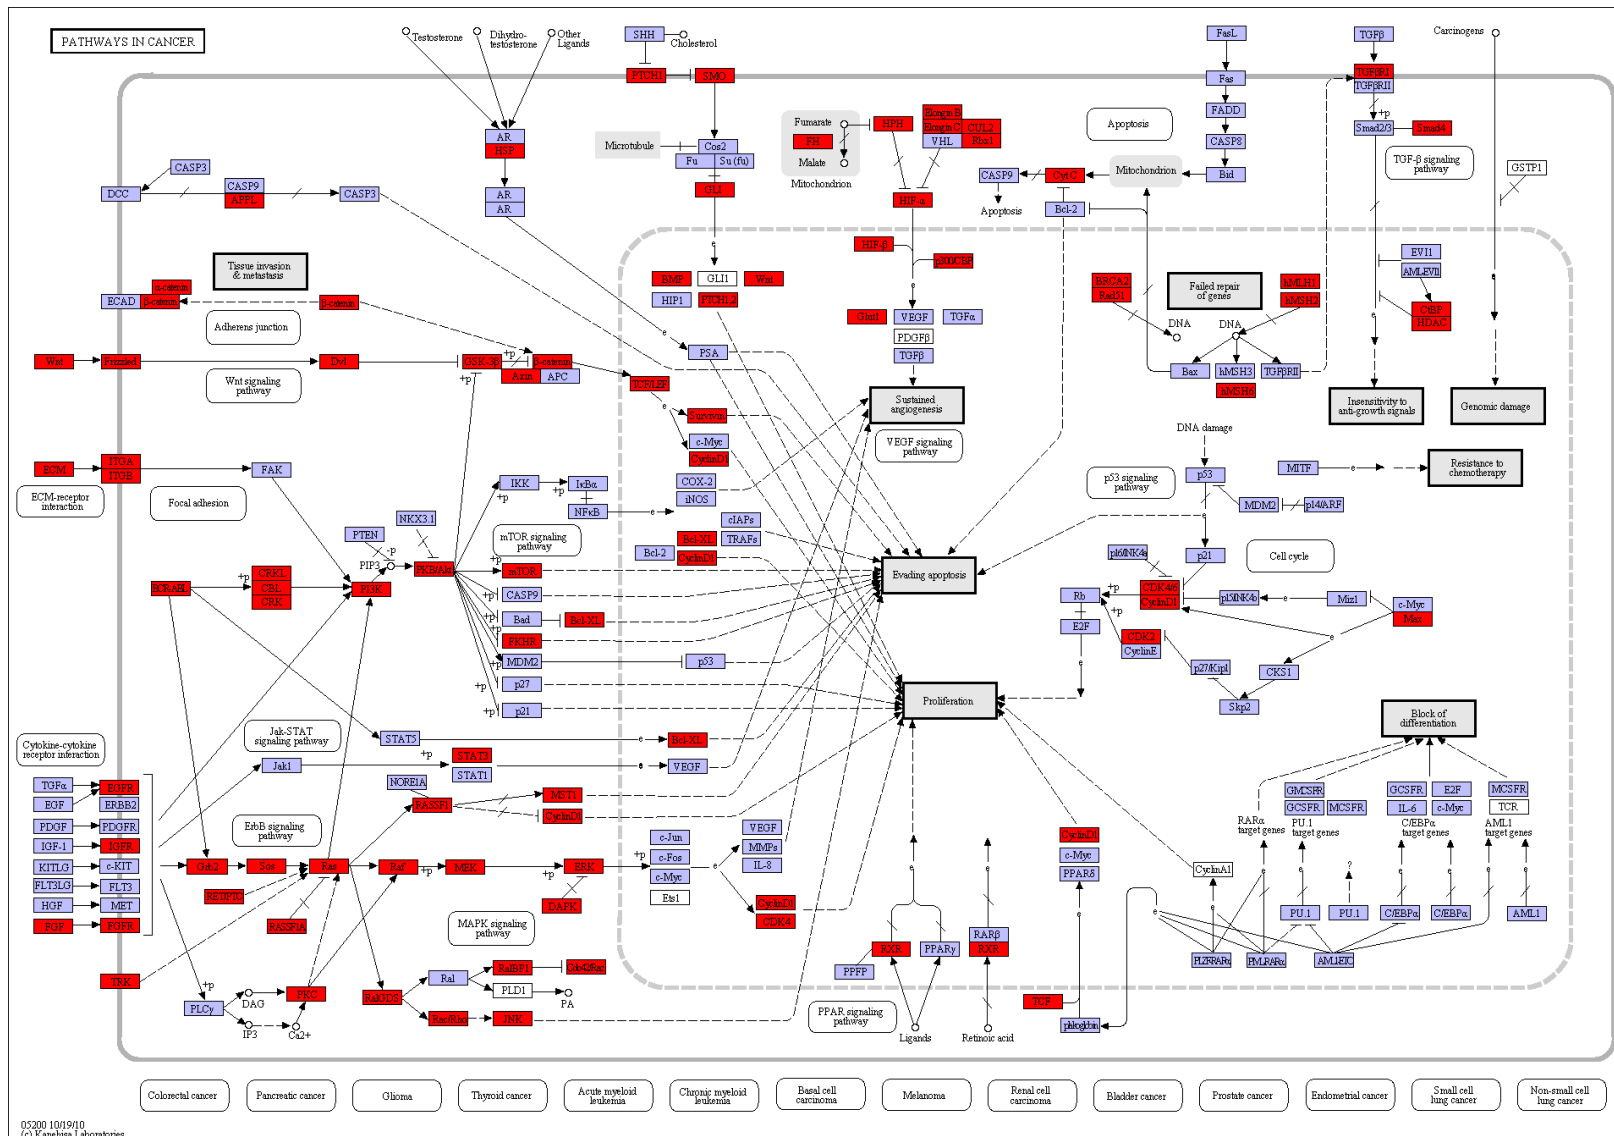

Figure 2: ko05200 Pathways in cancer

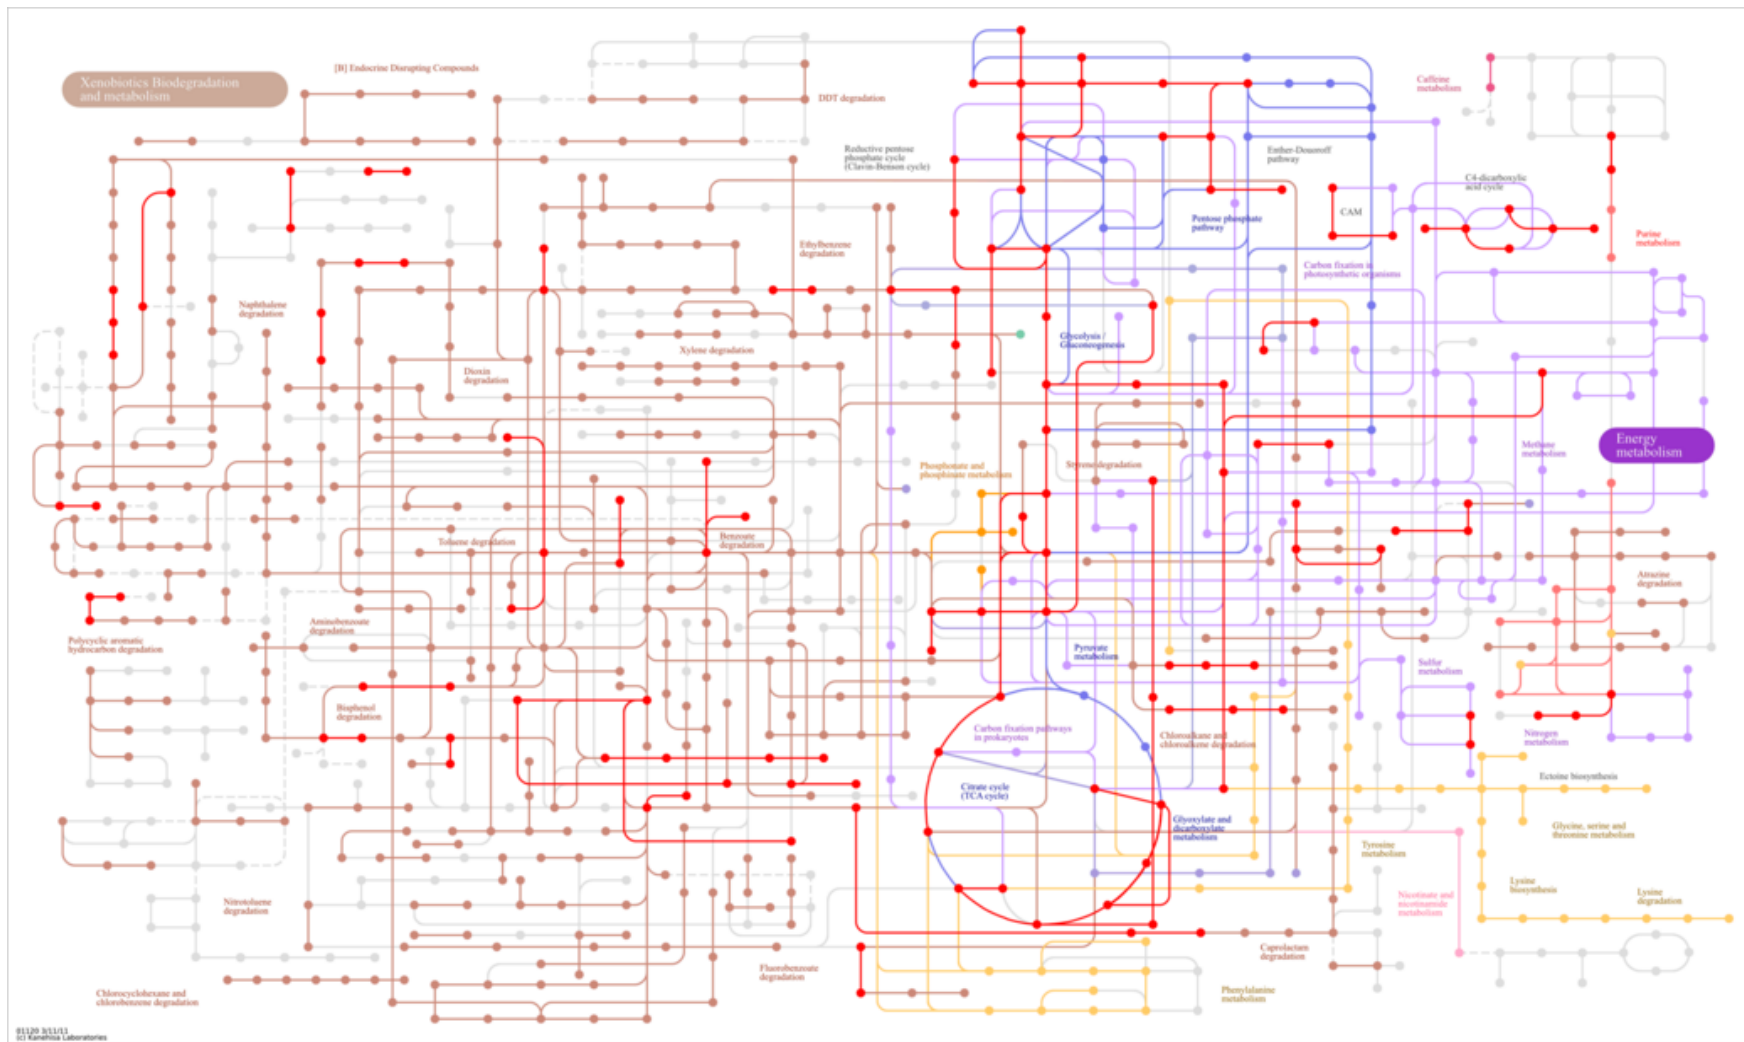

Figure 3: ko01120 Microbial metabolism in diverse environments

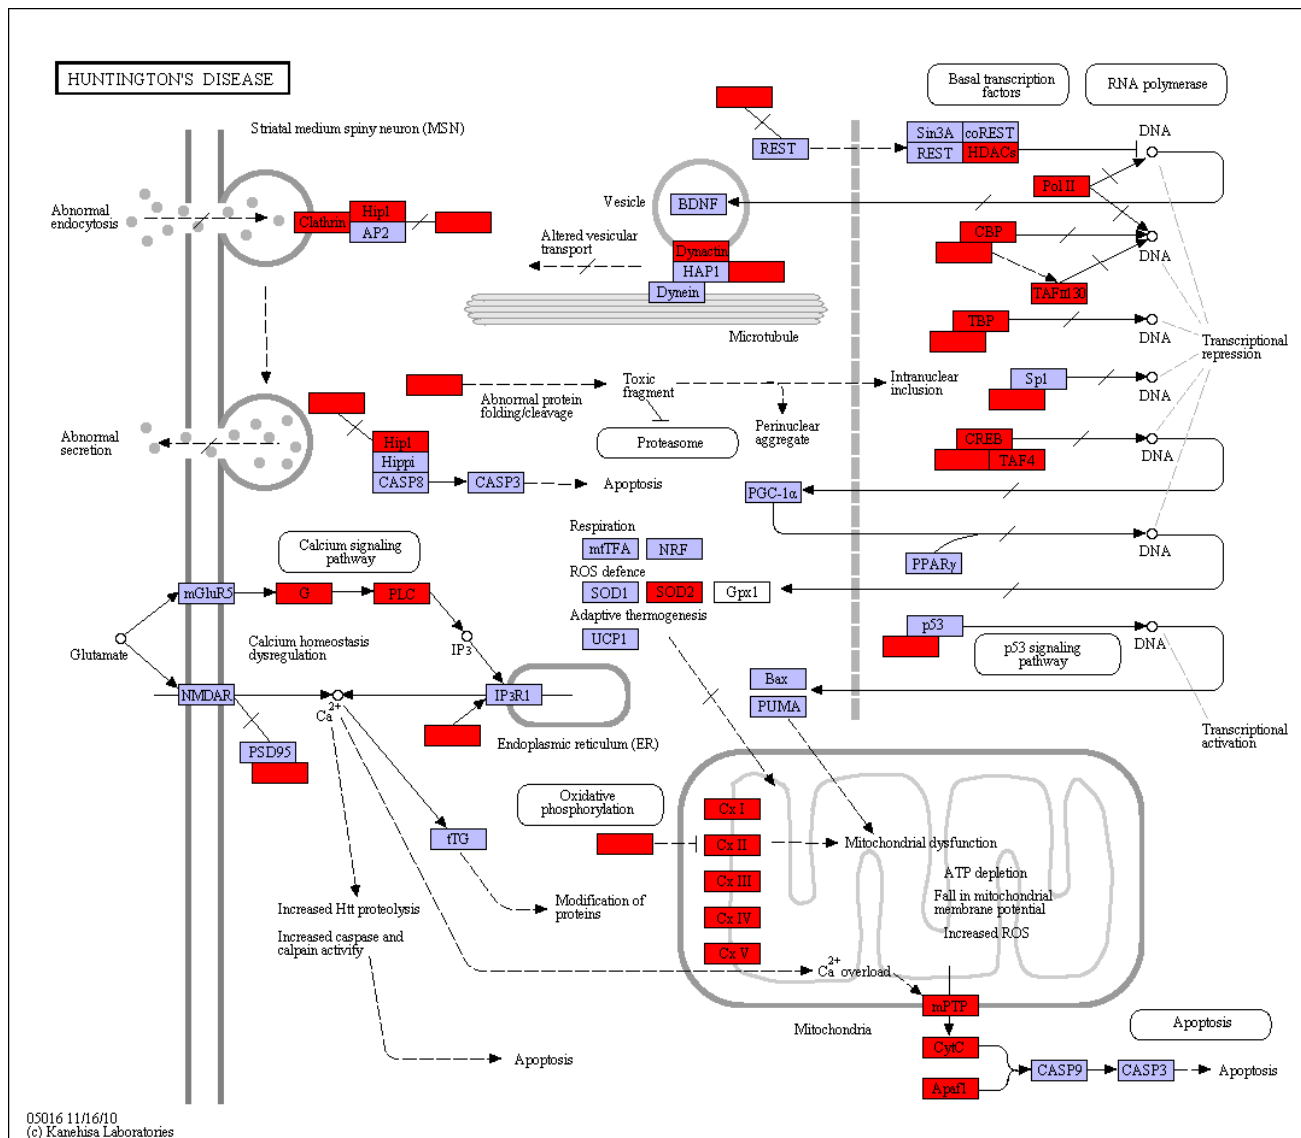

Figure 4: ko05016 Huntington's disease



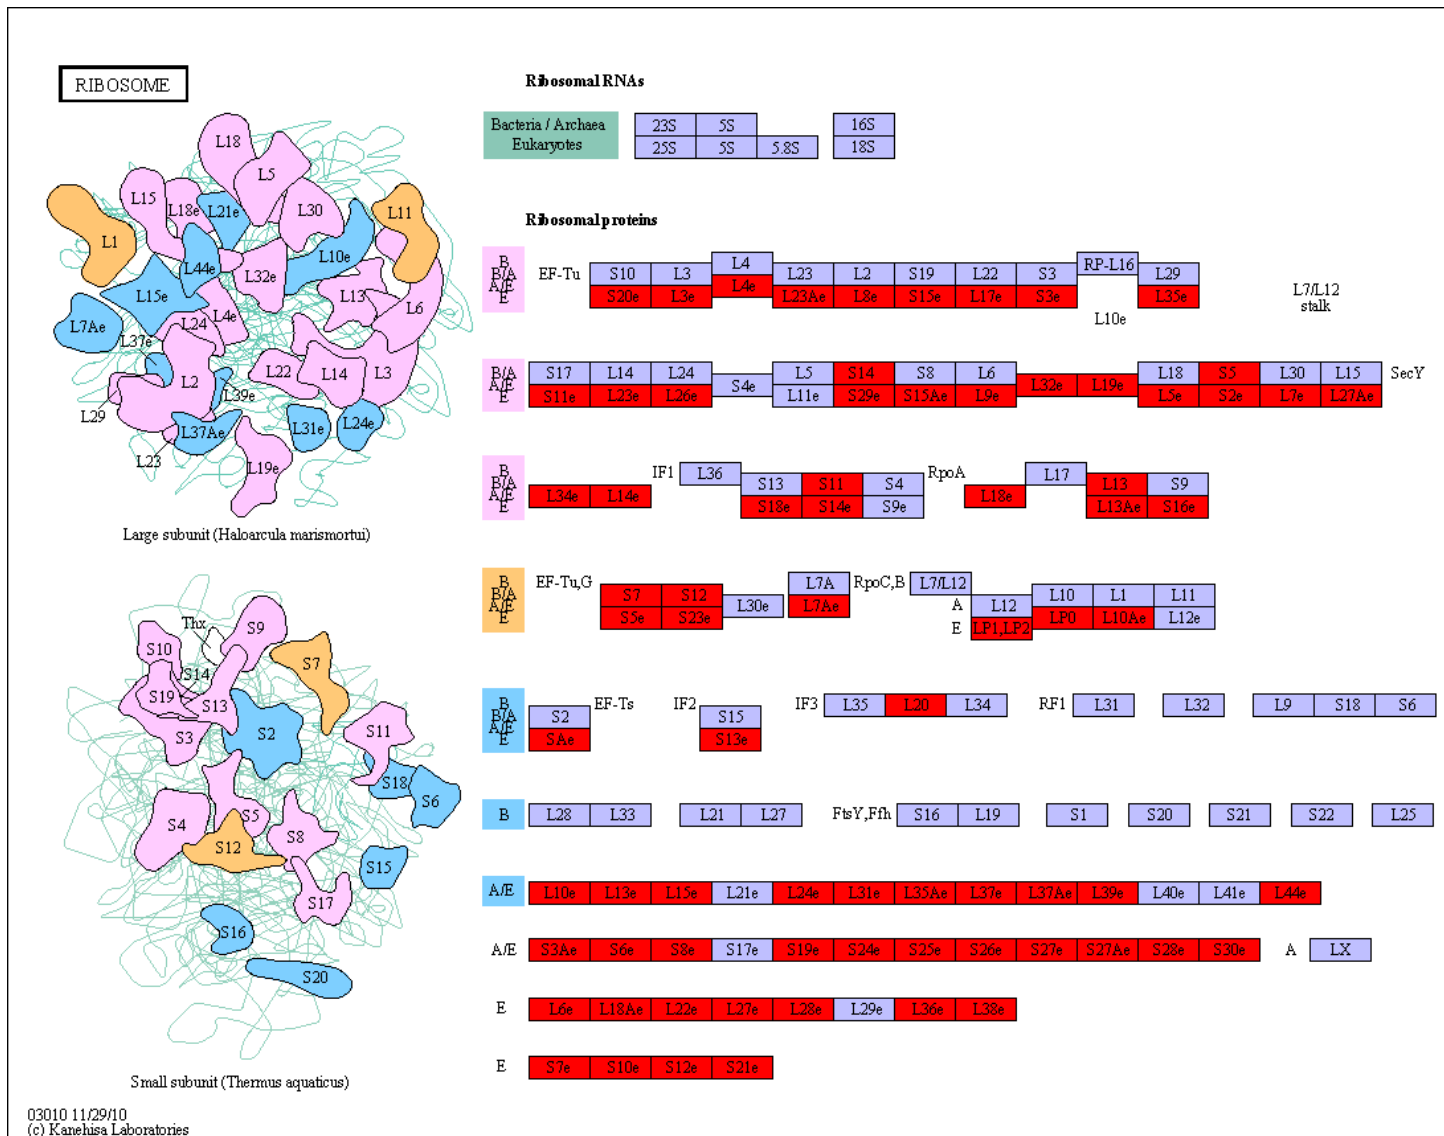

Figure 6: ko03010 Ribosome





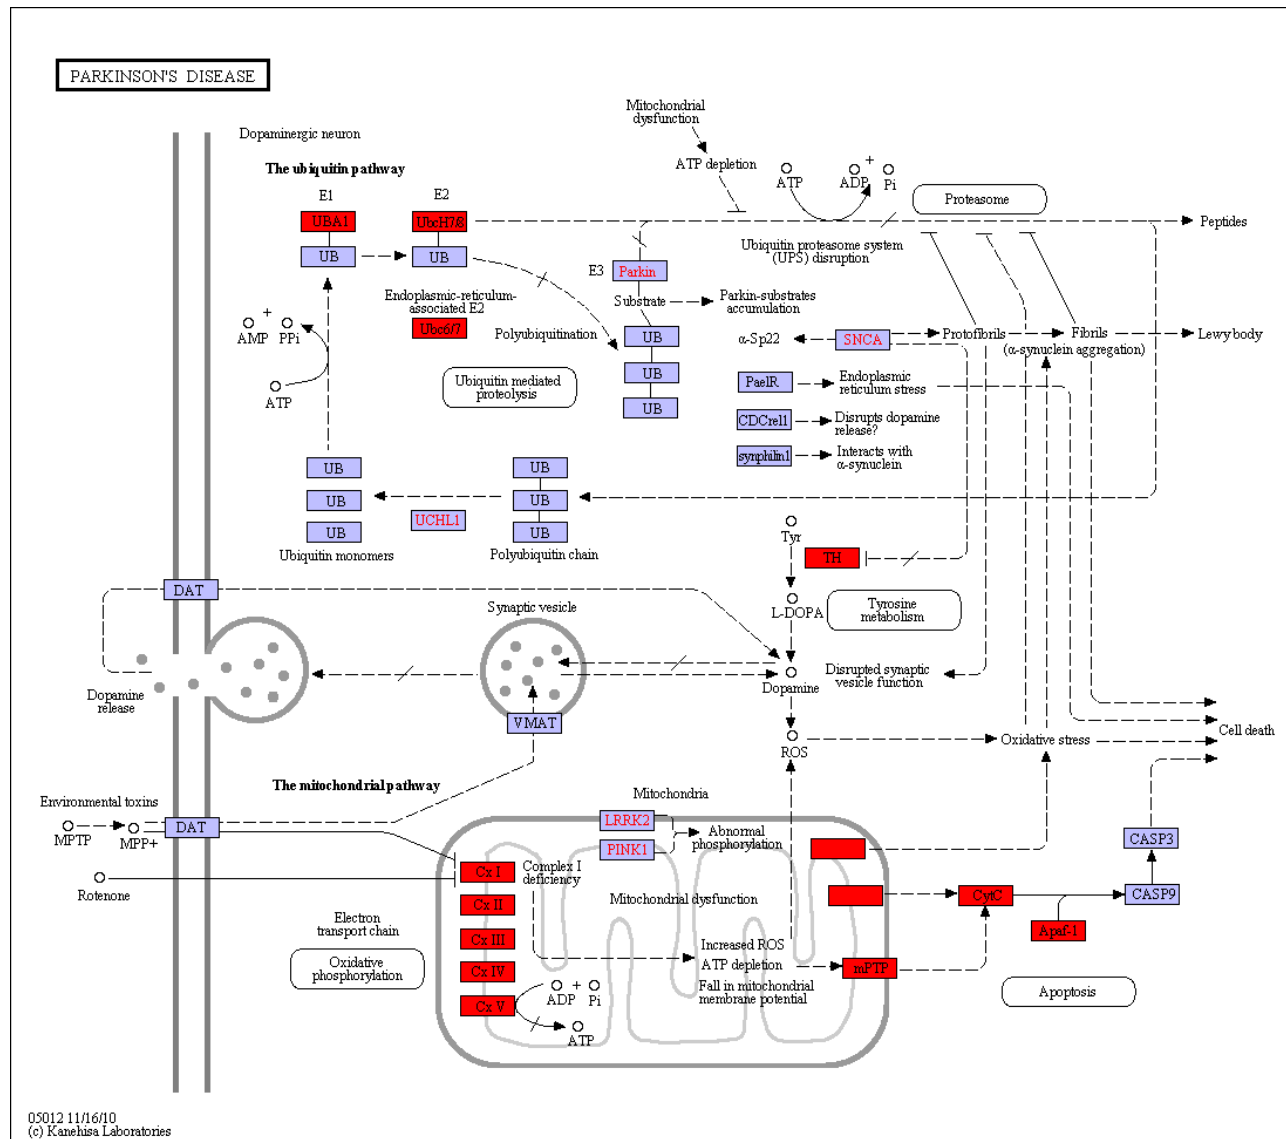

Figure 8: ko05012 Parkinson's disease

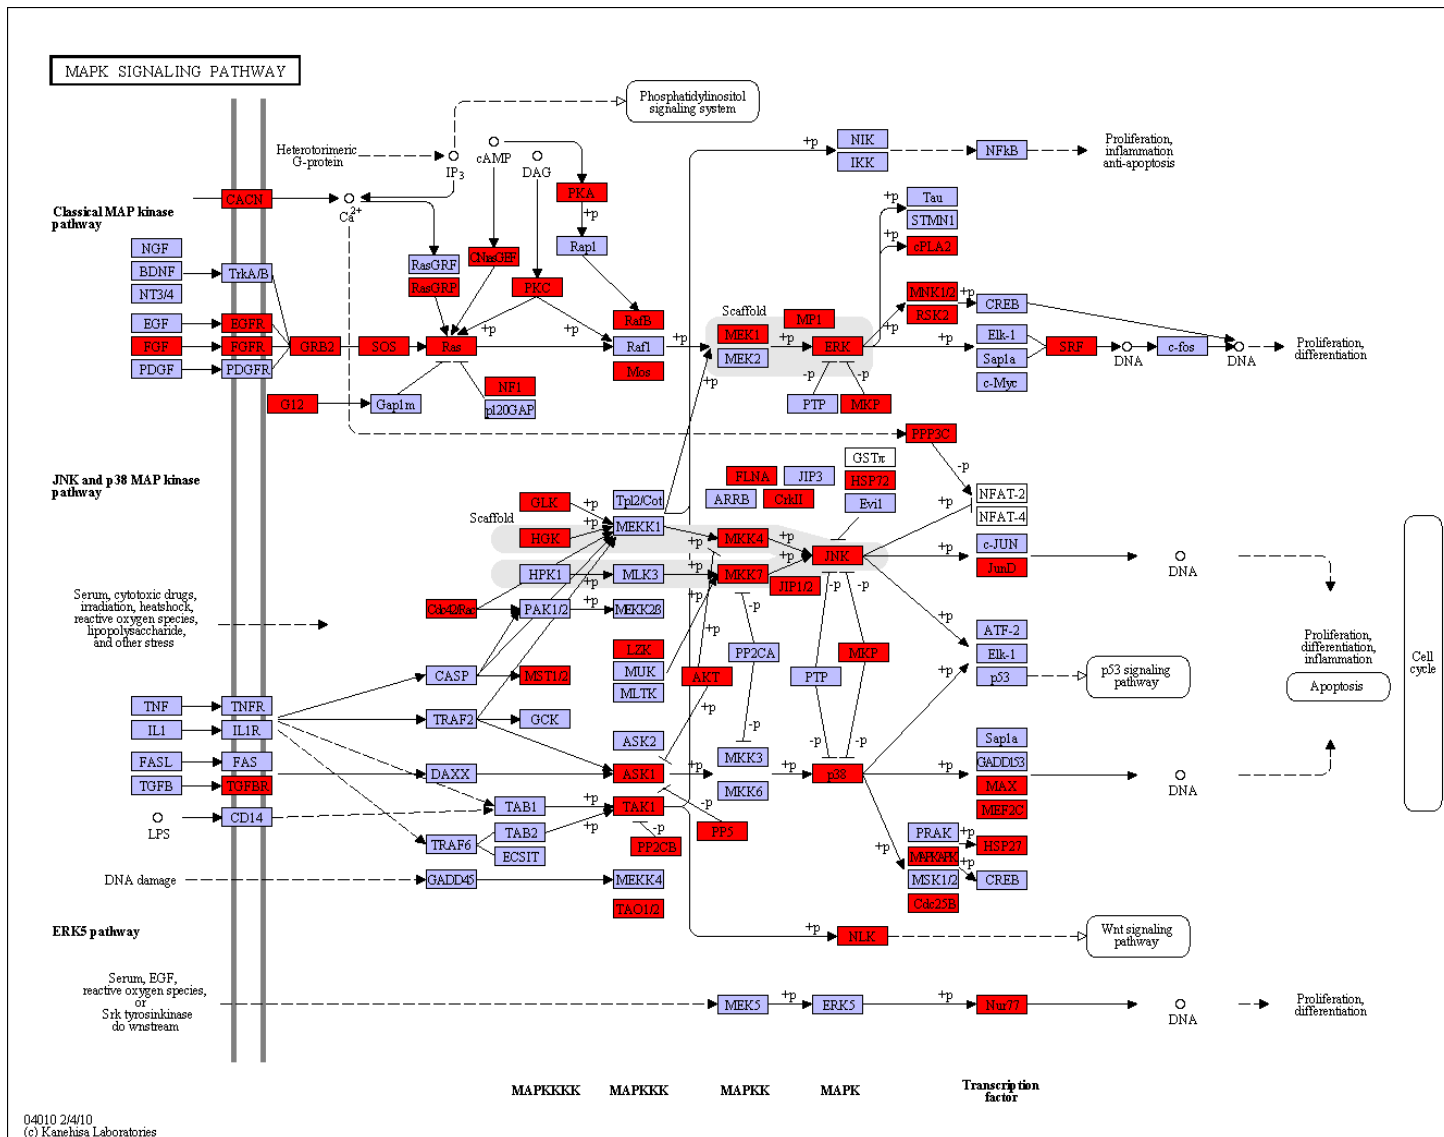

Figure 9: ko04010 MAPK signaling pathway





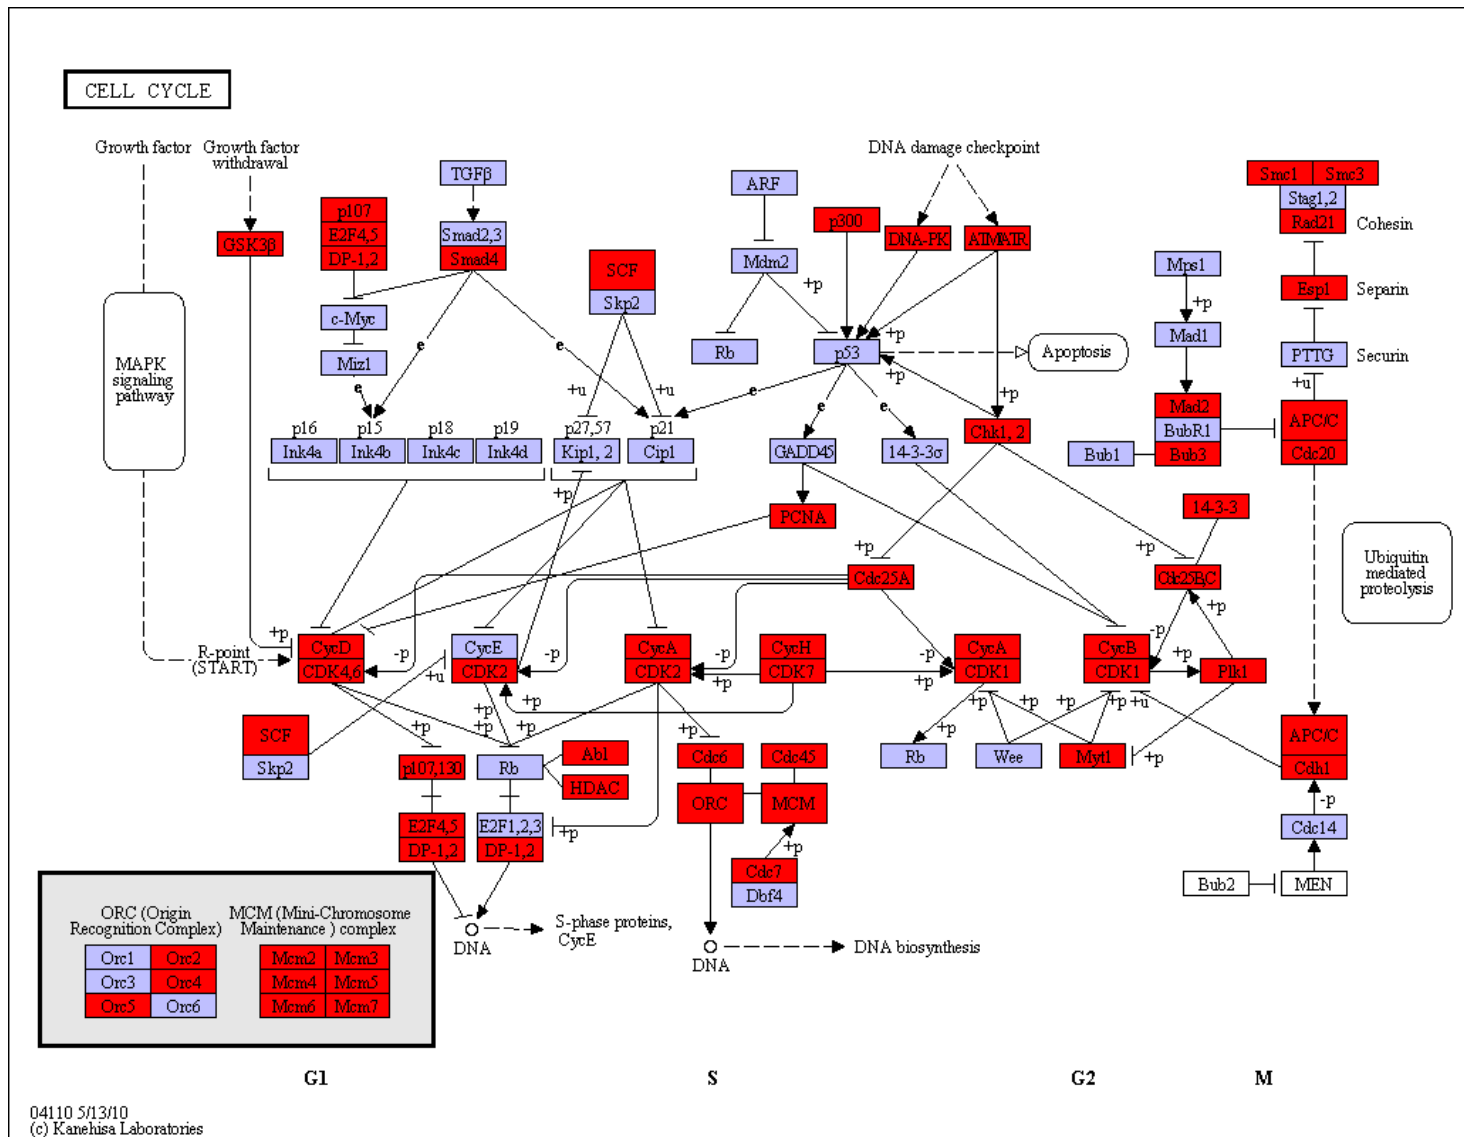

Figure 12: ko04110 Cell cycle



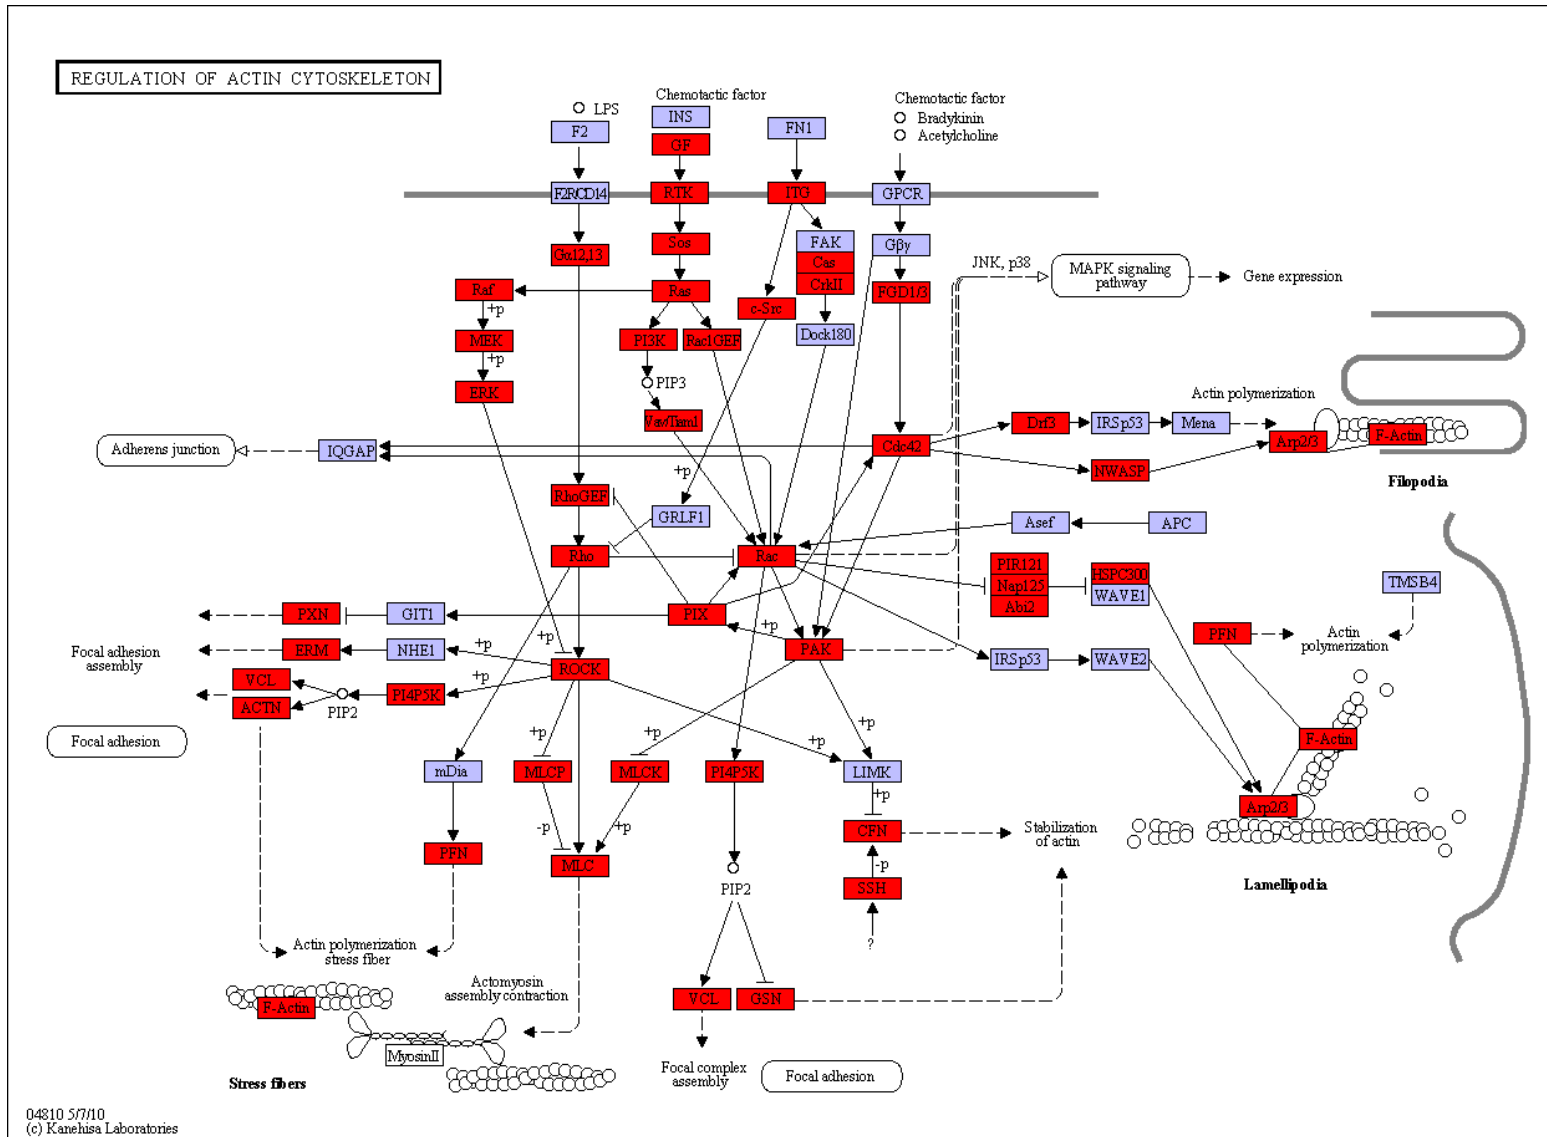

Figure 14: ko04810 Regulation of actin cytoskeleton

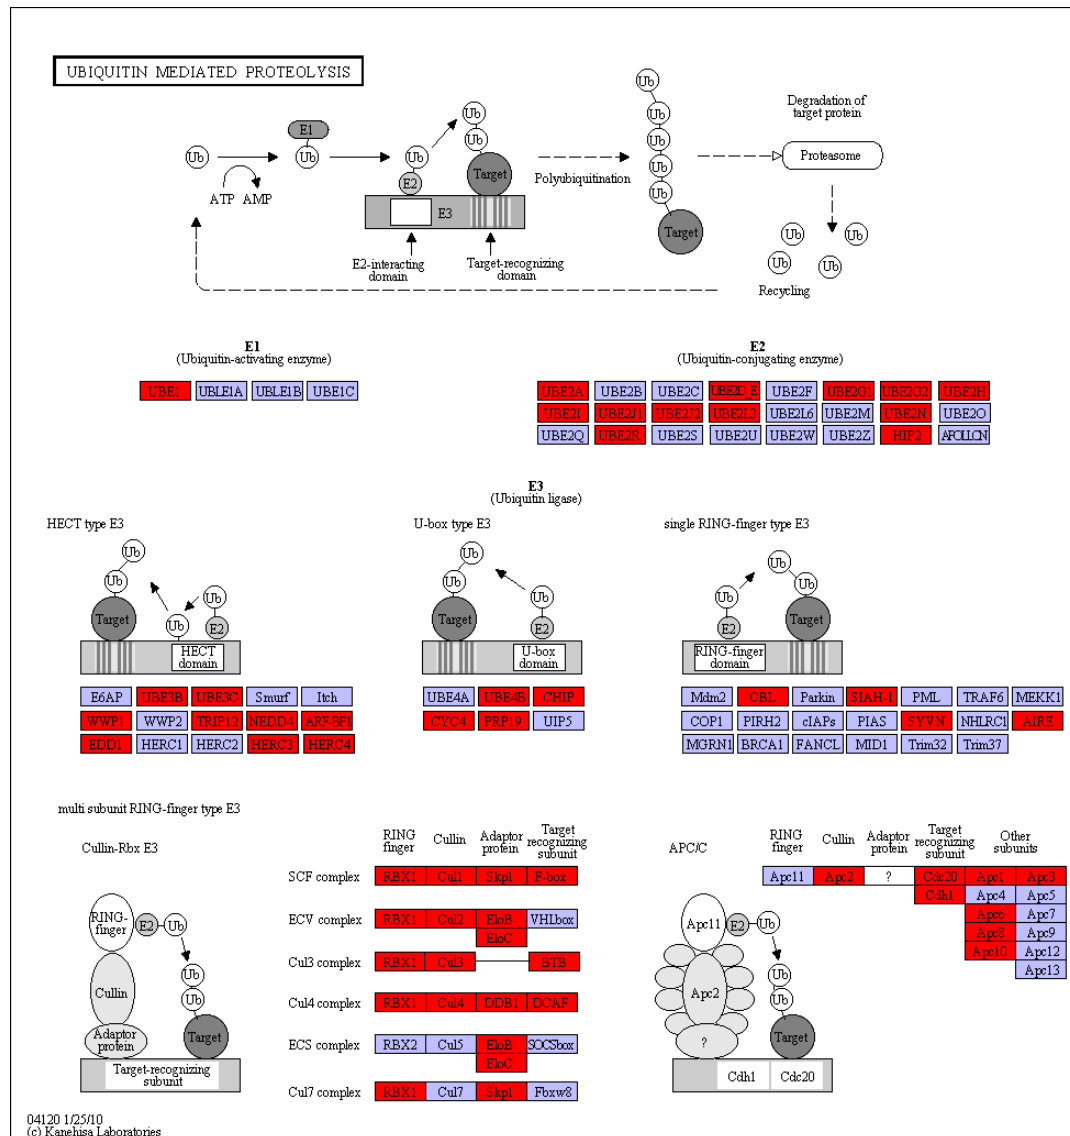

Figure 15: ko04120 Ubiquitin mediated proteolysis



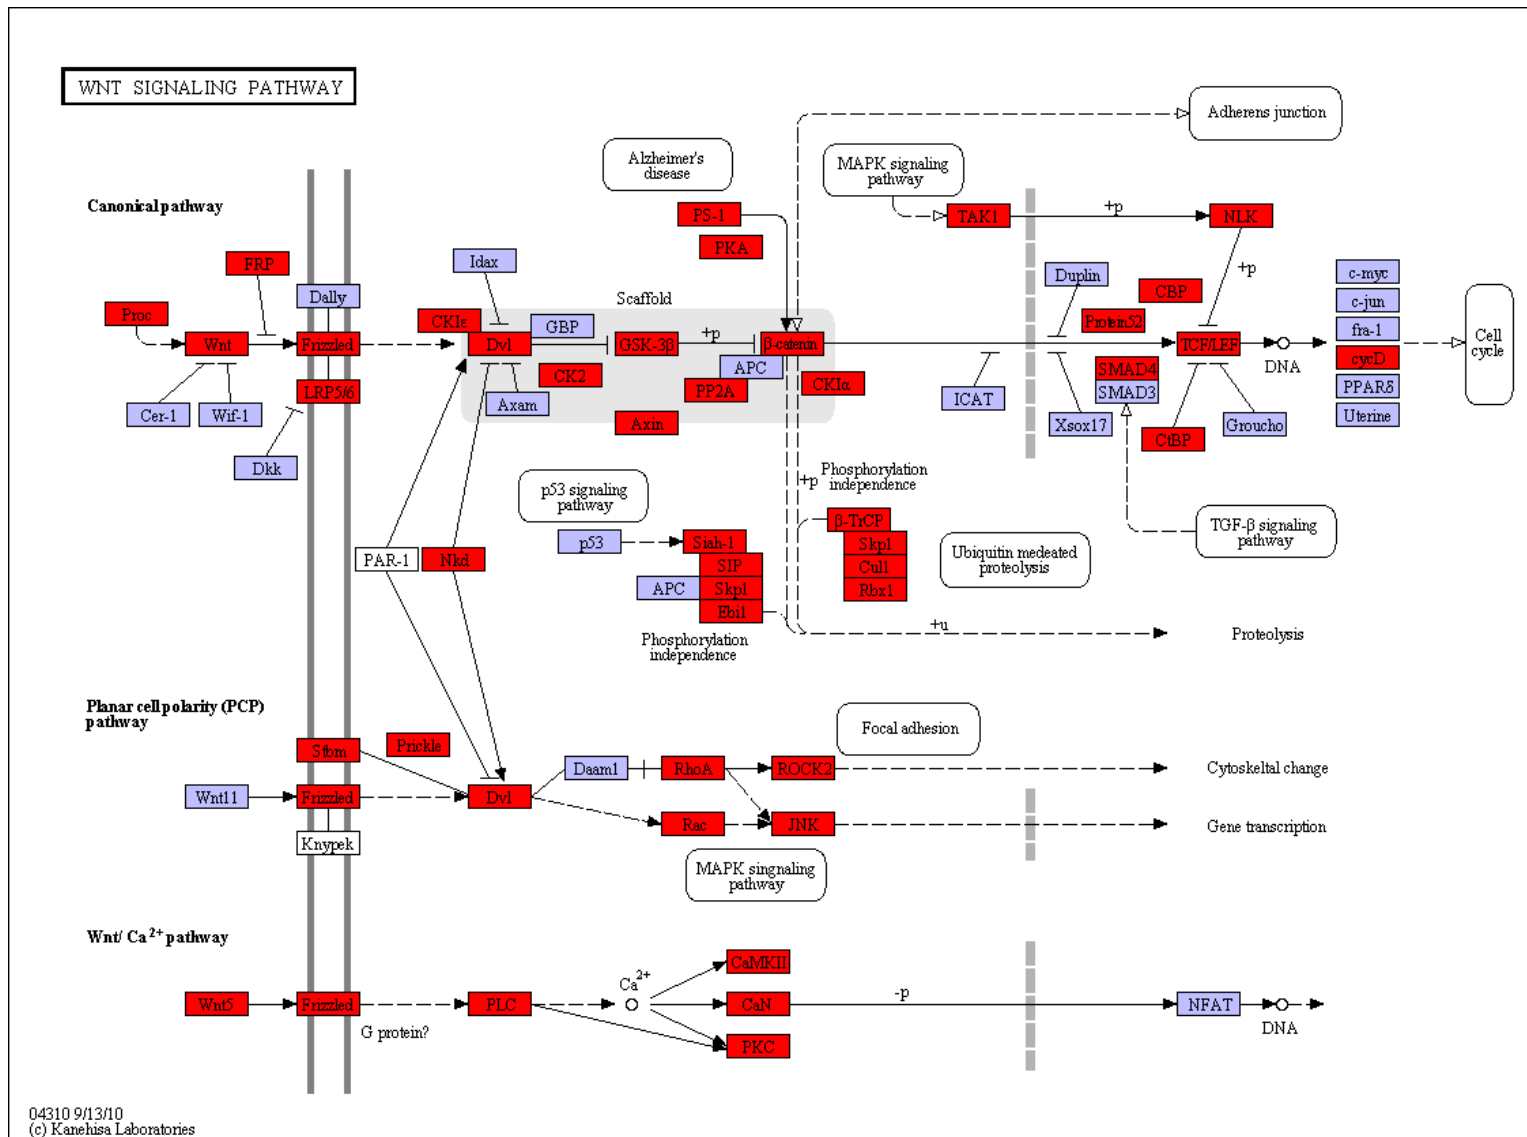

Figure 16: ko04310 Wnt signaling pathway

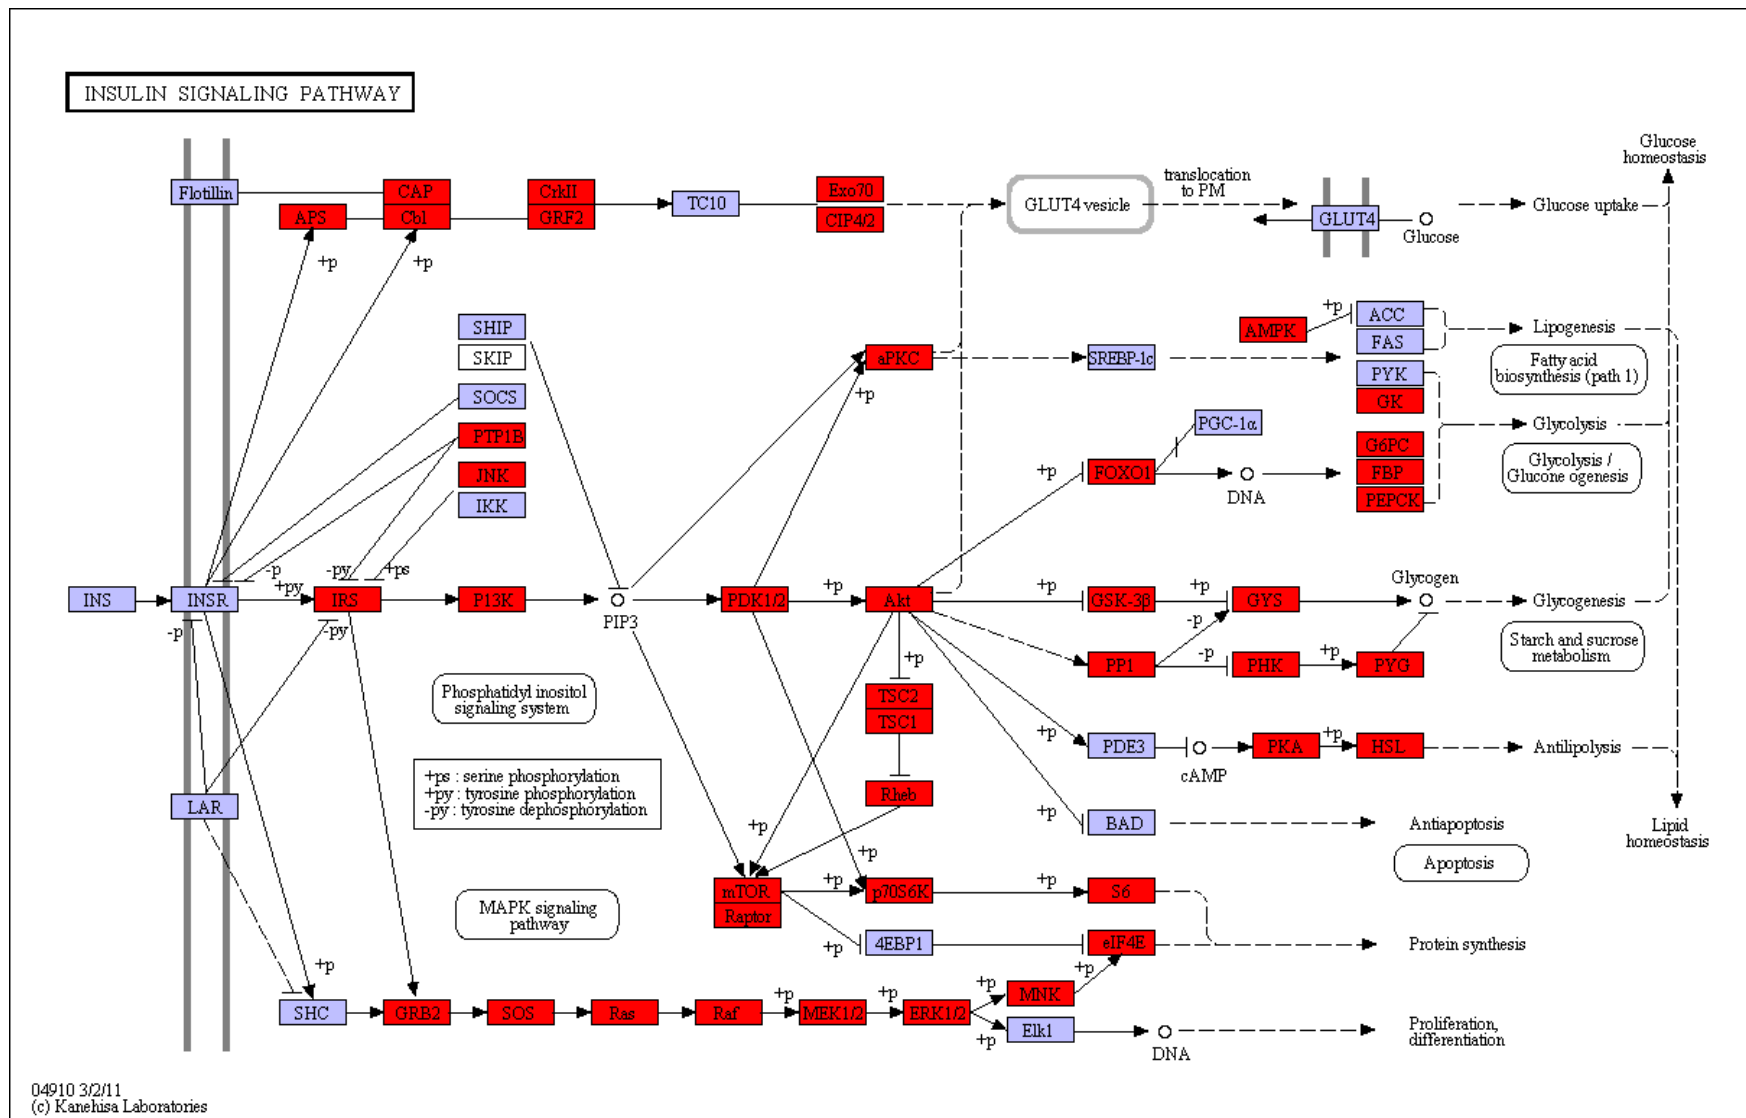

Figure 17: ko04910 Insulin signaling pathway

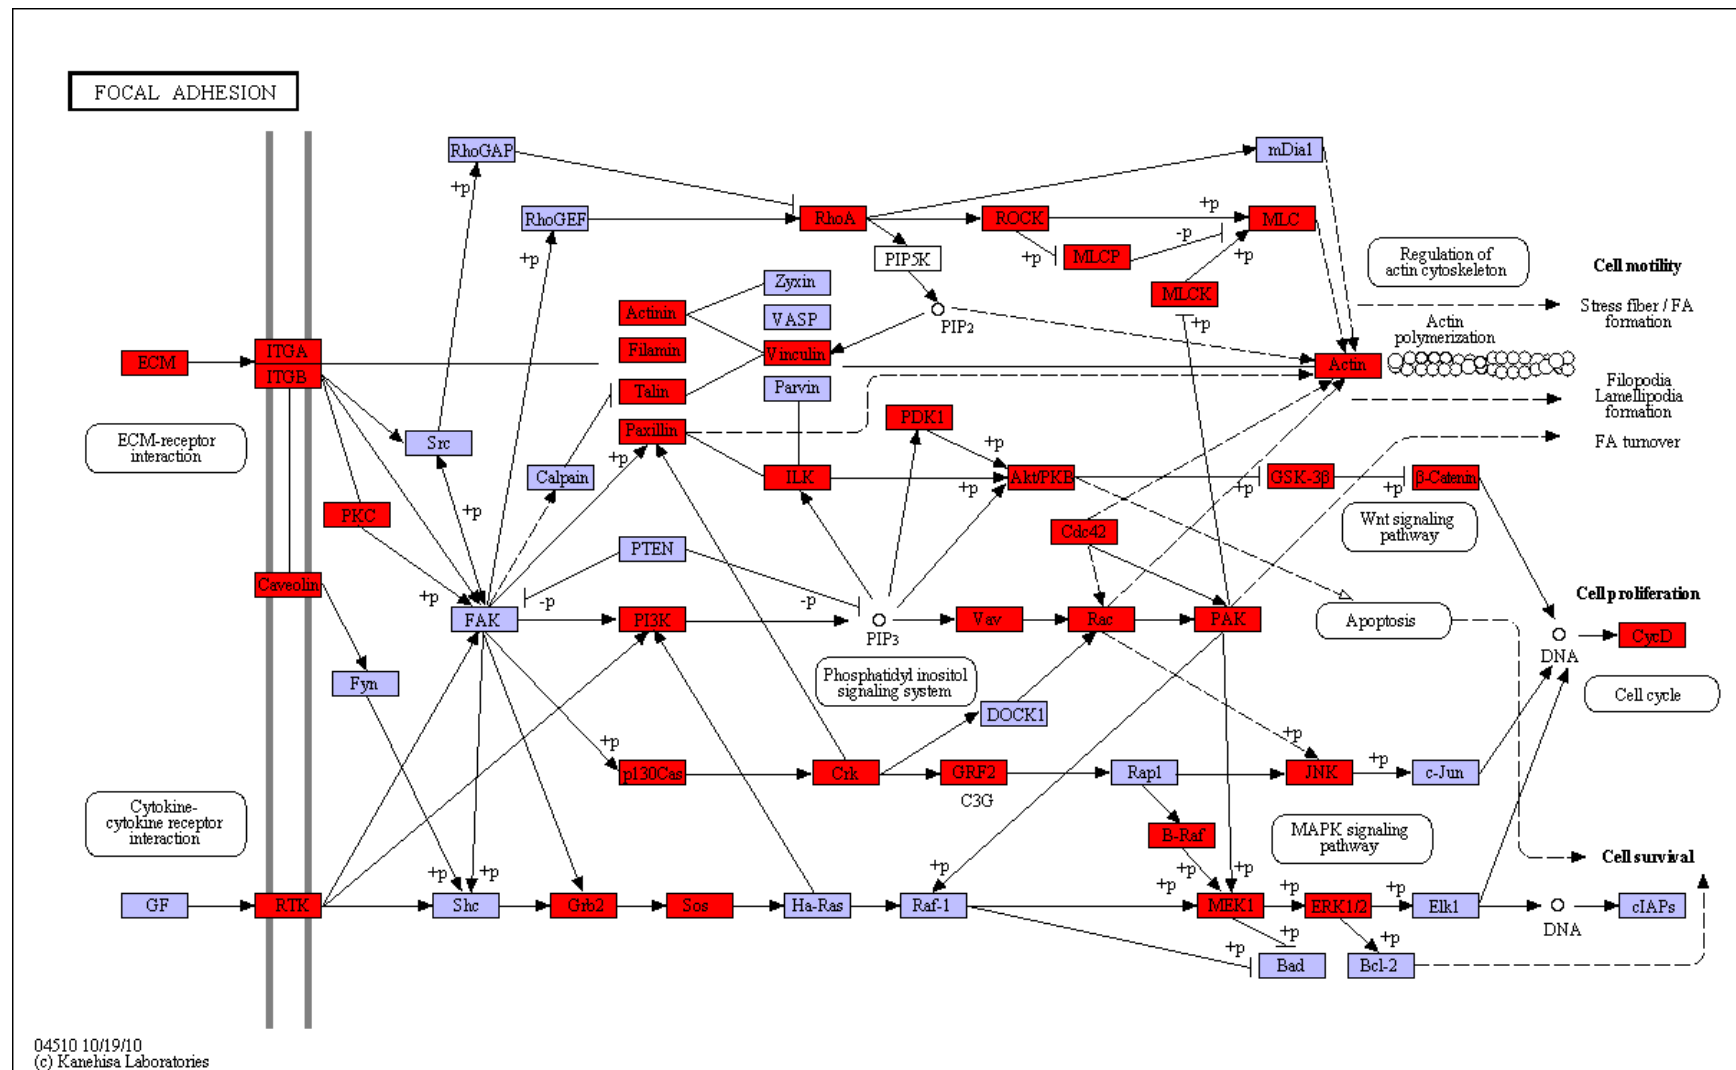

Figure 18: ko04510 Focal adhesion

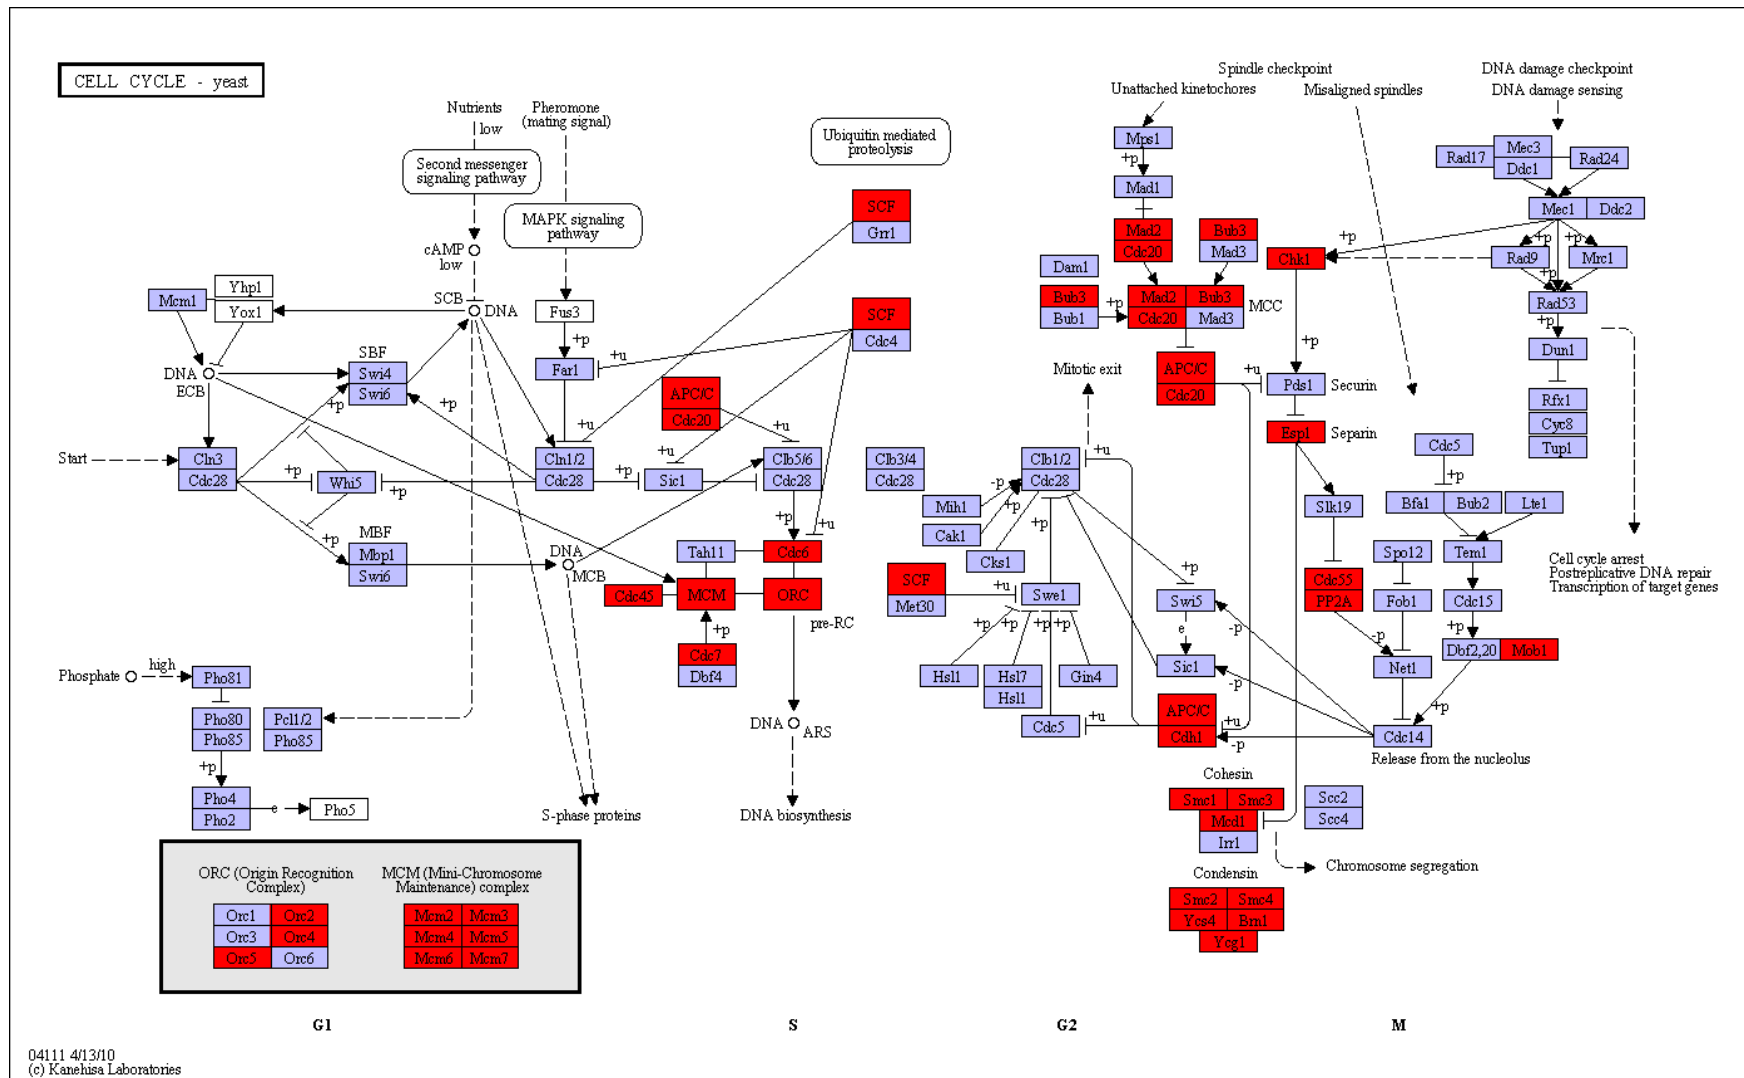

Figure 19: ko04111 Cell cycle - yeast



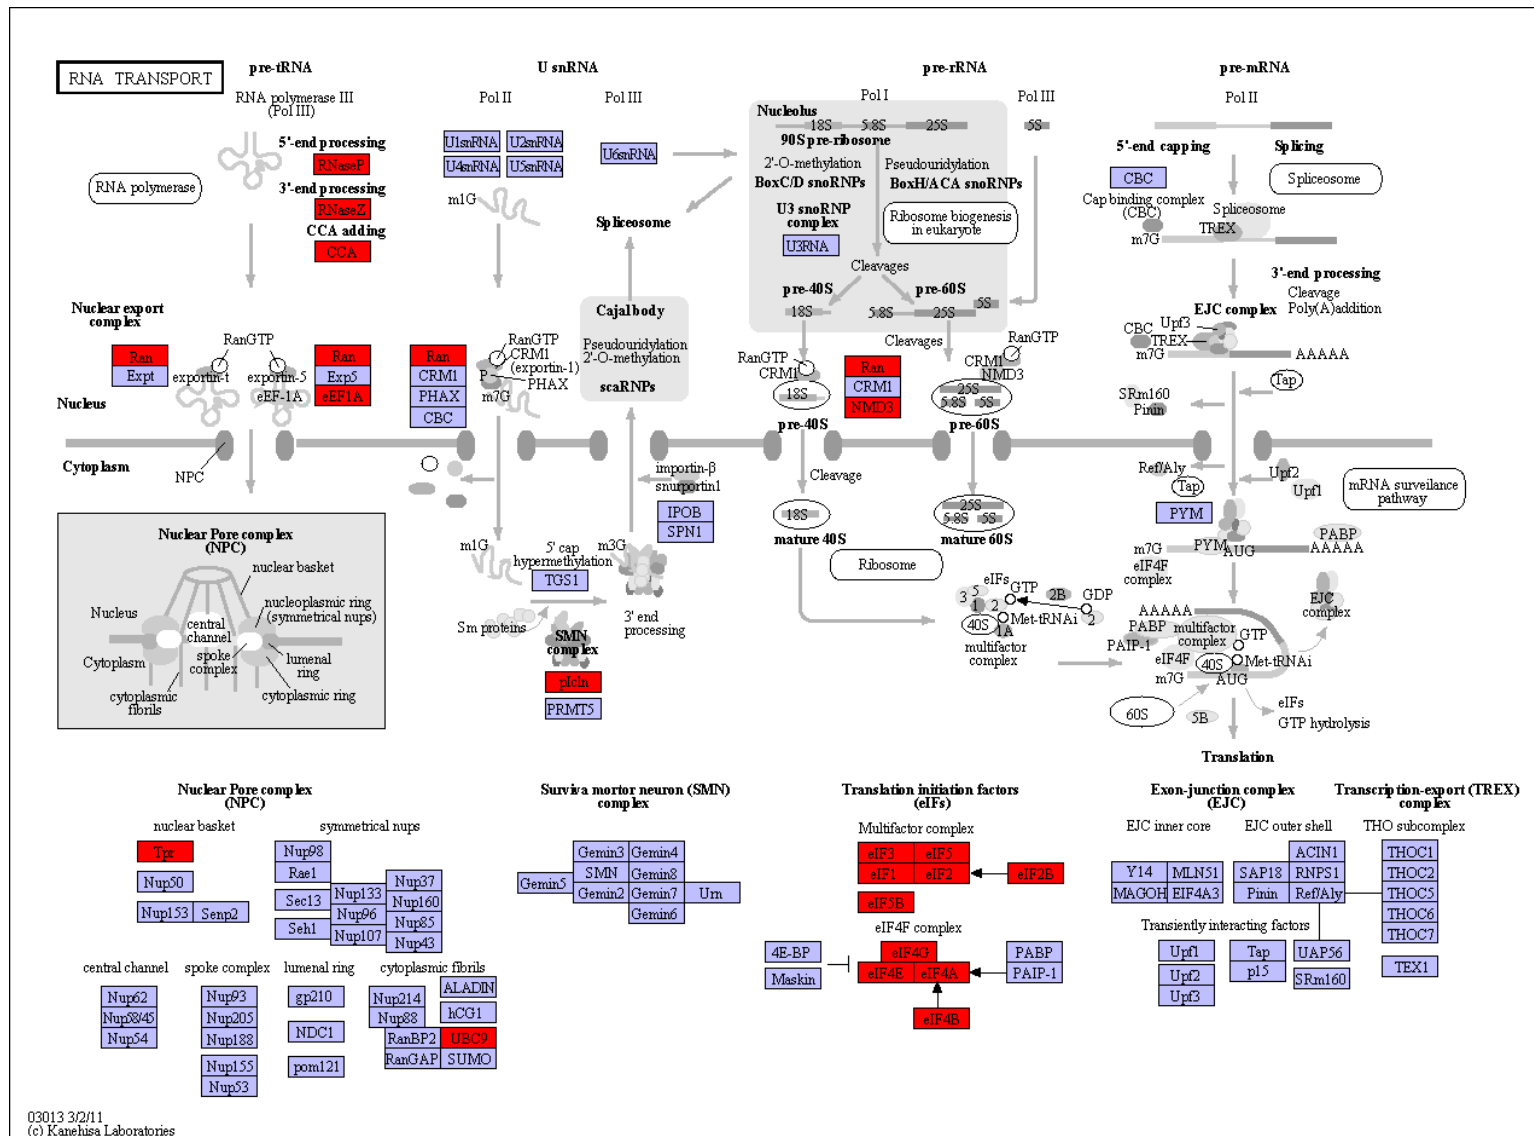

Figure 21: ko03013 RNA transport

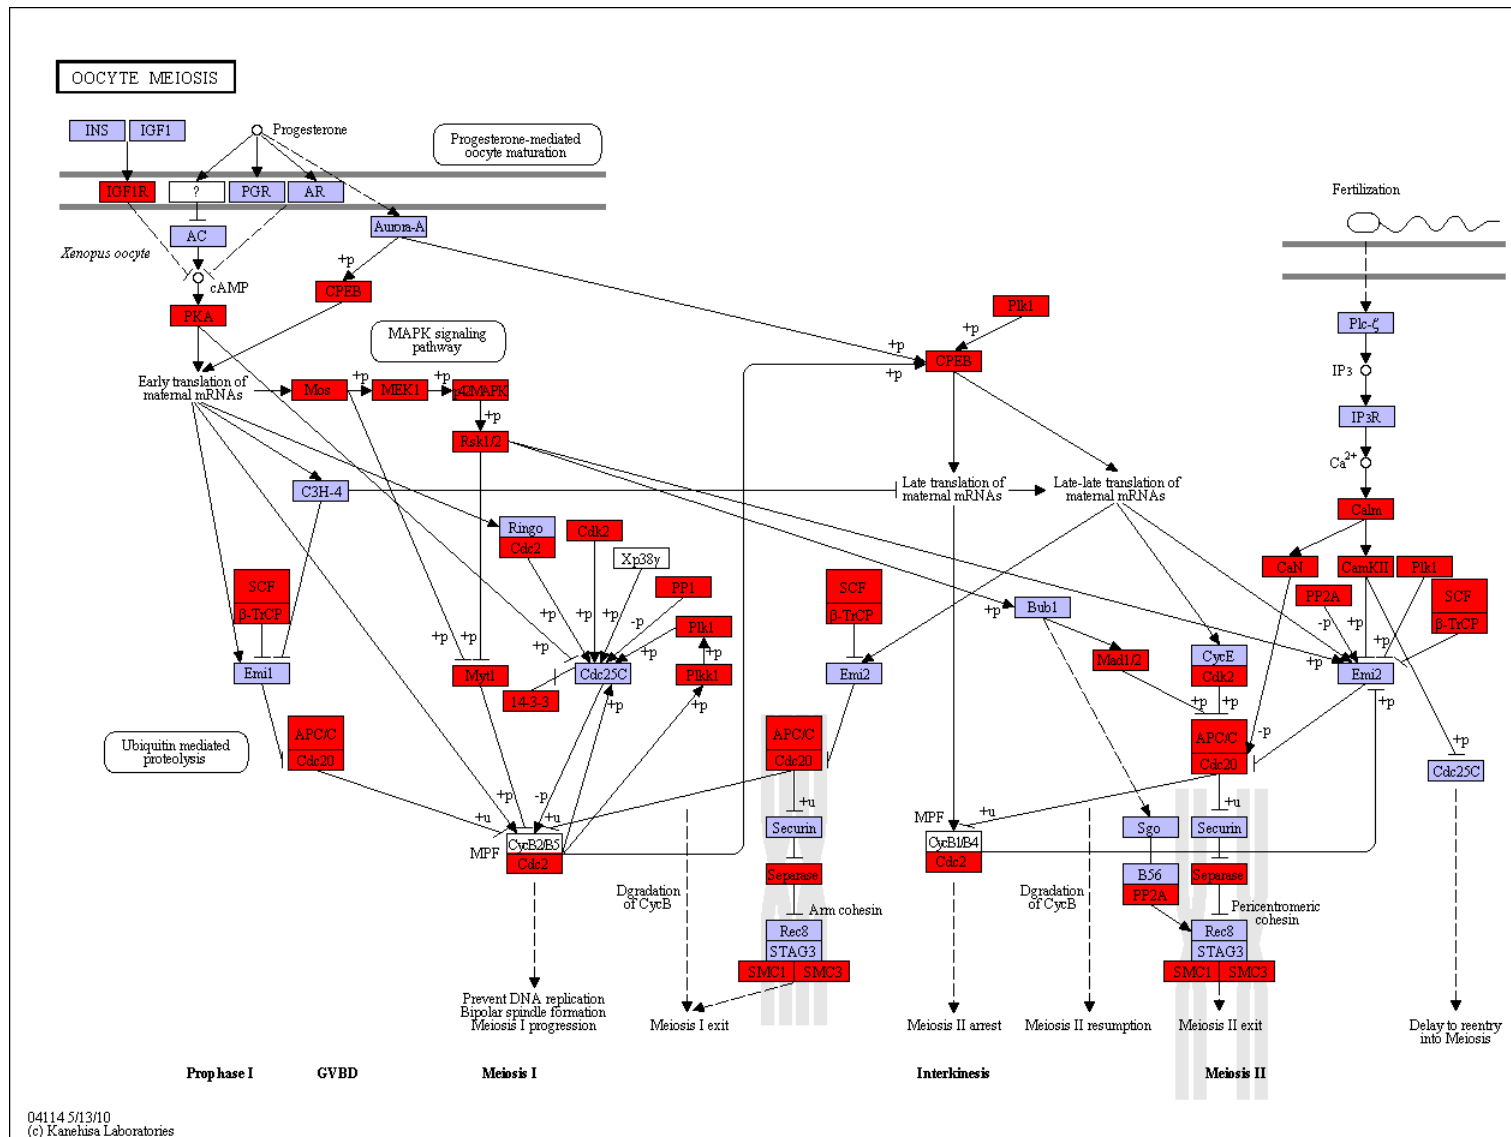

Figure 22: ko04114 Oocyte meiosis

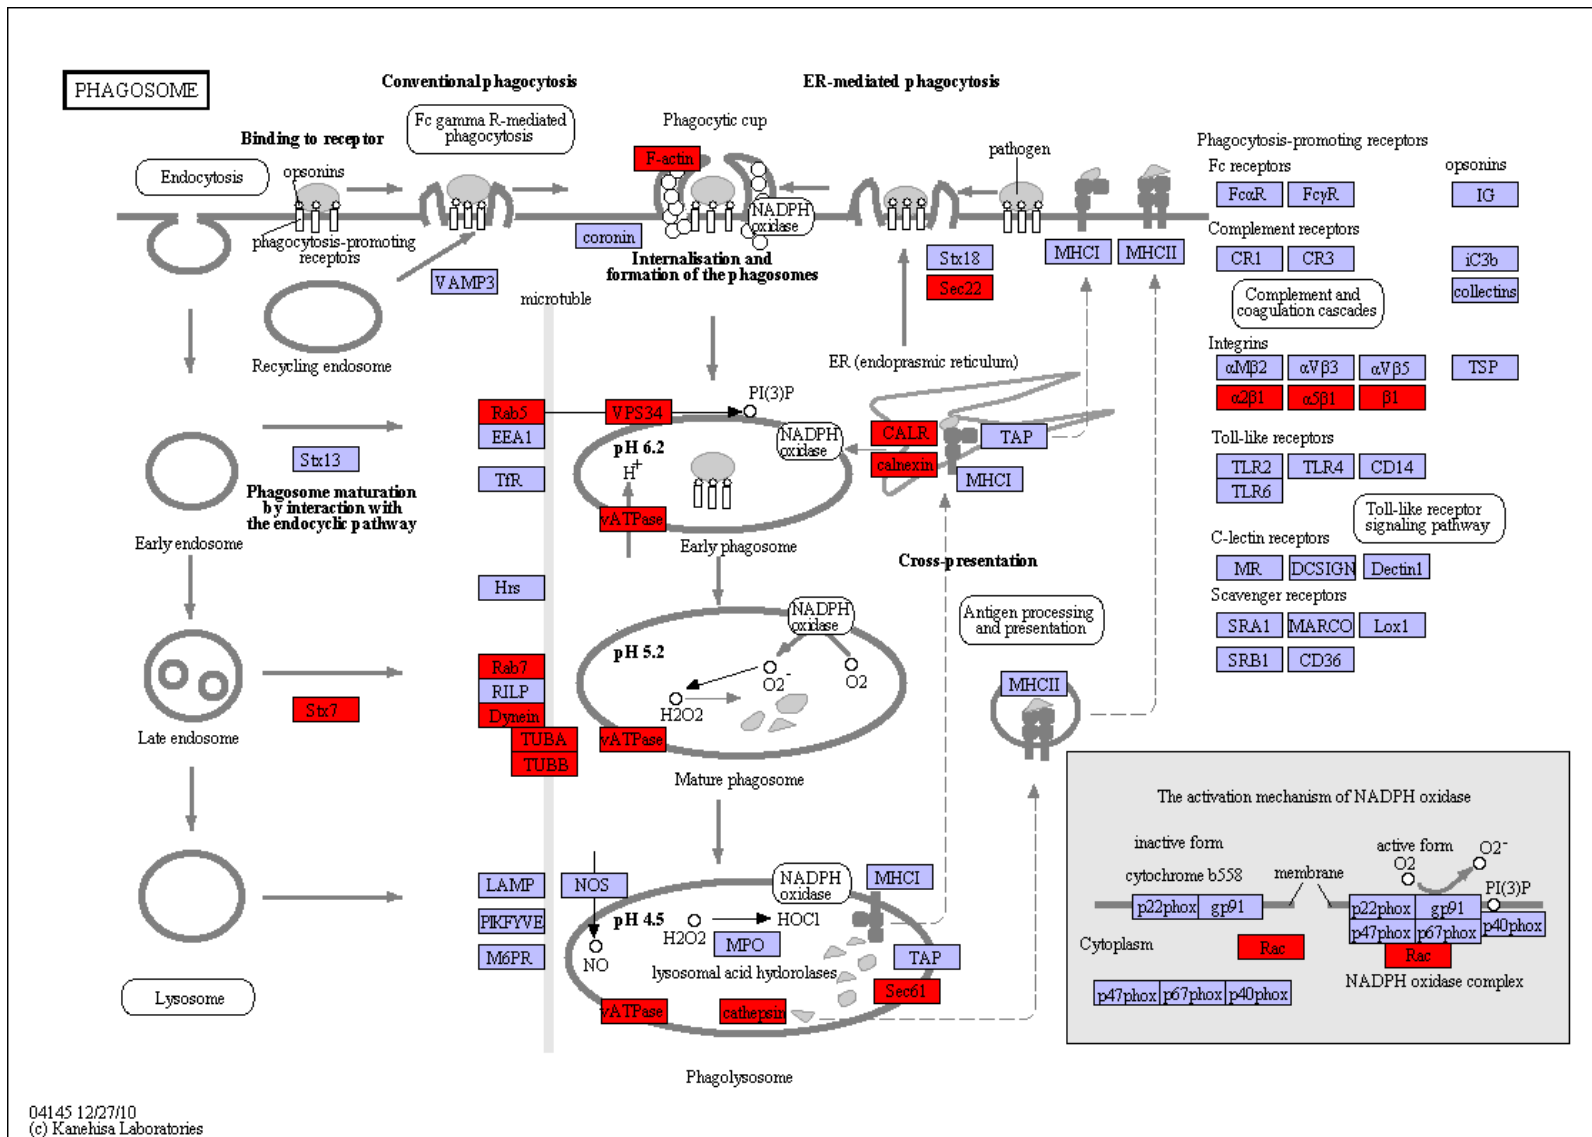

Figure 23: ko04145 Phagosome





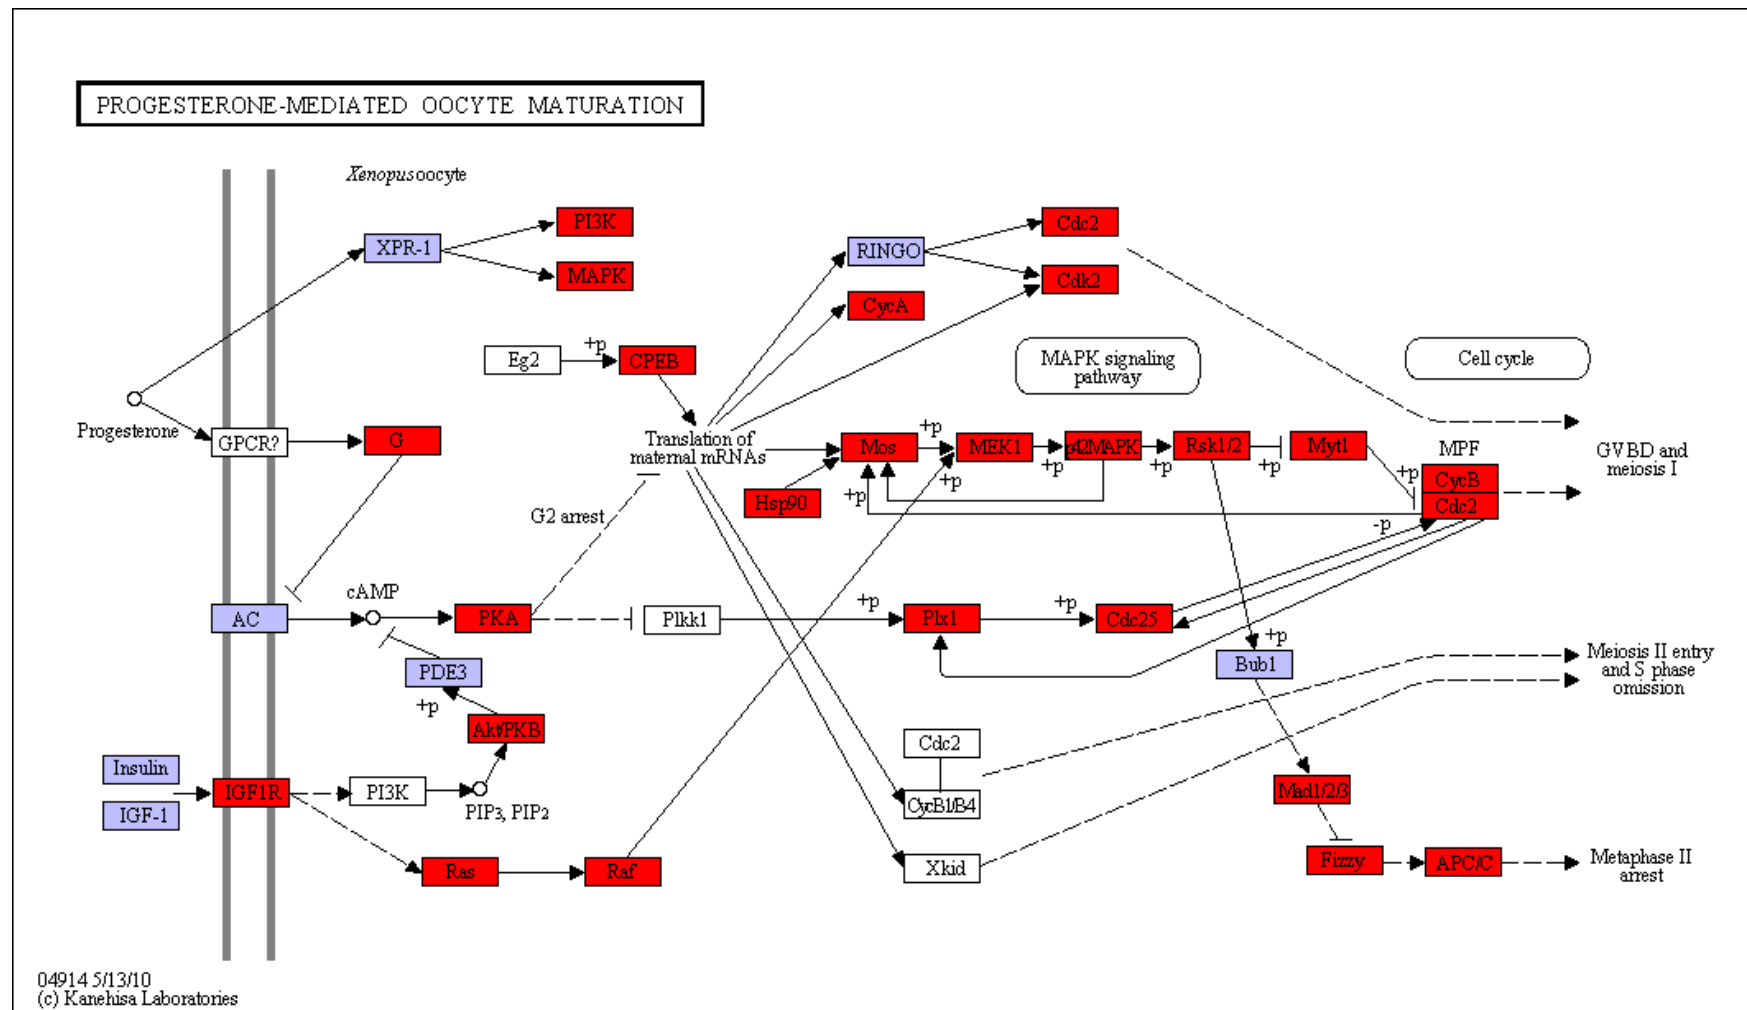

Figure 25: ko04914 Progesterone-mediated oocyte maturation

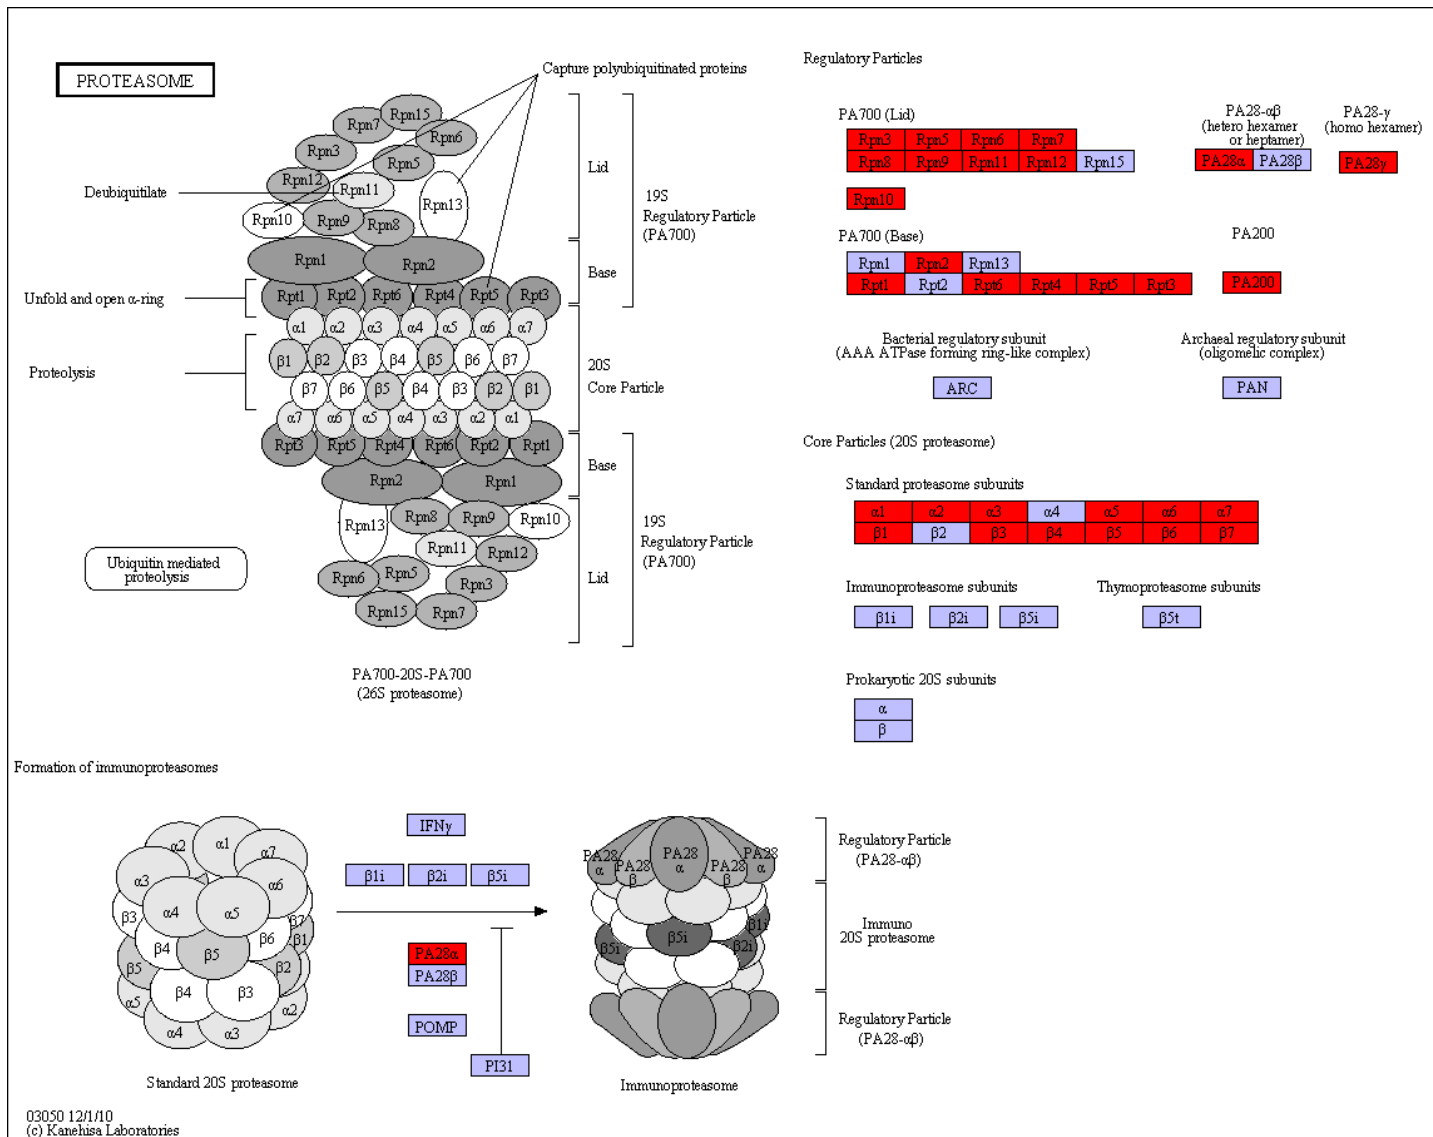

Figure 26: ko03050 Proteasome

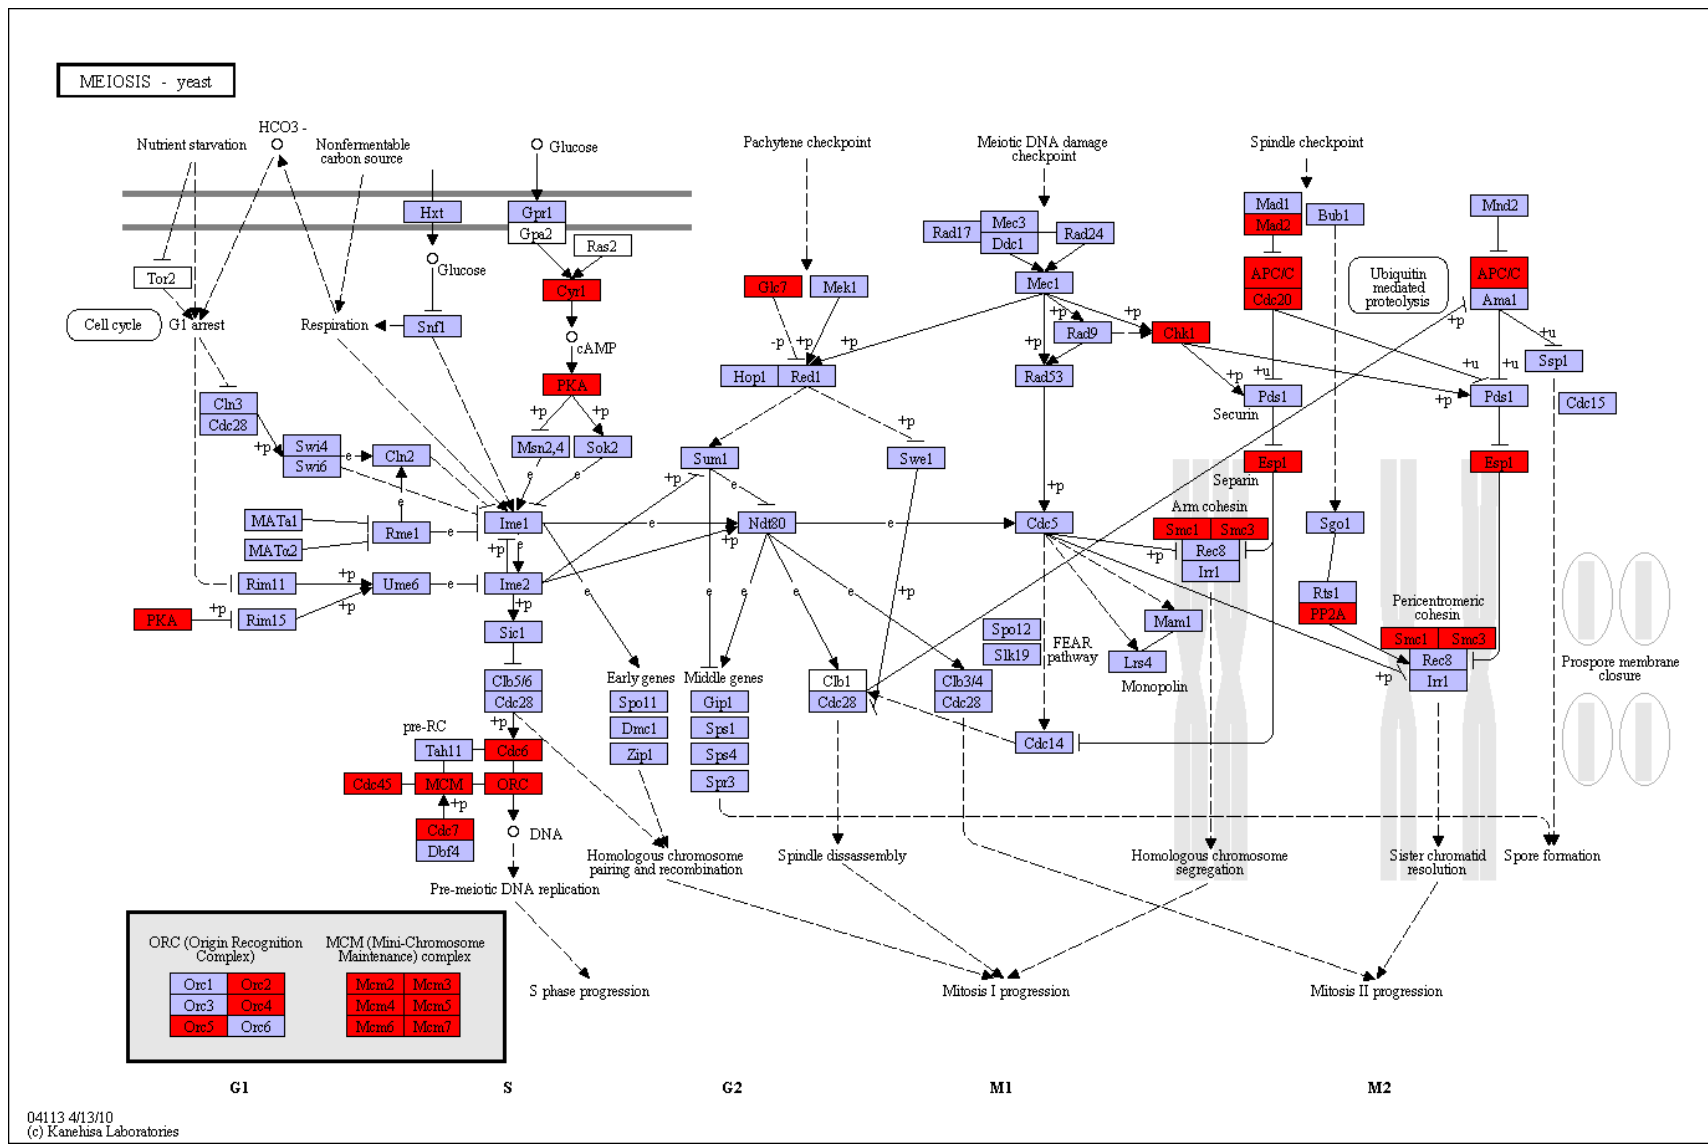

Figure 27: ko04113 Meiosis - yeast

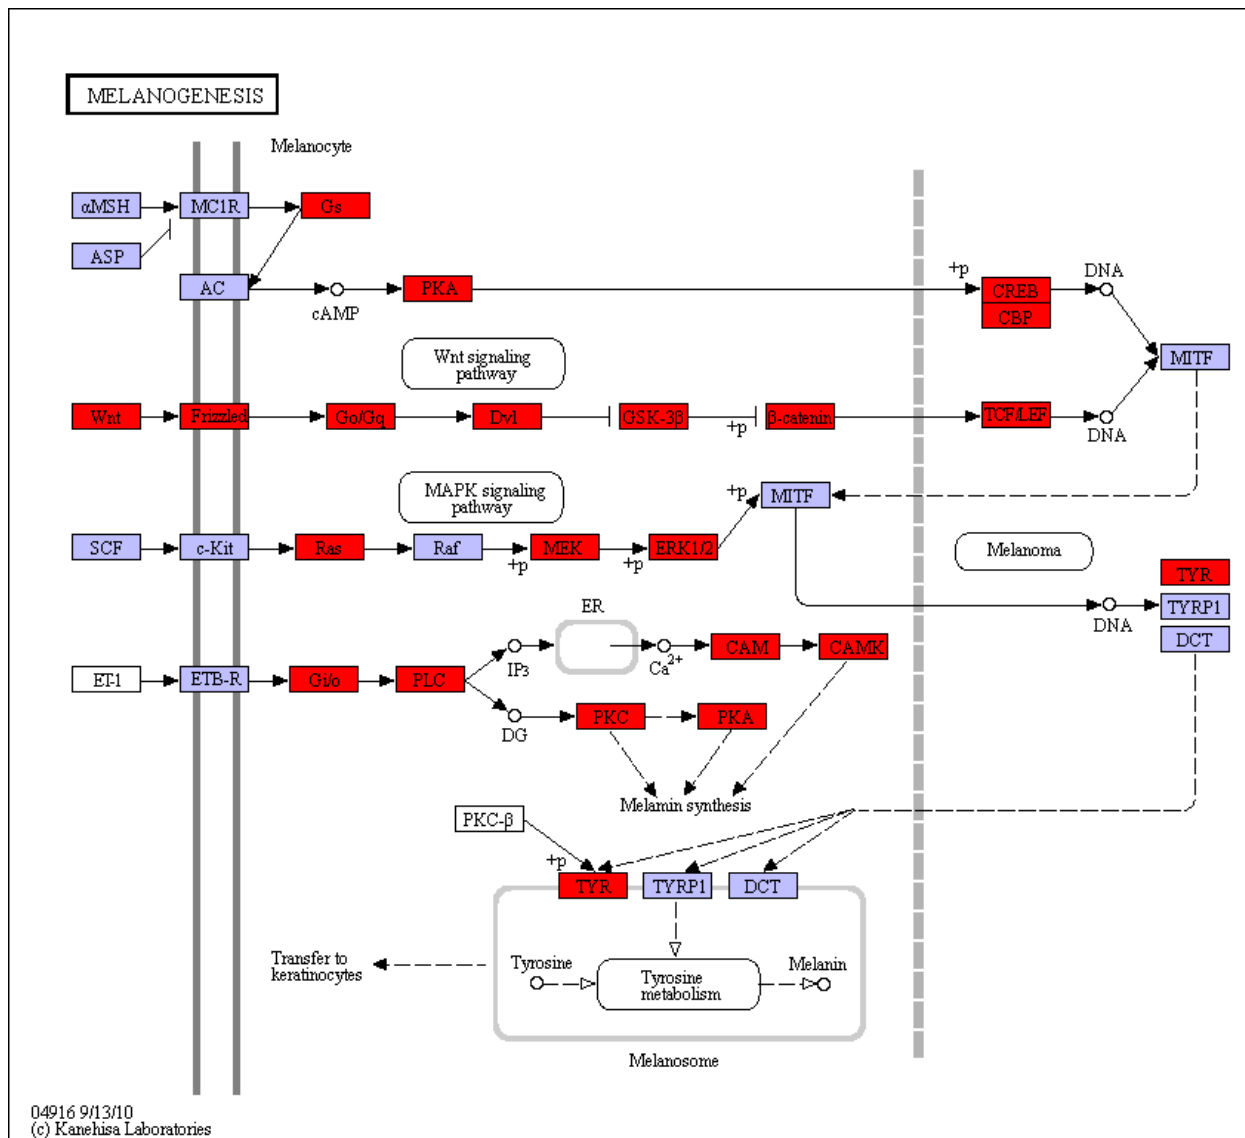

Figure 28: ko04916 Melanogenesis



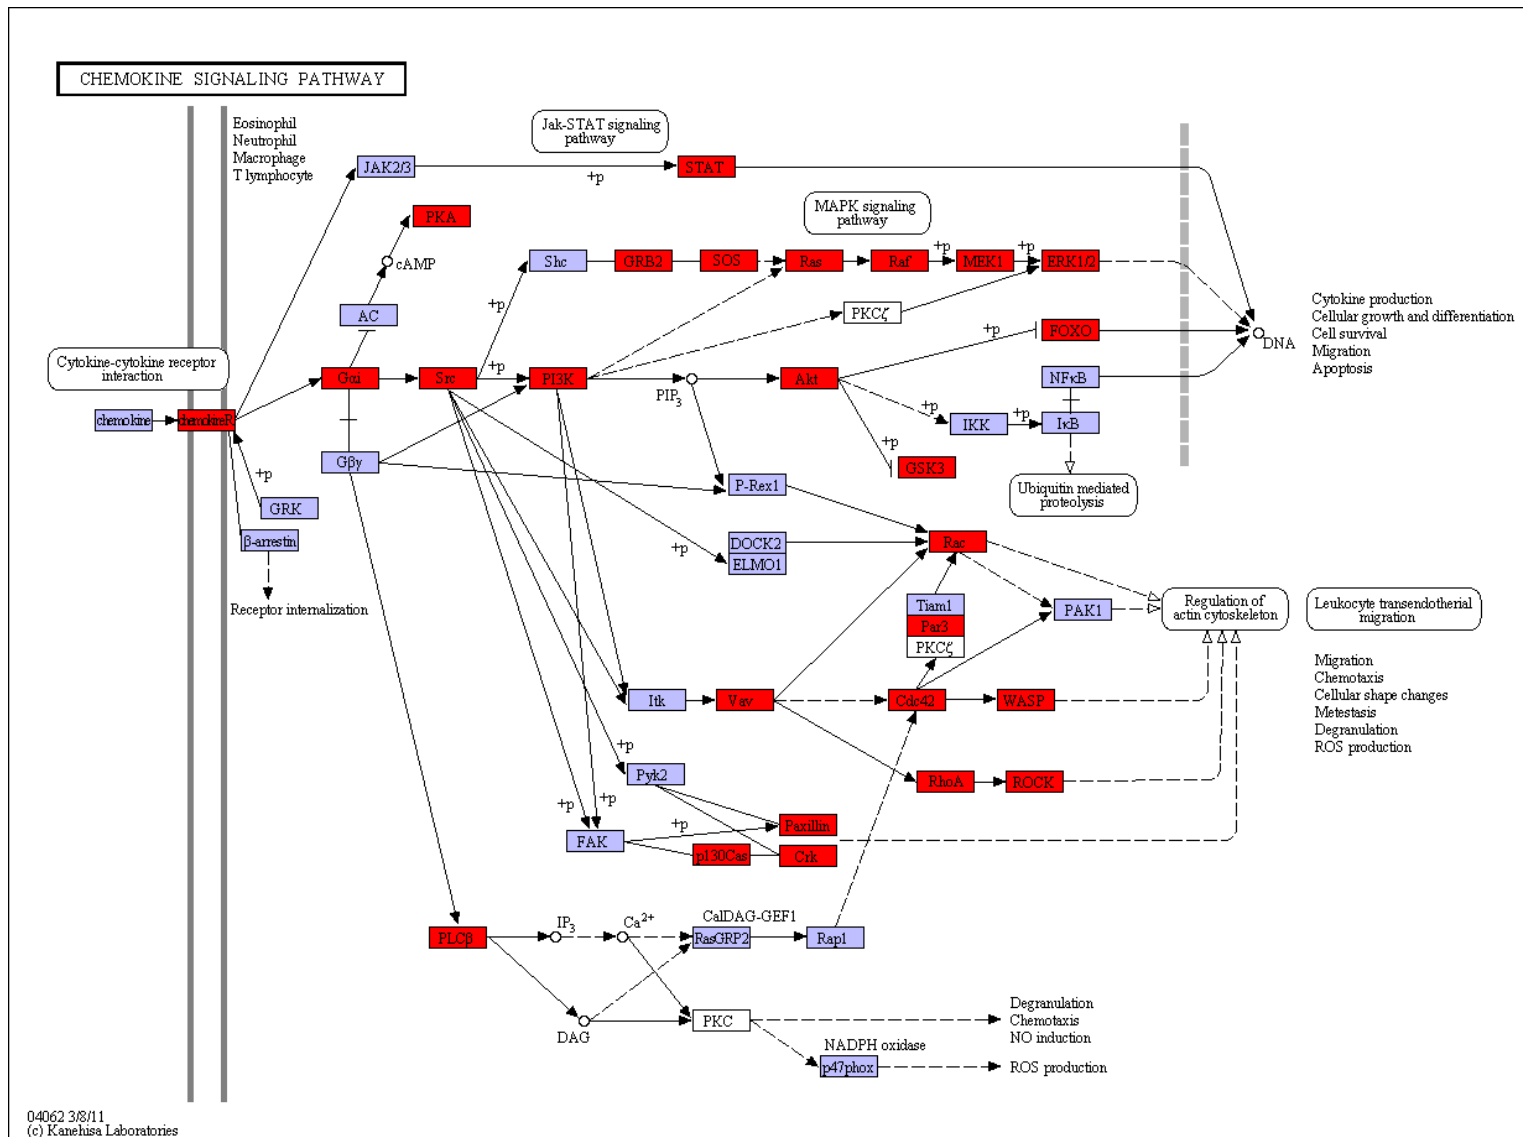

Figure 30: ko04062 Chemokine signaling pathway







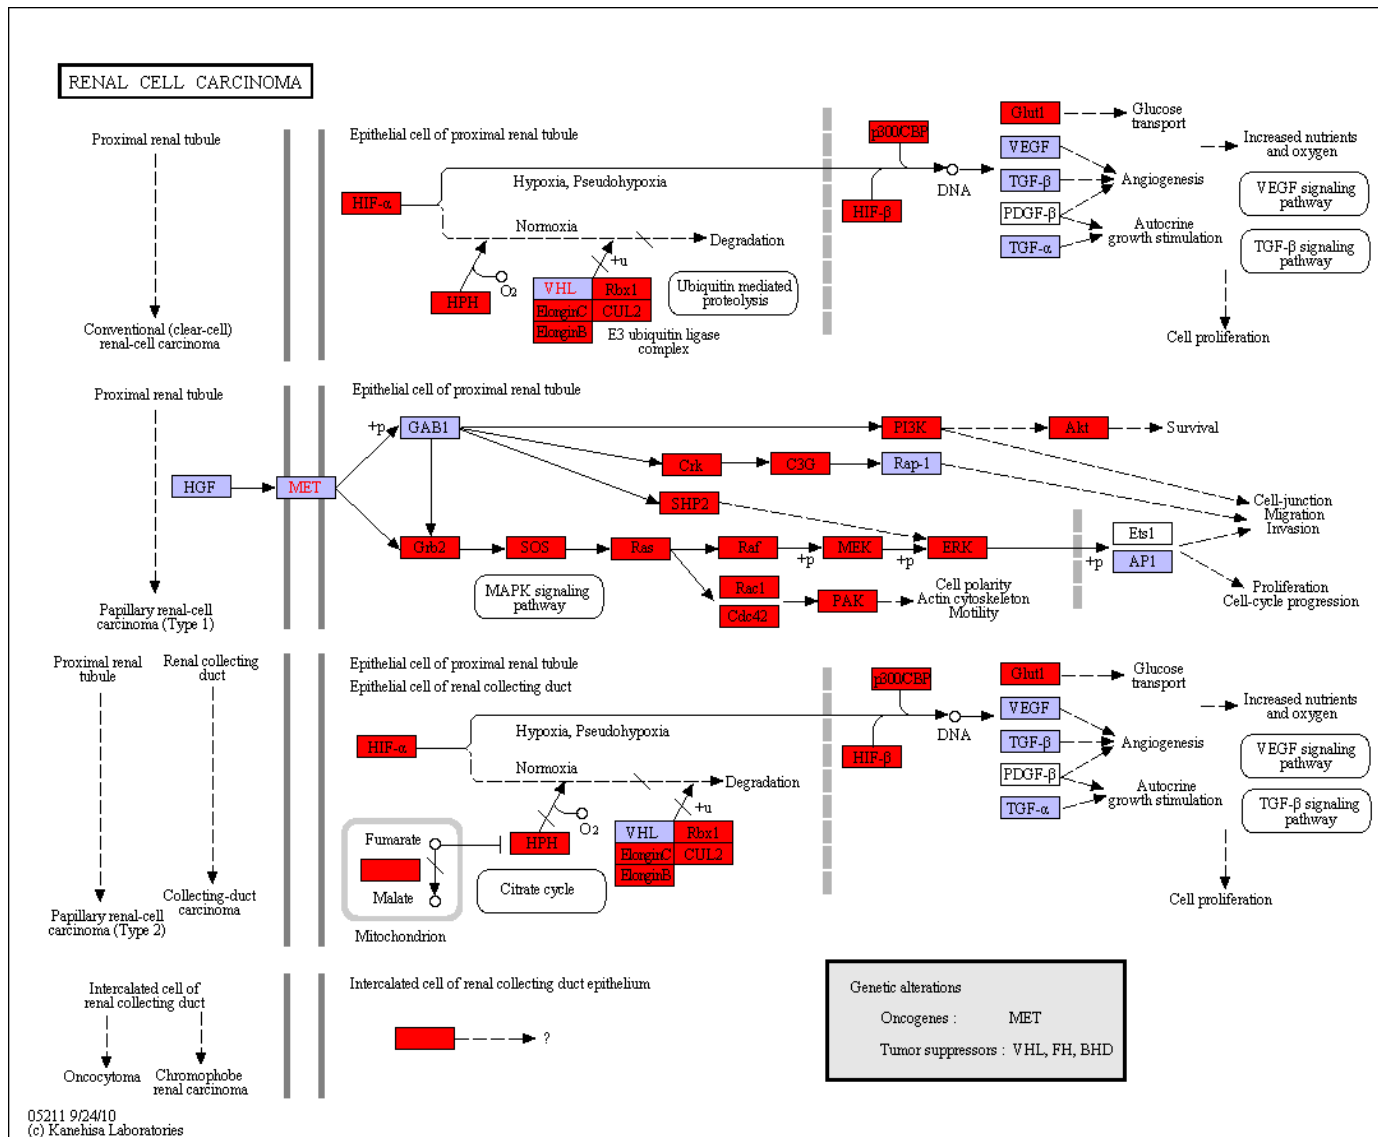

Figure 33: ko05211 Renal cell carcinoma

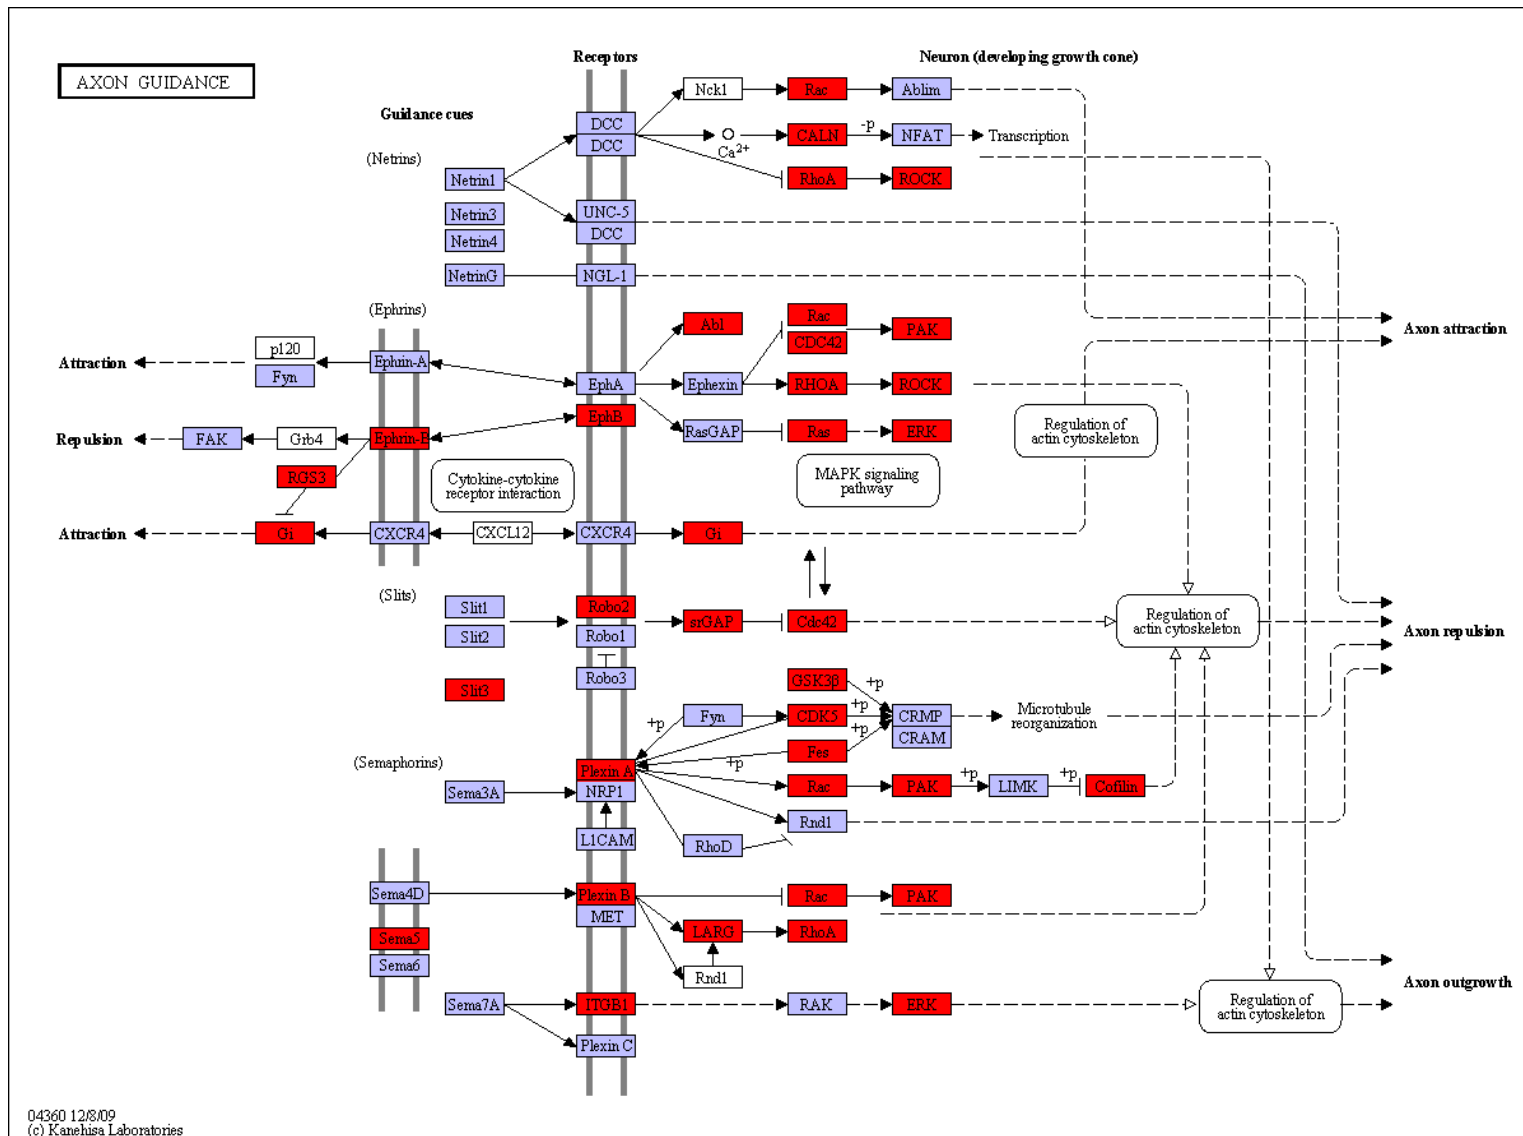

Figure 34: ko04360 Axon guidance

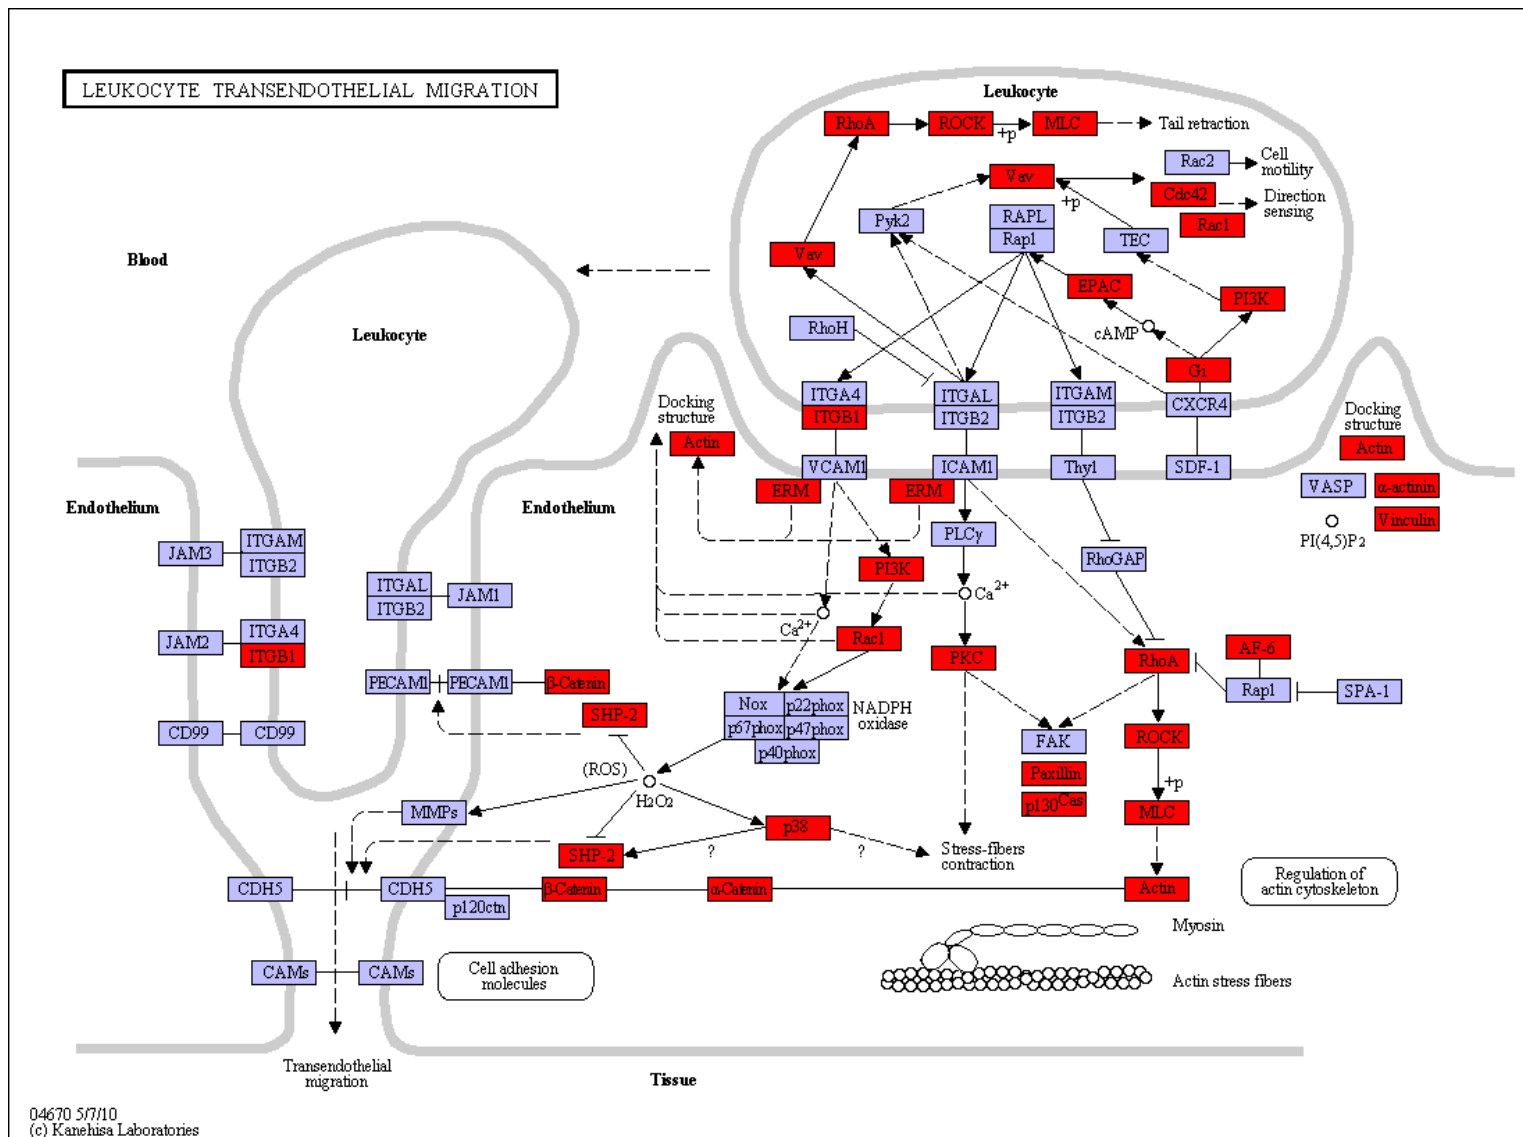

Figure 35: ko04670 Leukocyte transendothelial migration

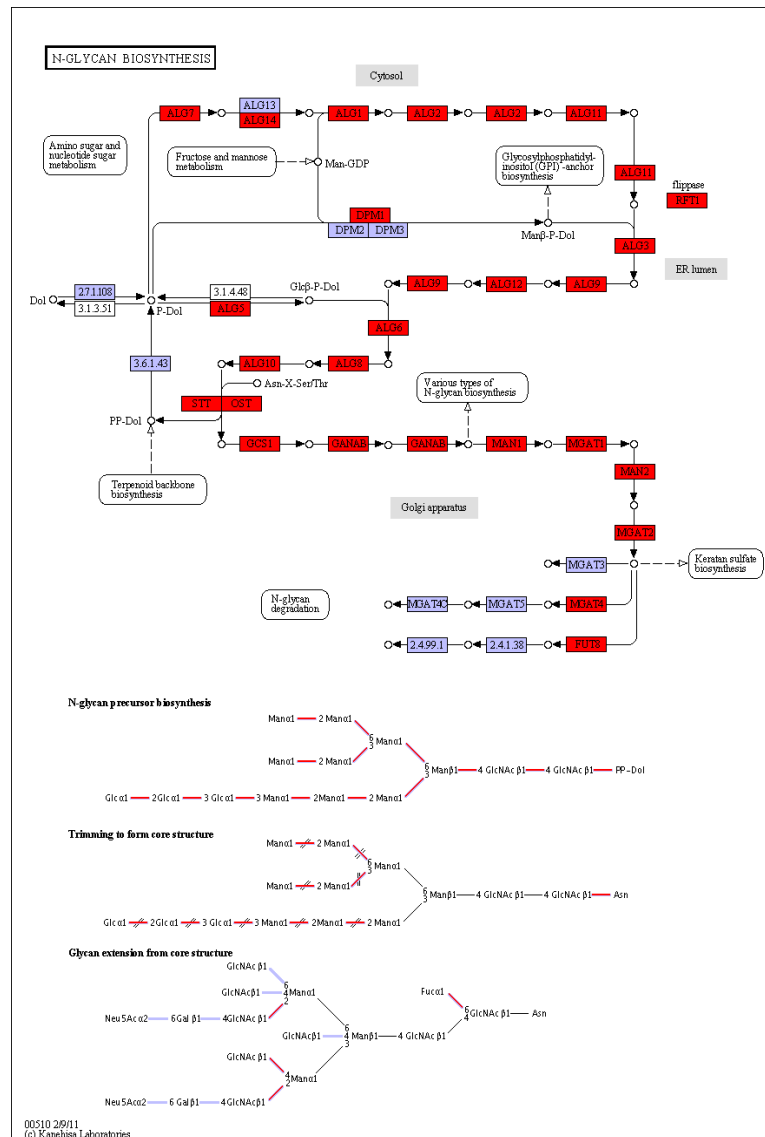

Figure 36: ko00510 N-Glycan biosynthesis

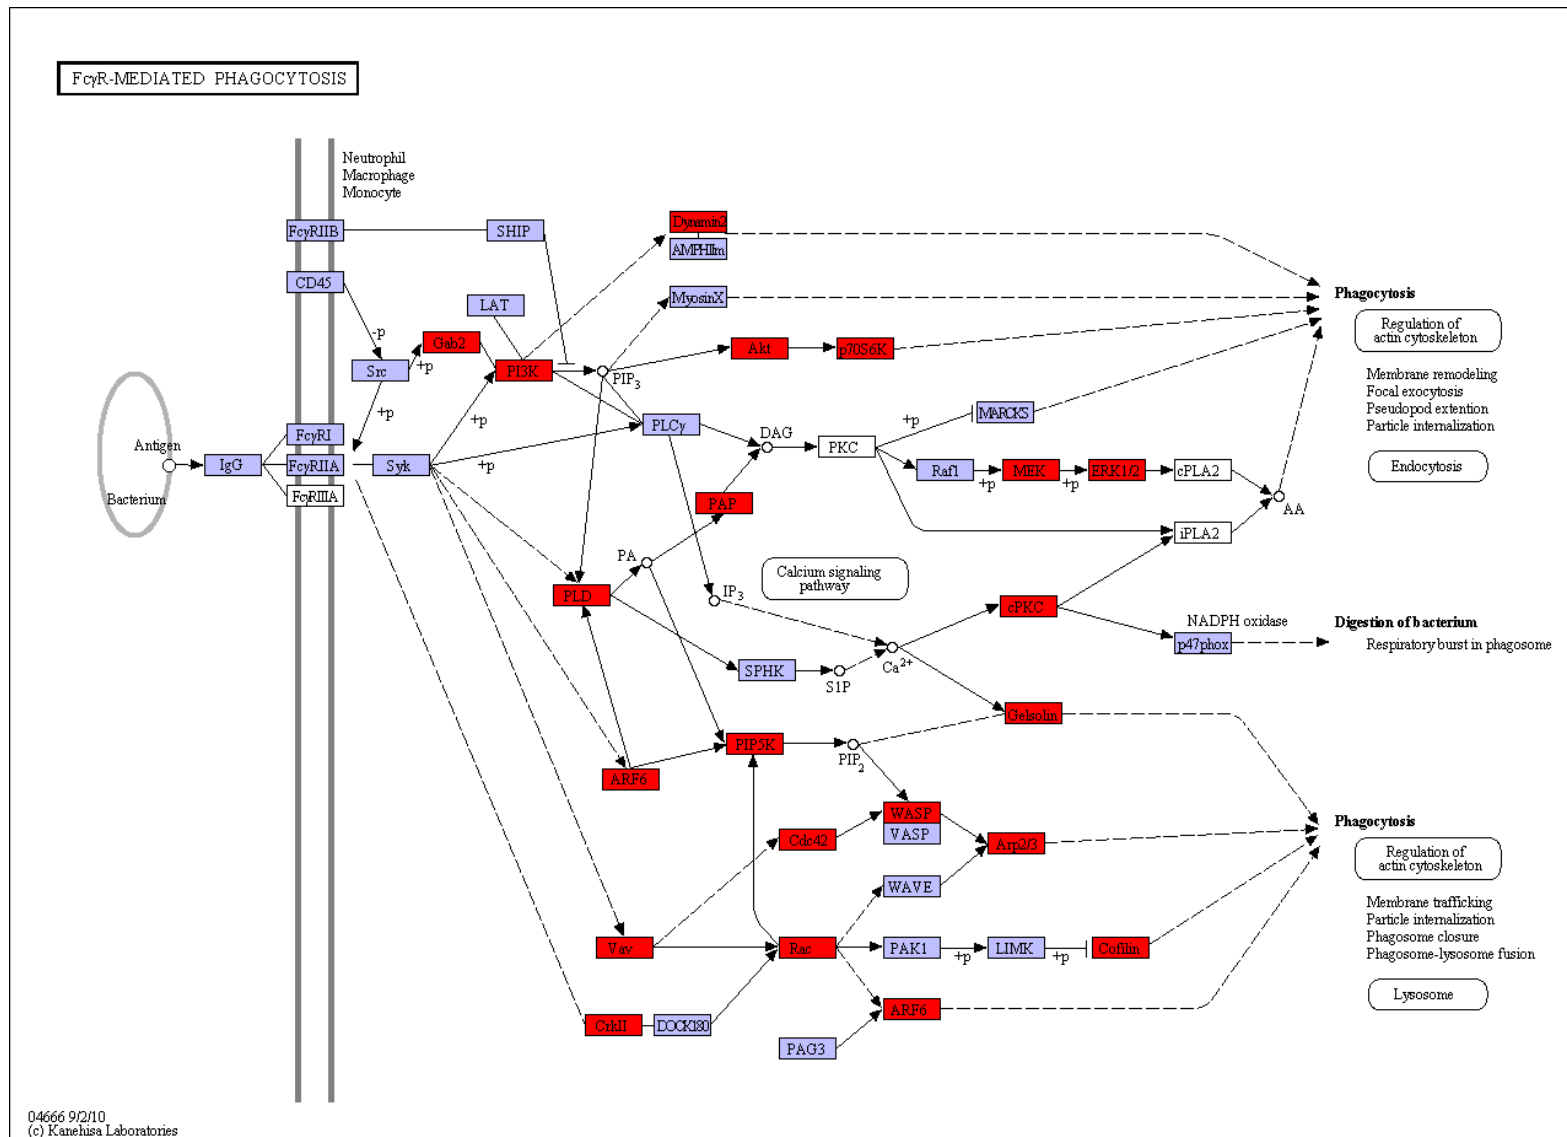

Figure 37: ko04666 Fc gamma R-mediated phagocytosis

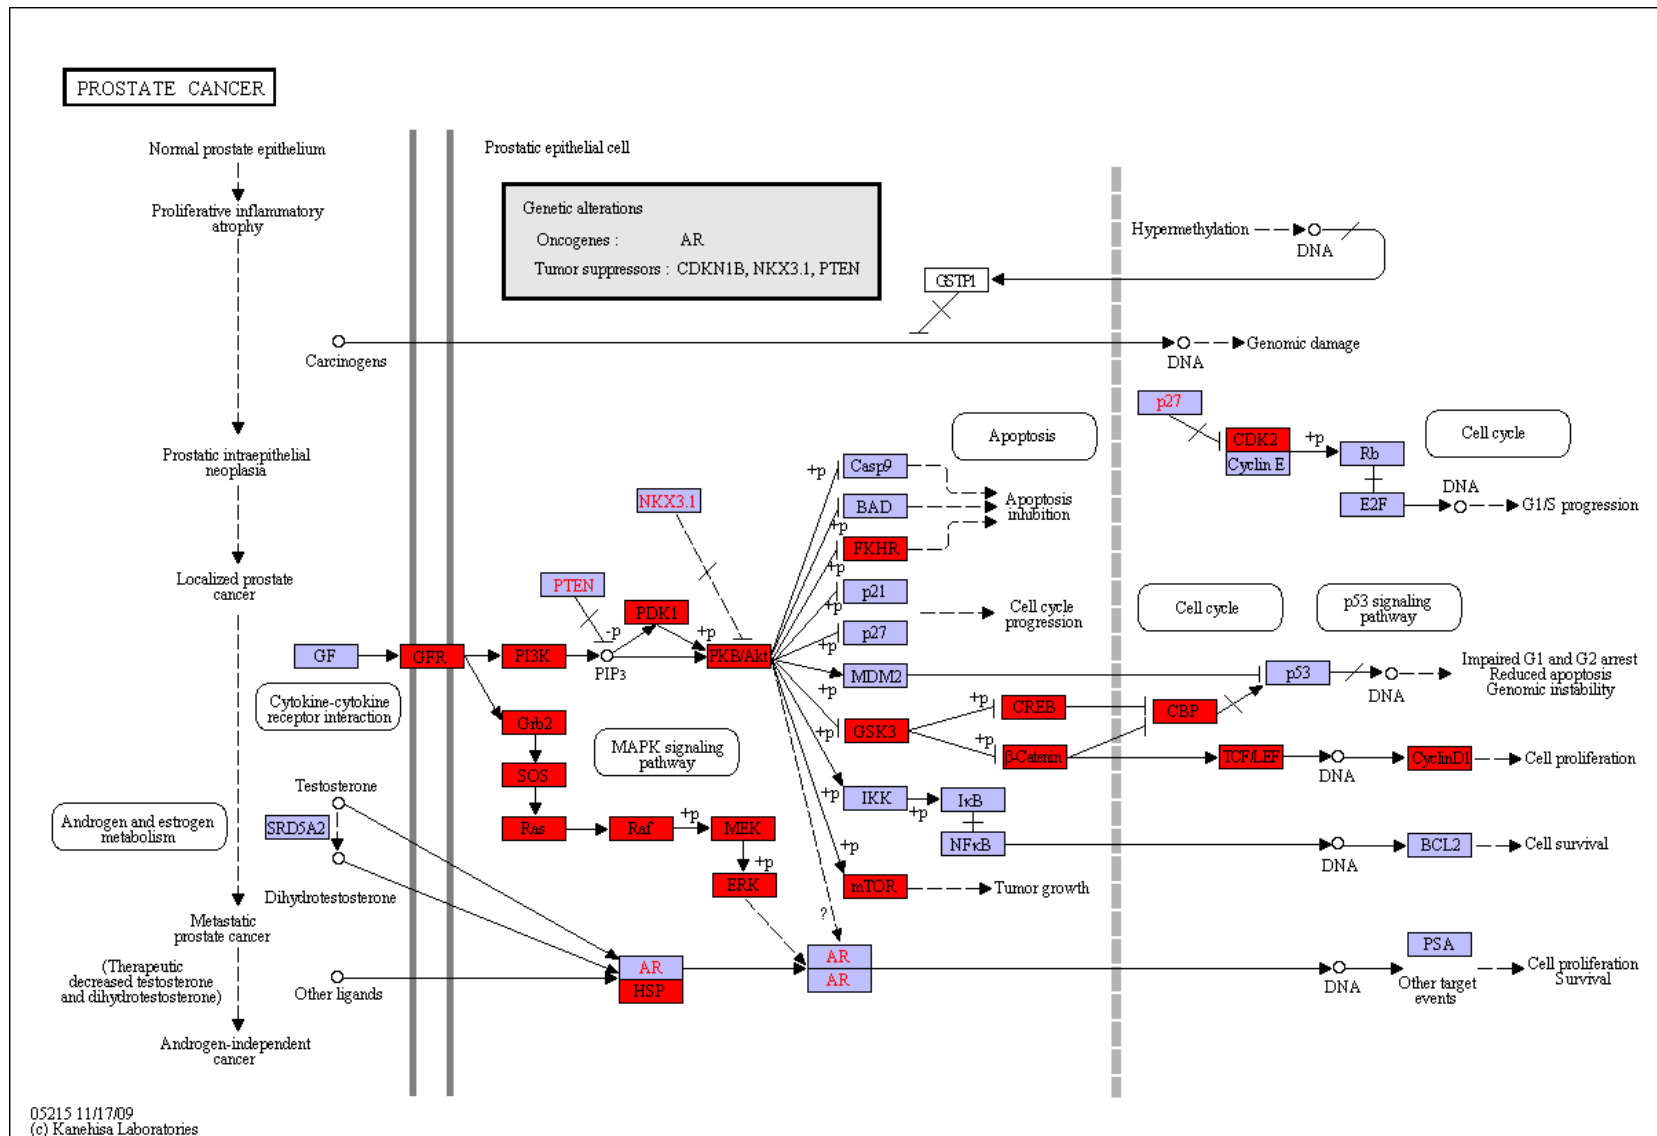

Figure 38: ko05215 Prostate cancer

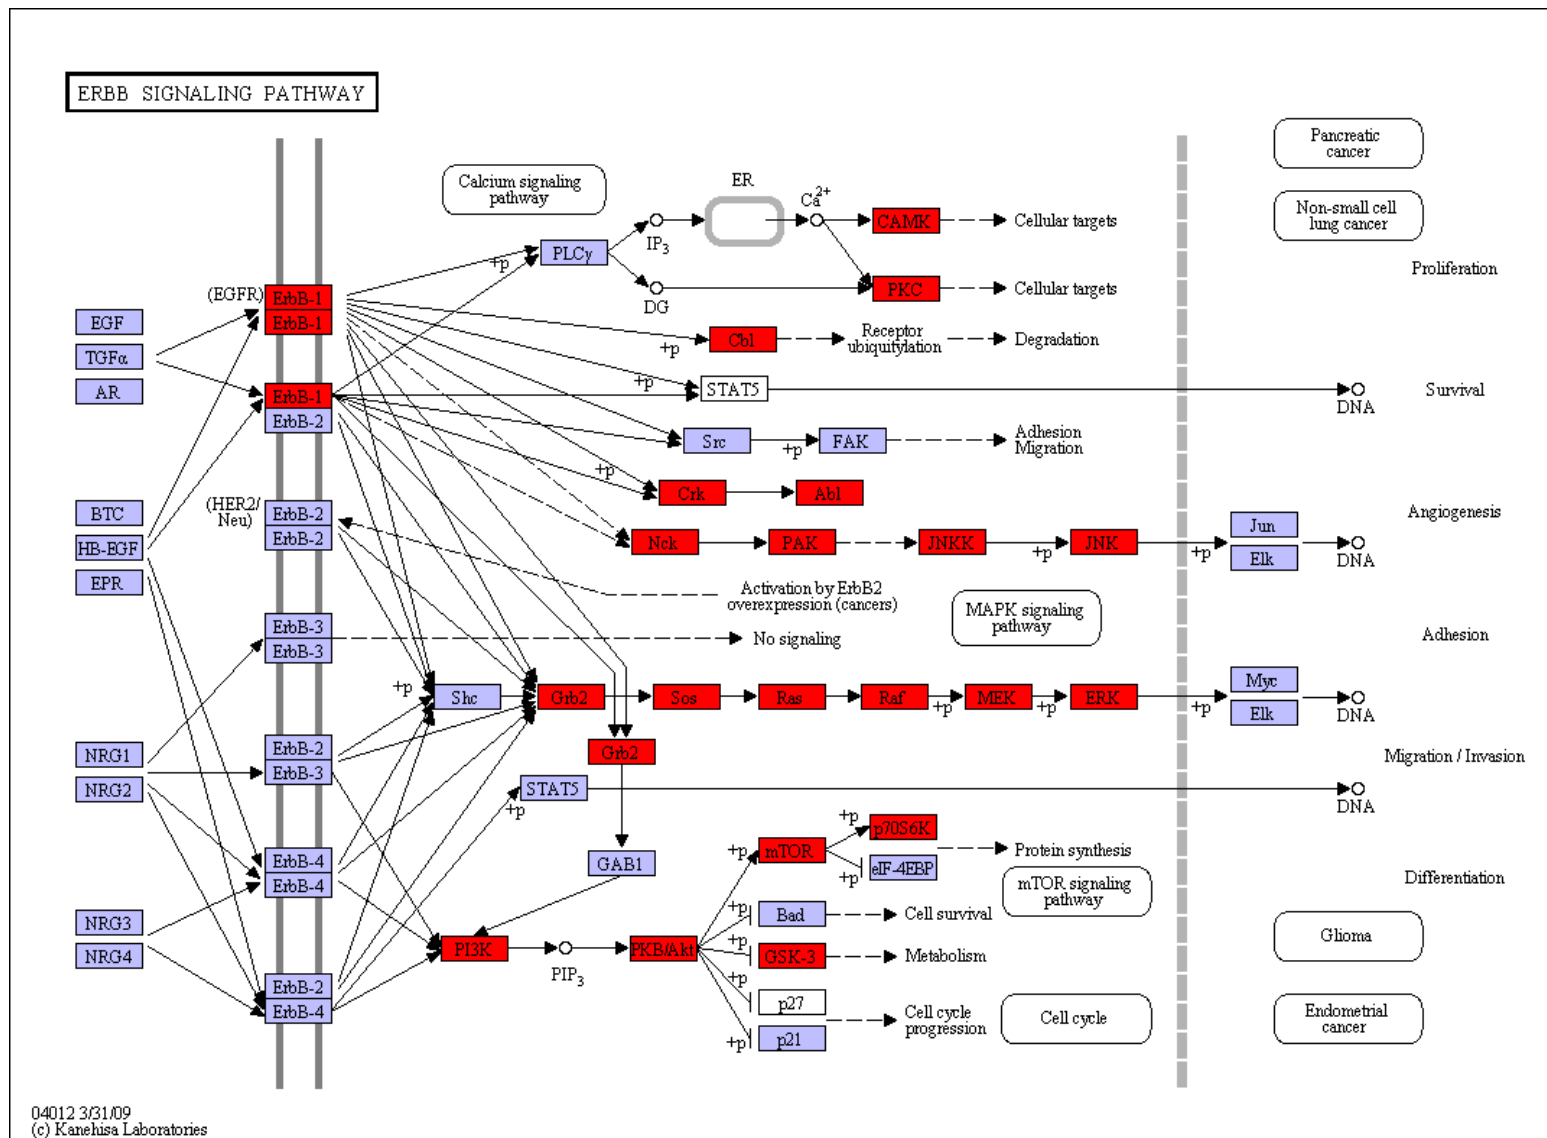

Figure 39: ko04012 ErbB signaling pathway



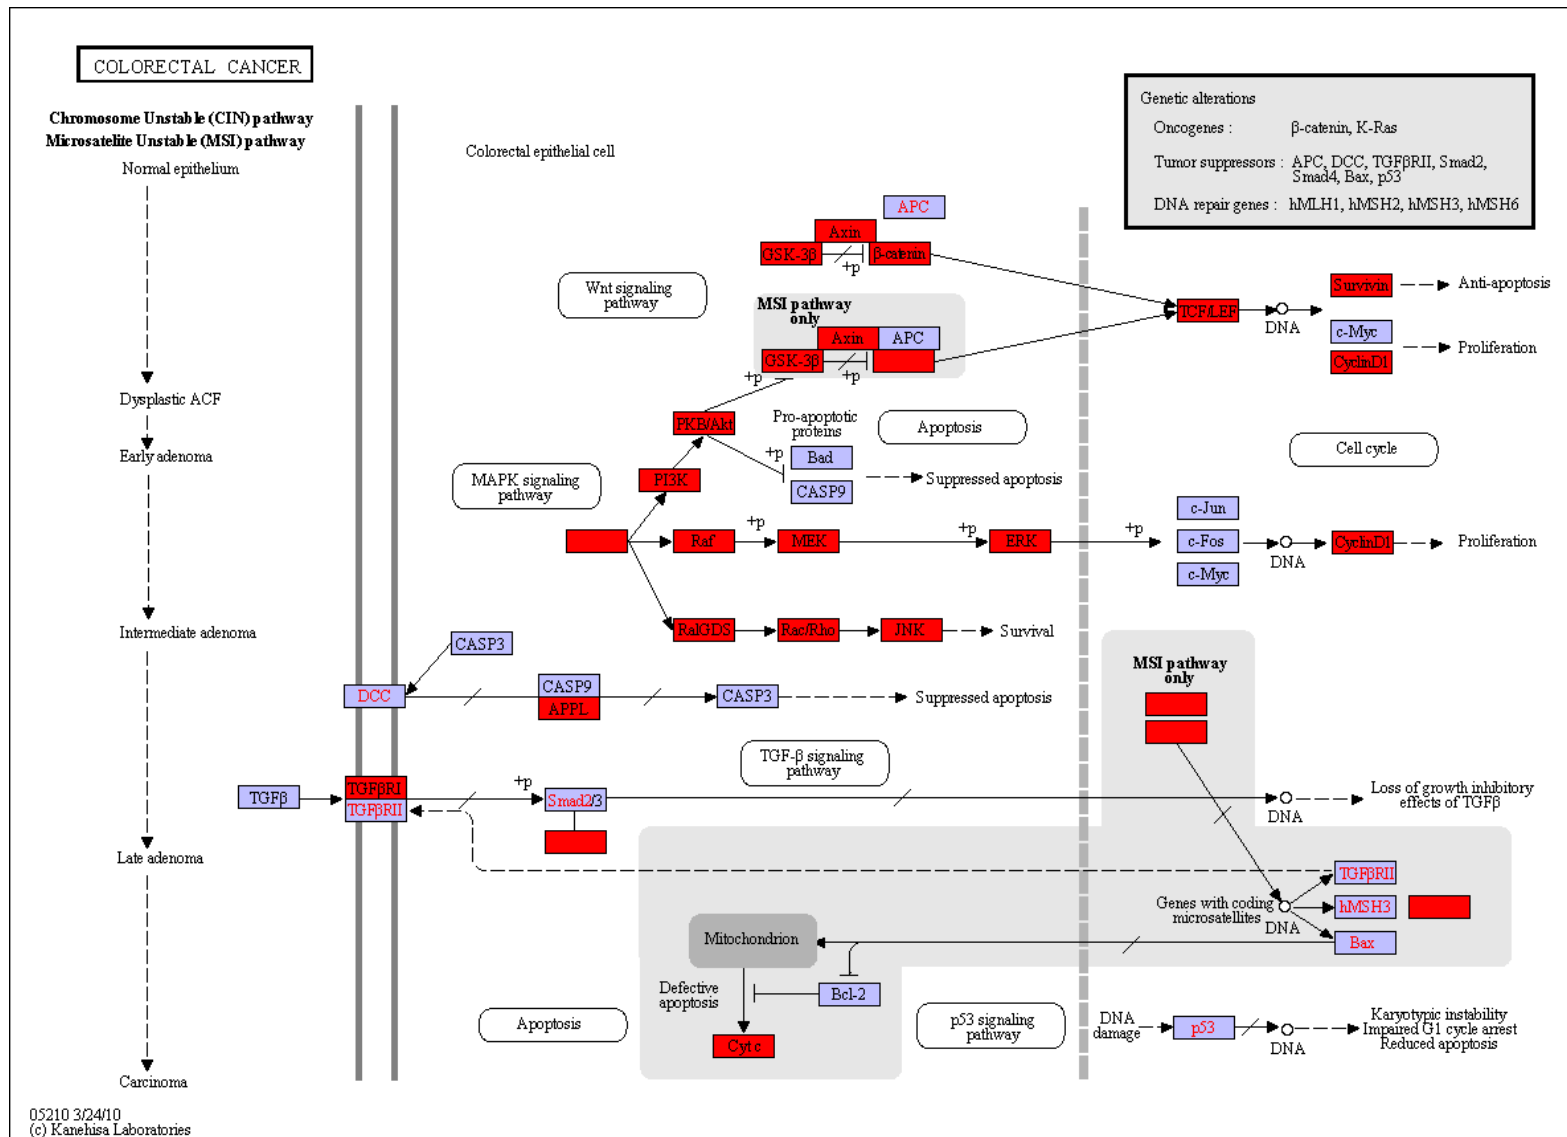

Figure 40: ko05210 Colorectal cancer

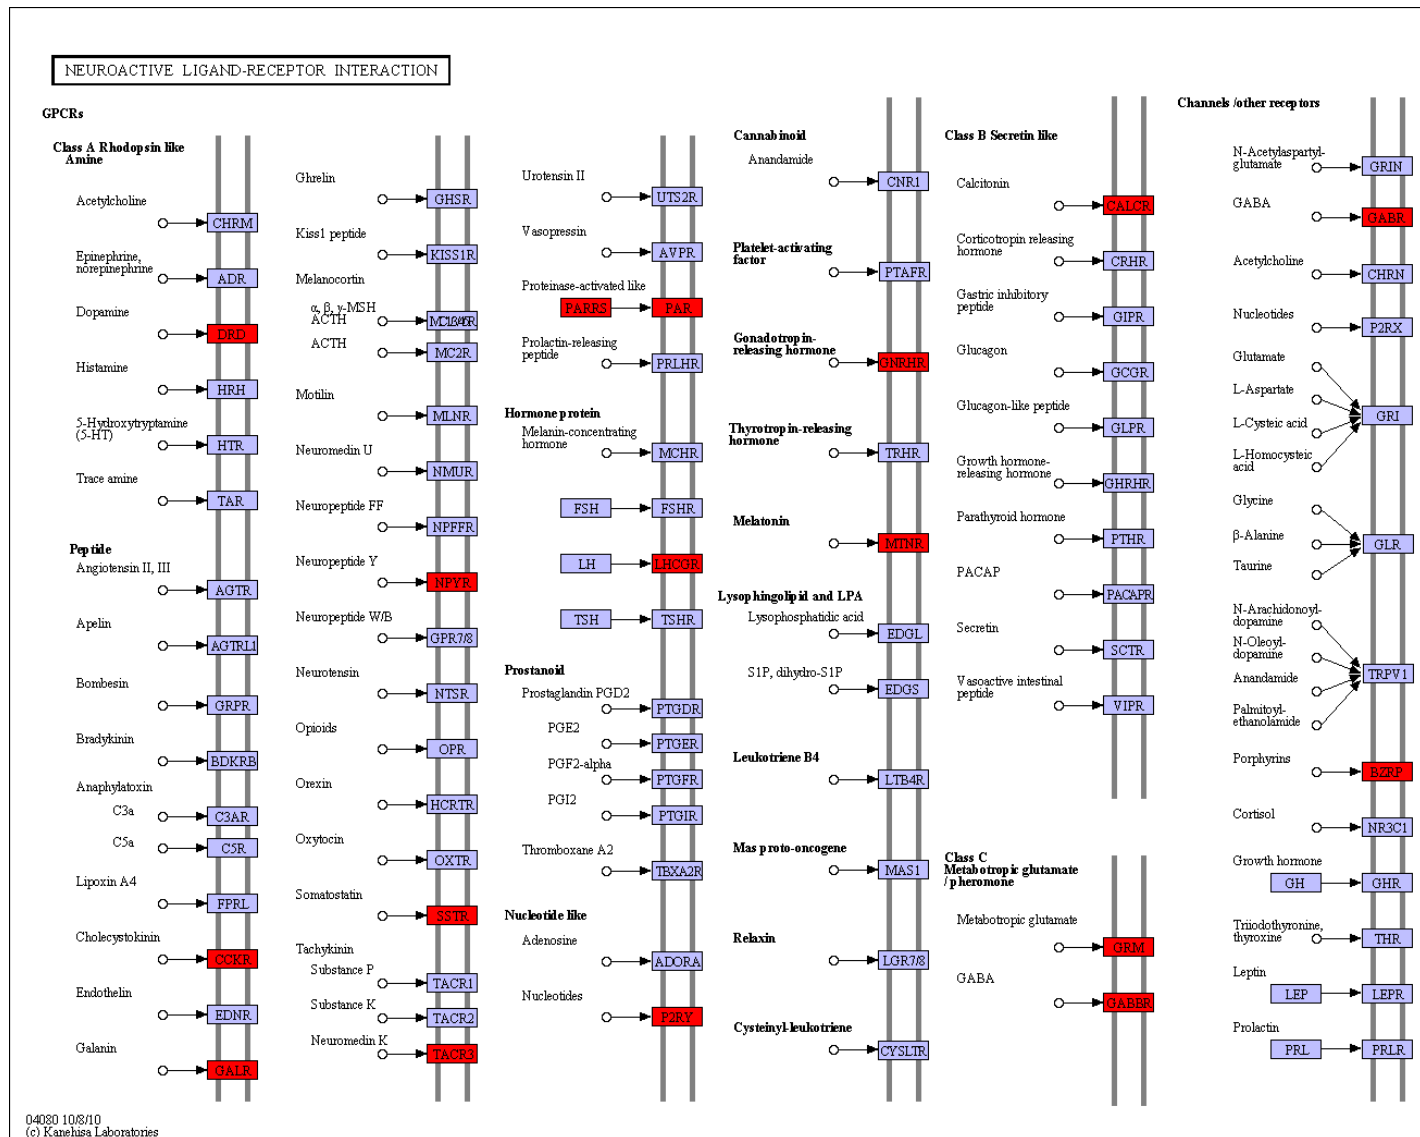

Figure 41: ko04080 Neuroactive ligand-receptor interaction



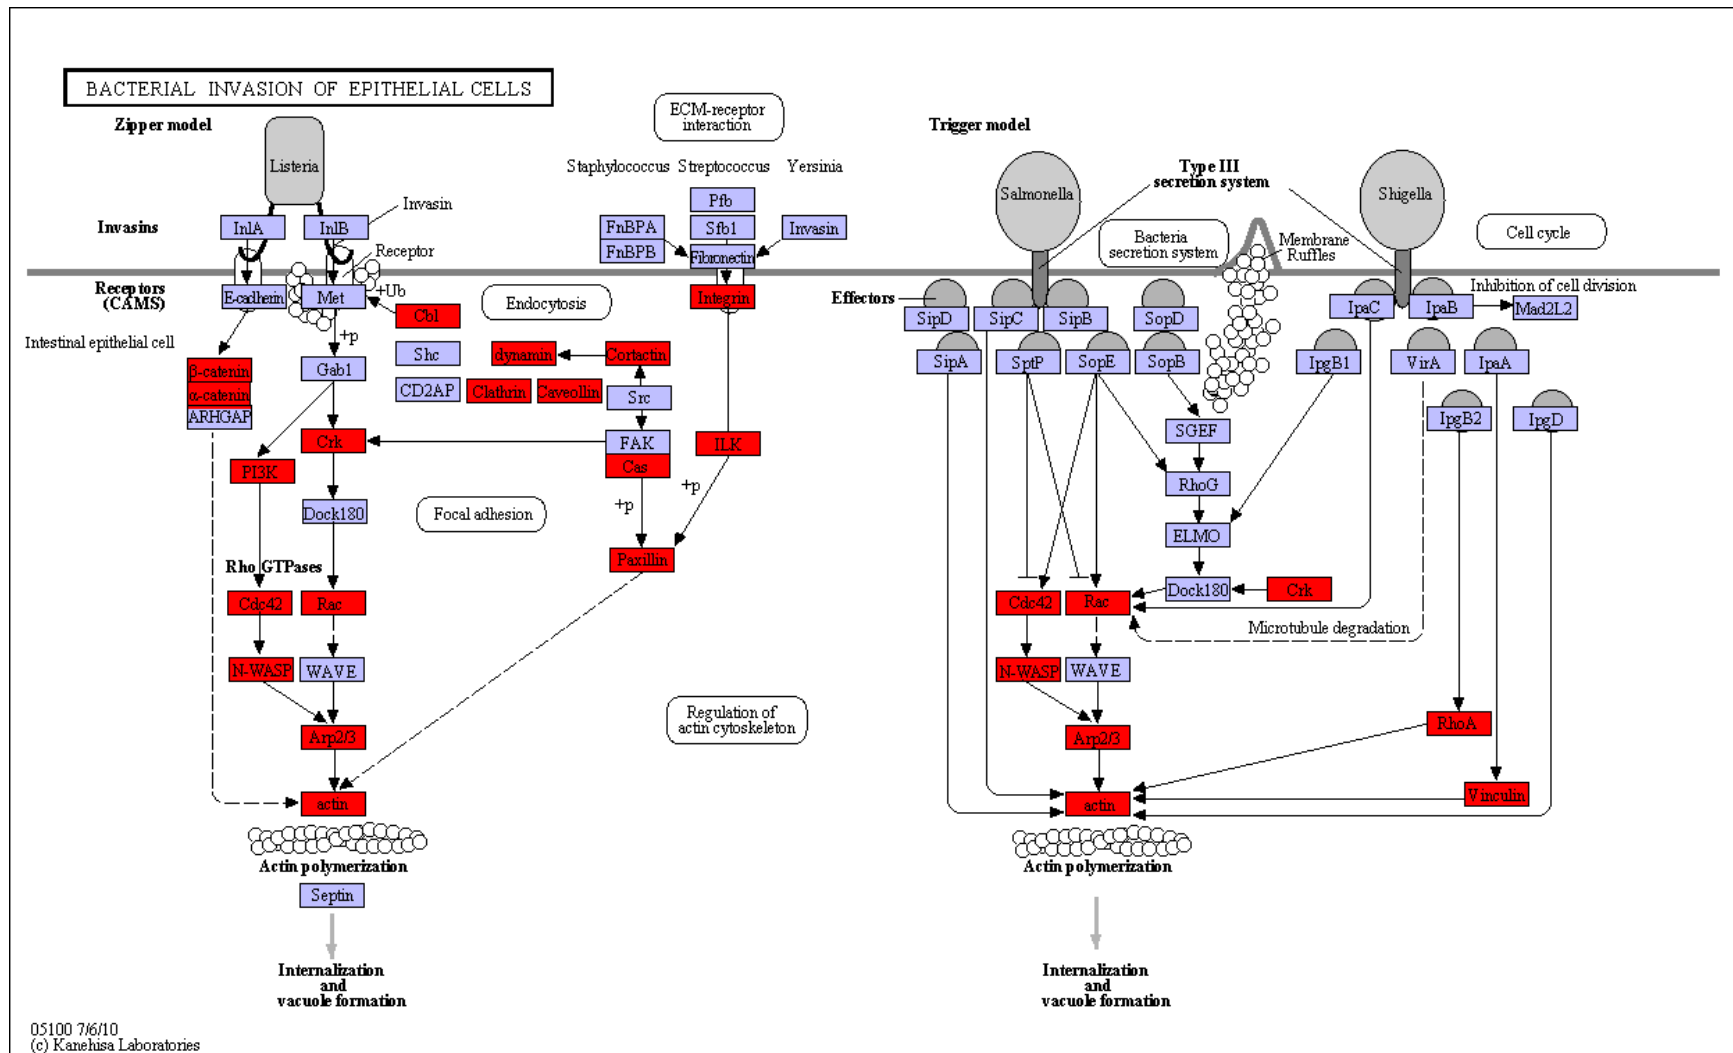

Figure 43: ko05100 Bacterial invasion of epithelial cells



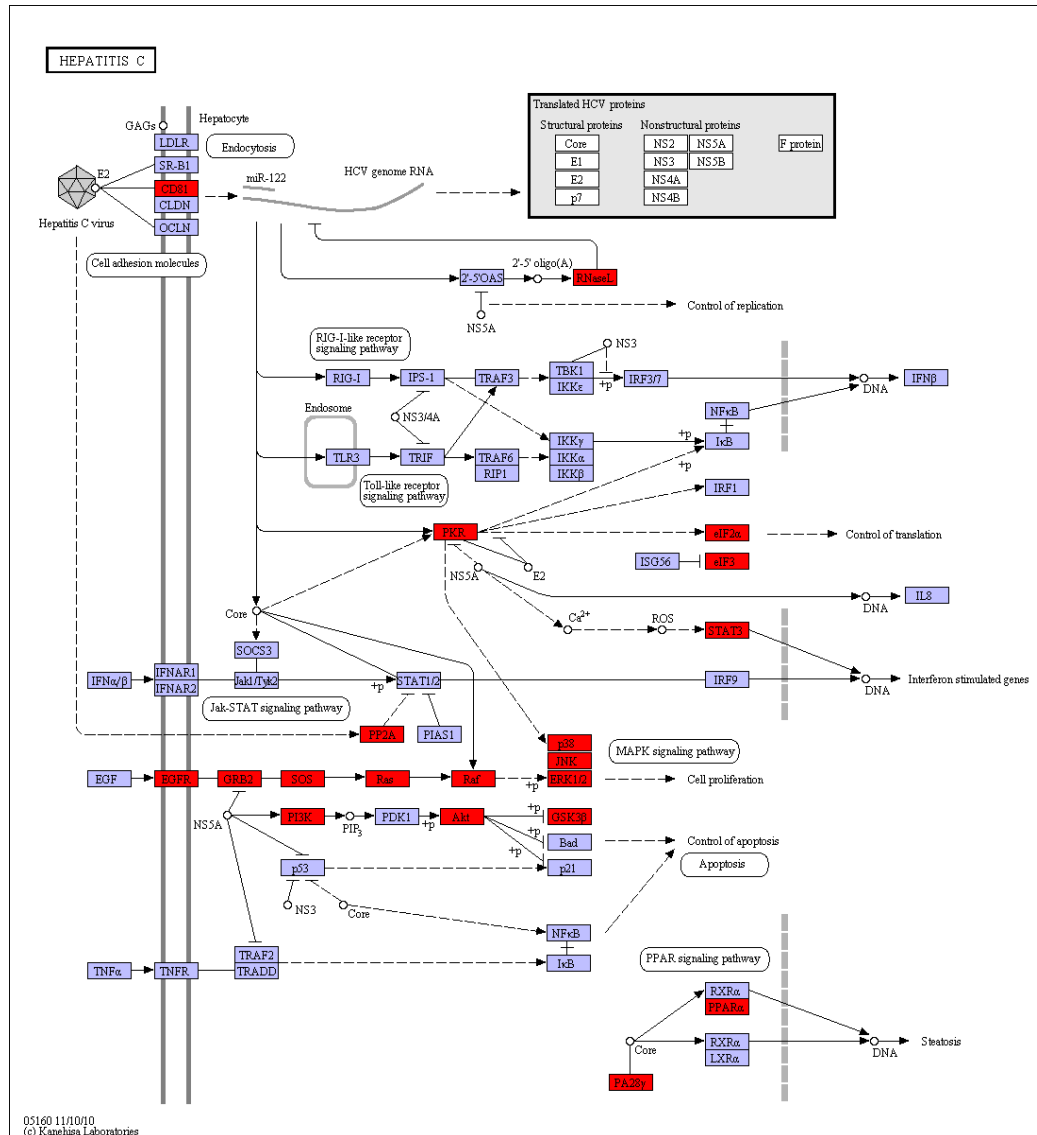

Figure 45: ko05160 Hepatitis C

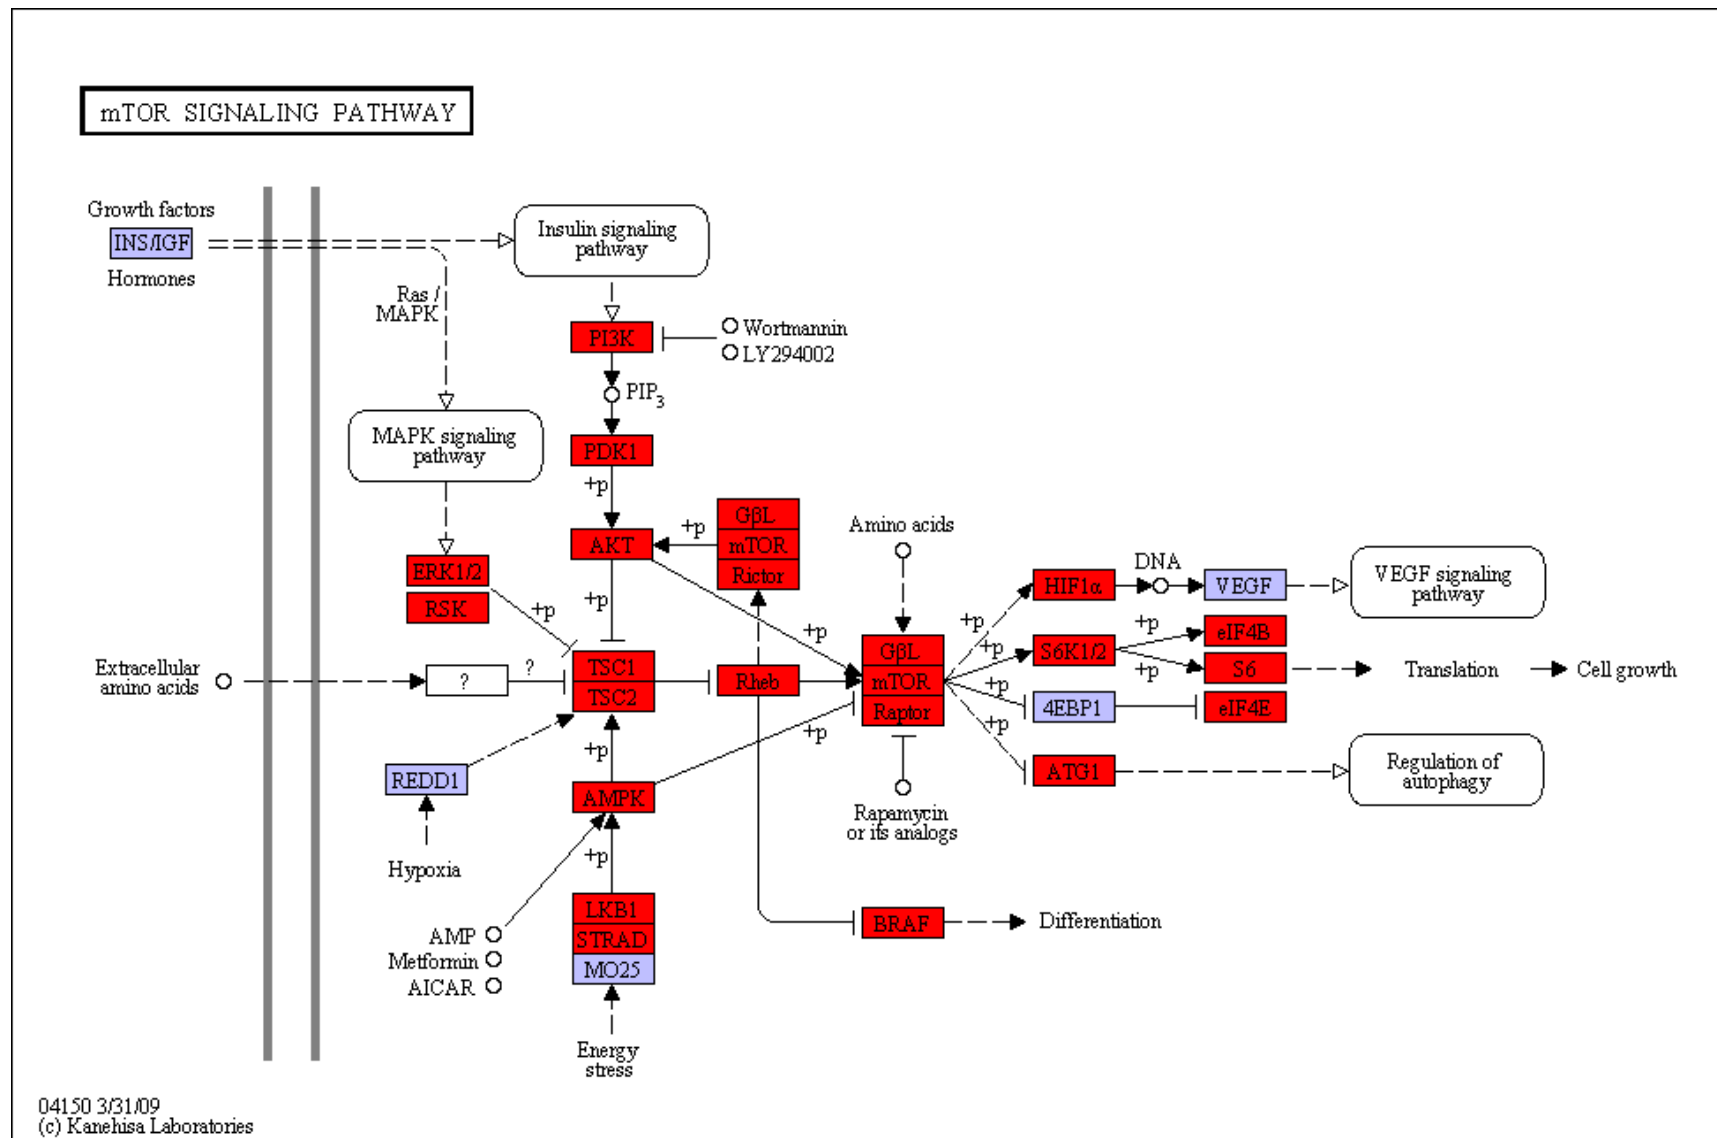

Figure 46: ko04150 mTOR signaling pathway

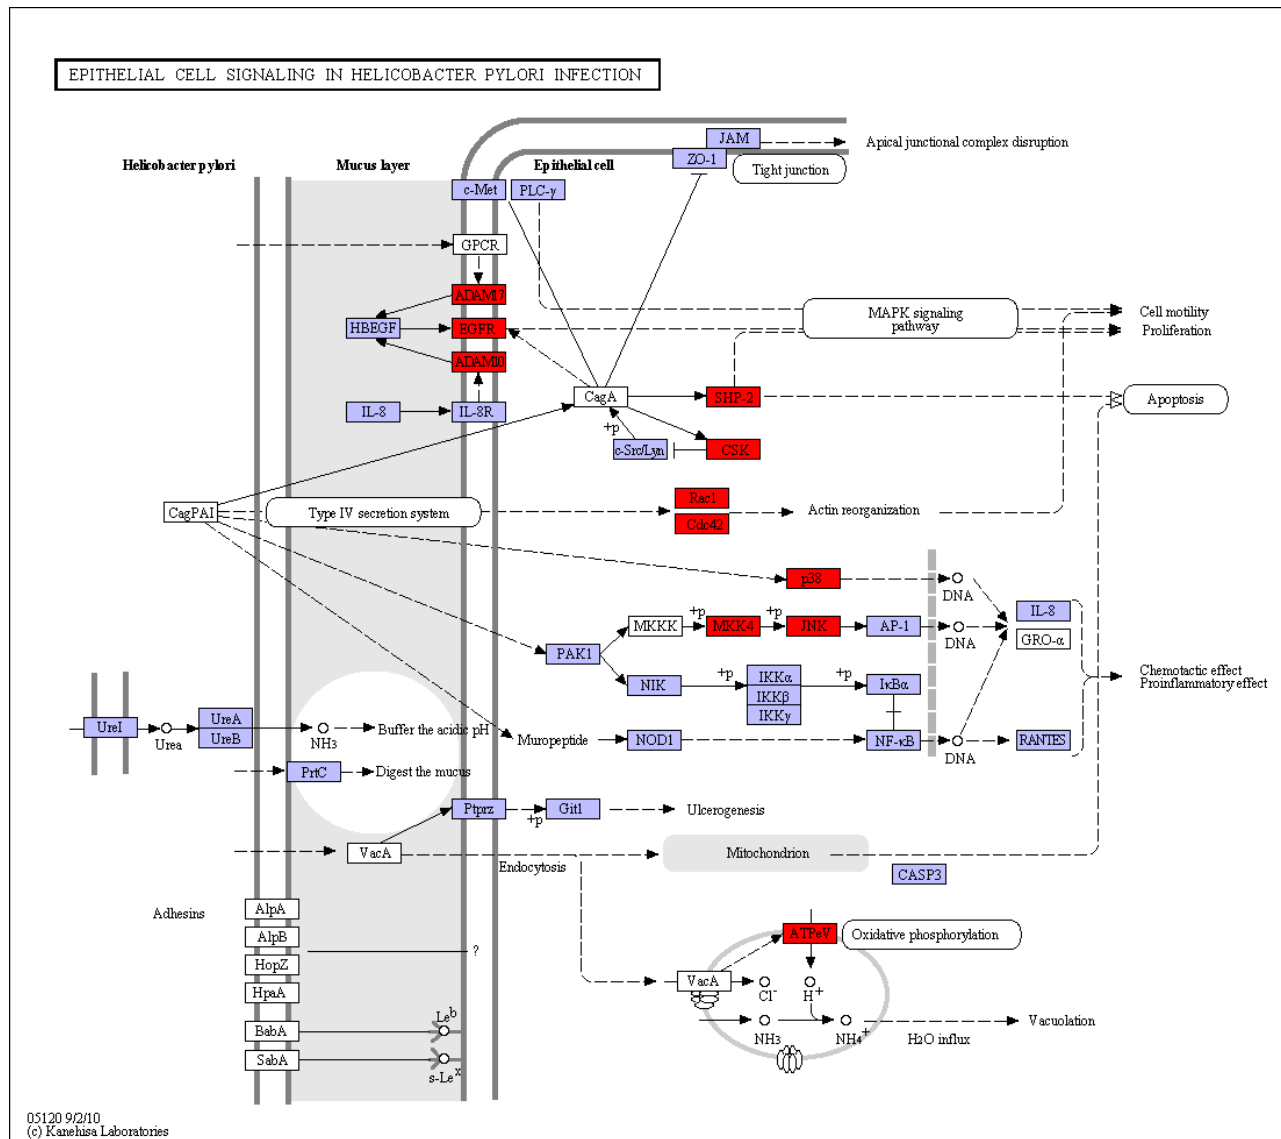

Figure 47: ko05120 Epithelial cell signaling in *Helicobacter pylori* infection



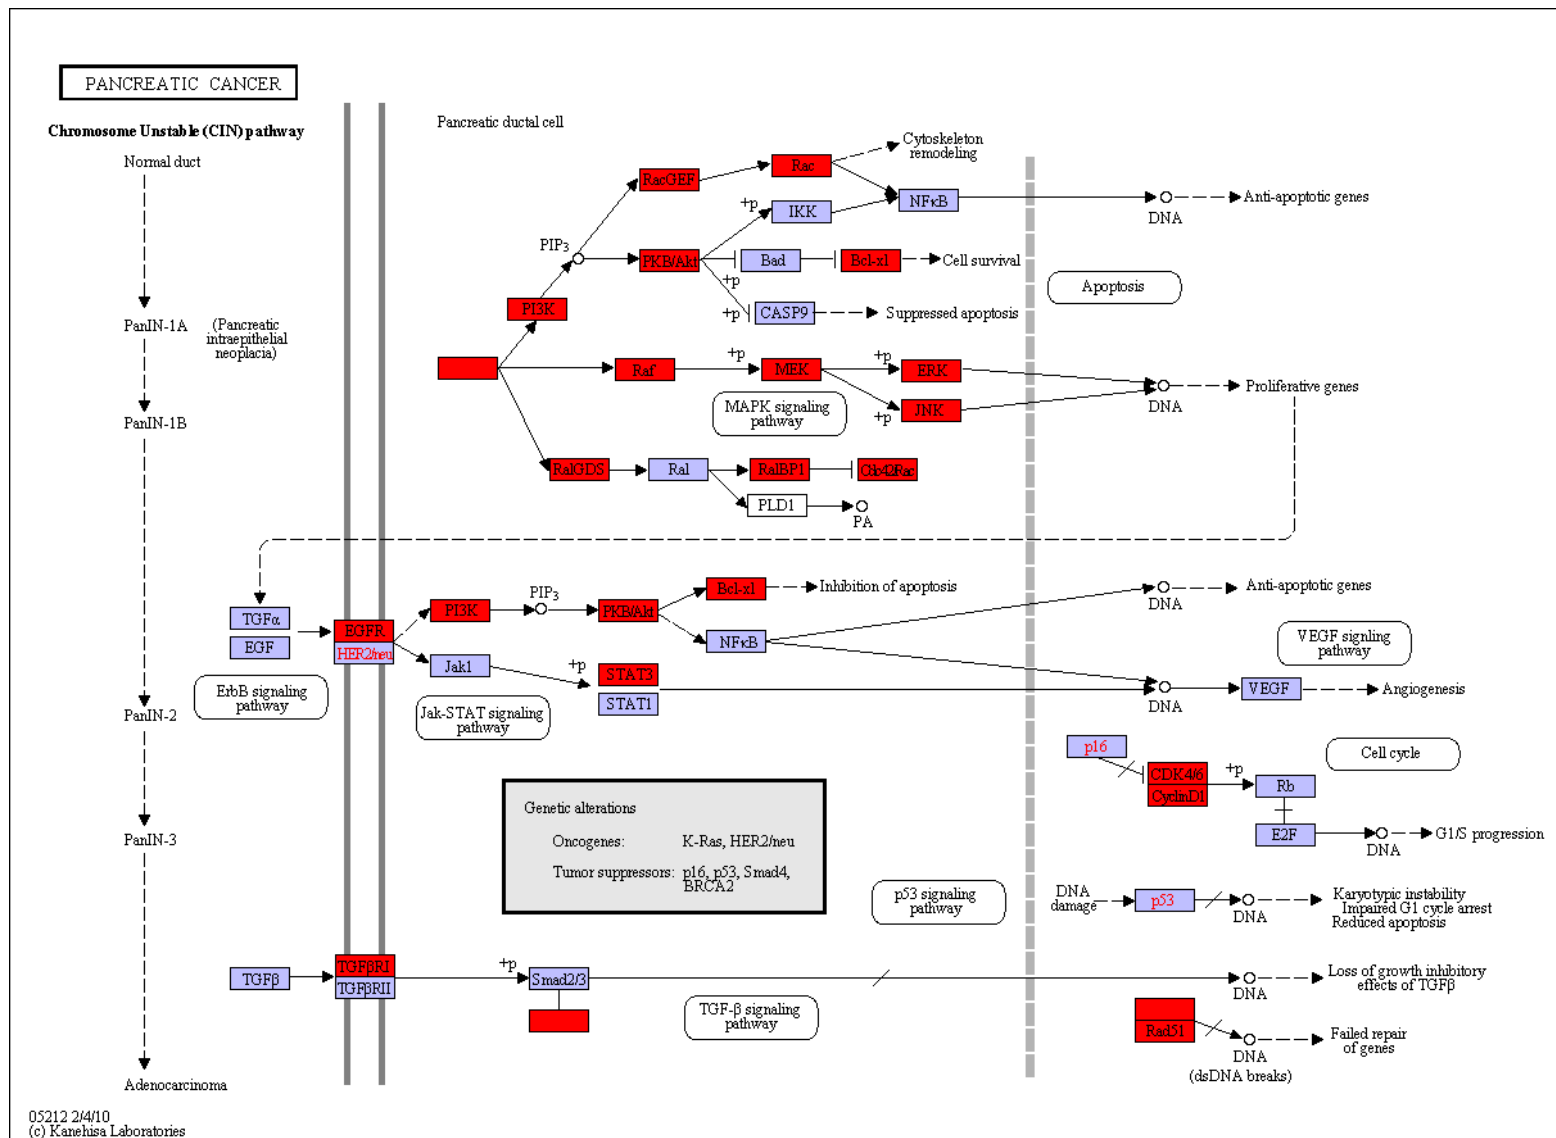

Figure 48: ko05212 Pancreatic cancer

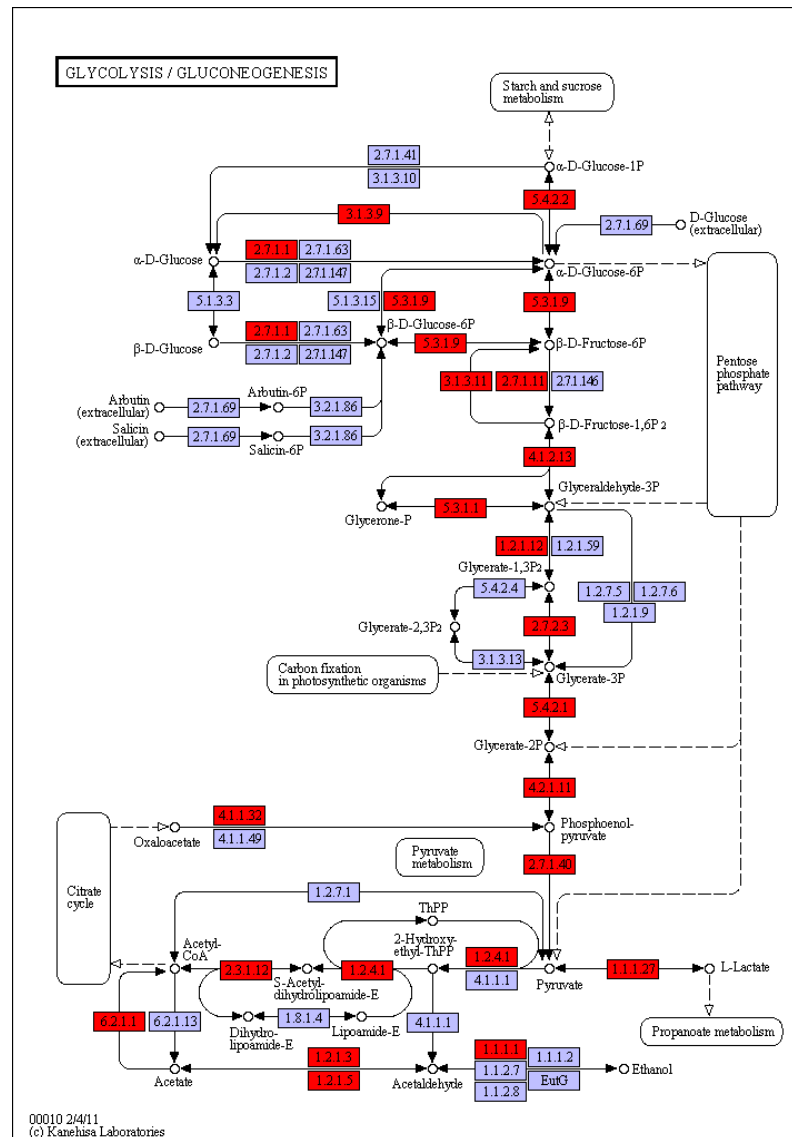

Figure 49: ko00010 Glycolysis / Gluconeogenesis

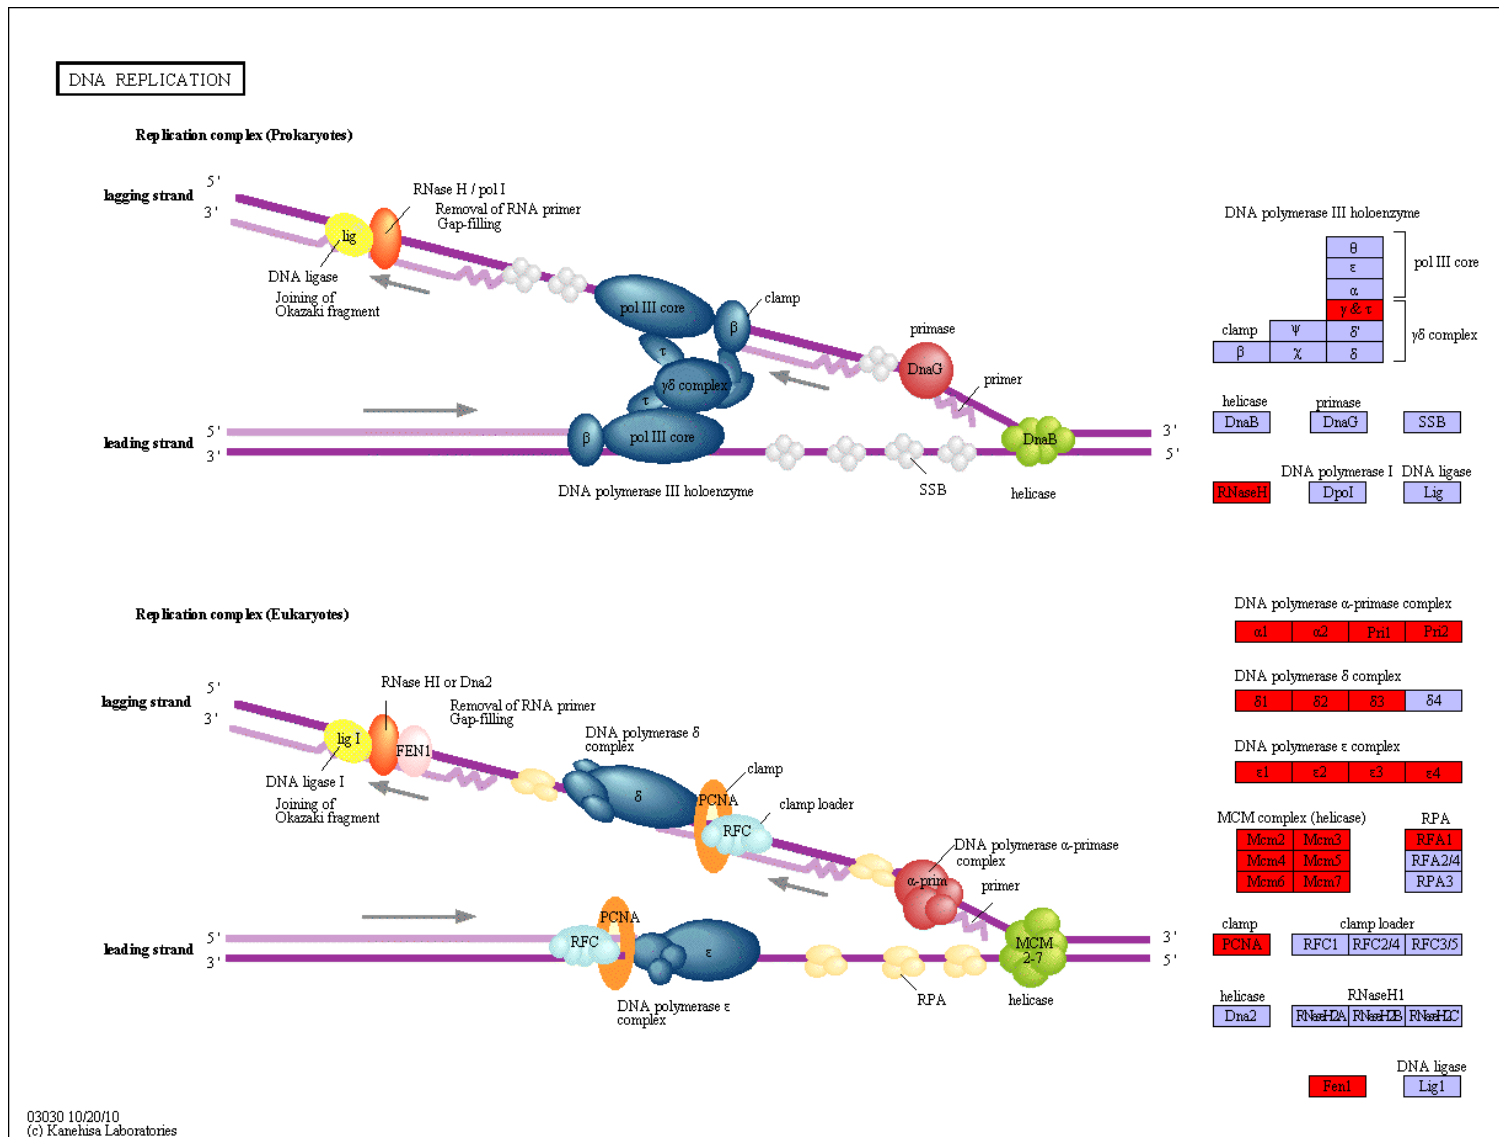

Figure 50: ko03030 DNA replication



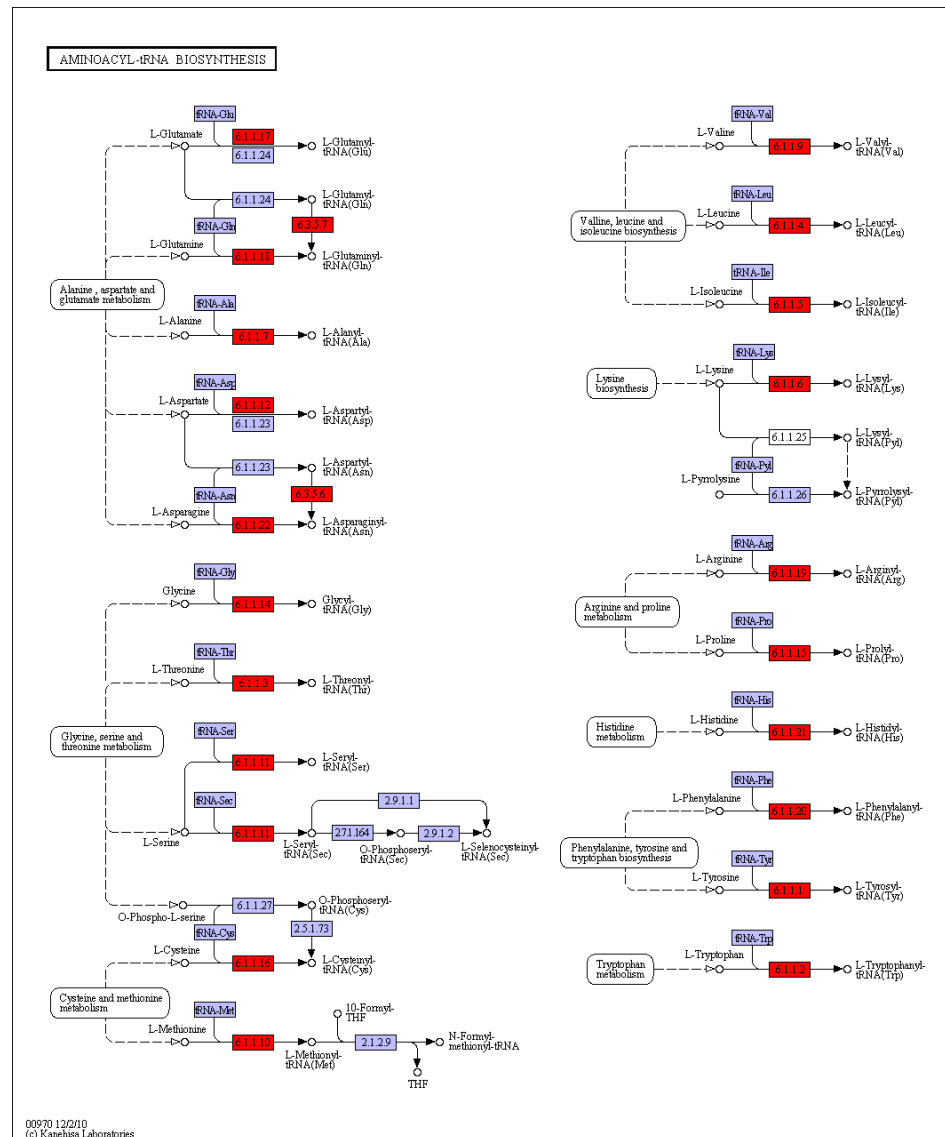

Figure 52: ko00970 Aminoacyl-tRNA biosynthesis

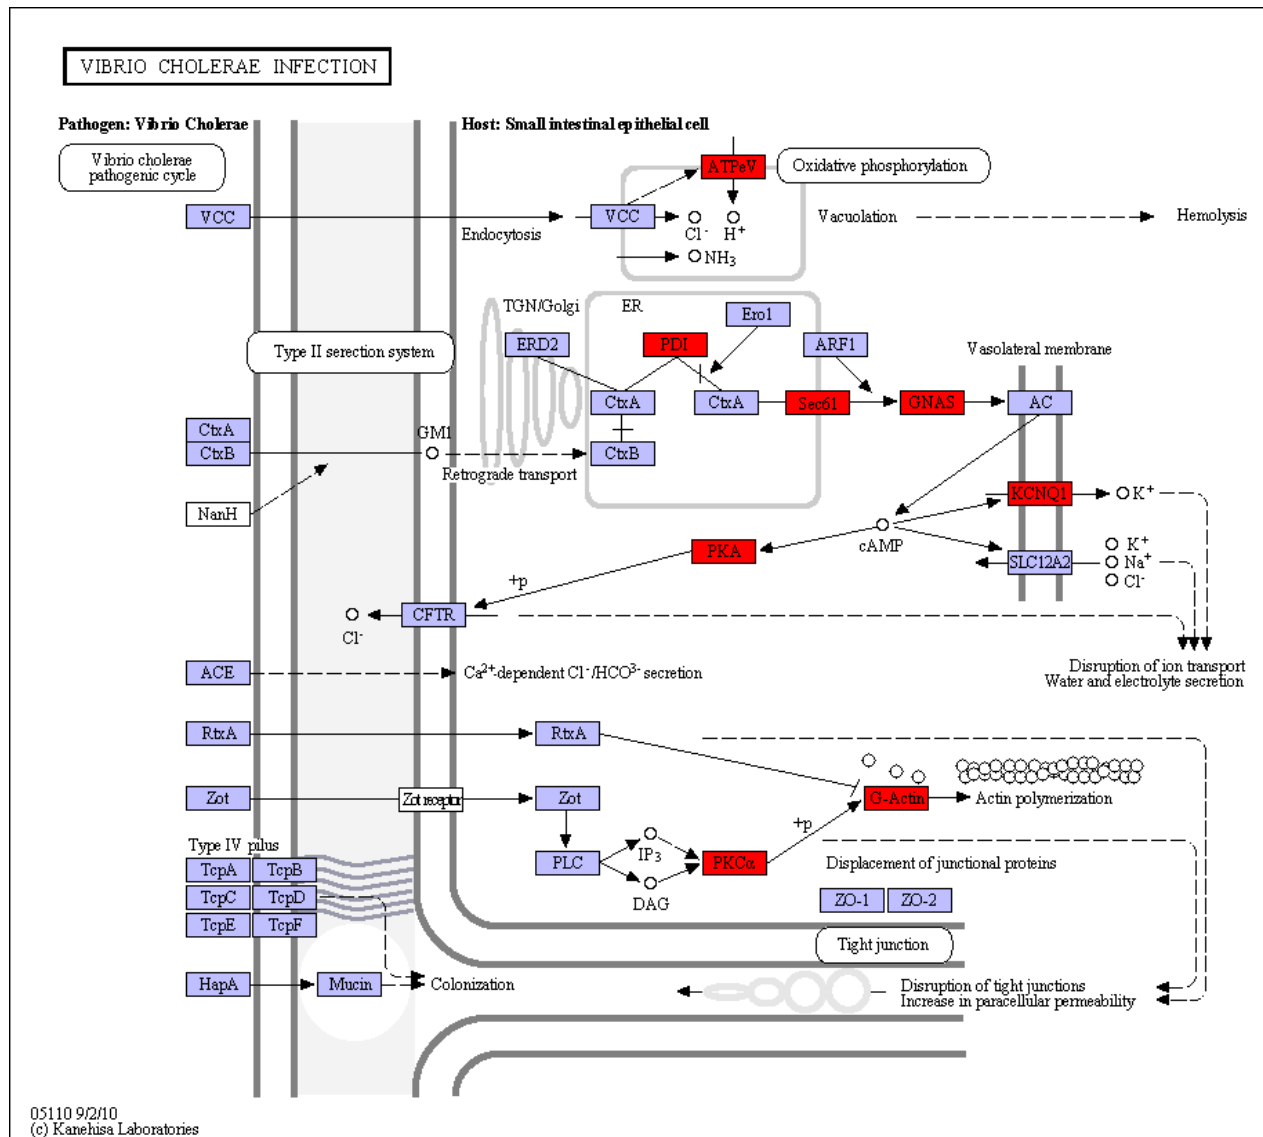

Figure 53: ko05110 *Vibrio cholerae* infection

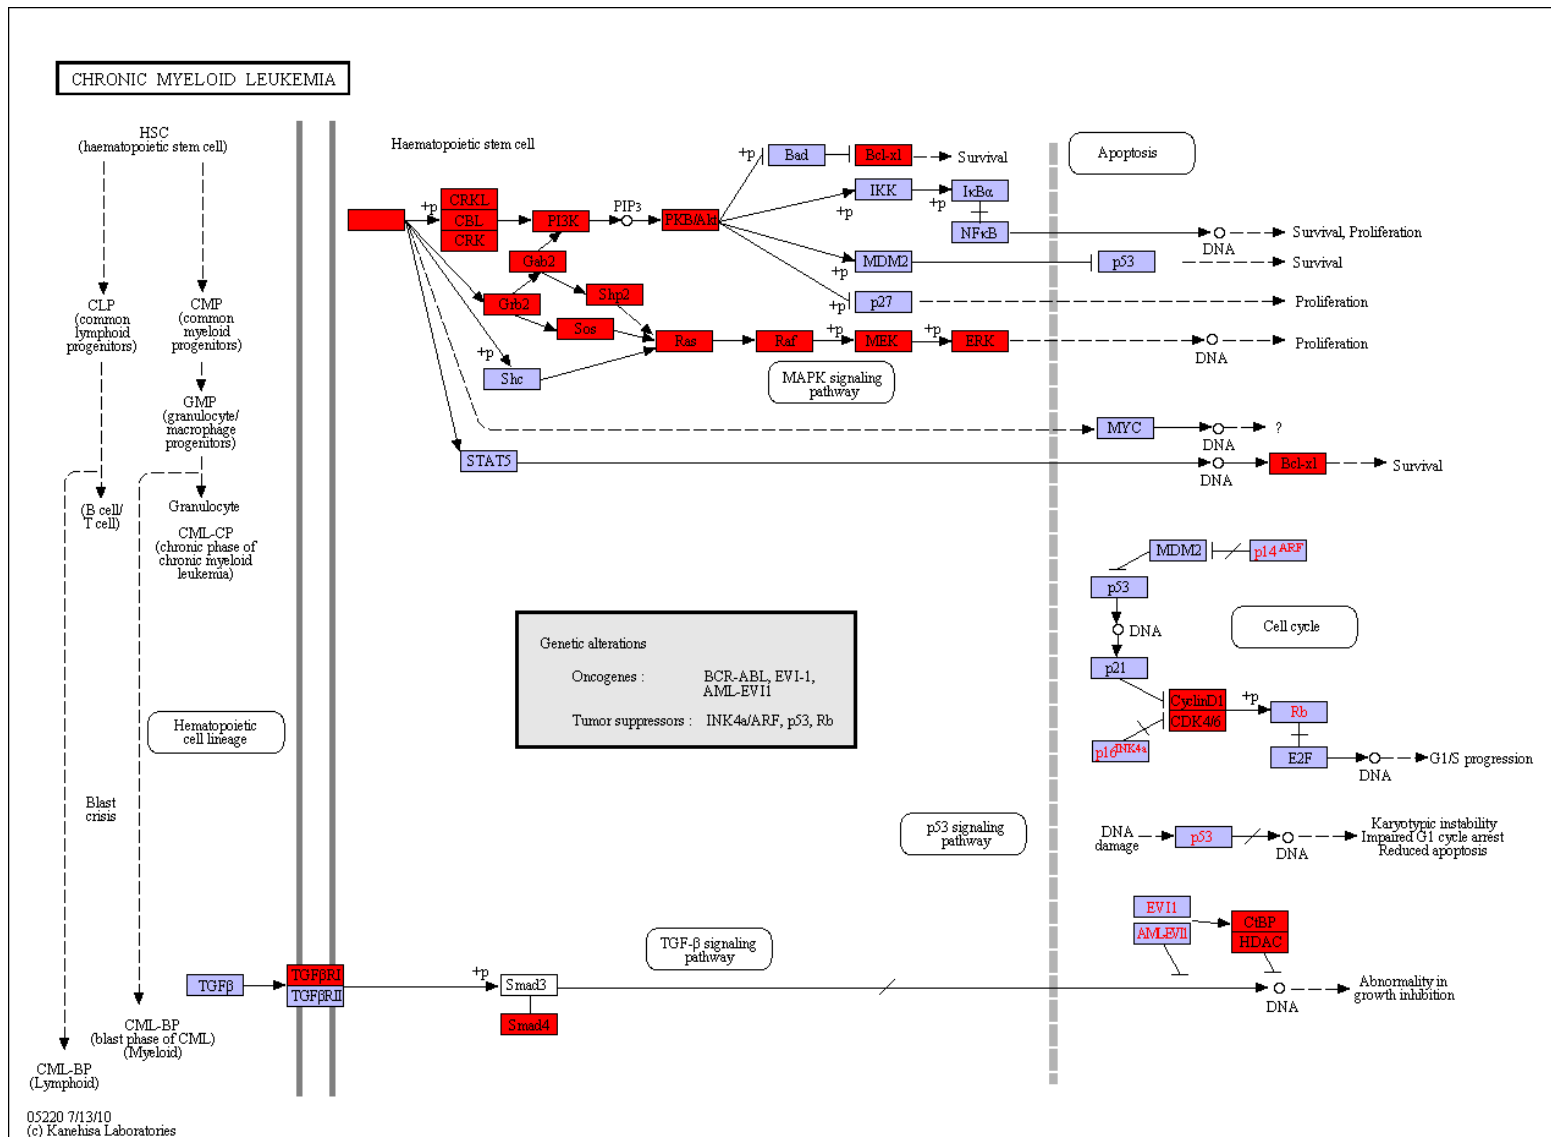

Figure 54: ko05220 Chronic myeloid leukemia

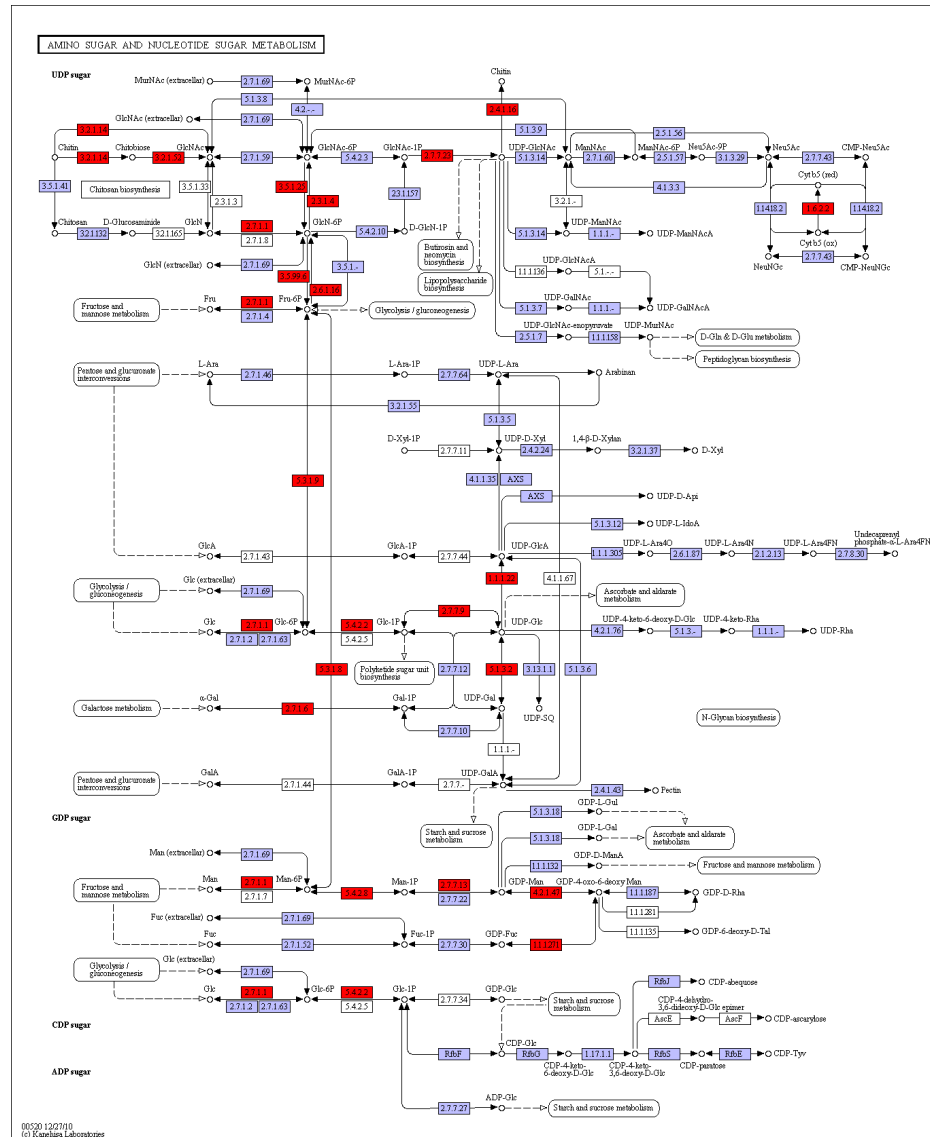

Figure 55: ko00520 Amino sugar and nucleotide sugar metabolism



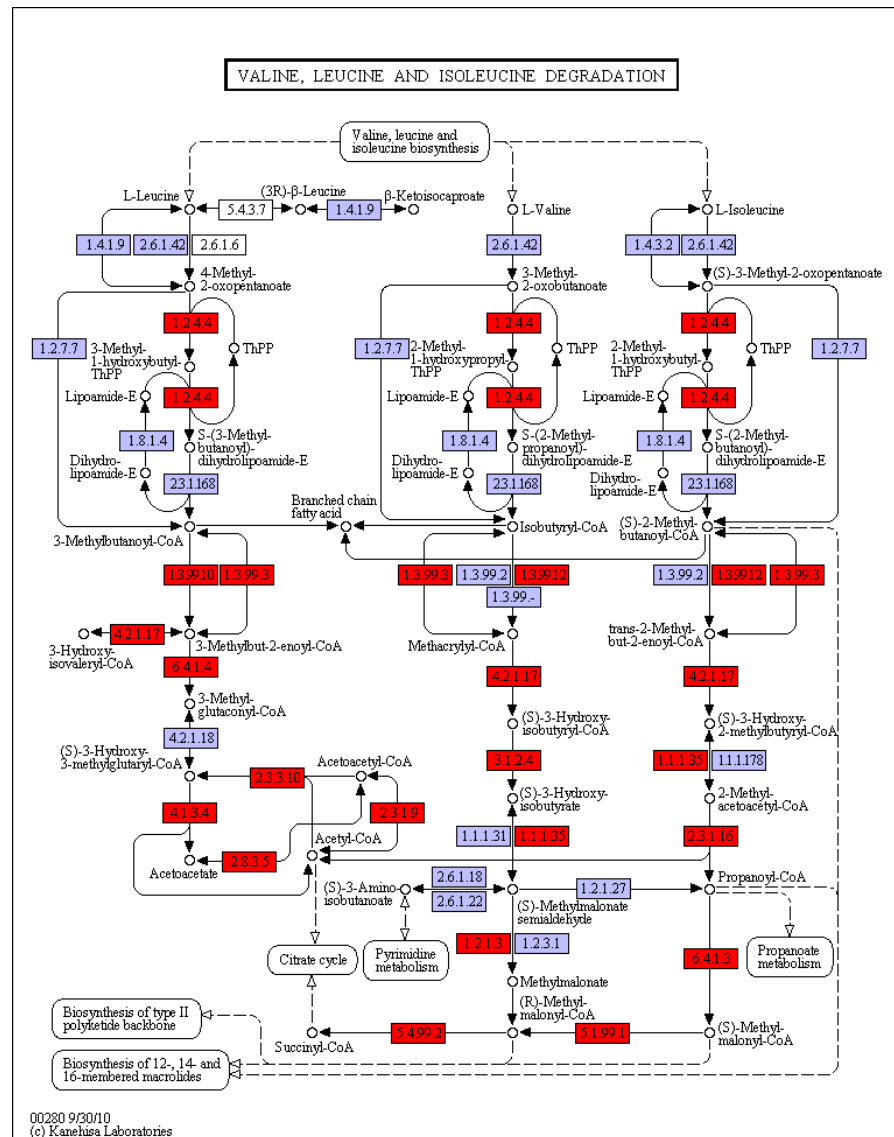

Figure 56: ko00280 Valine, leucine and isoleucine degradation

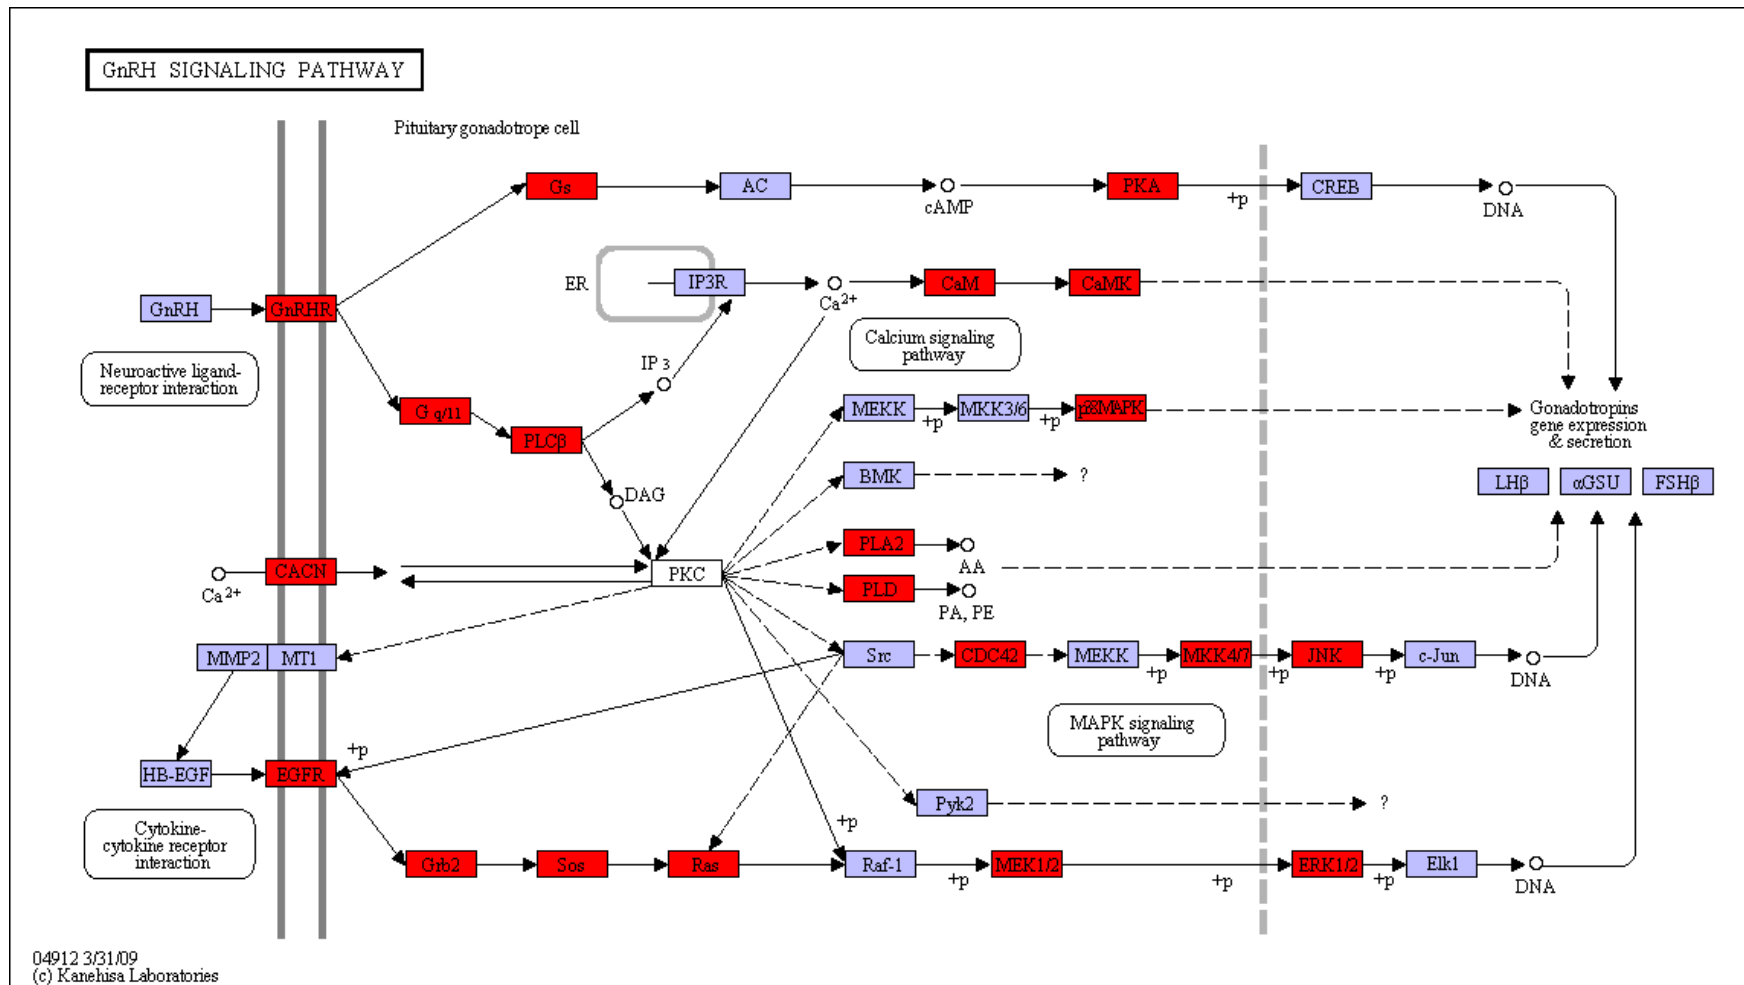

Figure 57: ko04912 GnRH signaling pathway

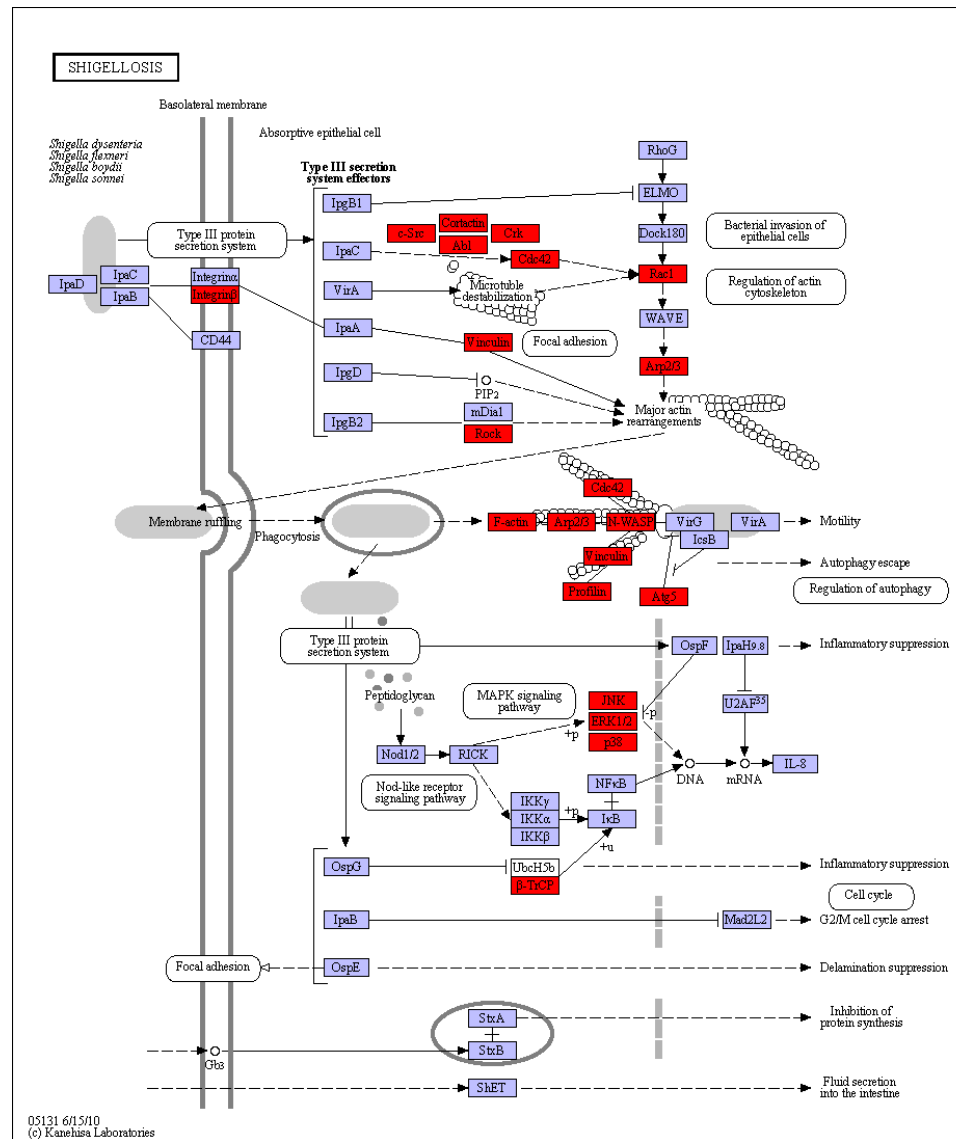

Figure 58: ko05131 Shigellosis

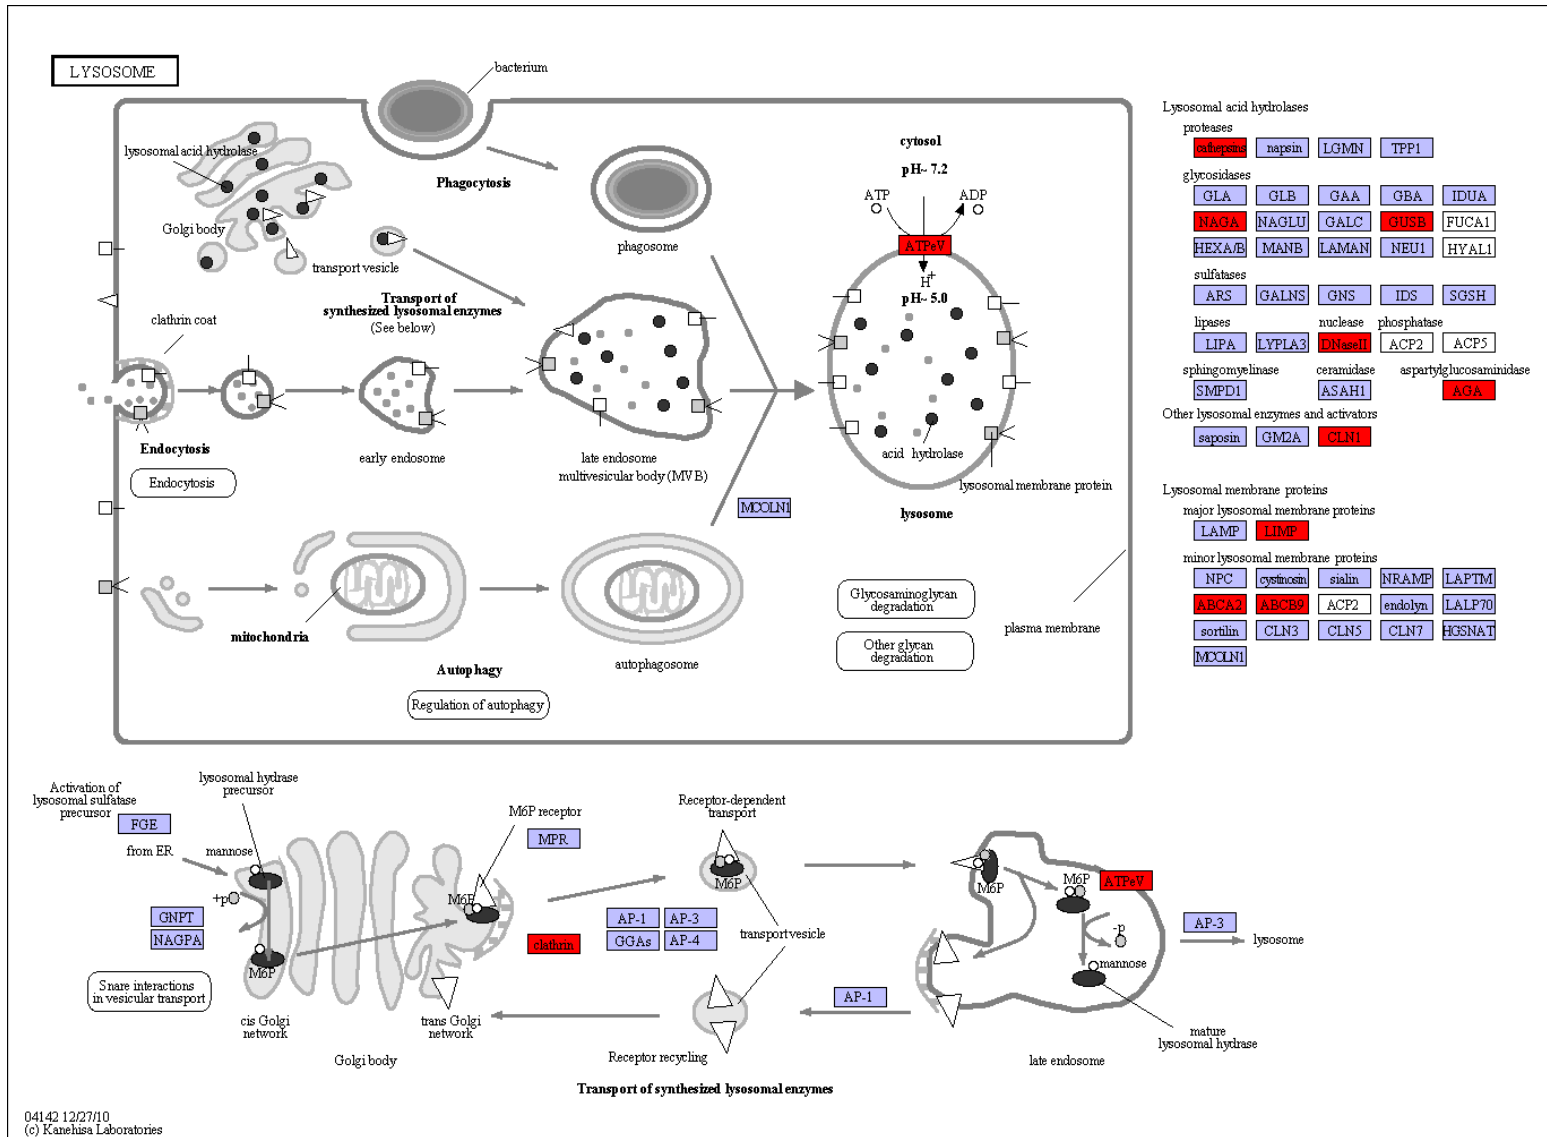

Figure 59: ko04142 Lysosome

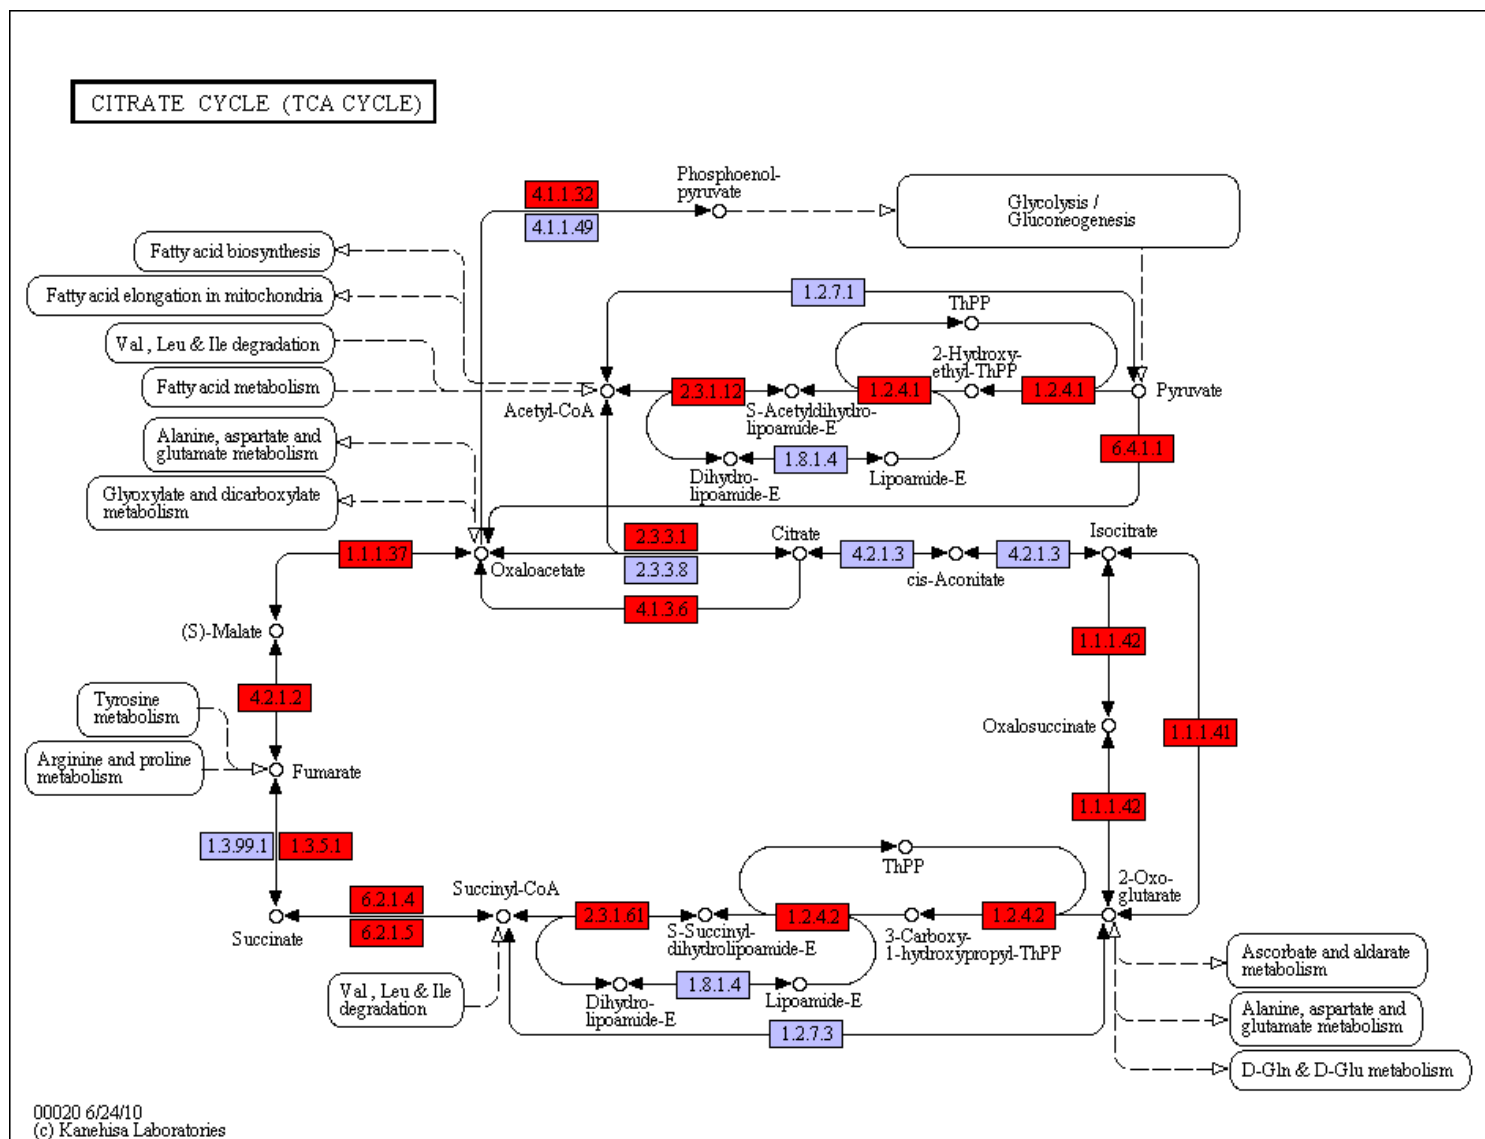

Figure 60: ko00020 Citrate cycle (TCA cycle)

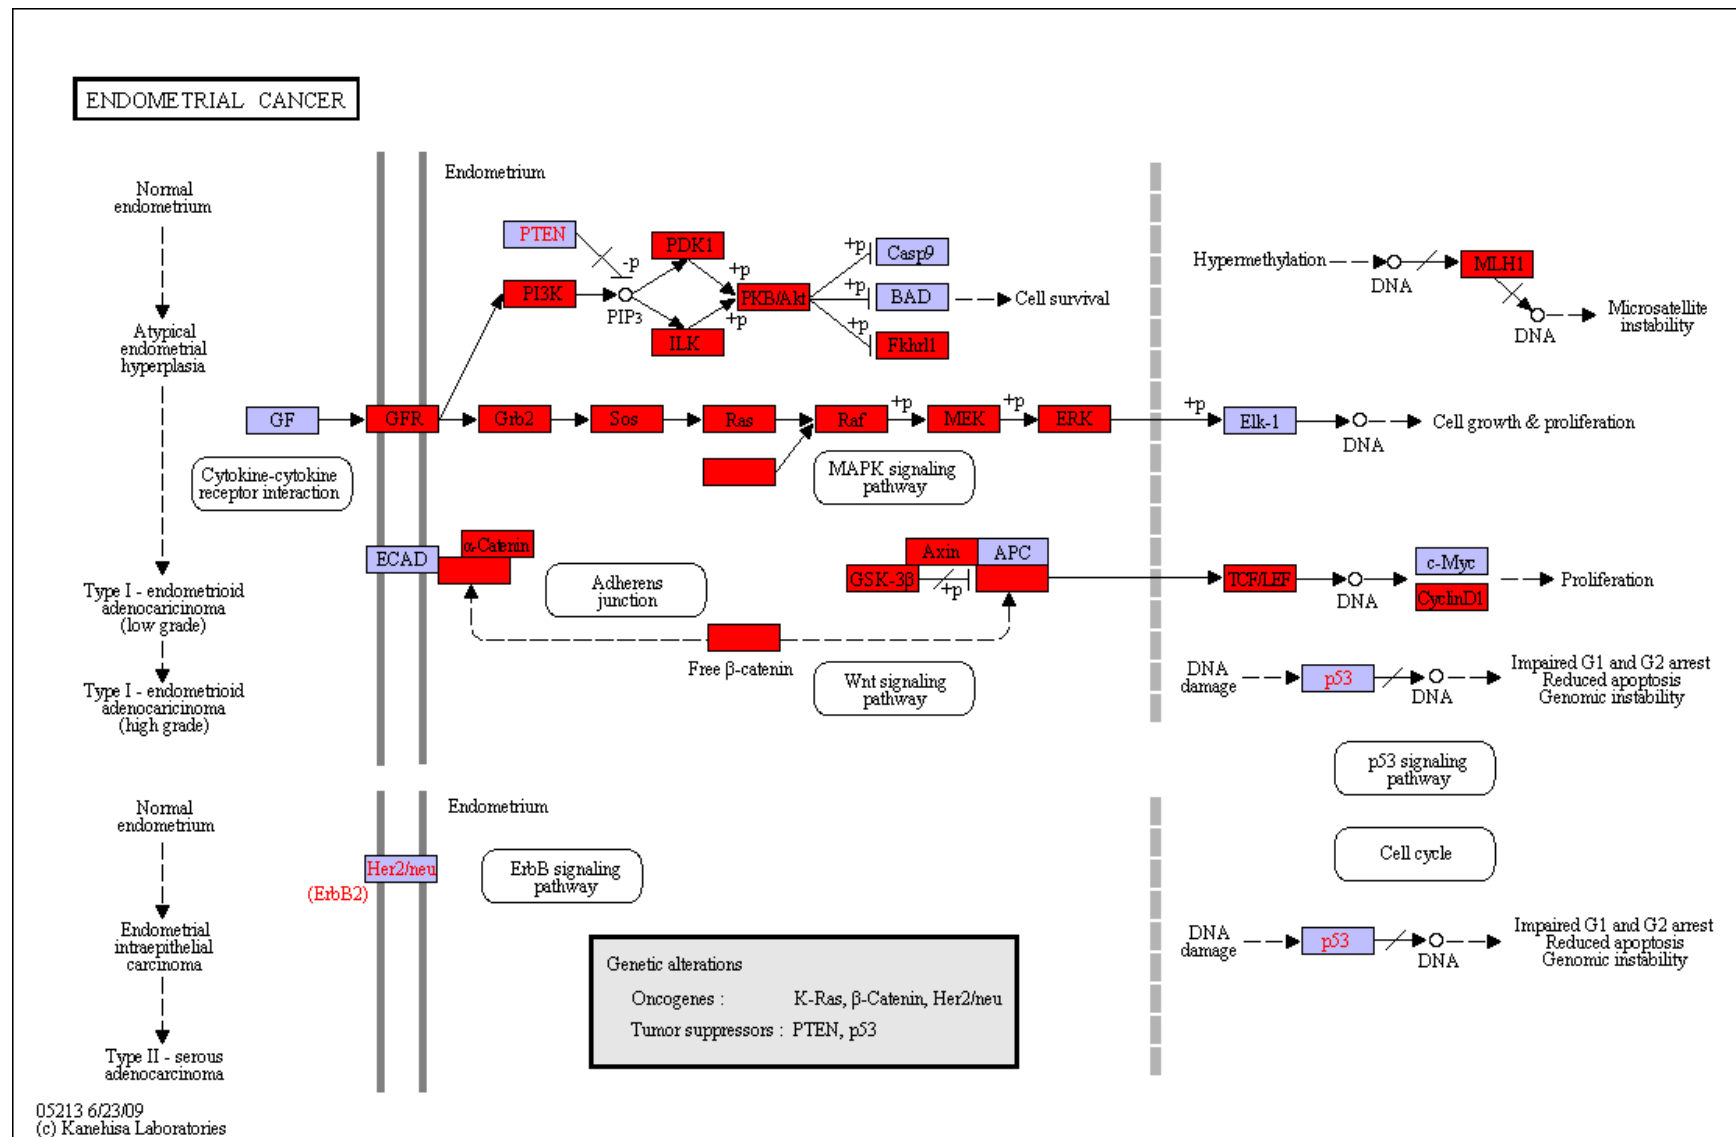

Figure 61: ko05213 Endometrial cancer

RNA POLYMERASE

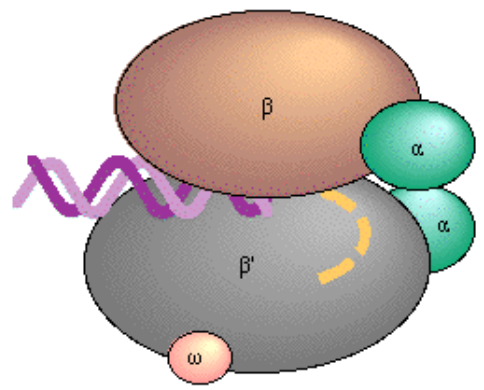

RNA polymerase (*Thermus aquaticus*)

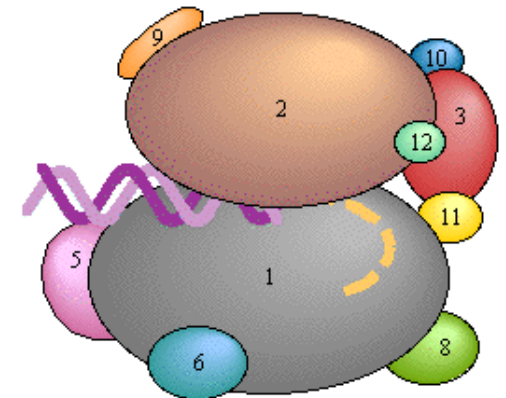

RNA polymerase II (*Saccharomyces cerevisiae*)

Bacterial

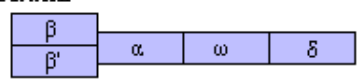

Archaeal

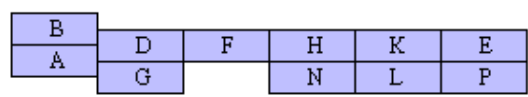

Eukaryotic Pol II

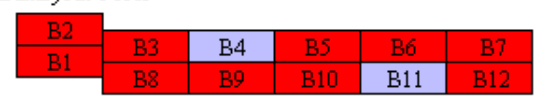

Eukaryotic Pol III

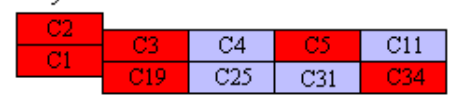

Eukaryotic Pol I

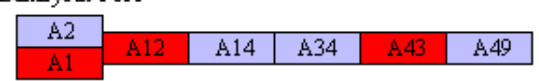

03020 6/14/10  
(c) Kanehisa Laboratories

Figure 62: ko03020 RNA polymerase

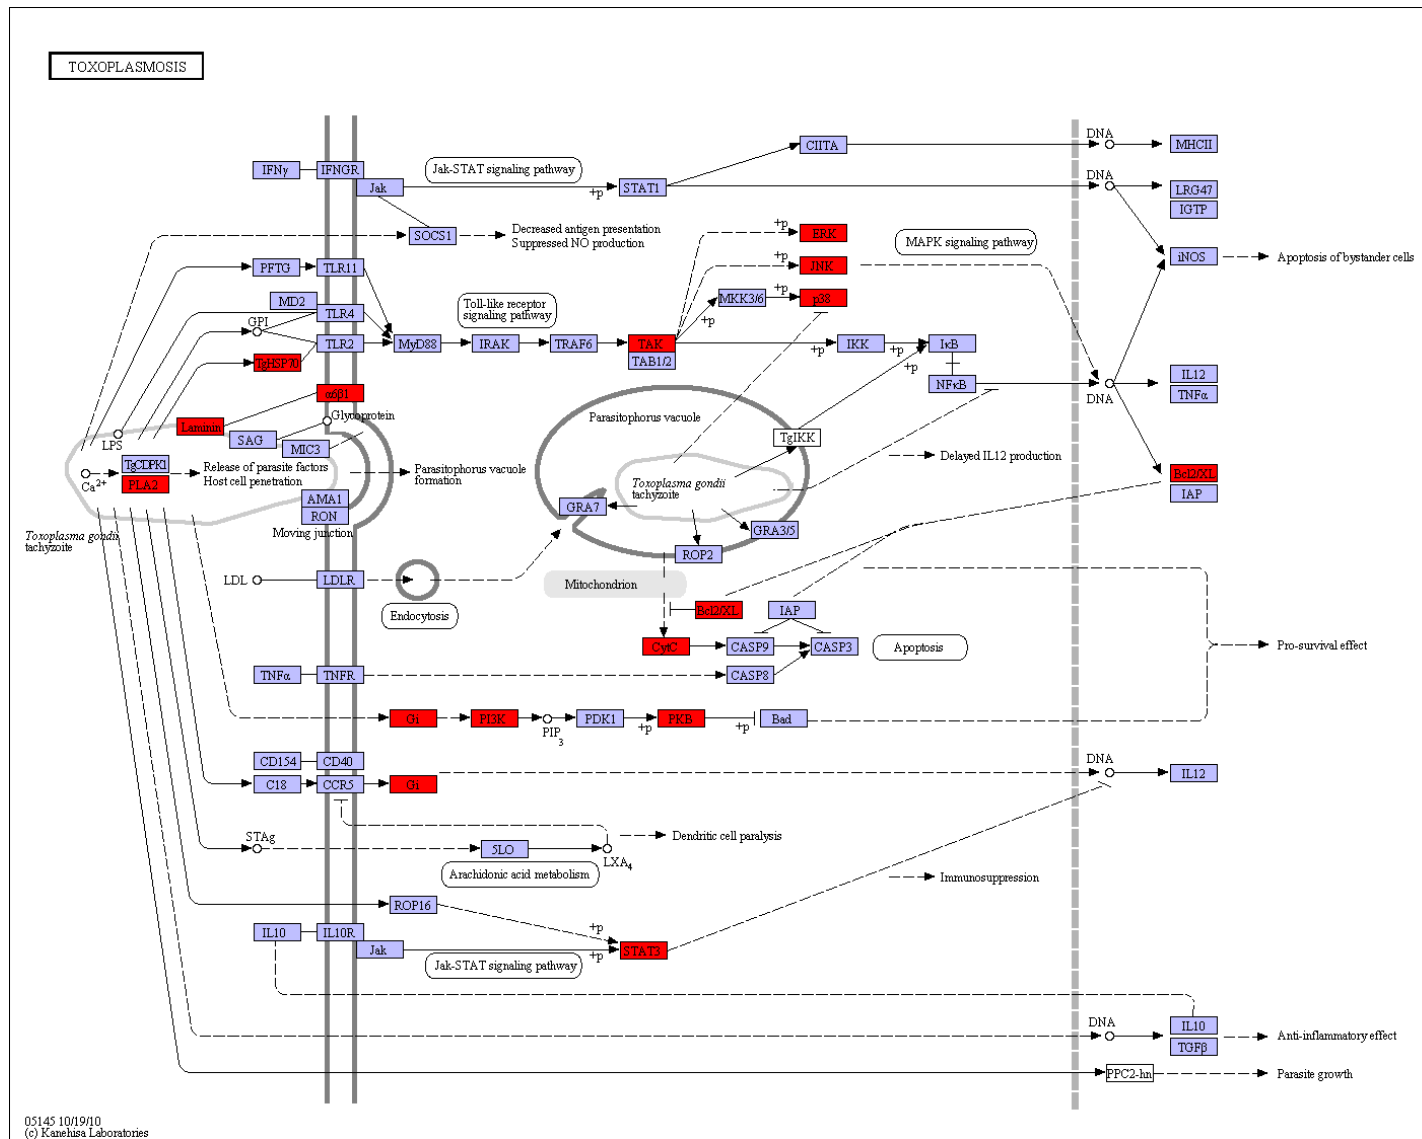

Figure 63: ko05145 Toxoplasmosis



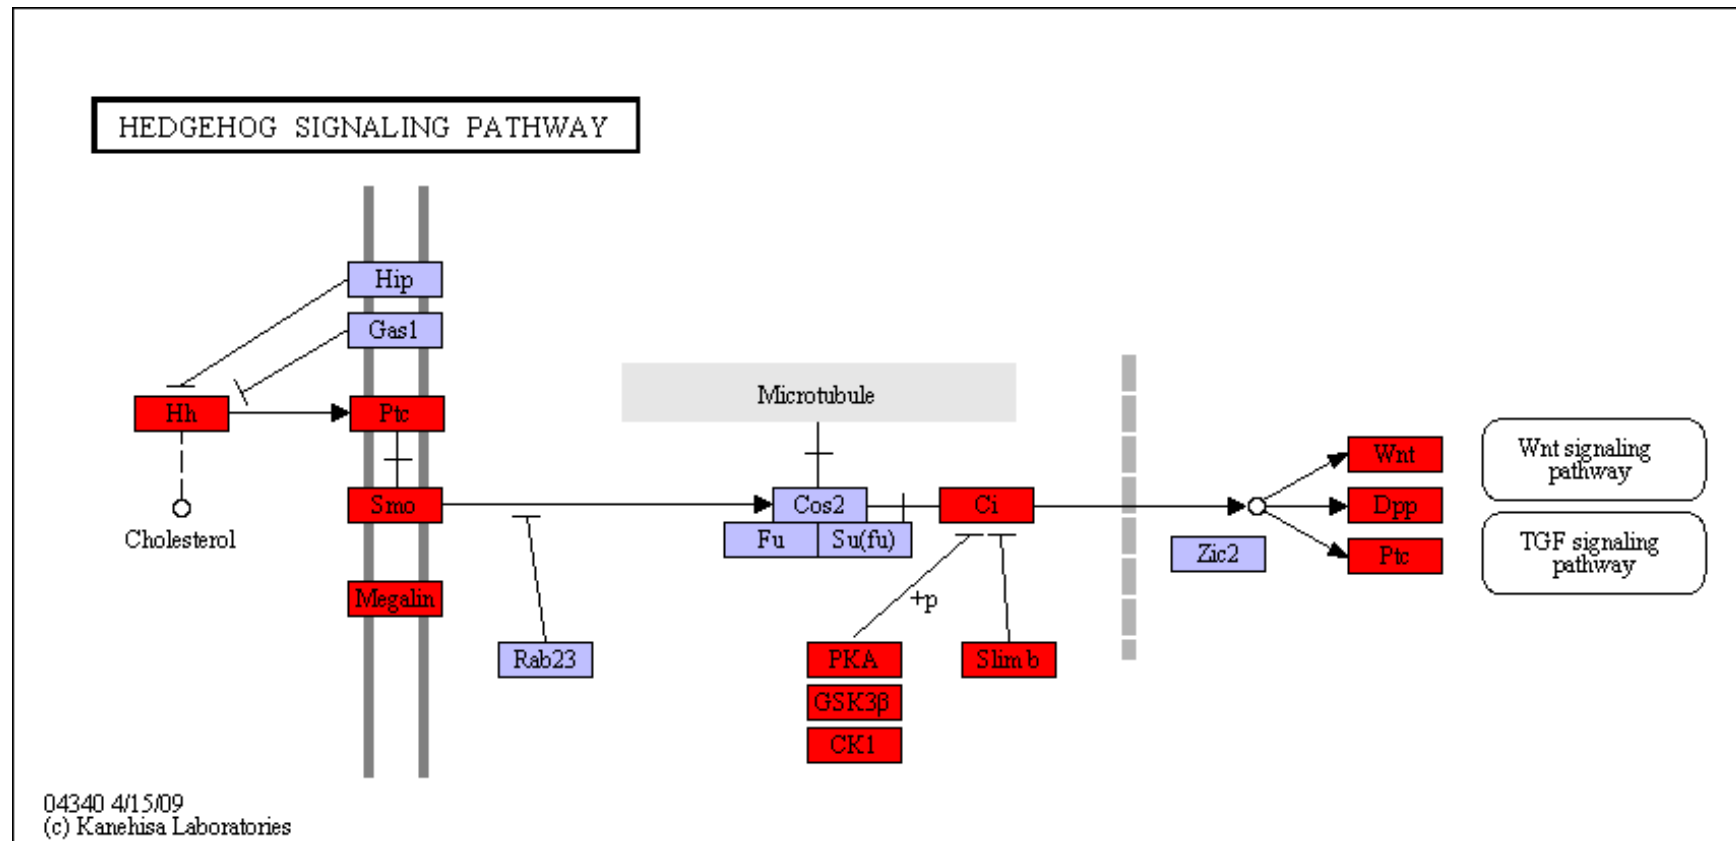

Figure 64: ko04340 Hedgehog signaling pathway

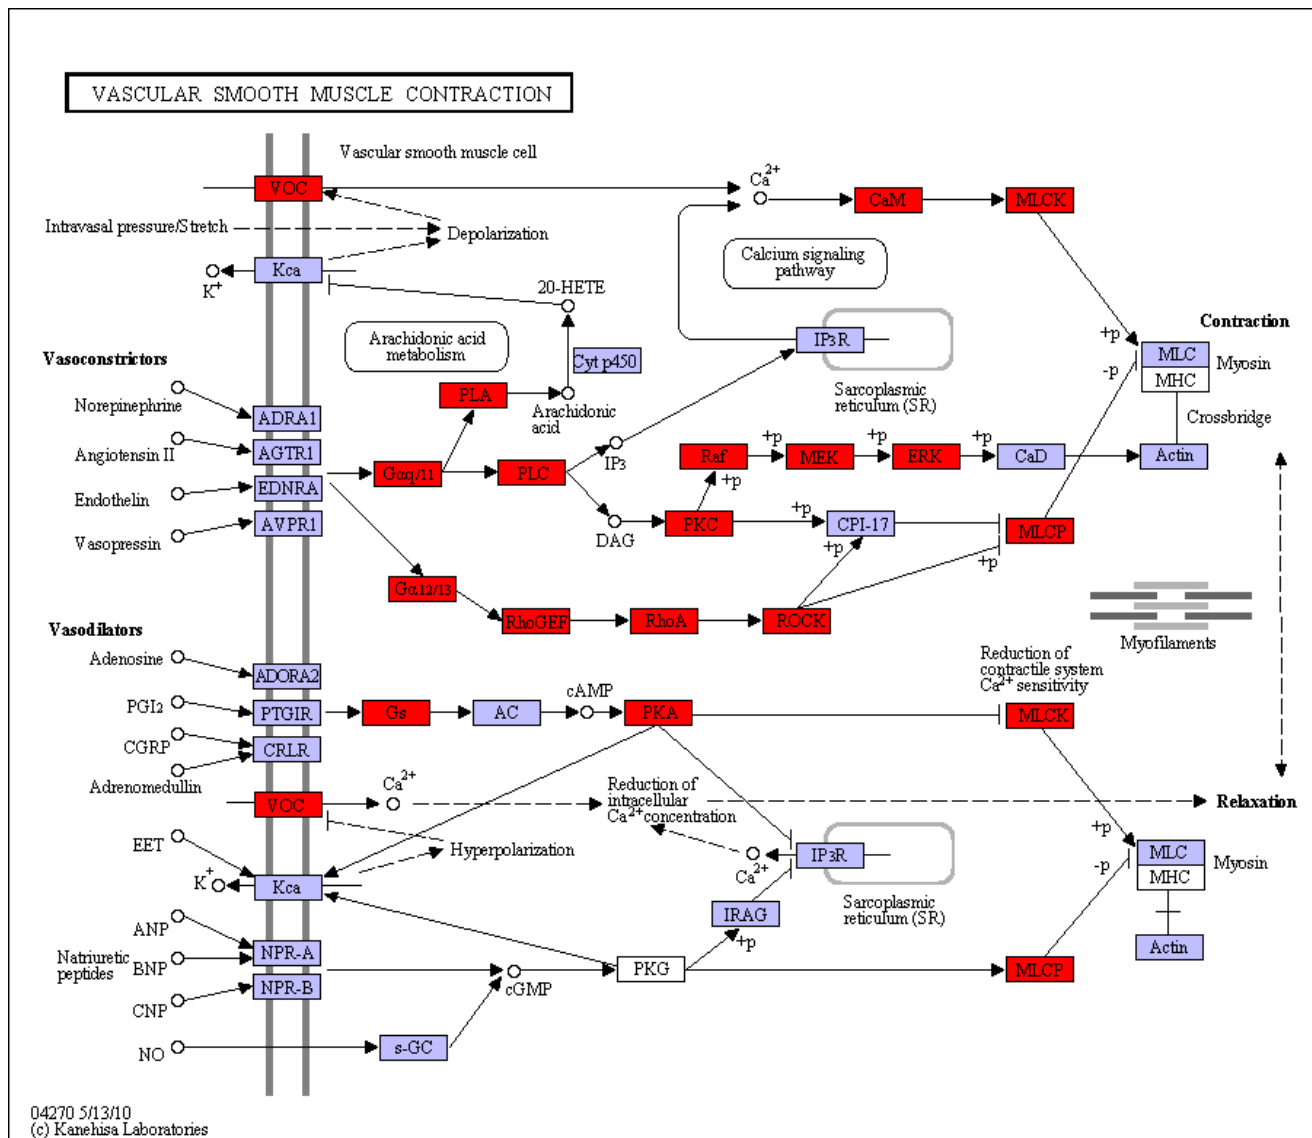

Figure 65: ko04270 Vascular smooth muscle contraction

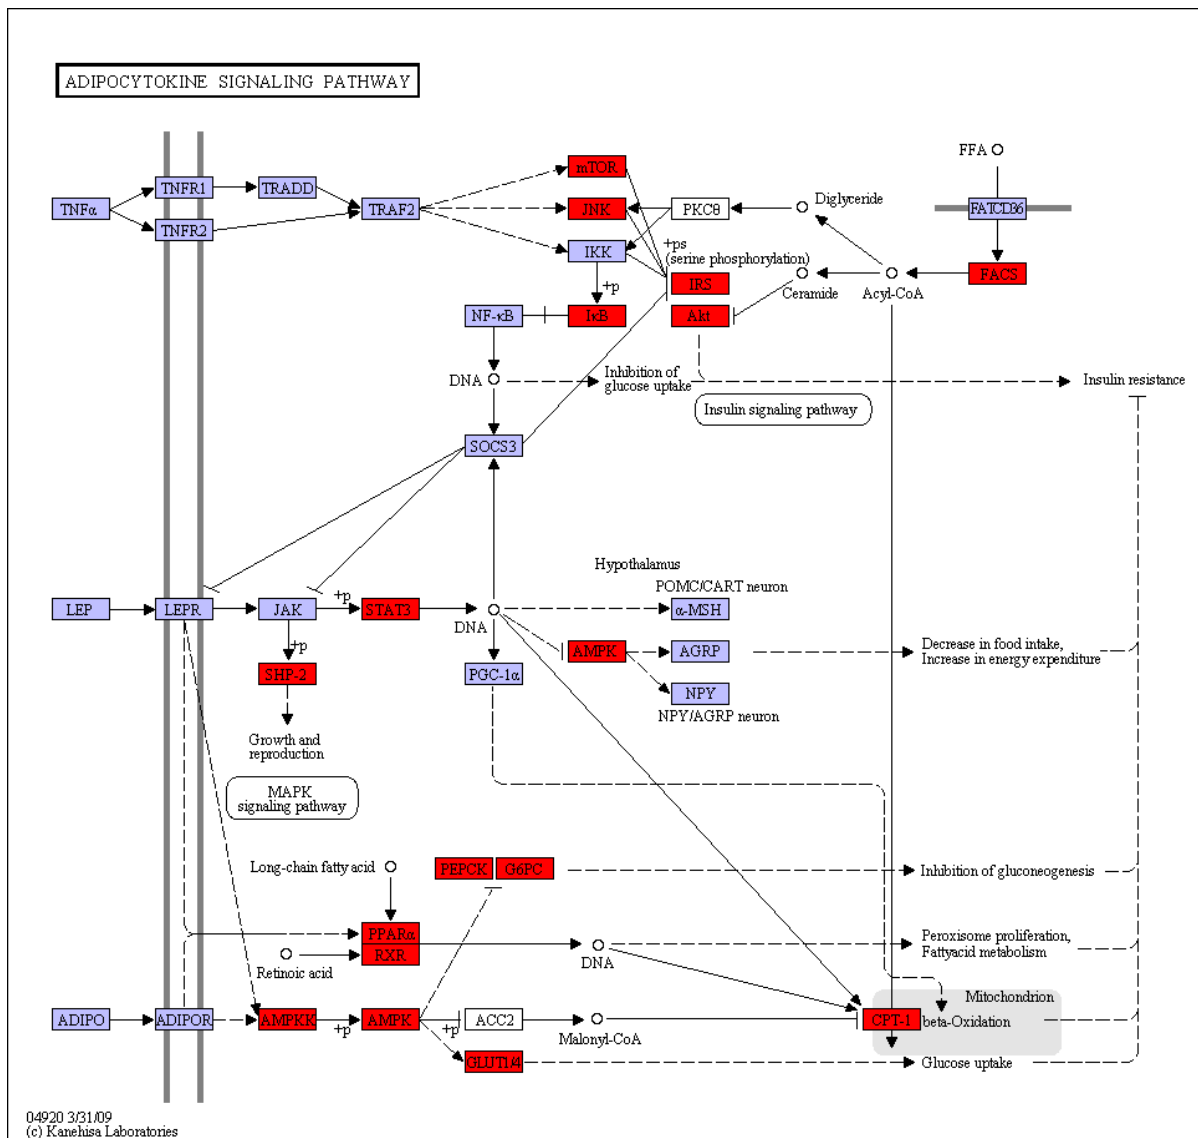

Figure 66: ko04920 Adipocytokine signaling pathway

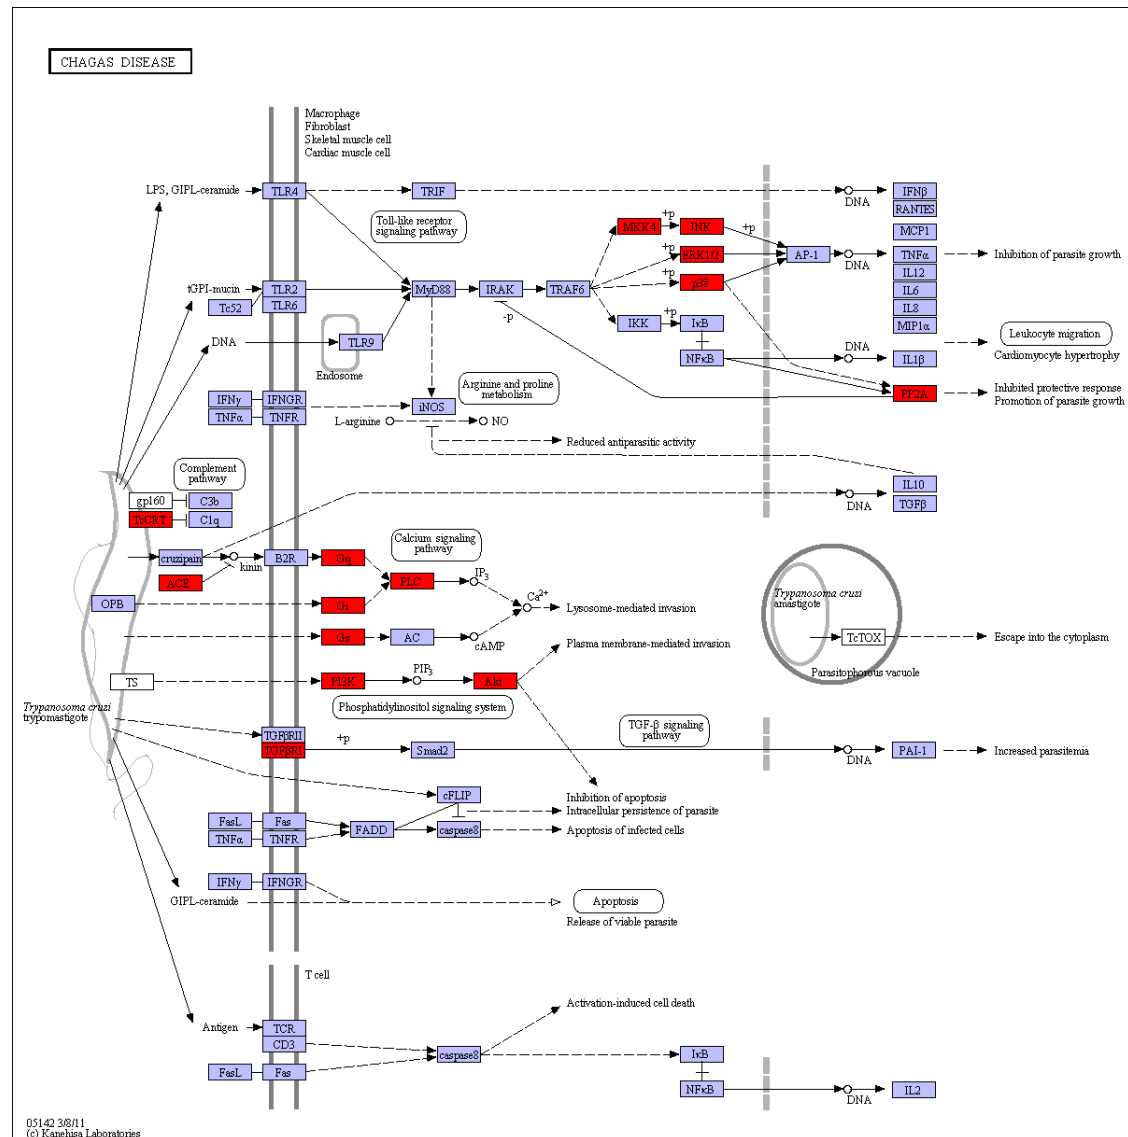

Figure 67: ko05142 Chagas disease (American trypanosomiasis)

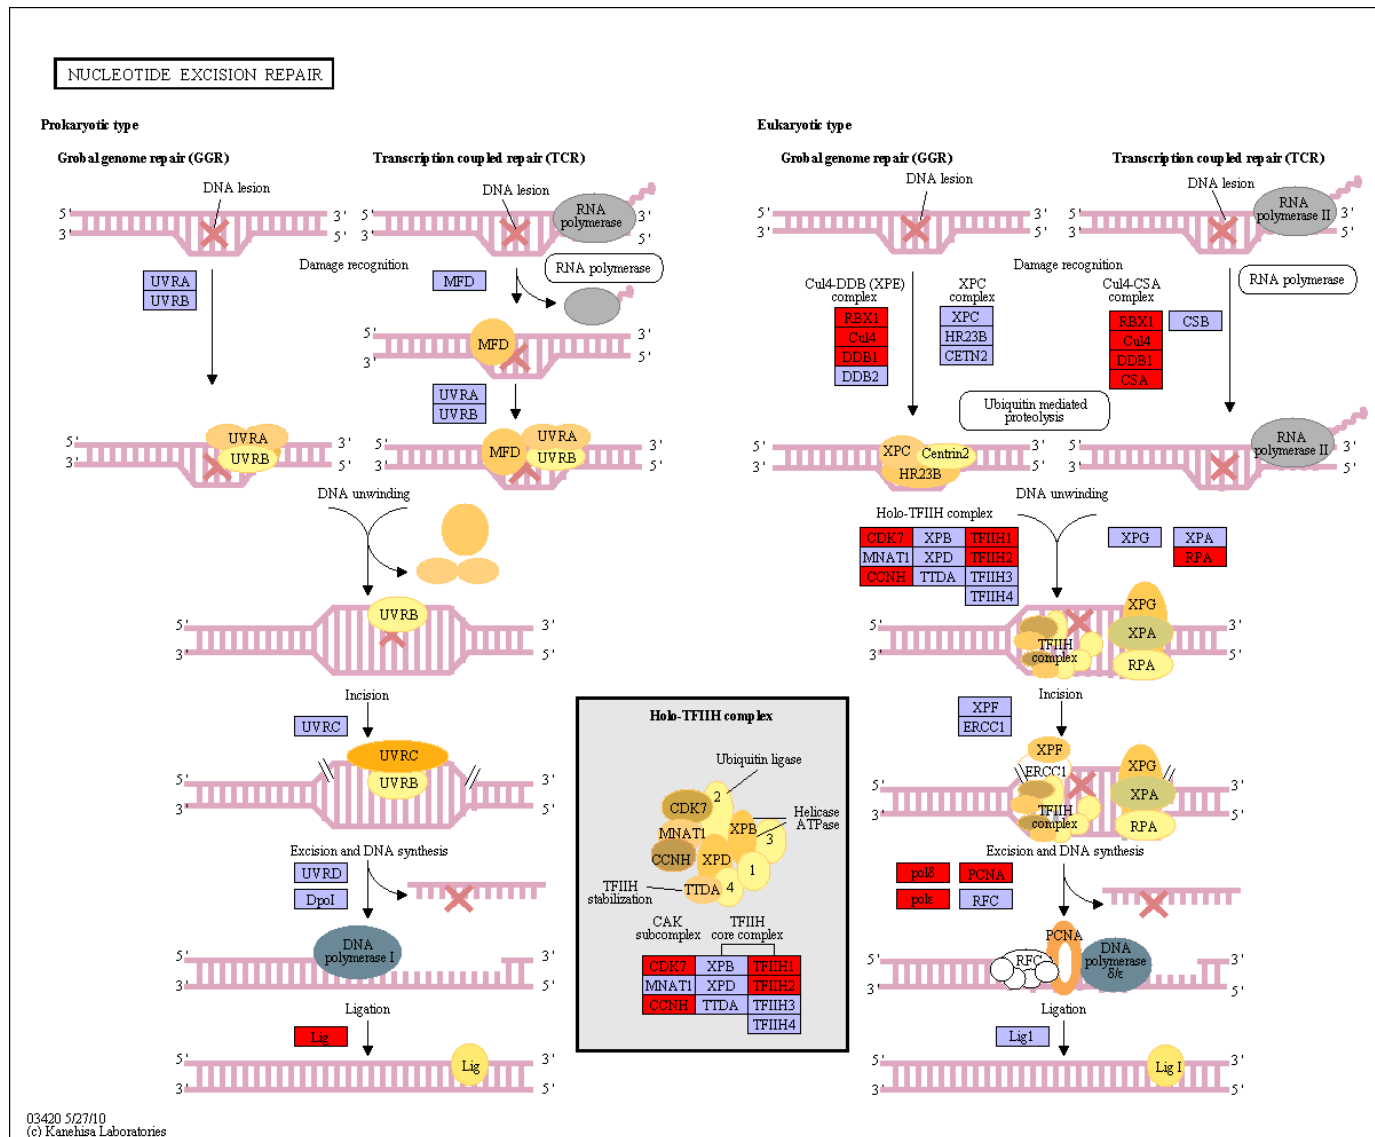

Figure 68: ko03420 Nucleotide excision repair

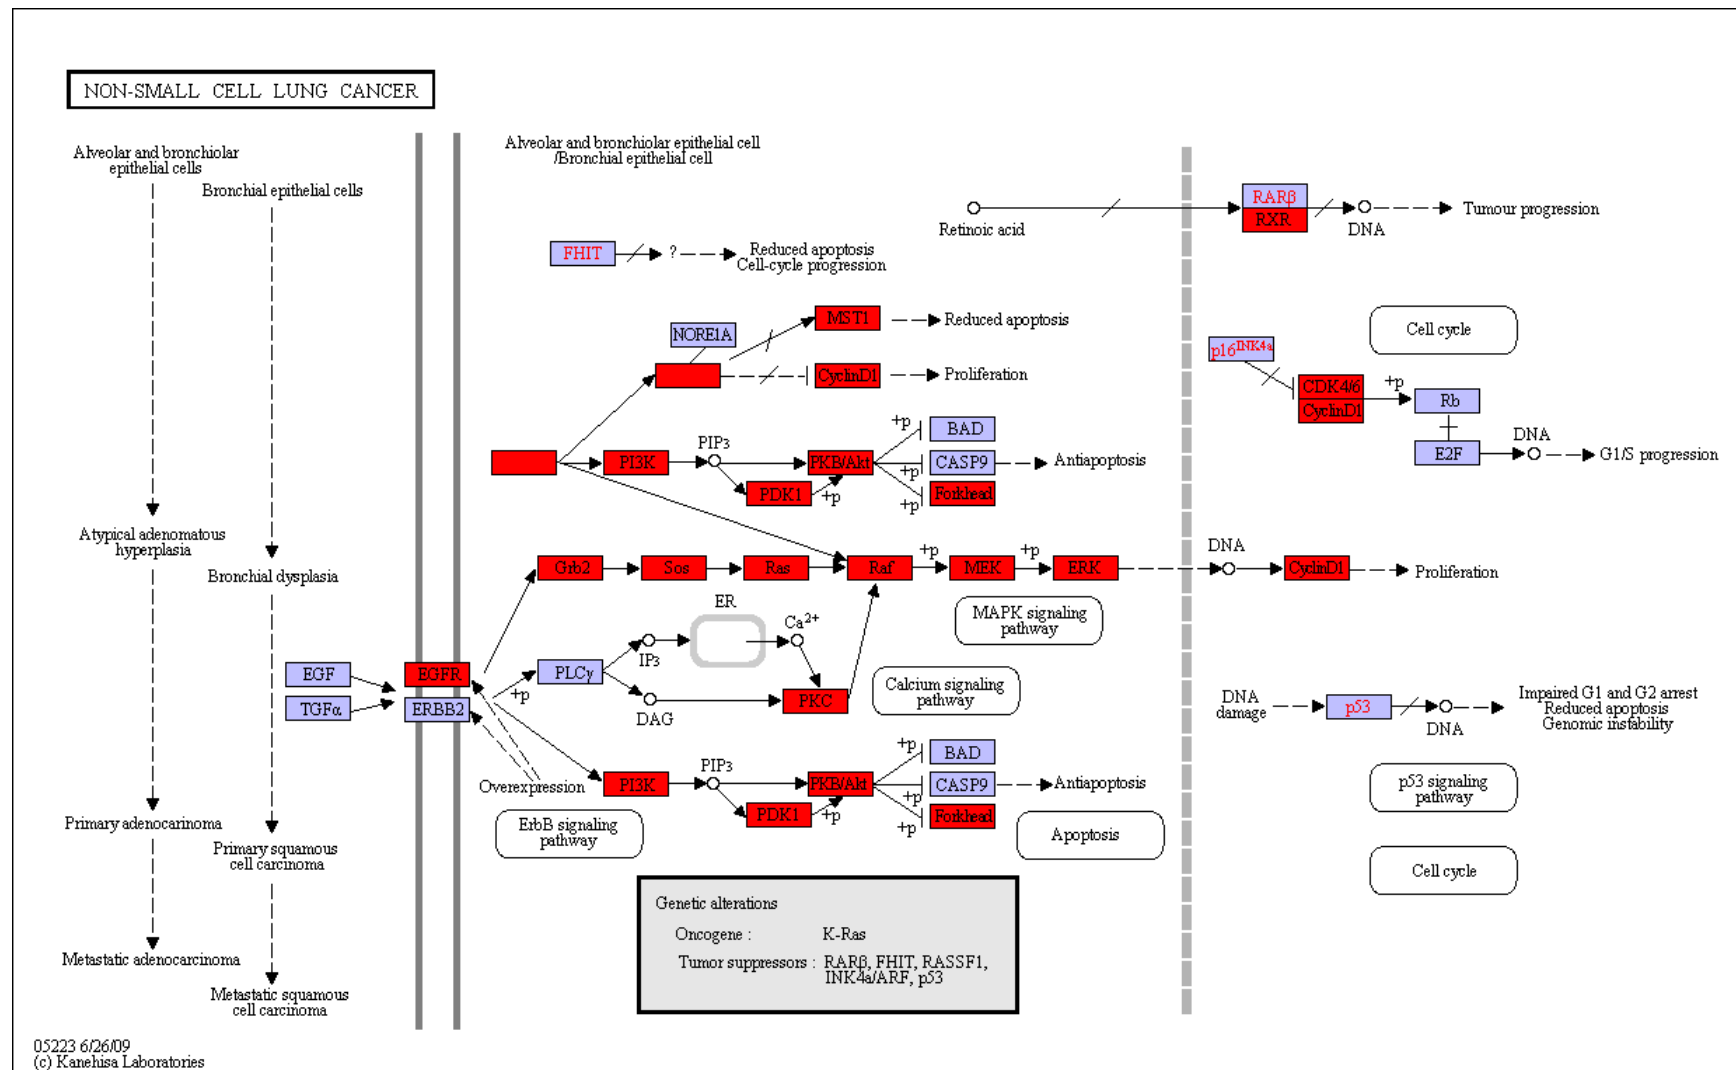

Figure 69: ko05223 Non-small cell lung cancer

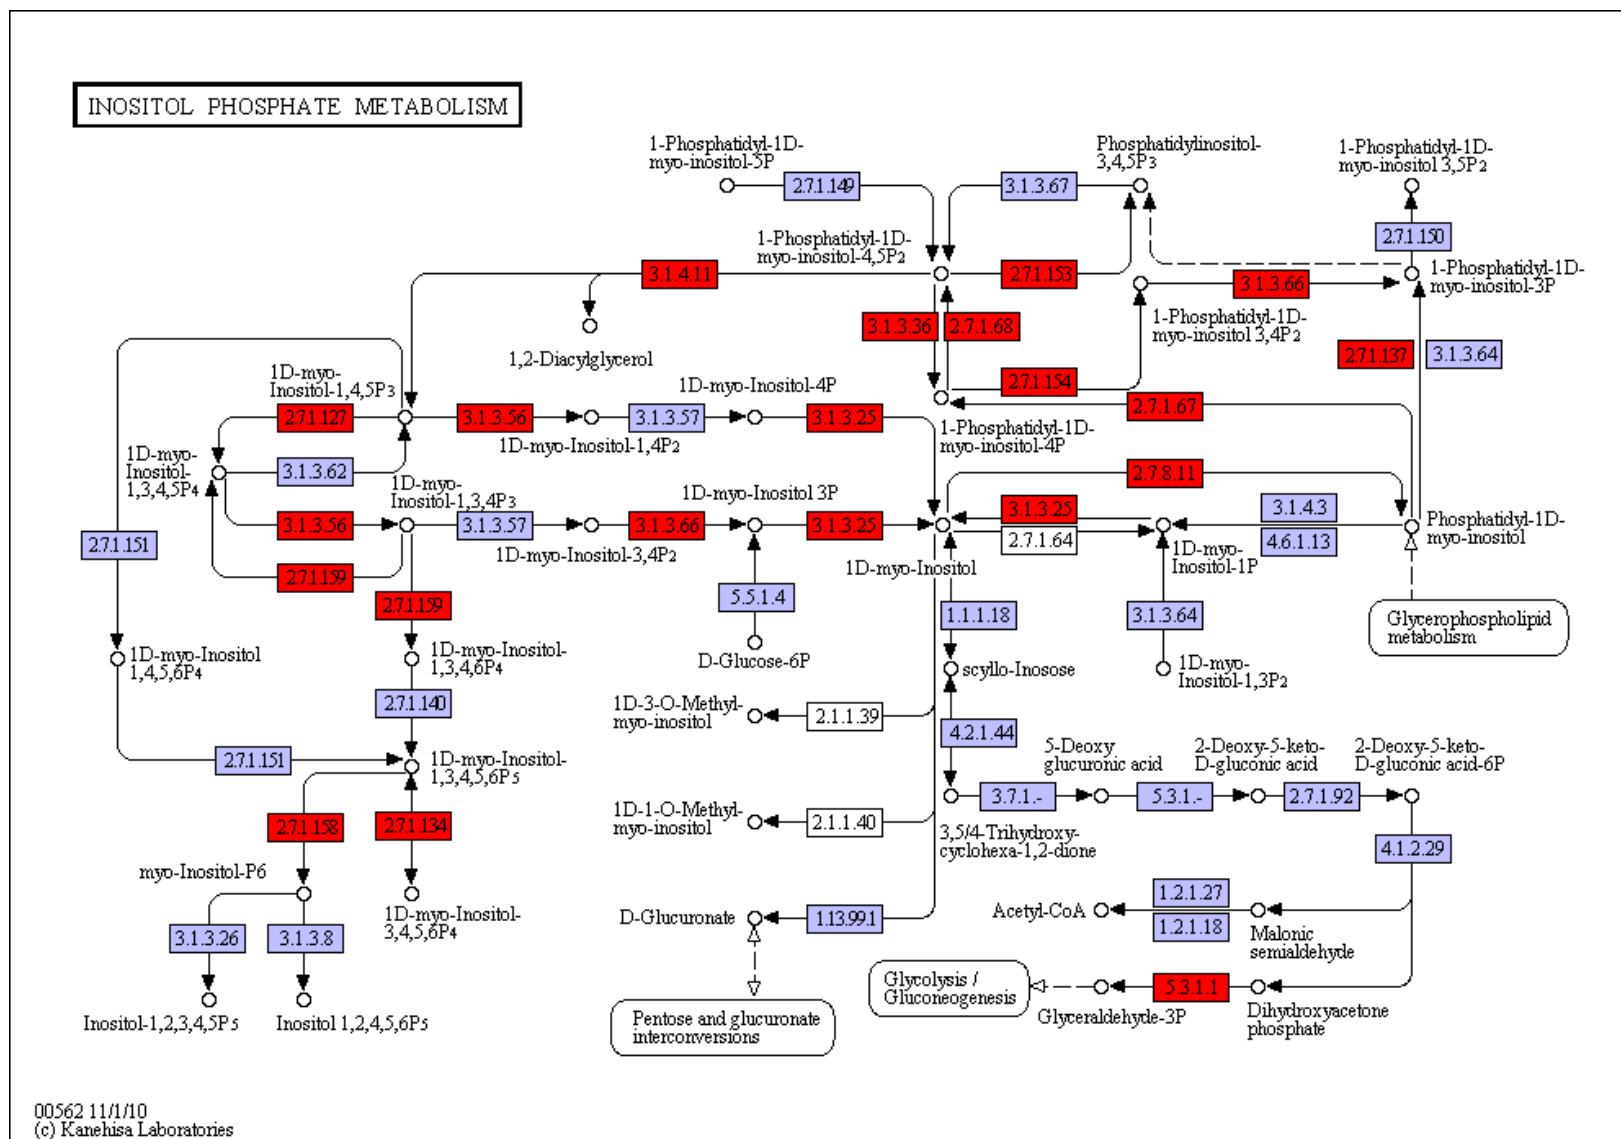

Figure 70: ko00562 Inositol phosphate metabolism

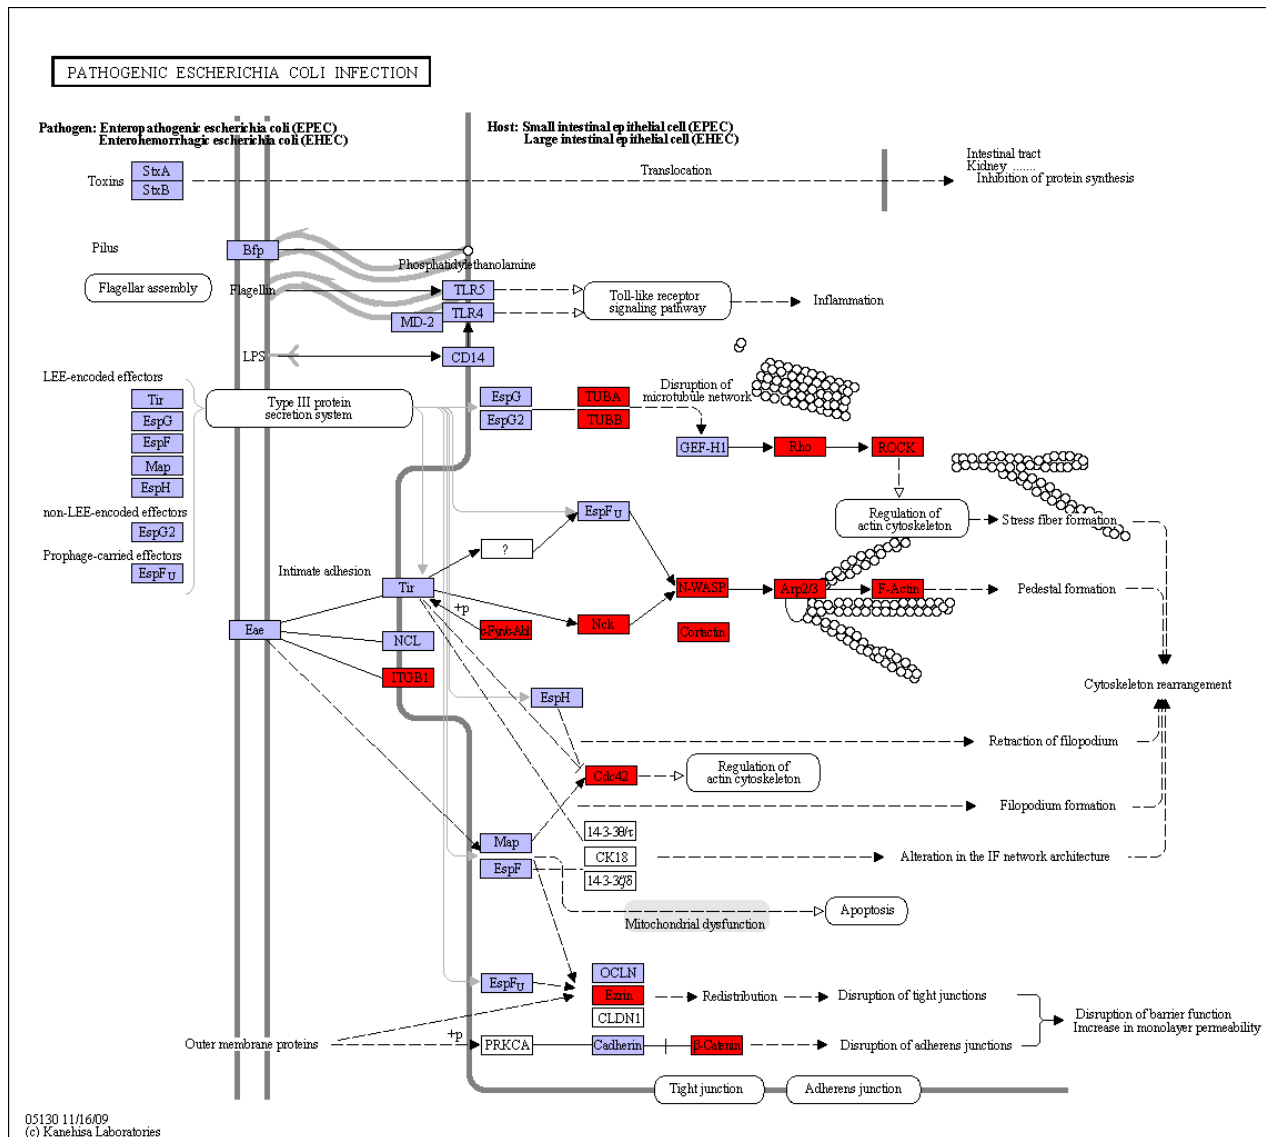

Figure 71: ko05130 Pathogenic *Escherichia coli* infection



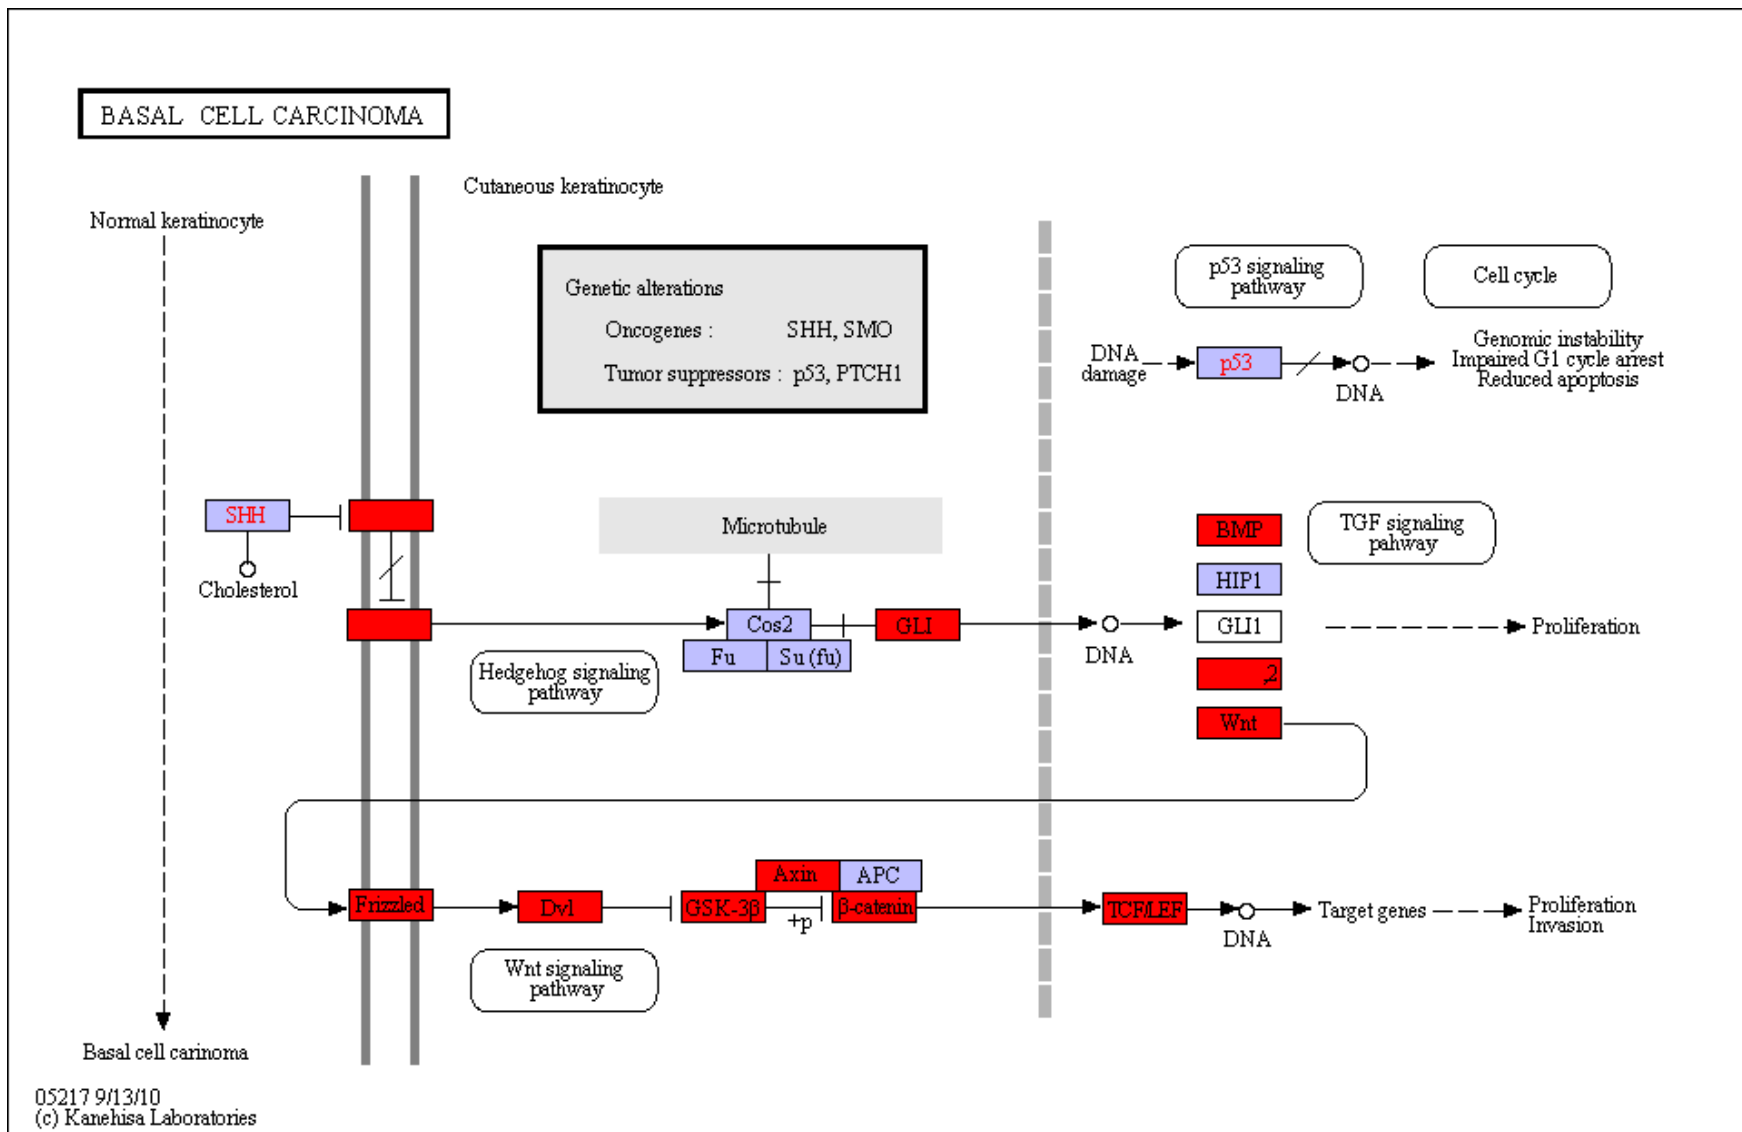

Figure 72: ko05217 Basal cell carcinoma



**BASAL TRANSCRIPTION FACTORS (EUKARYOTES)**

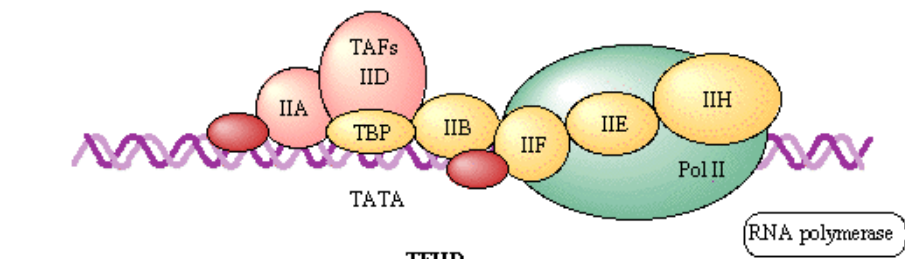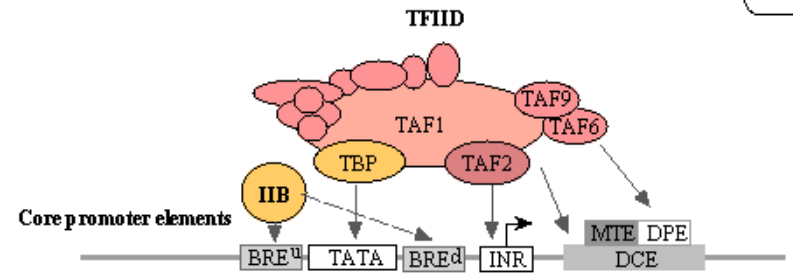

**General transcription factors for RNA polymerase II**

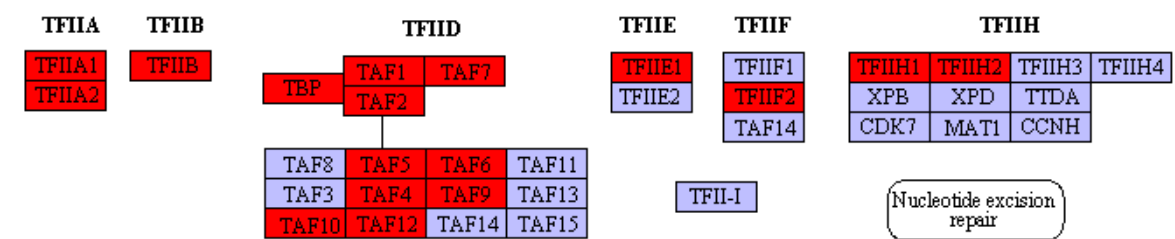

03022 3/15/11  
(c) Kanehisa Laboratories

Figure 74: ko03022 Basal transcription factors

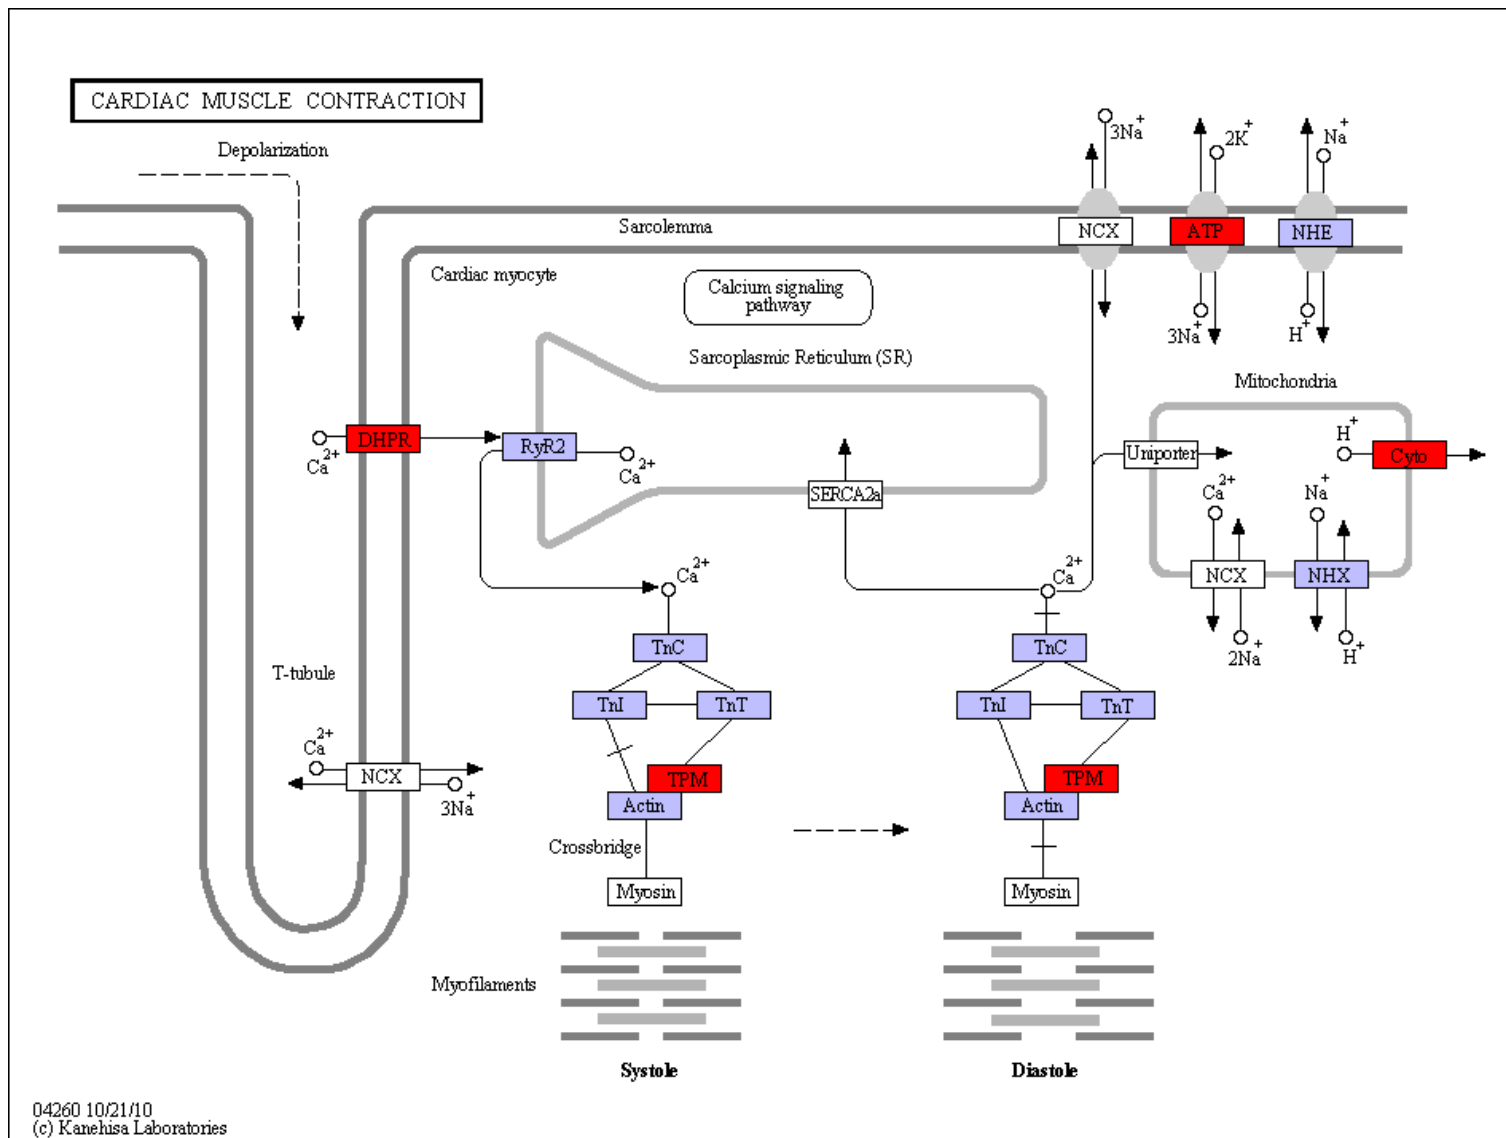

Figure 75: ko04260 Cardiac muscle contraction

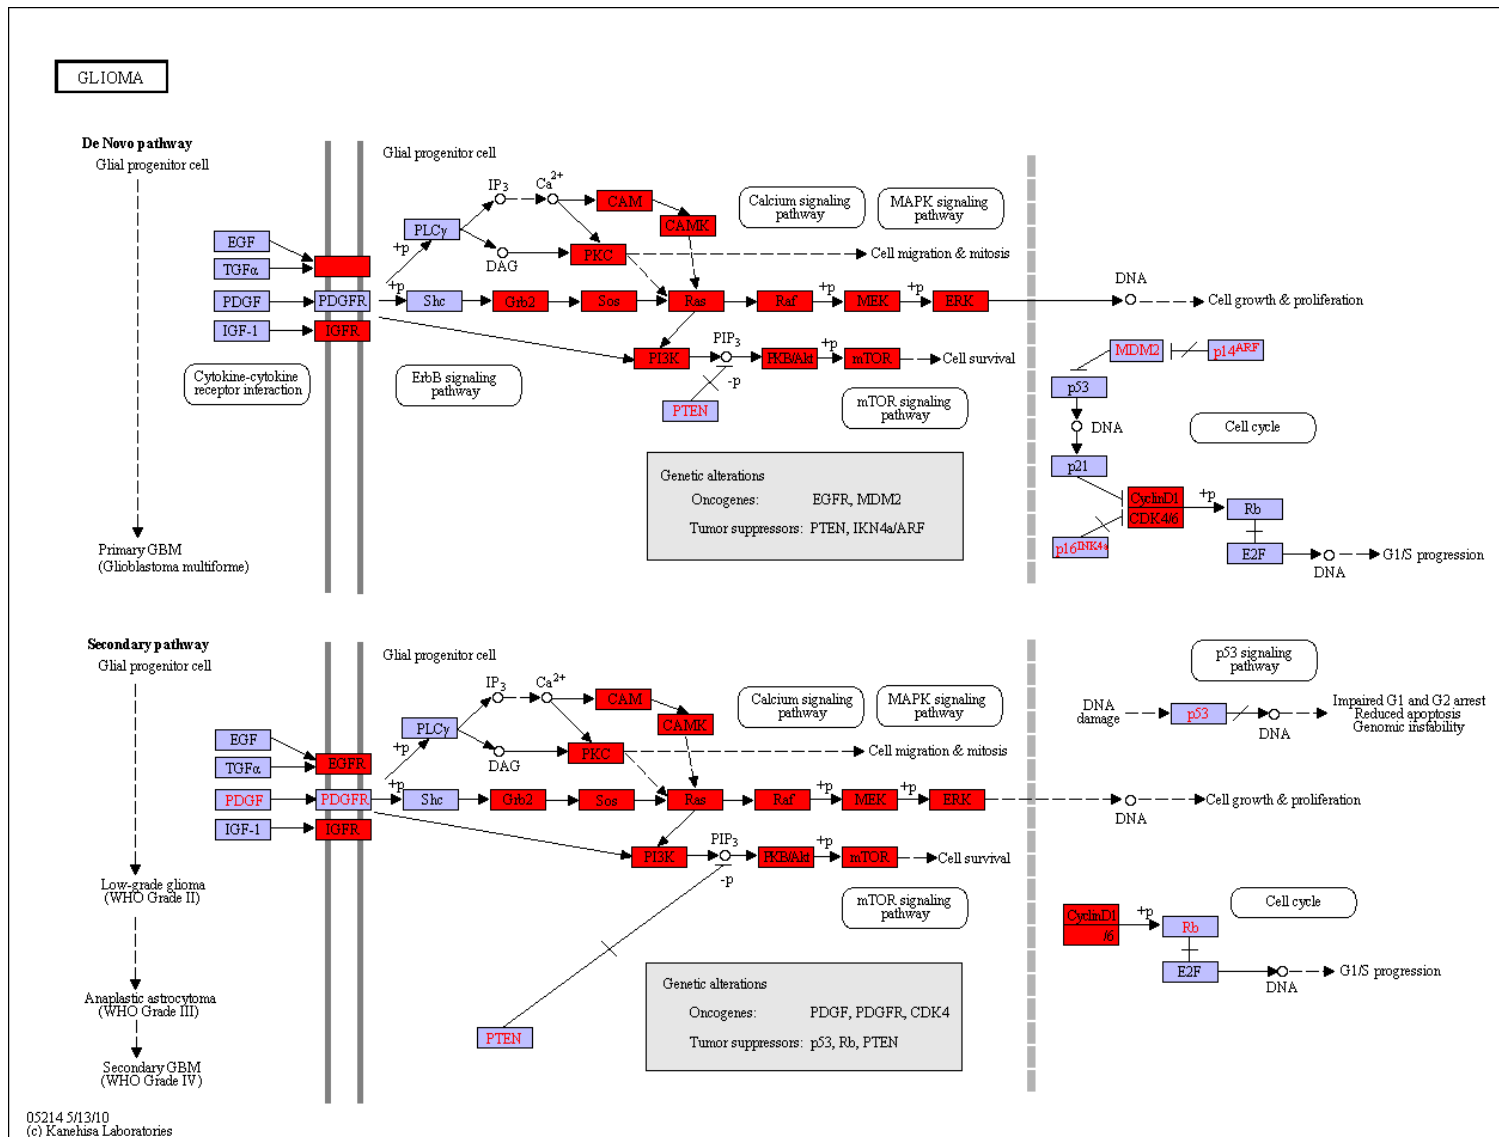

Figure 76: ko05214 Glioma

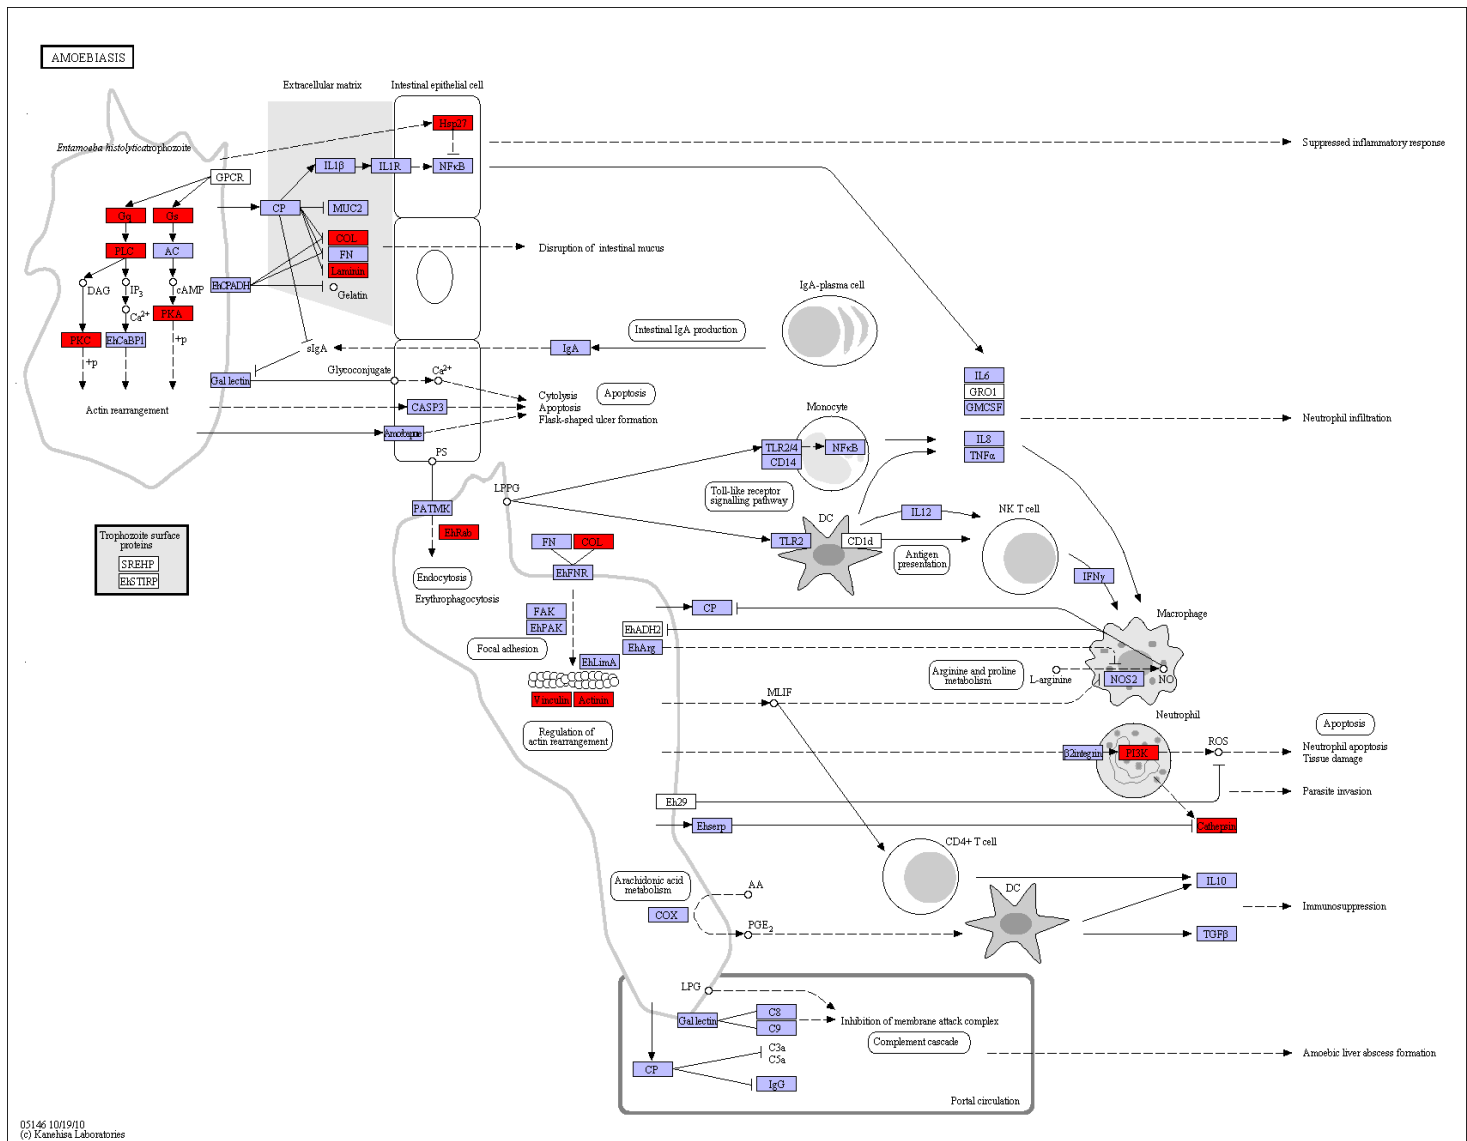

Figure 77: ko05146 Amoebiasis

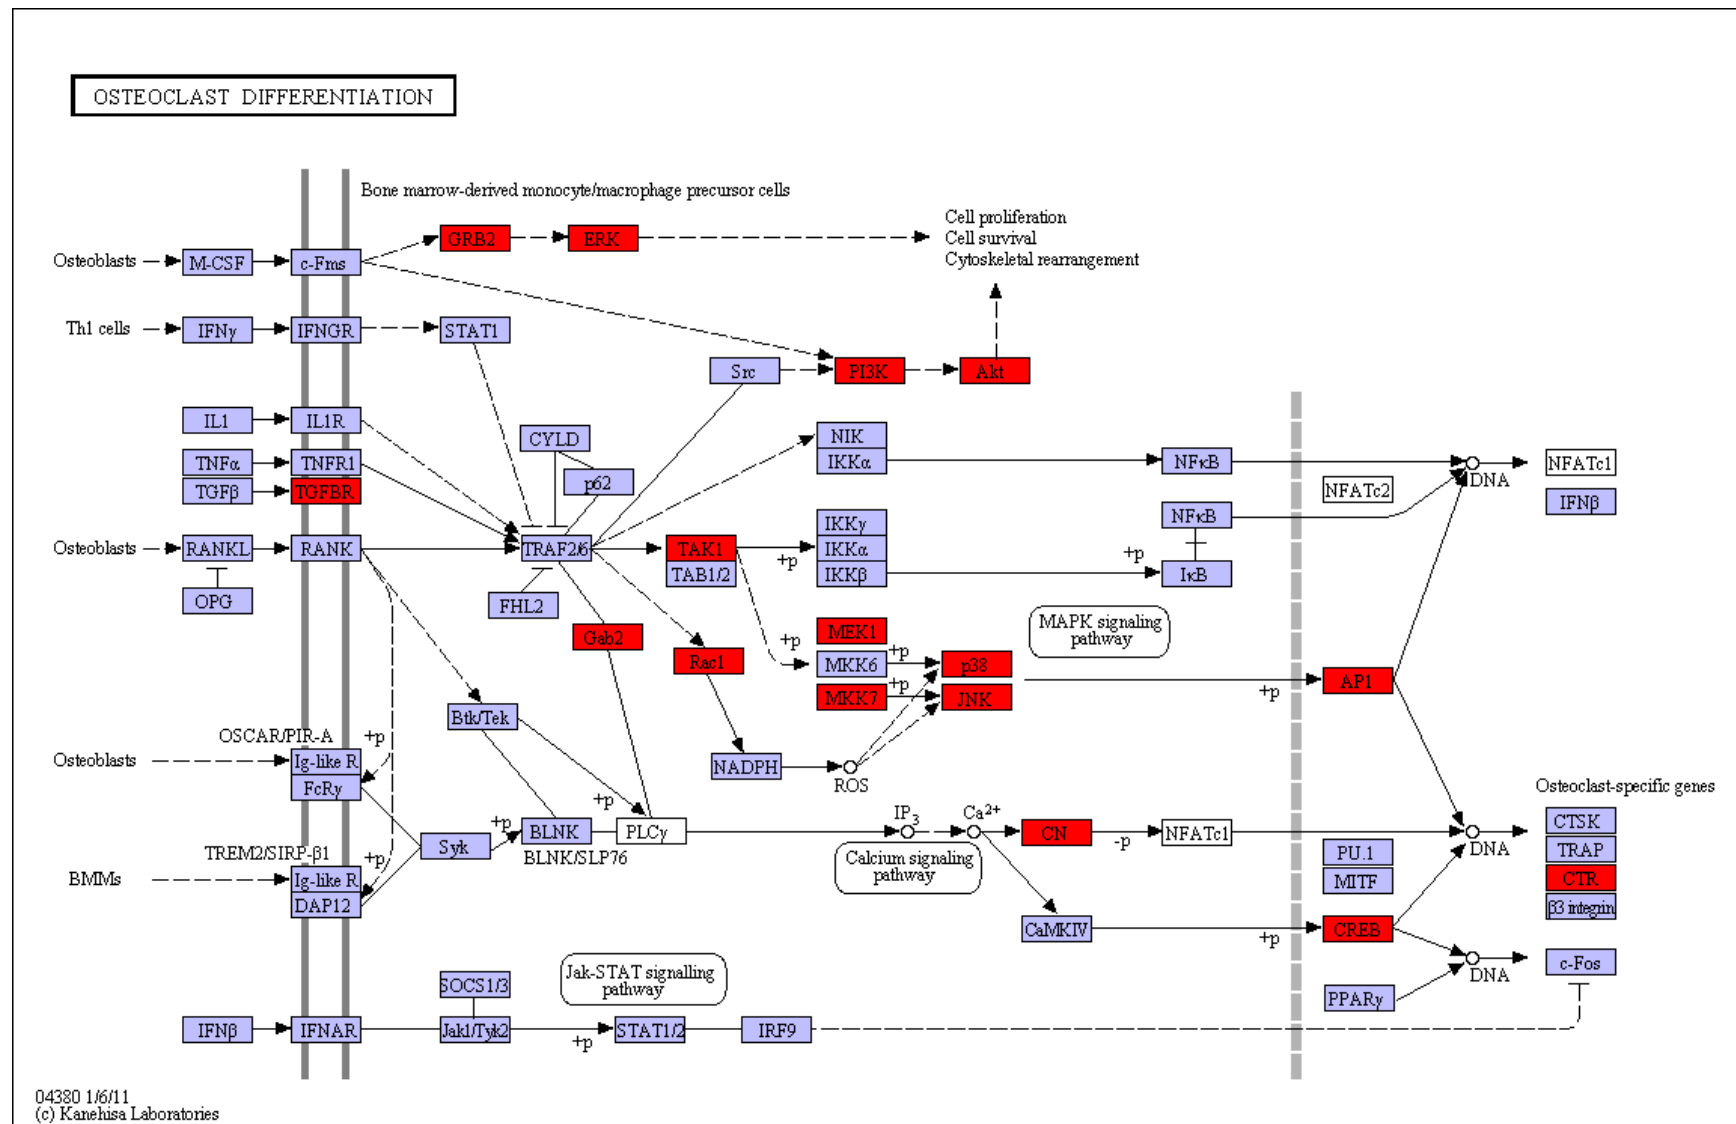

Figure 78: ko04380 Osteoclast differentiation

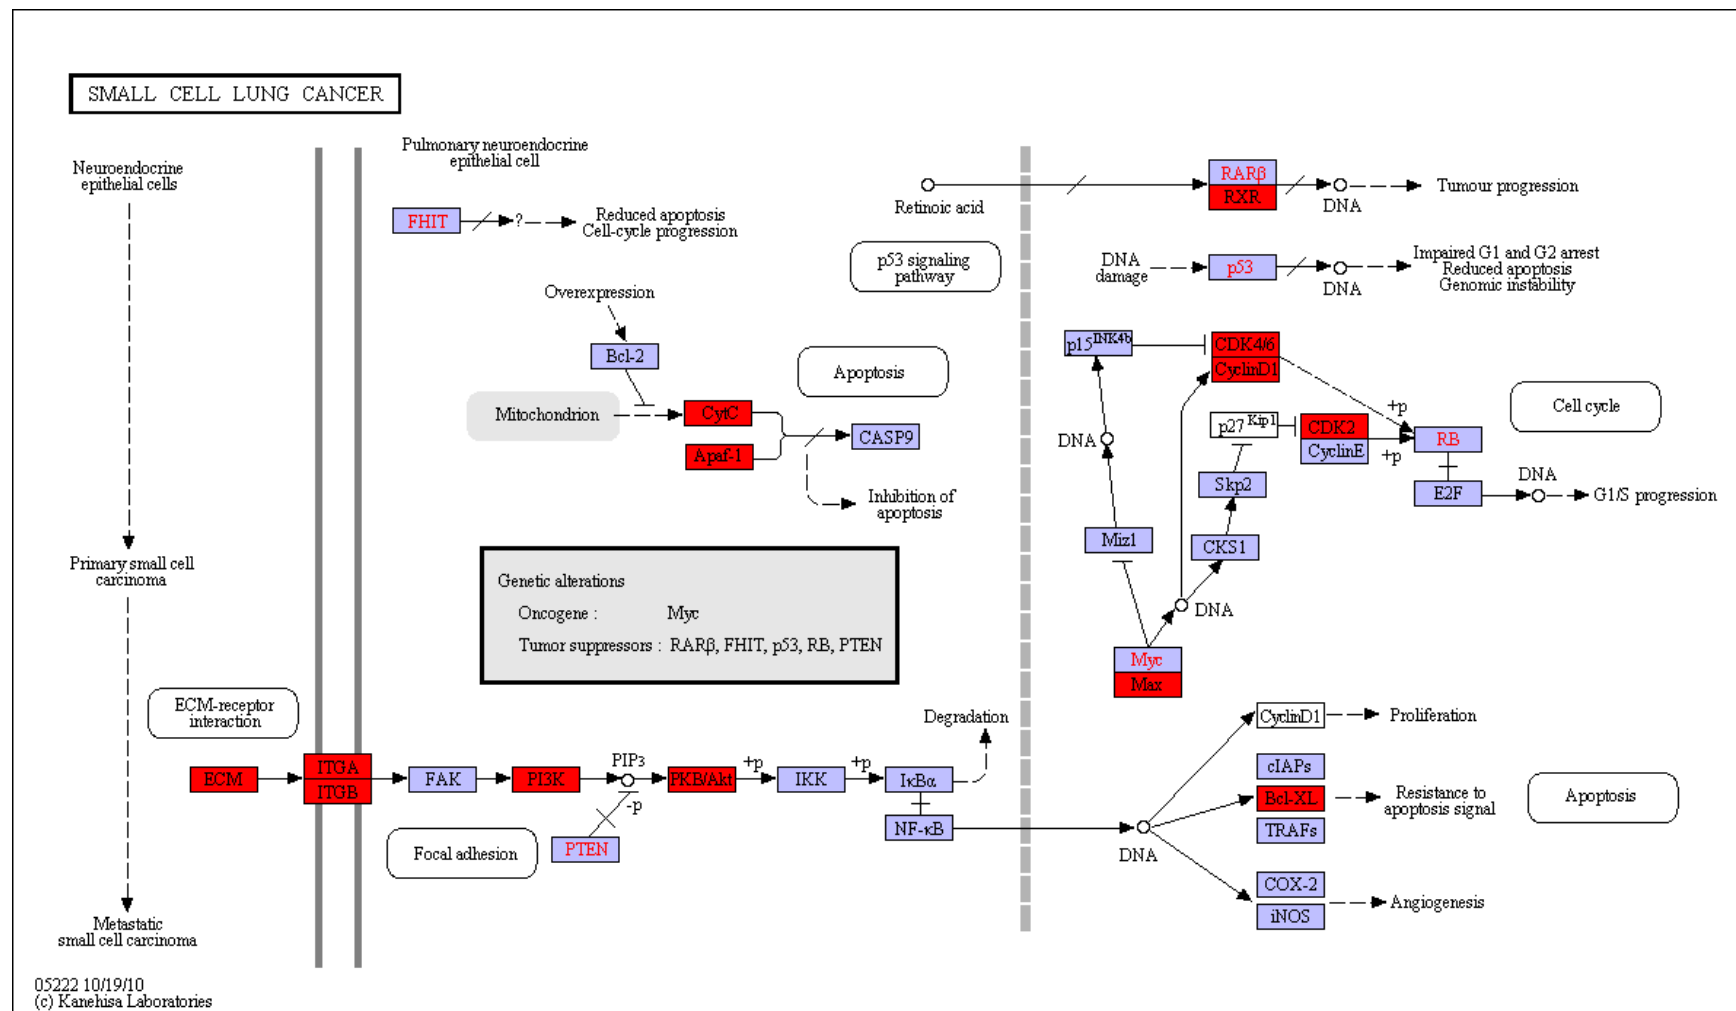

Figure 79: ko05222 Small cell lung cancer



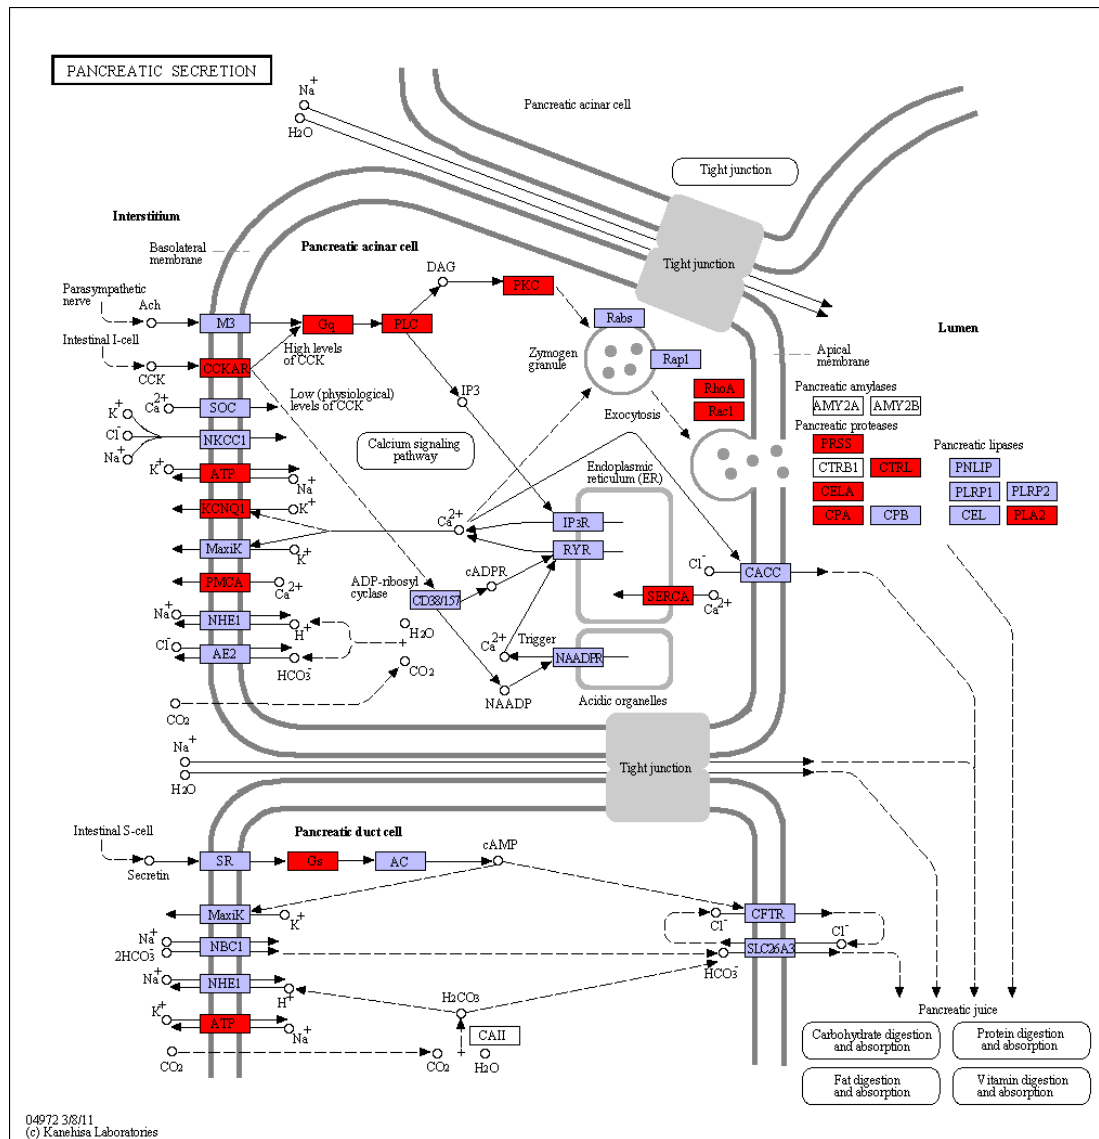

Figure 80: ko04972 Pancreatic secretion

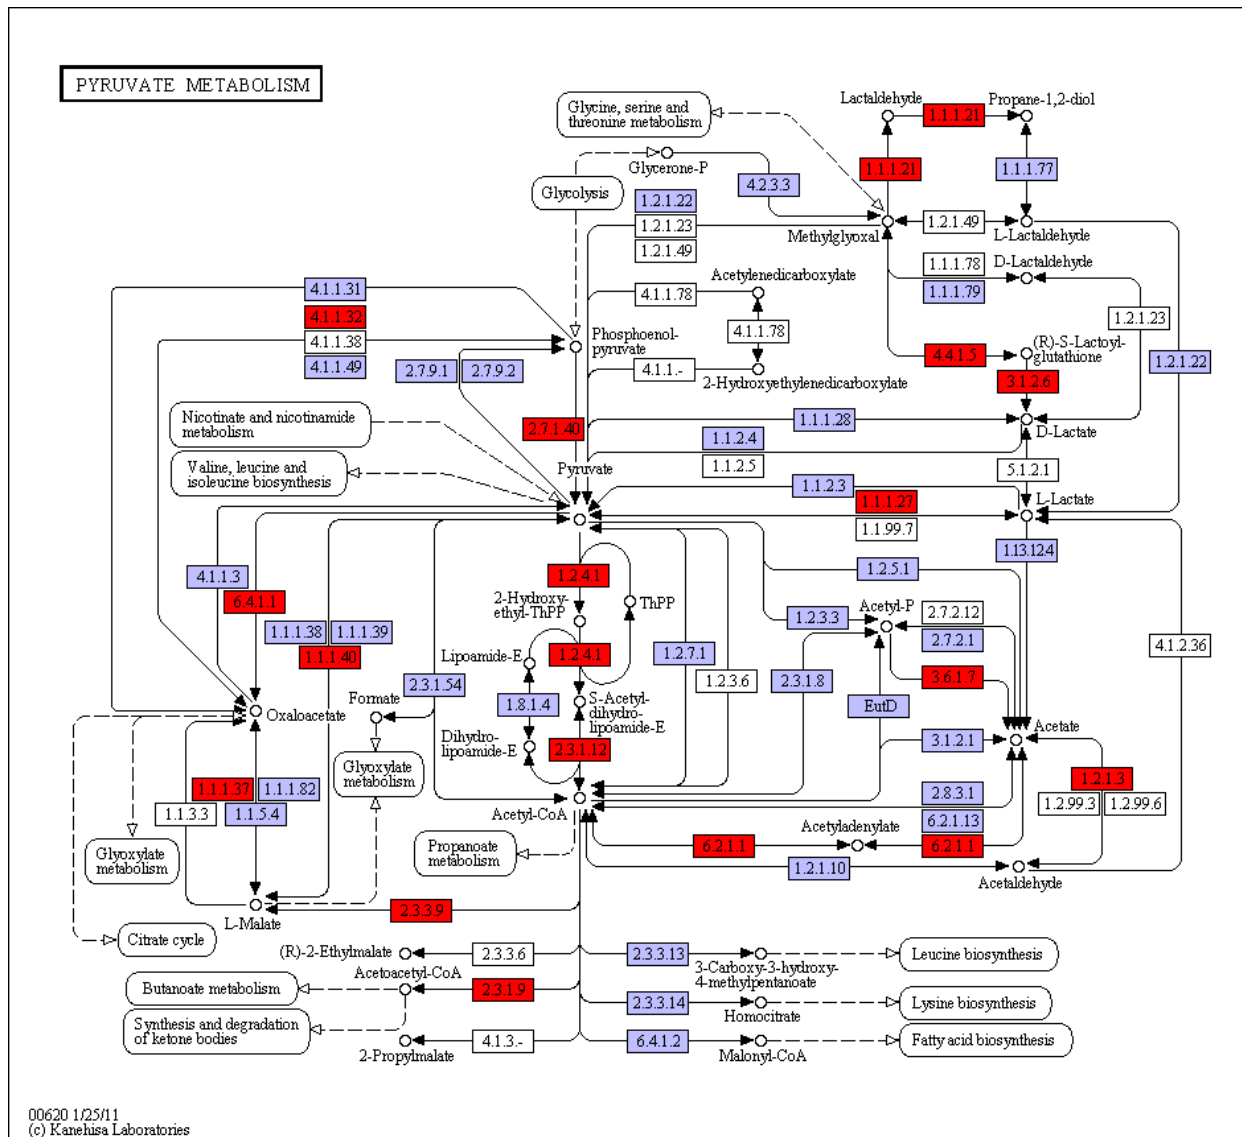

Figure 81: ko00620 Pyruvate metabolism



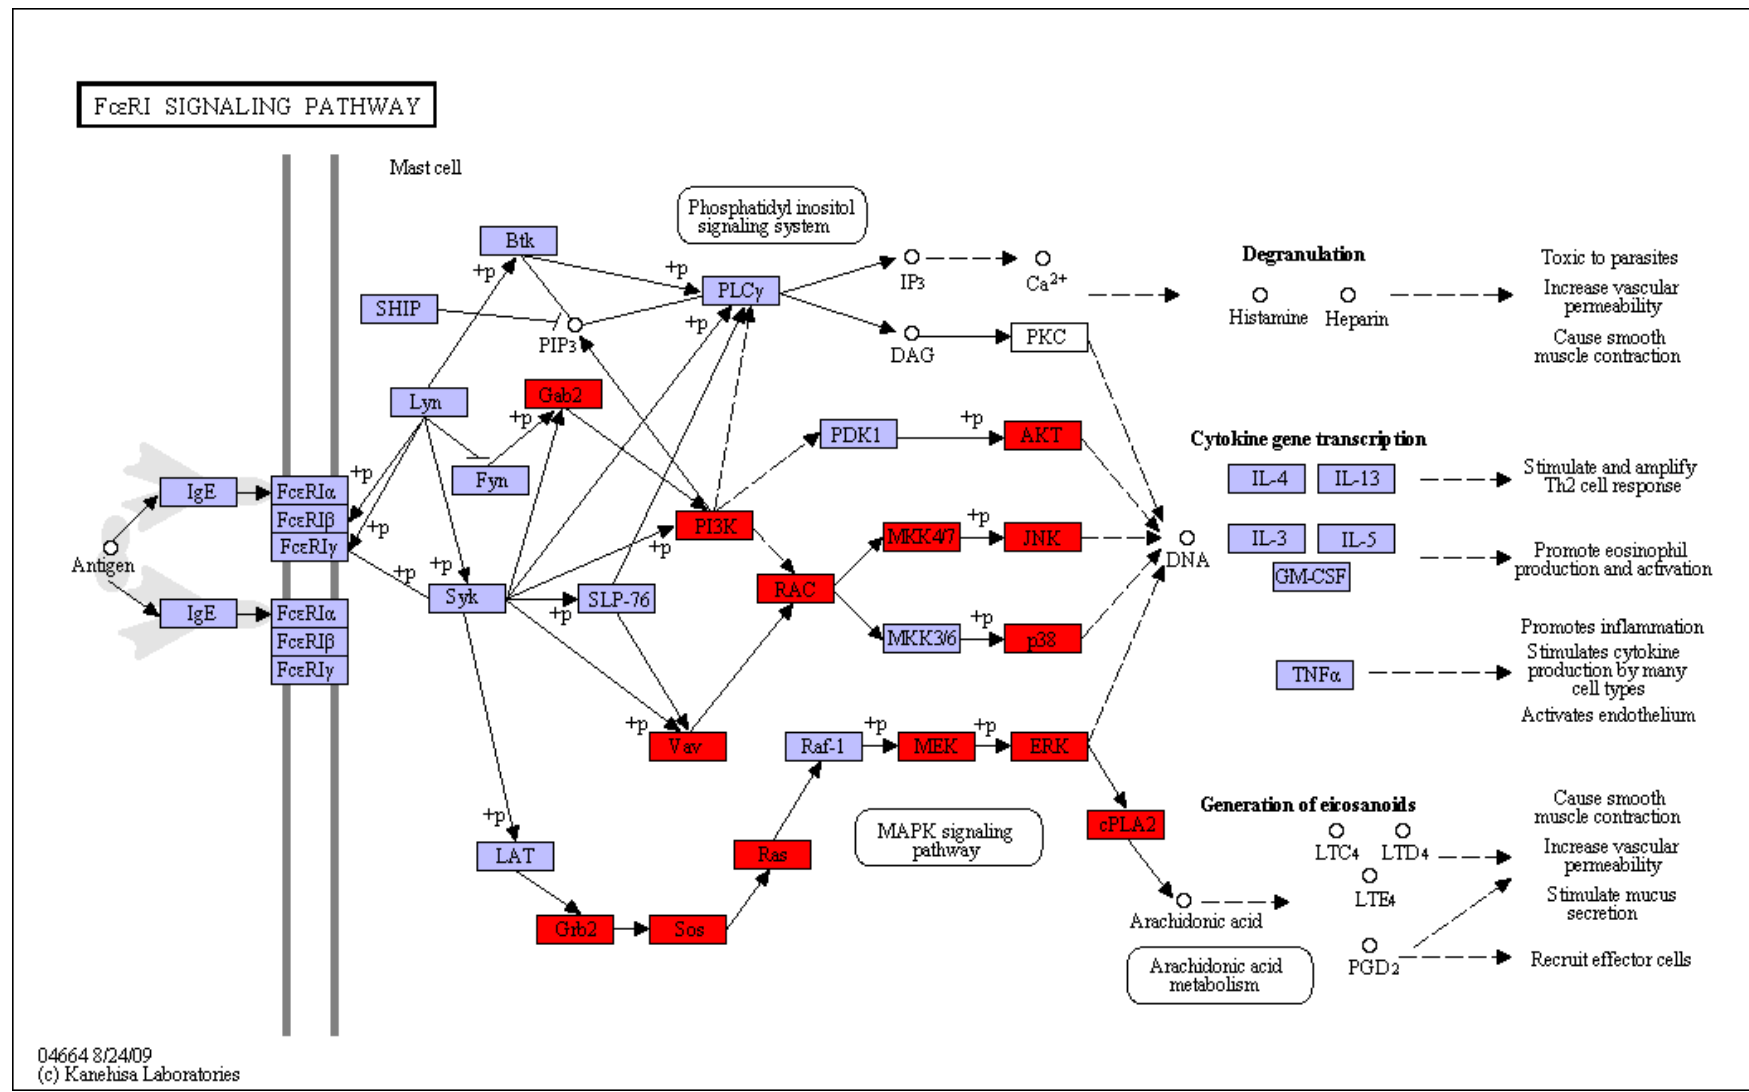

Figure 83: ko04664 Fc epsilon RI signaling pathway

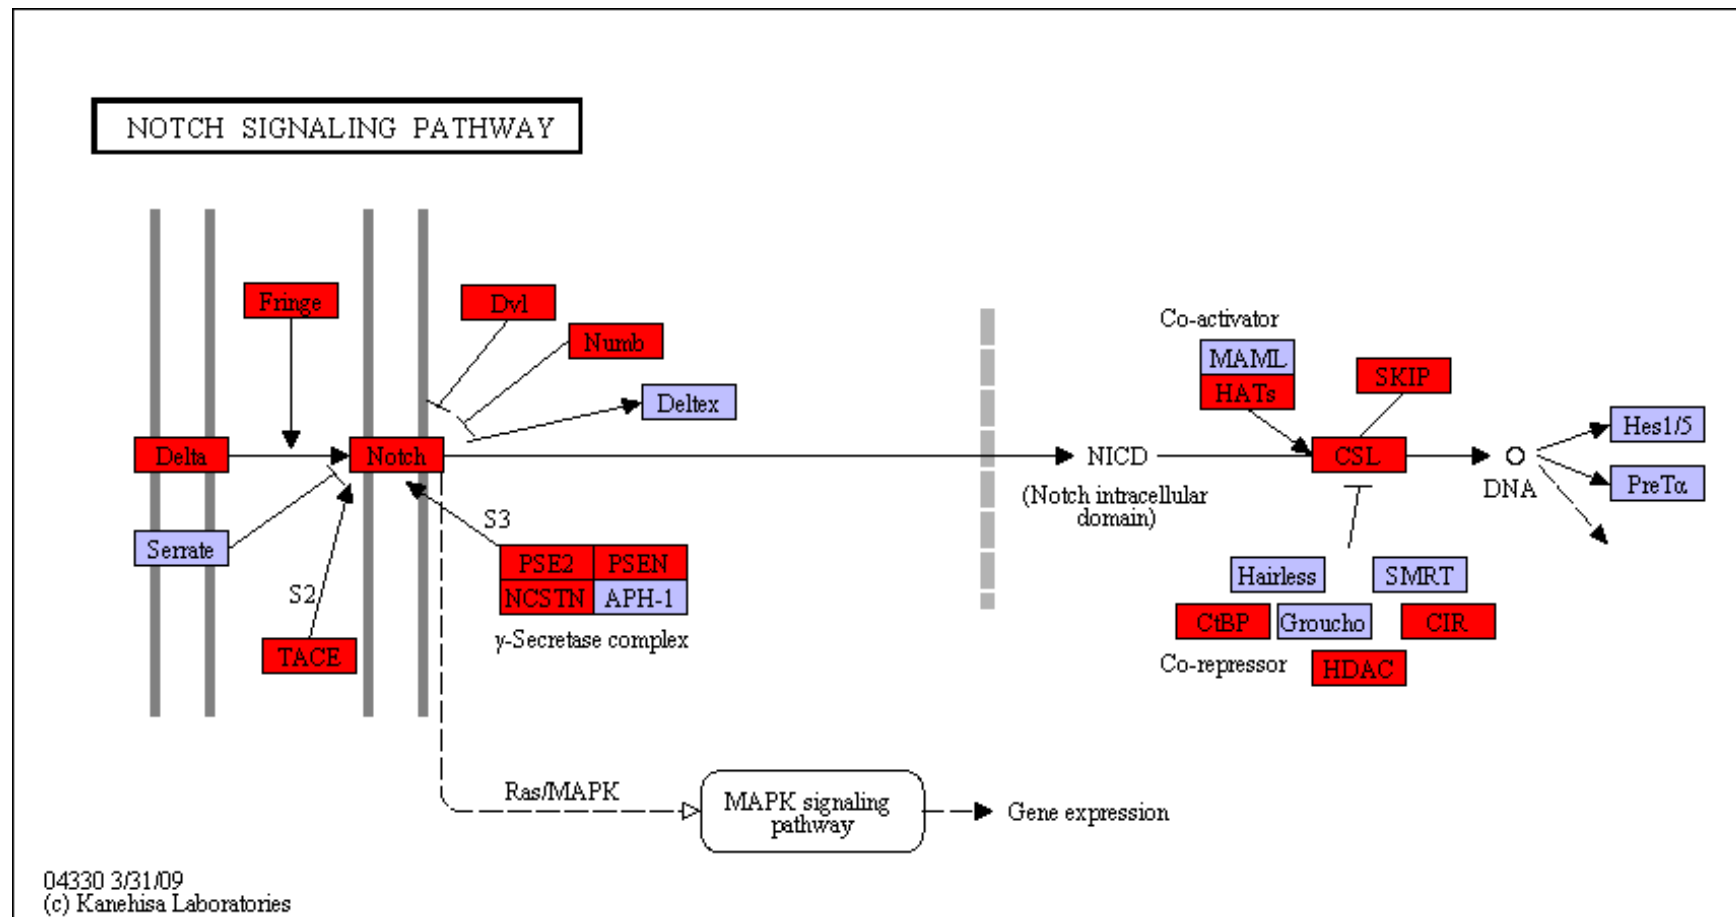

Figure 84: ko04330 Notch signaling pathway

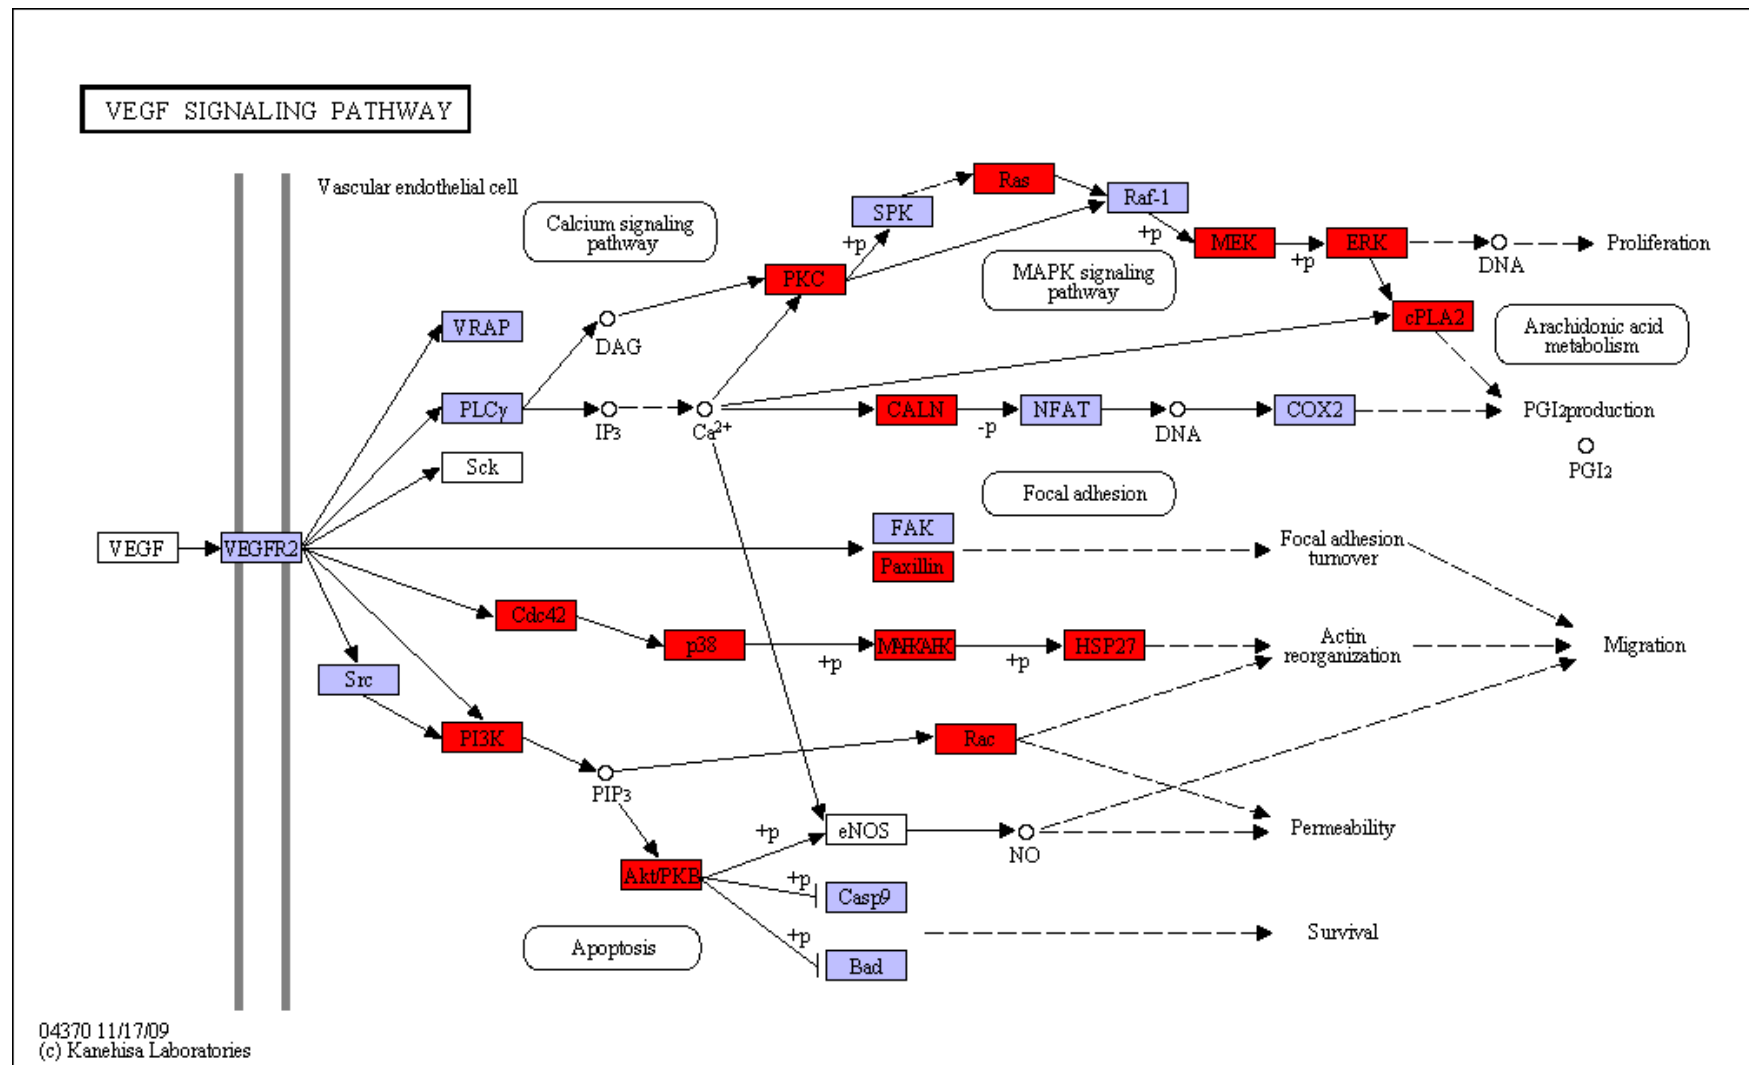

Figure 85: ko04370 VEGF signaling pathway

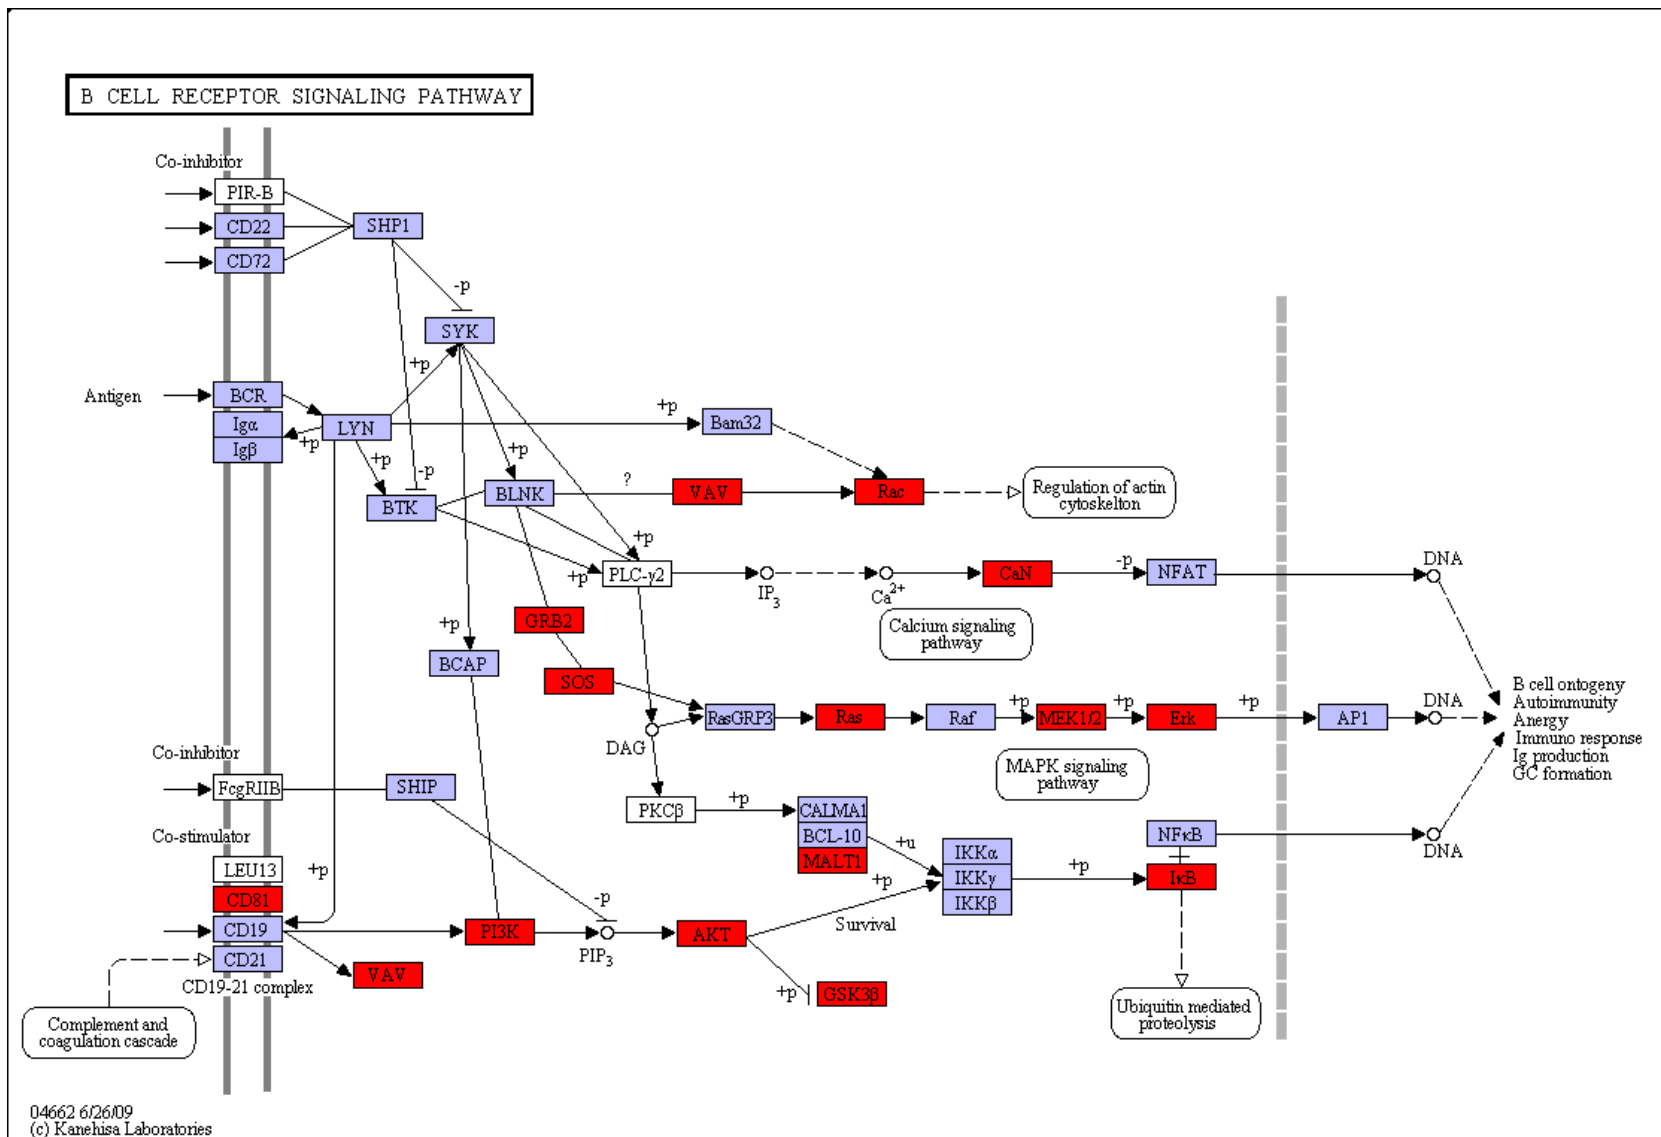

Figure 86: ko04662 B cell receptor signaling pathway

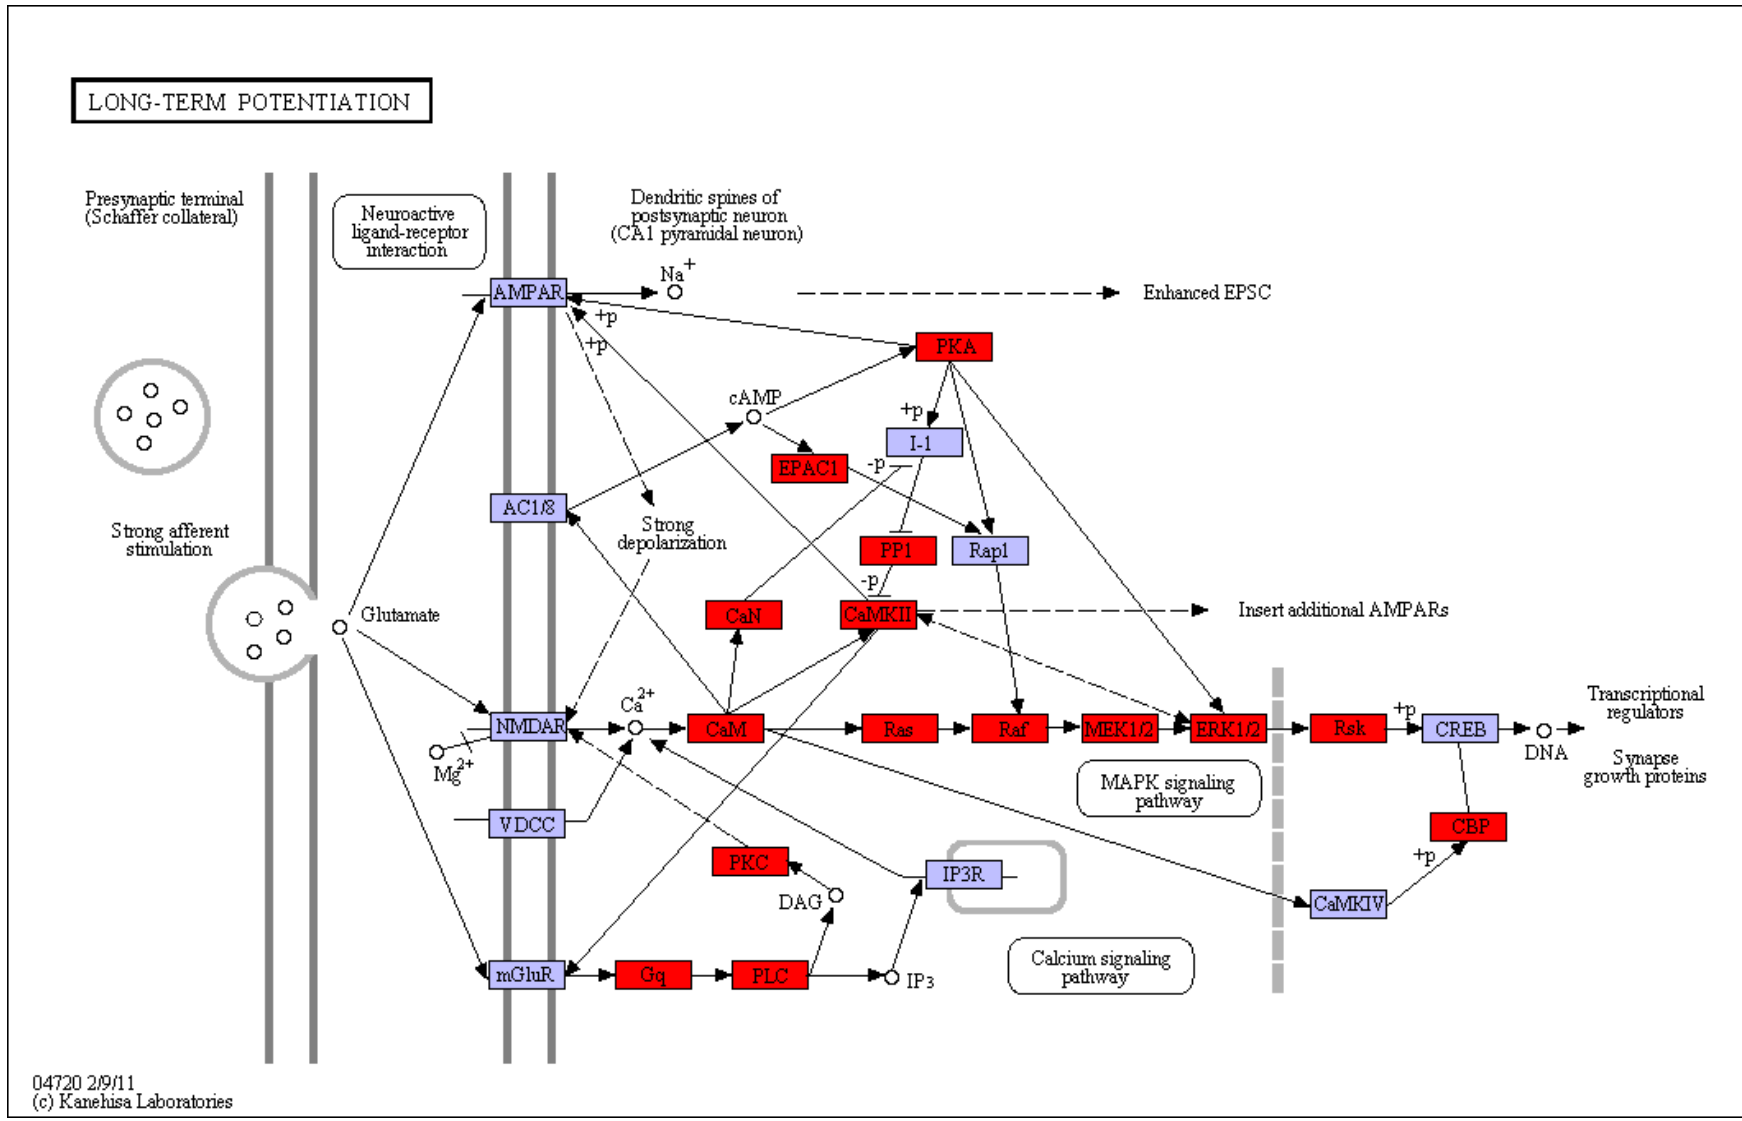

Figure 87: ko04720 Long-term potentiation



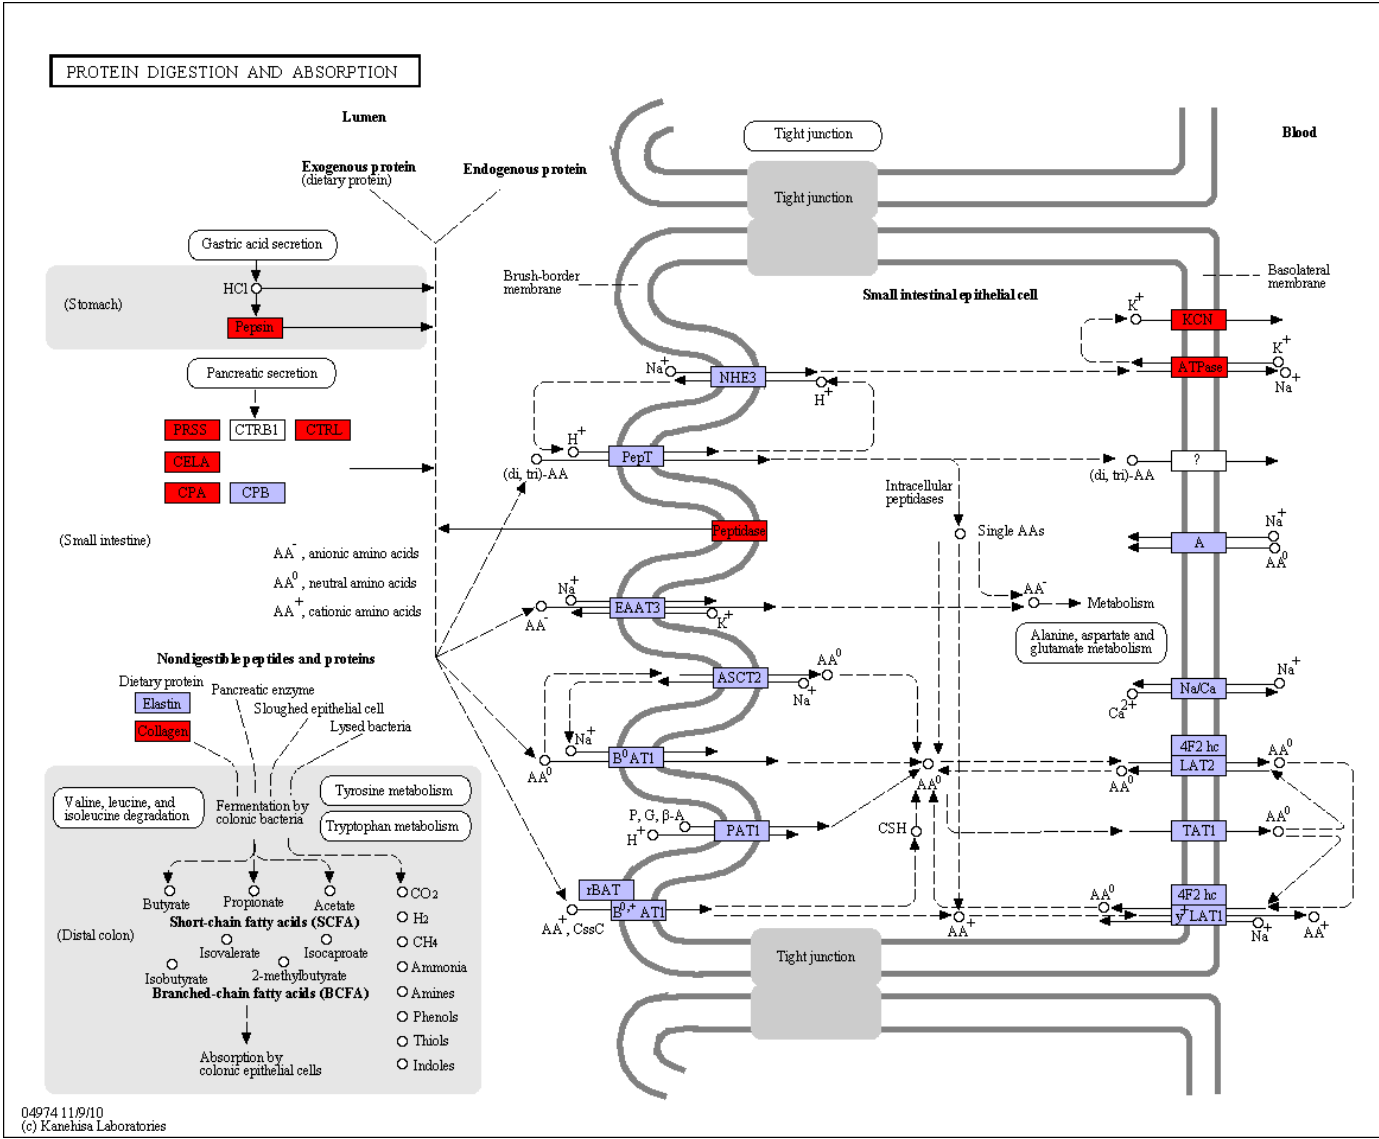

Figure 88: ko04974 Protein digestion and absorption



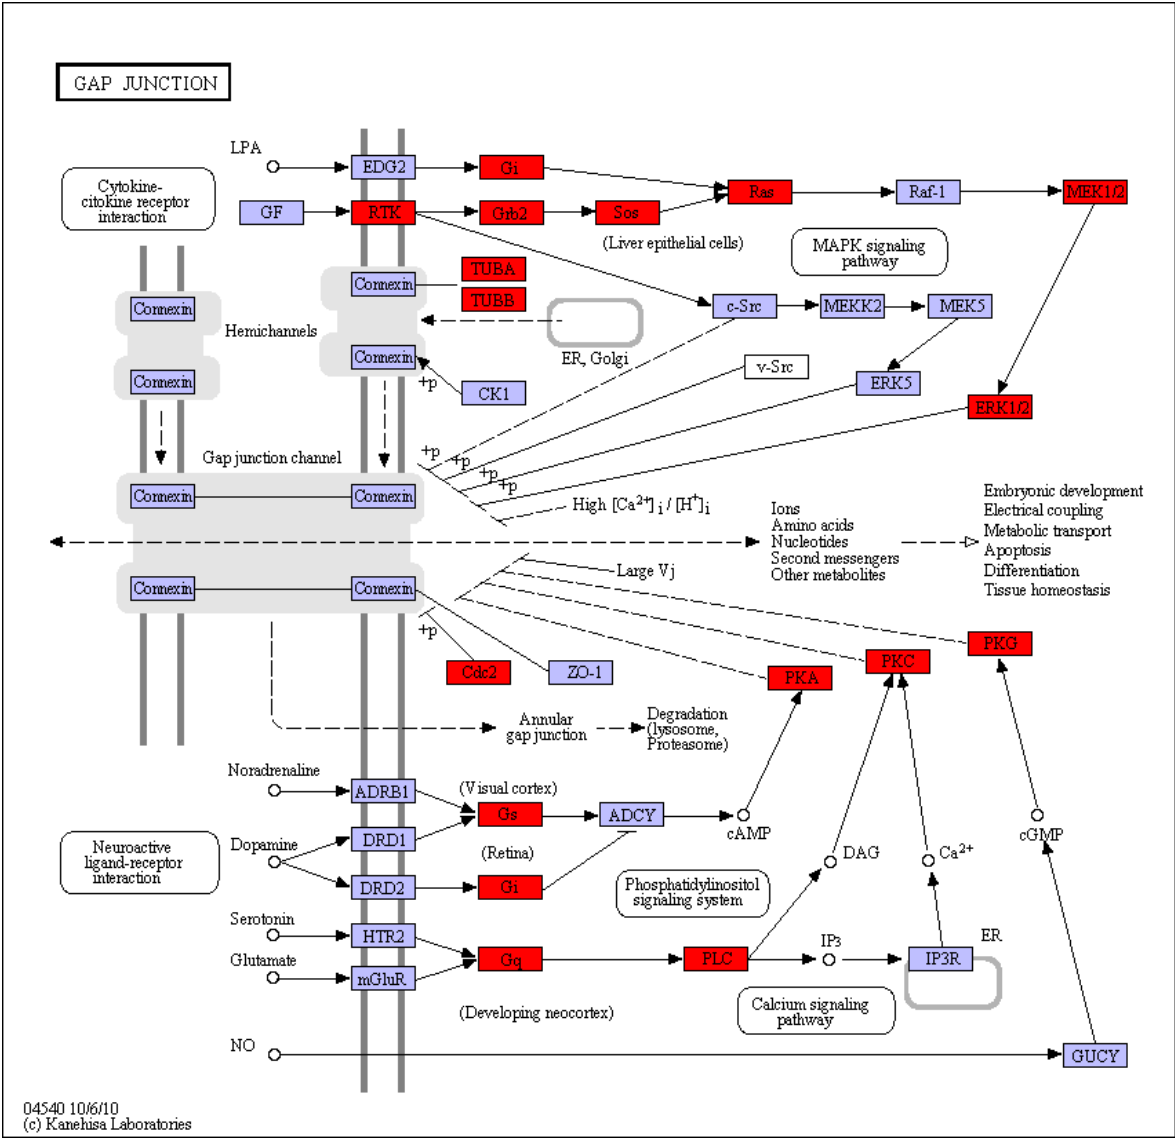

Figure 90: ko04540 Gap junction

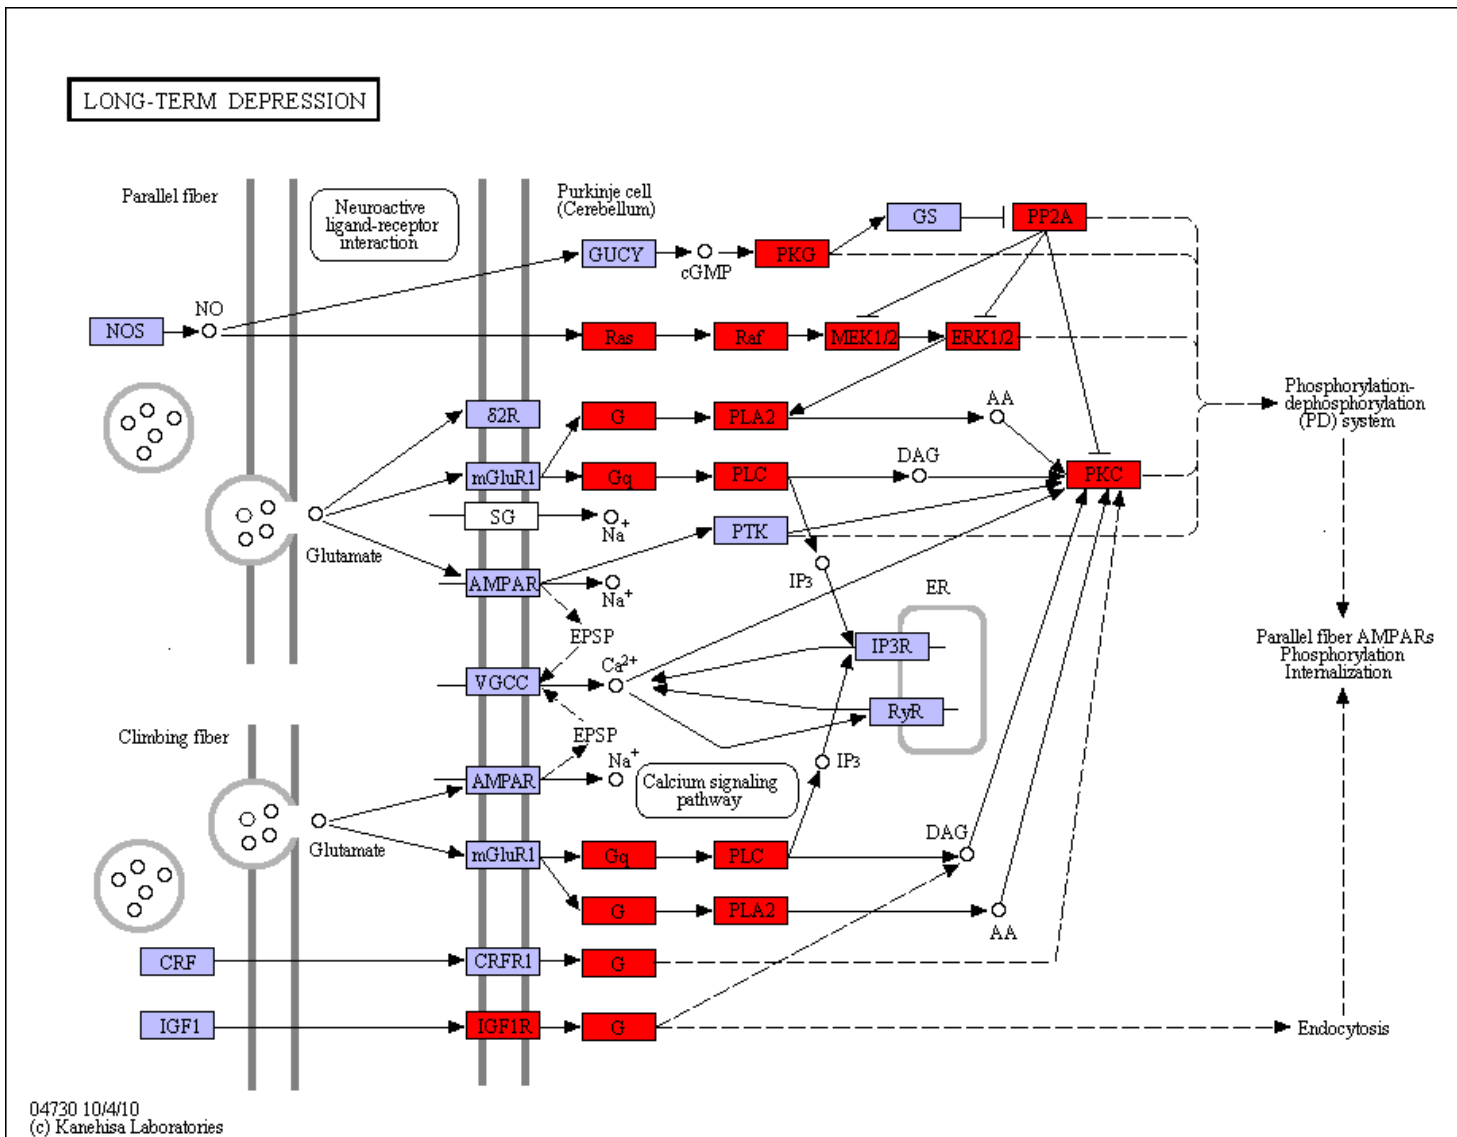

Figure 91: ko04730 Long-term depression

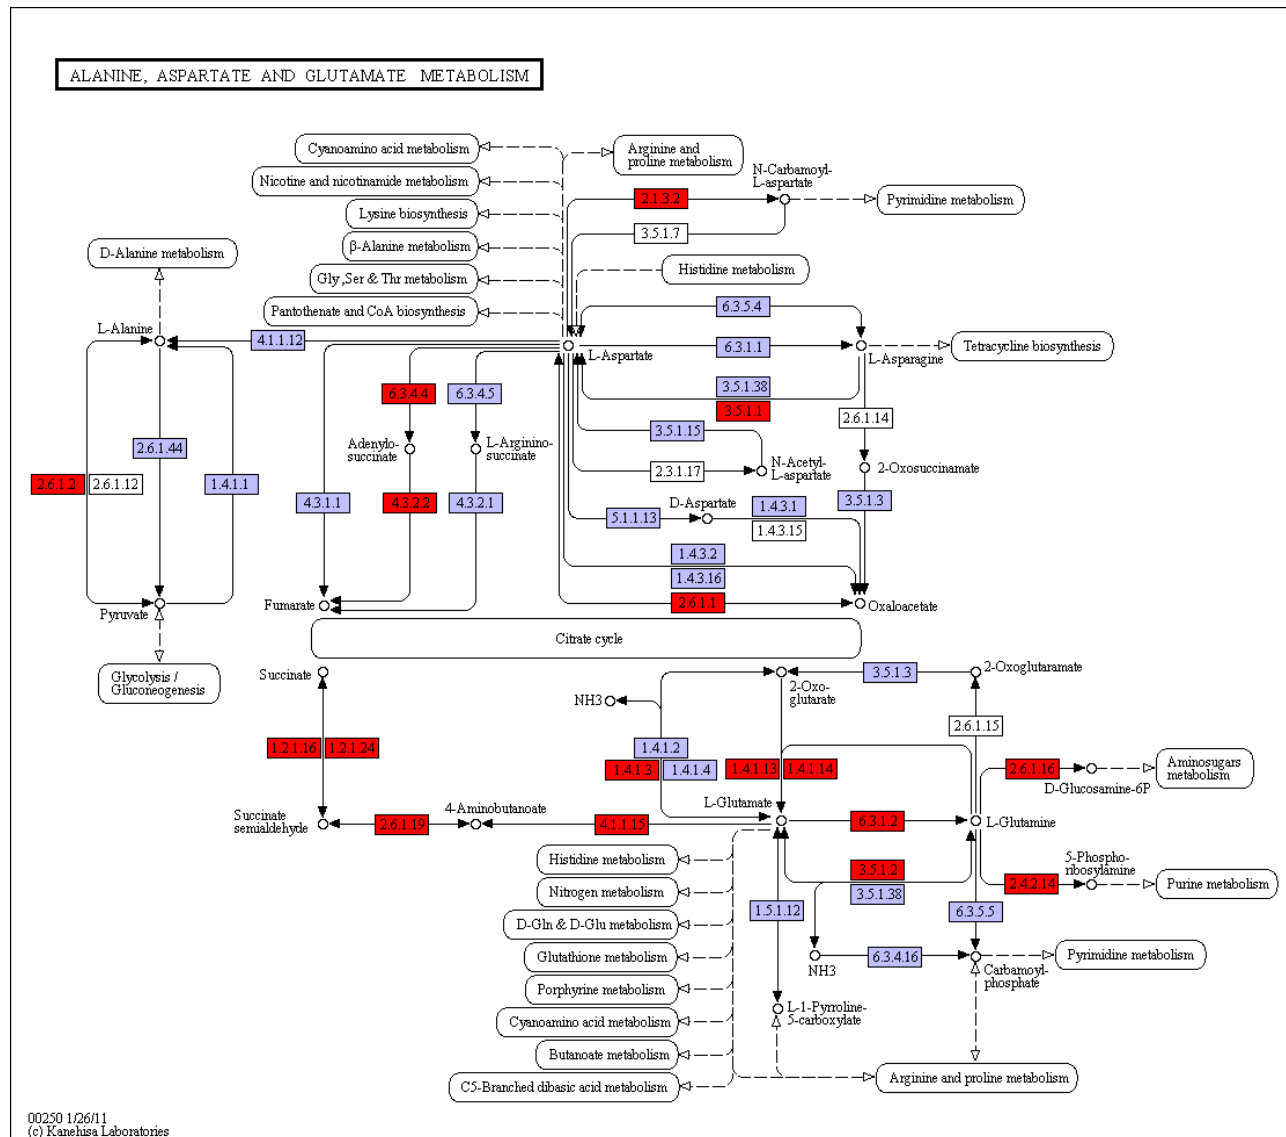

Figure 92: ko00250 Alanine, aspartate and glutamate metabolism

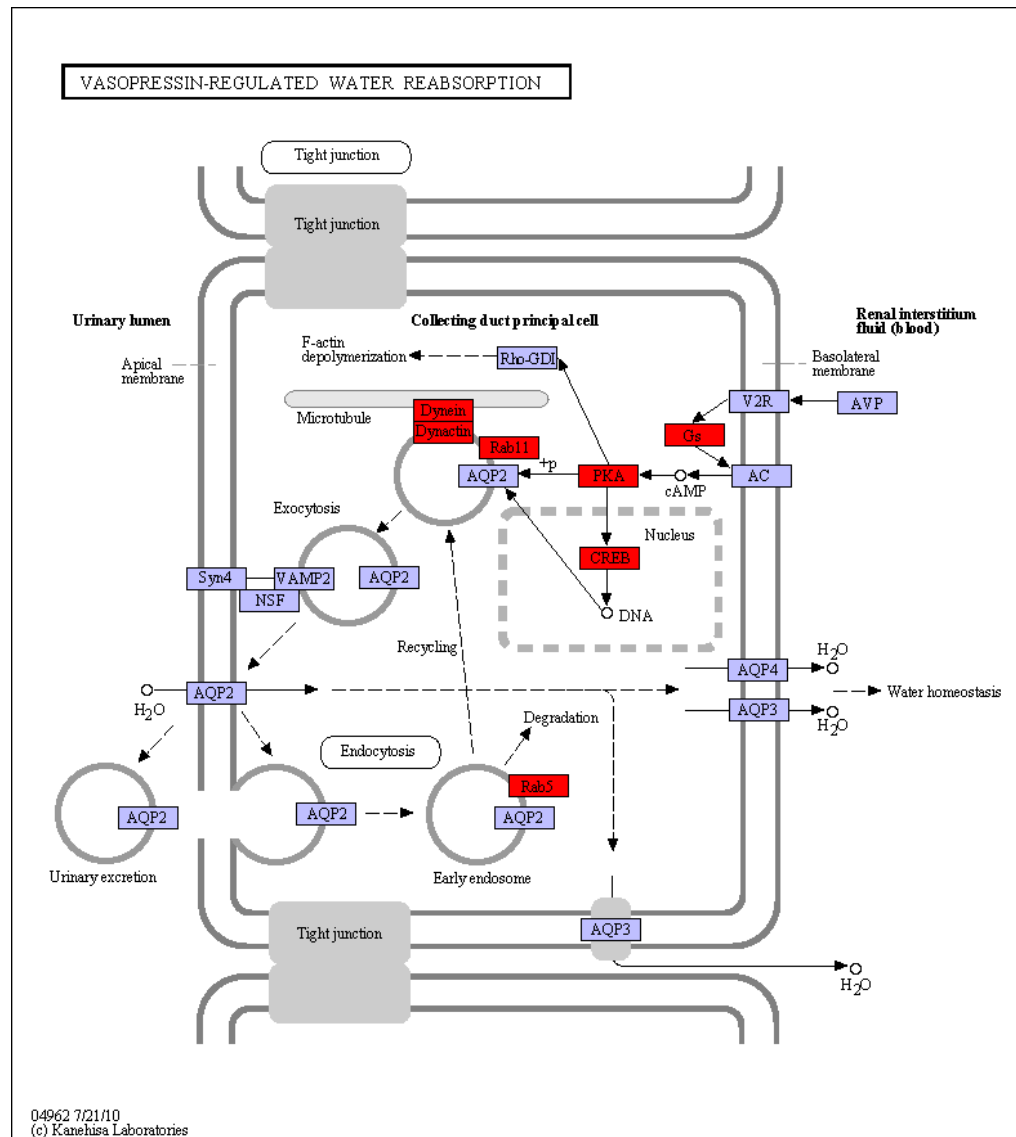

Figure 93: ko04962 Vasopressin-regulated water reabsorption

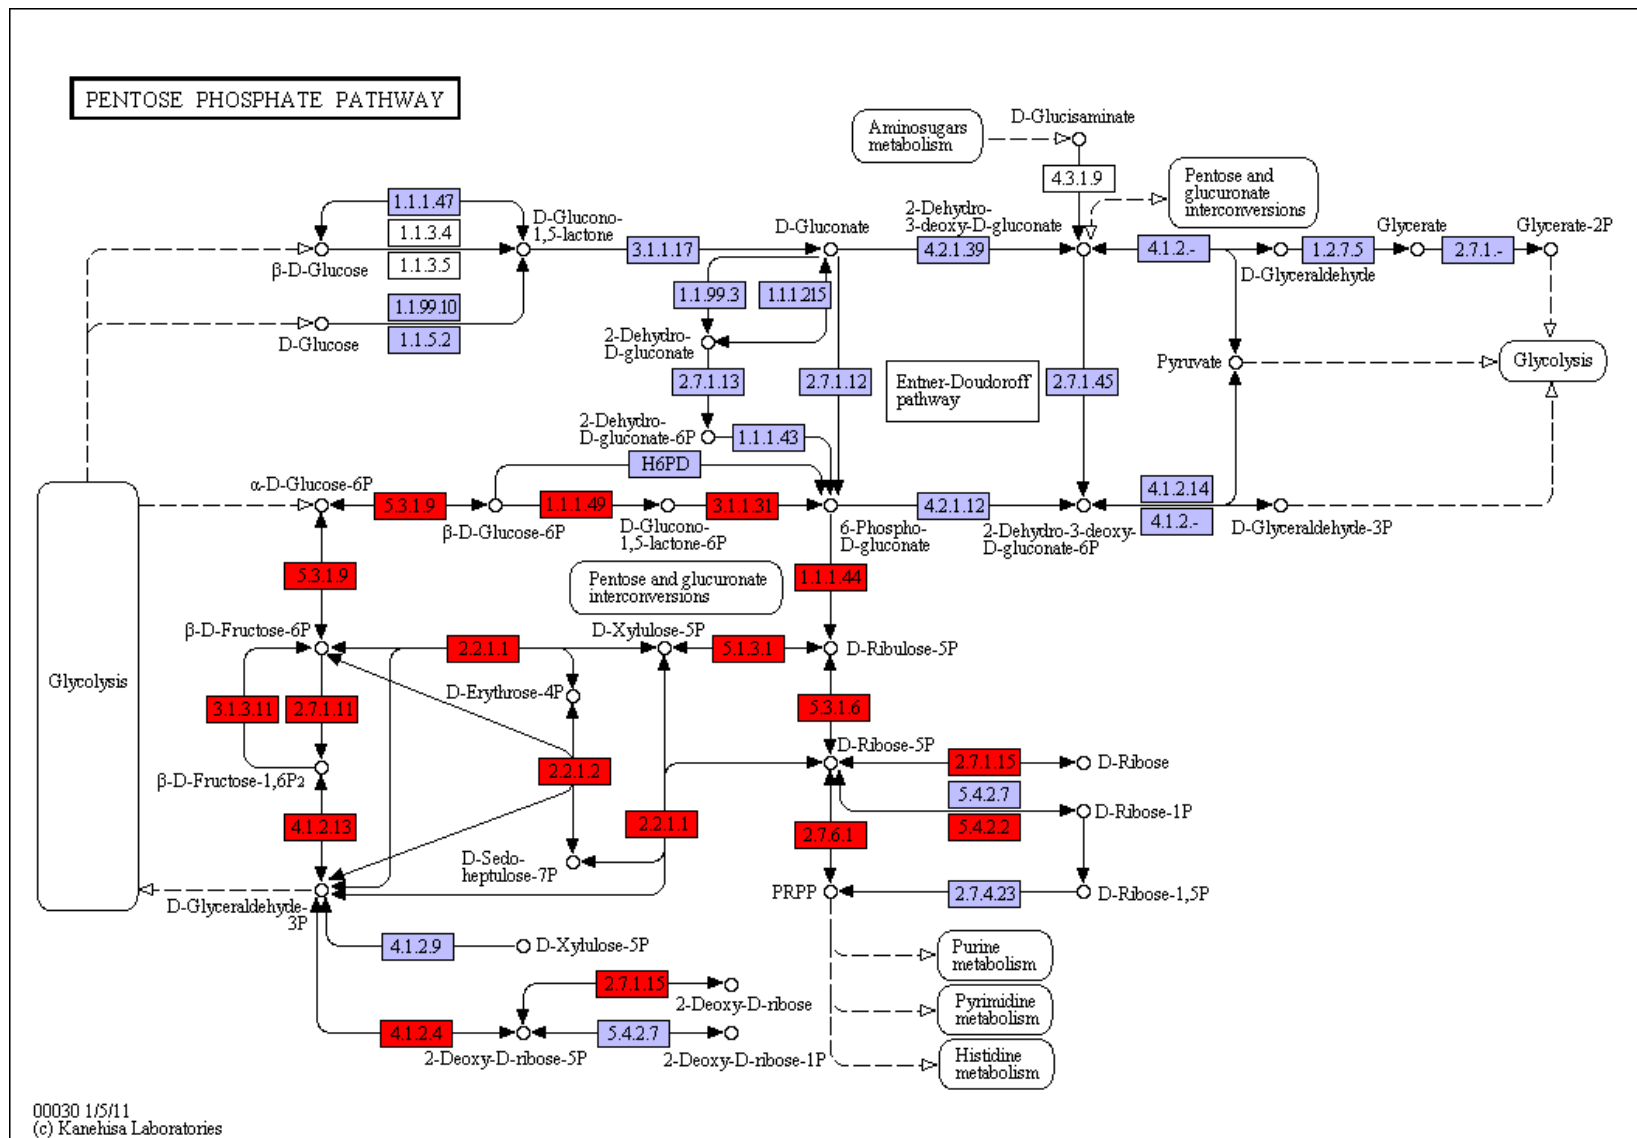

Figure 94: ko00030 Pentose phosphate pathway







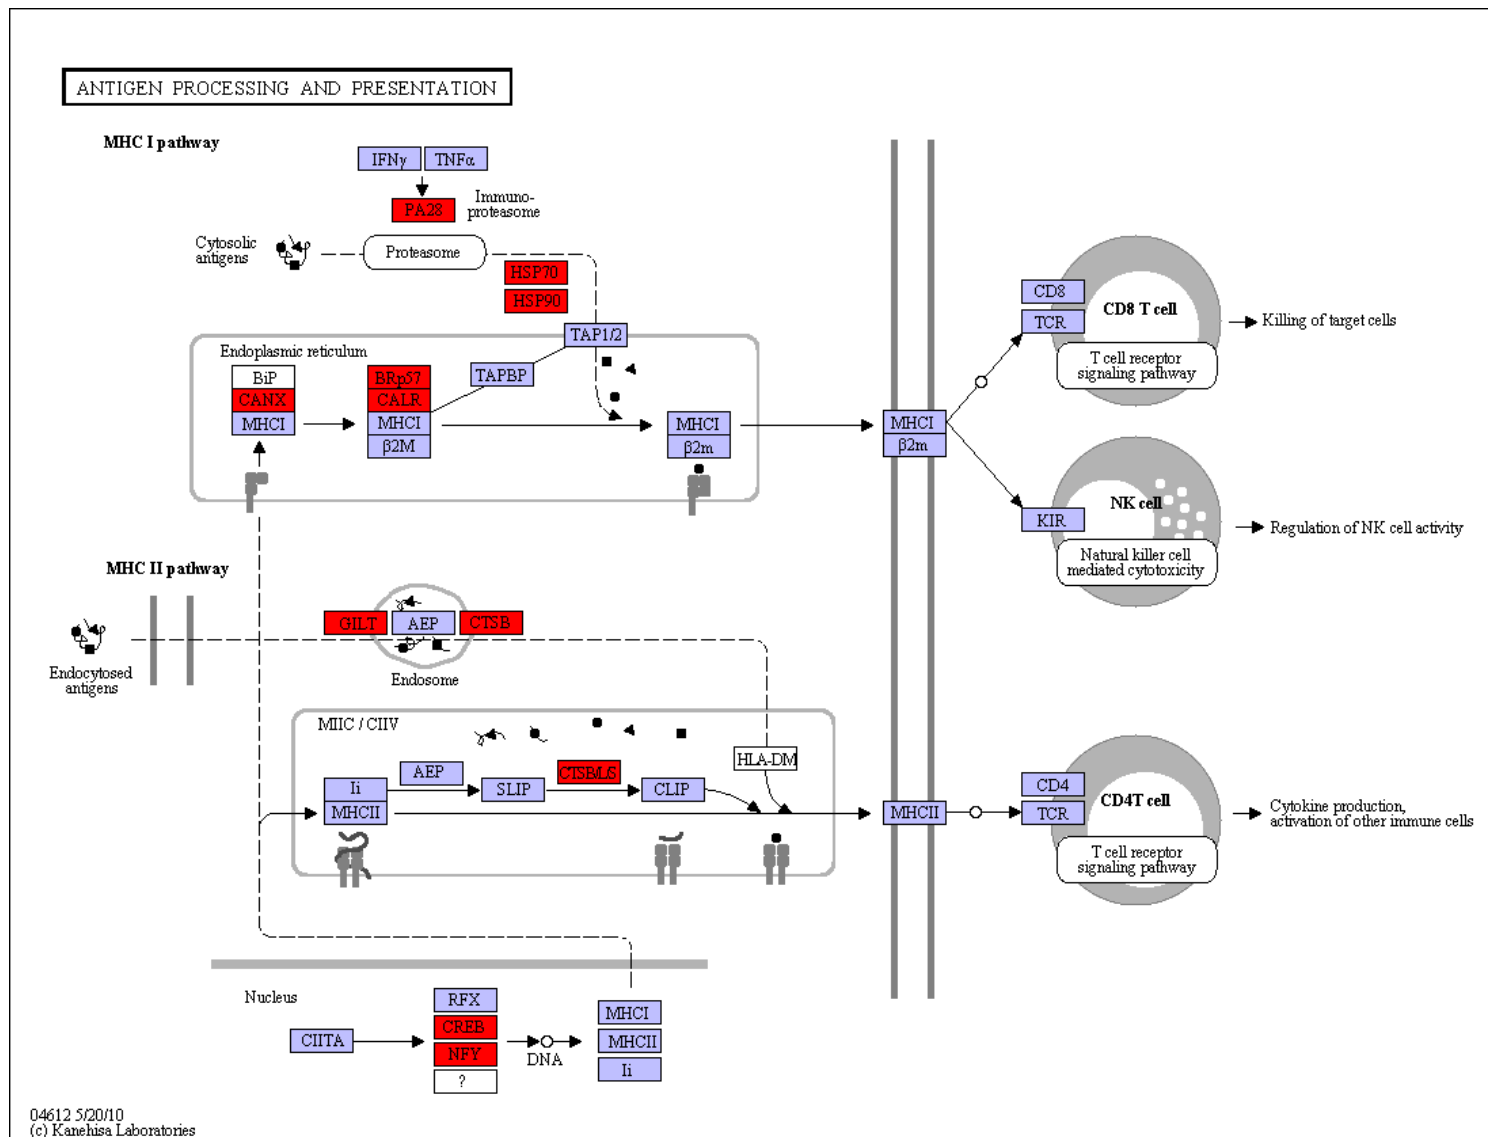

Figure 97: ko04612 Antigen processing and presentation

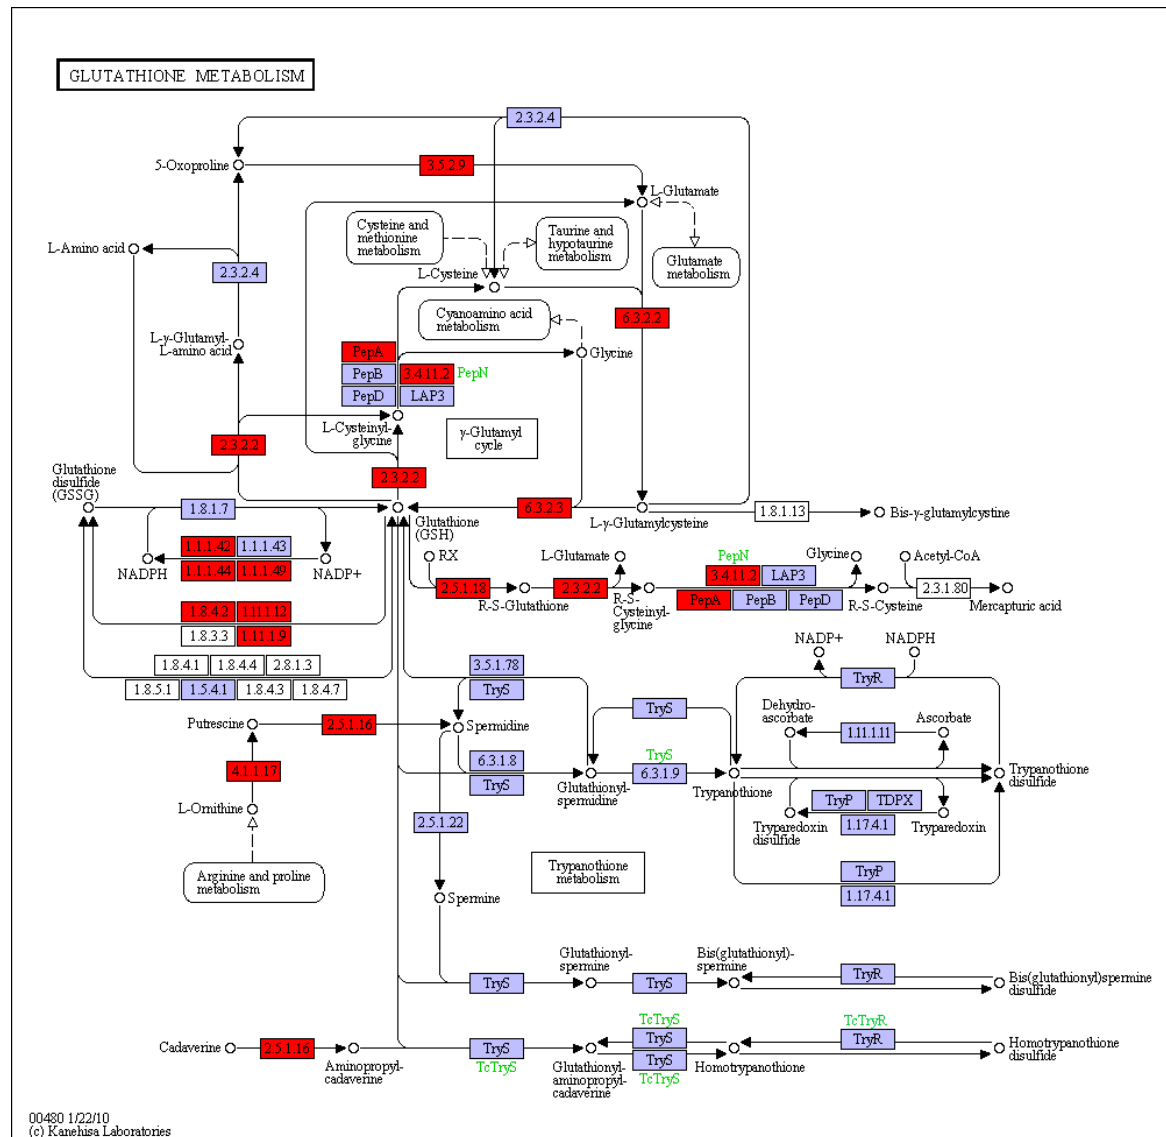

Figure 98: ko00480 Glutathione metabolism

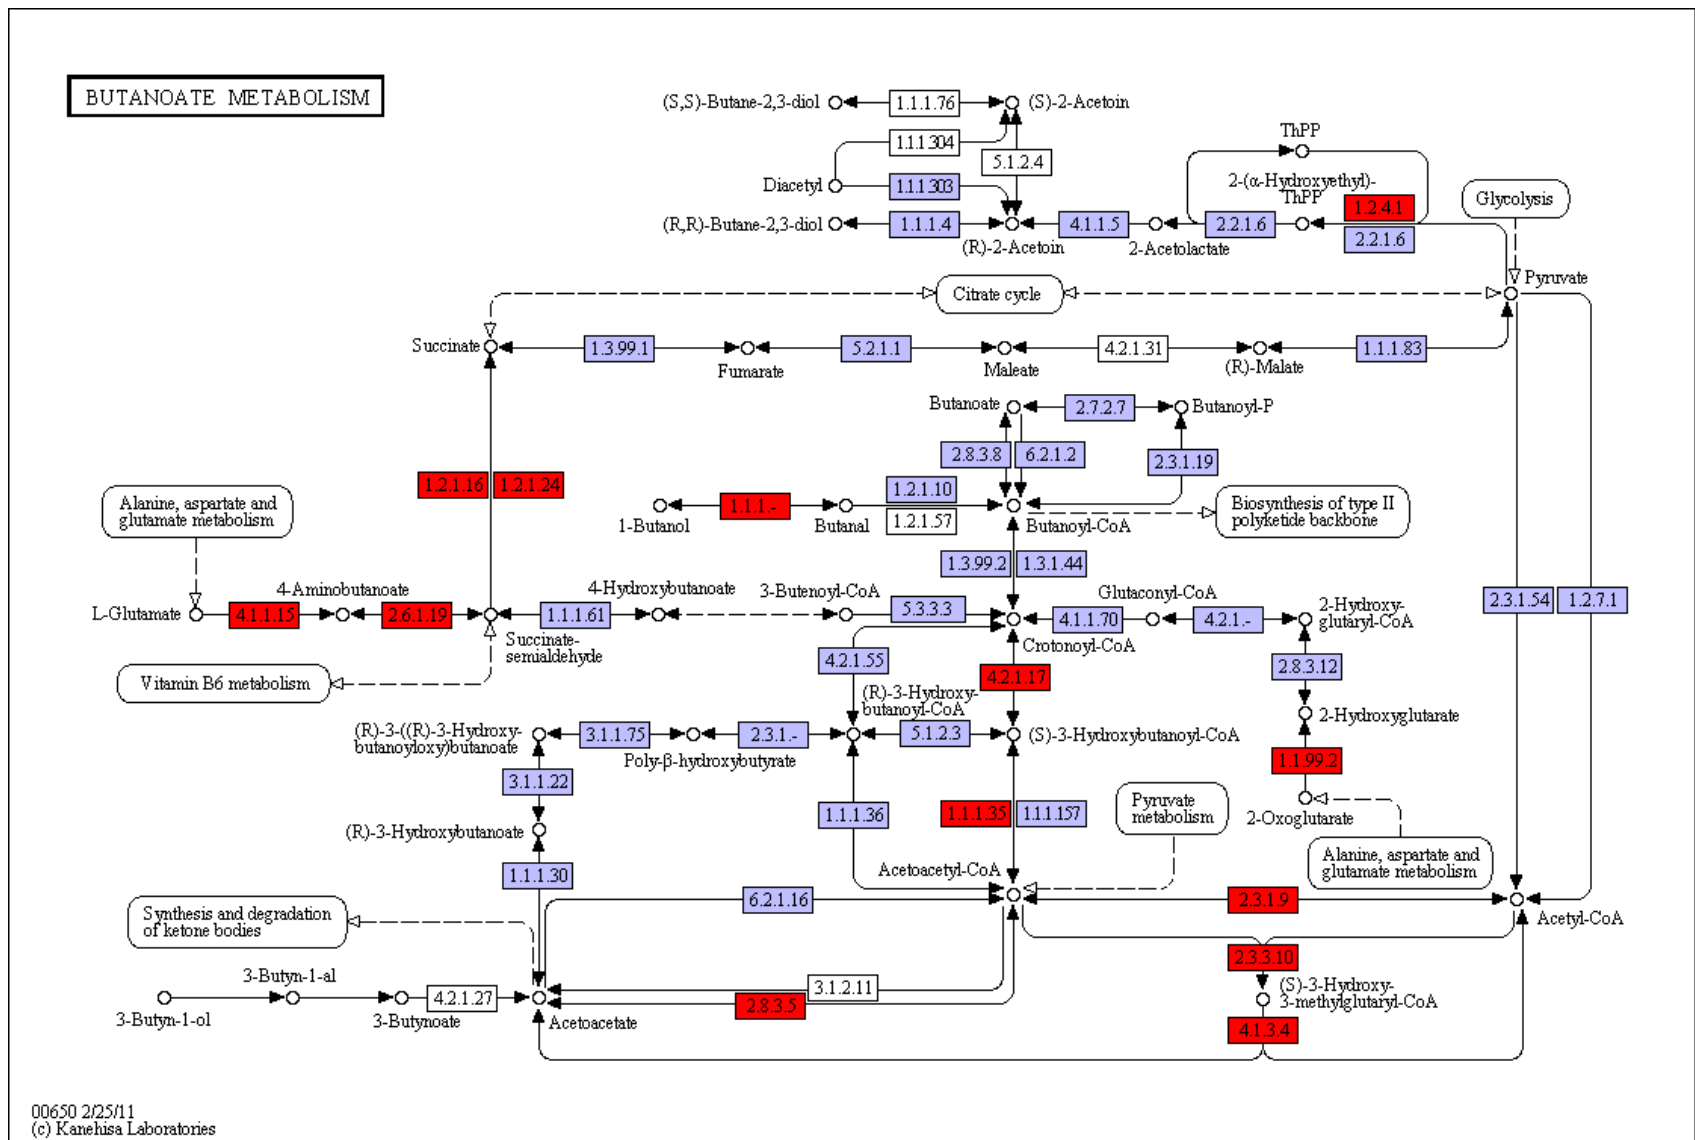

Figure 99: ko00650 Butanoate metabolism

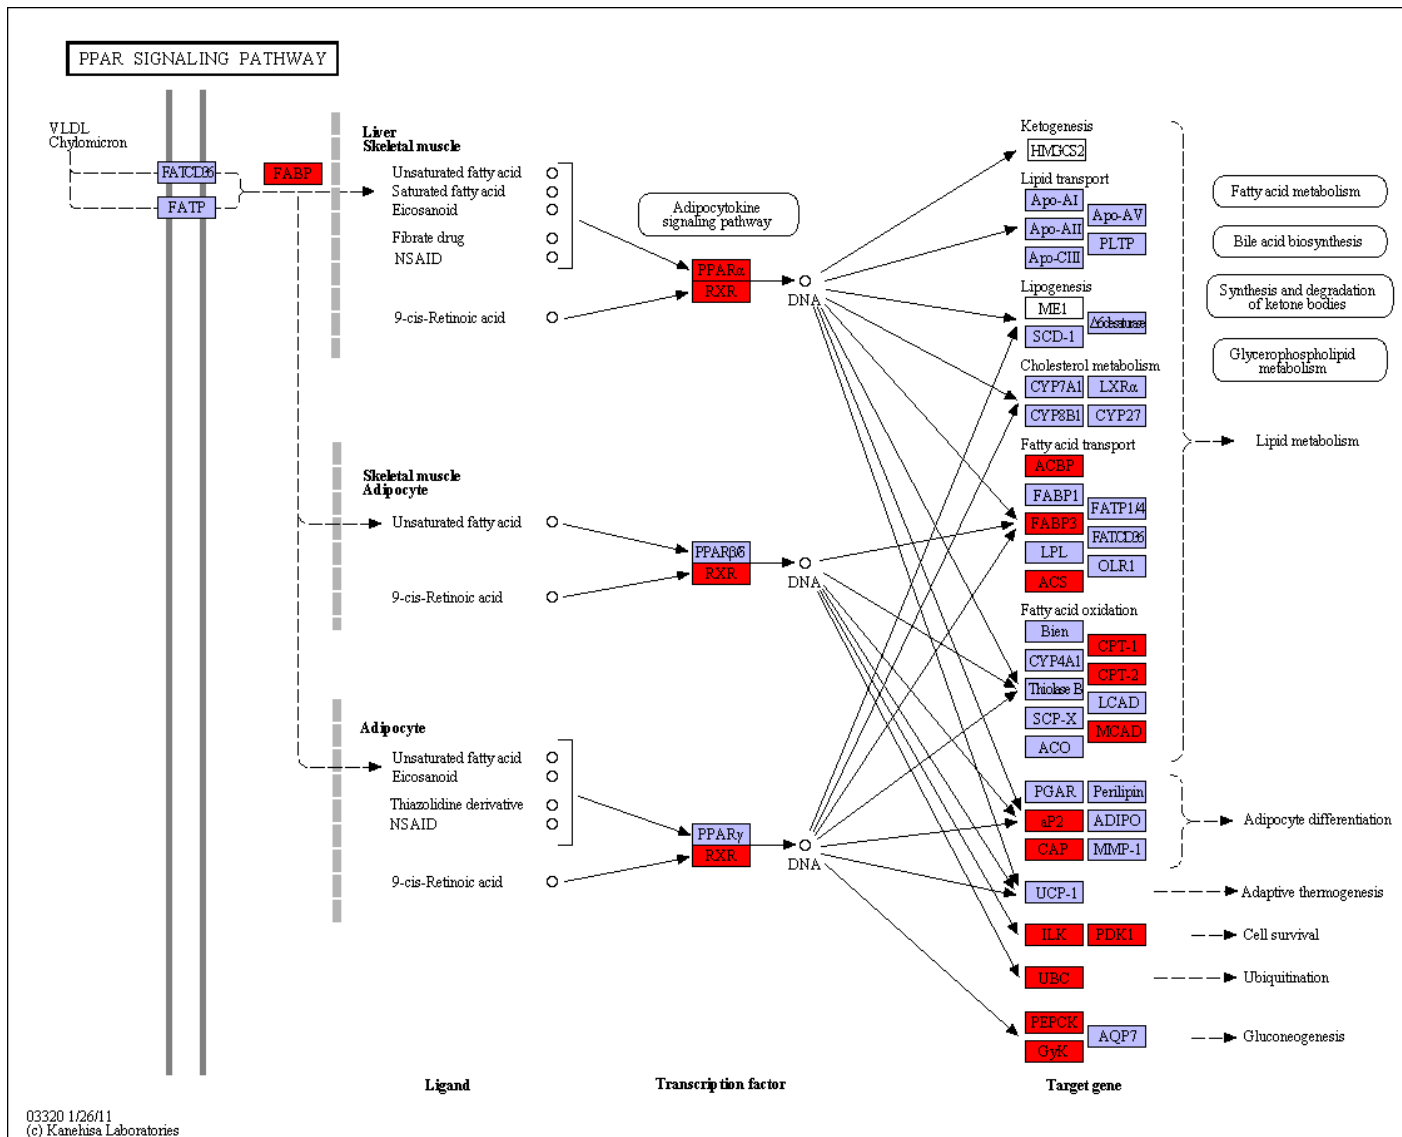

Figure 100: ko03320 PPAR signaling pathway

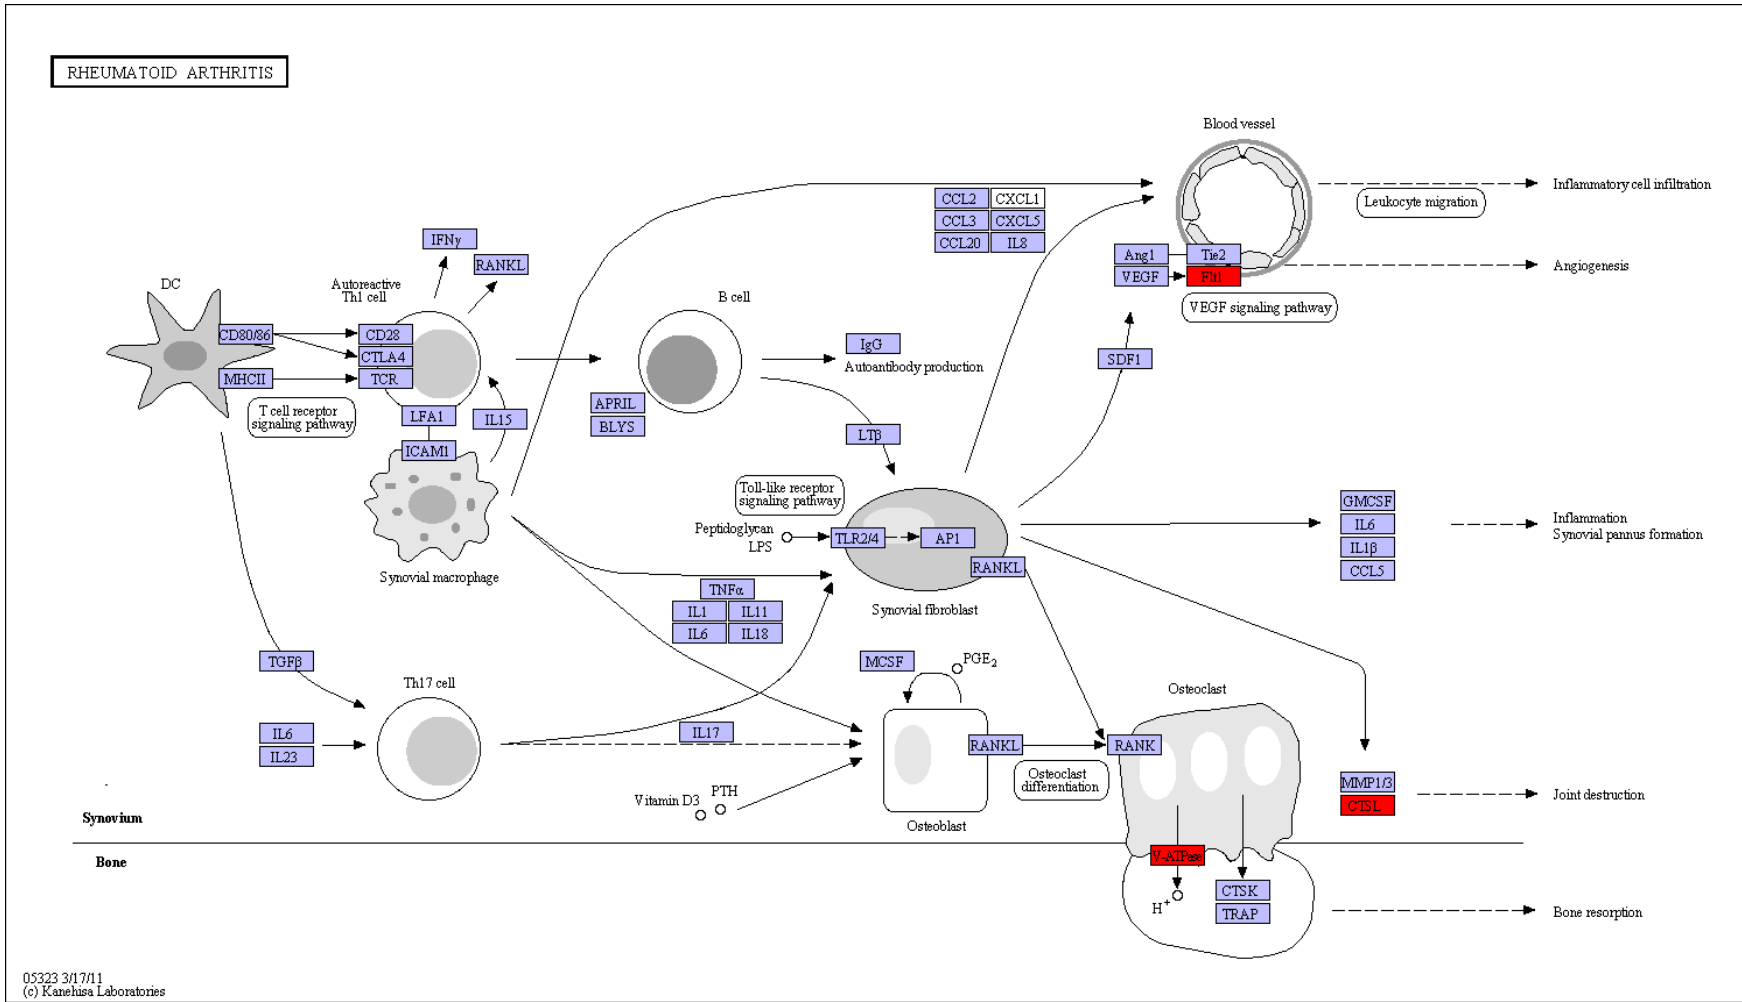

Figure 101: ko05323 Rheumatoid arthritis

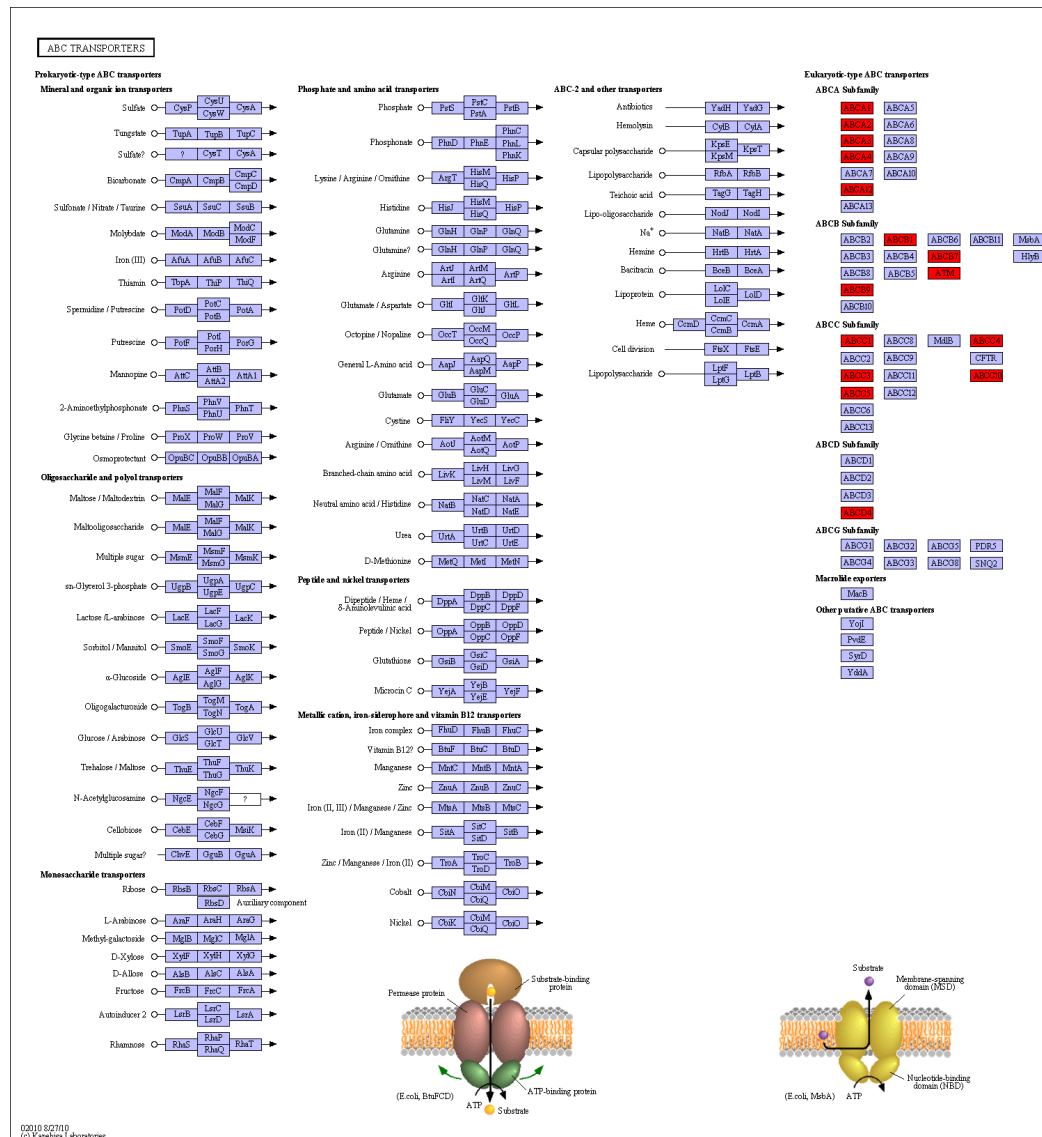

Figure 102: ko02010 ABC transporters

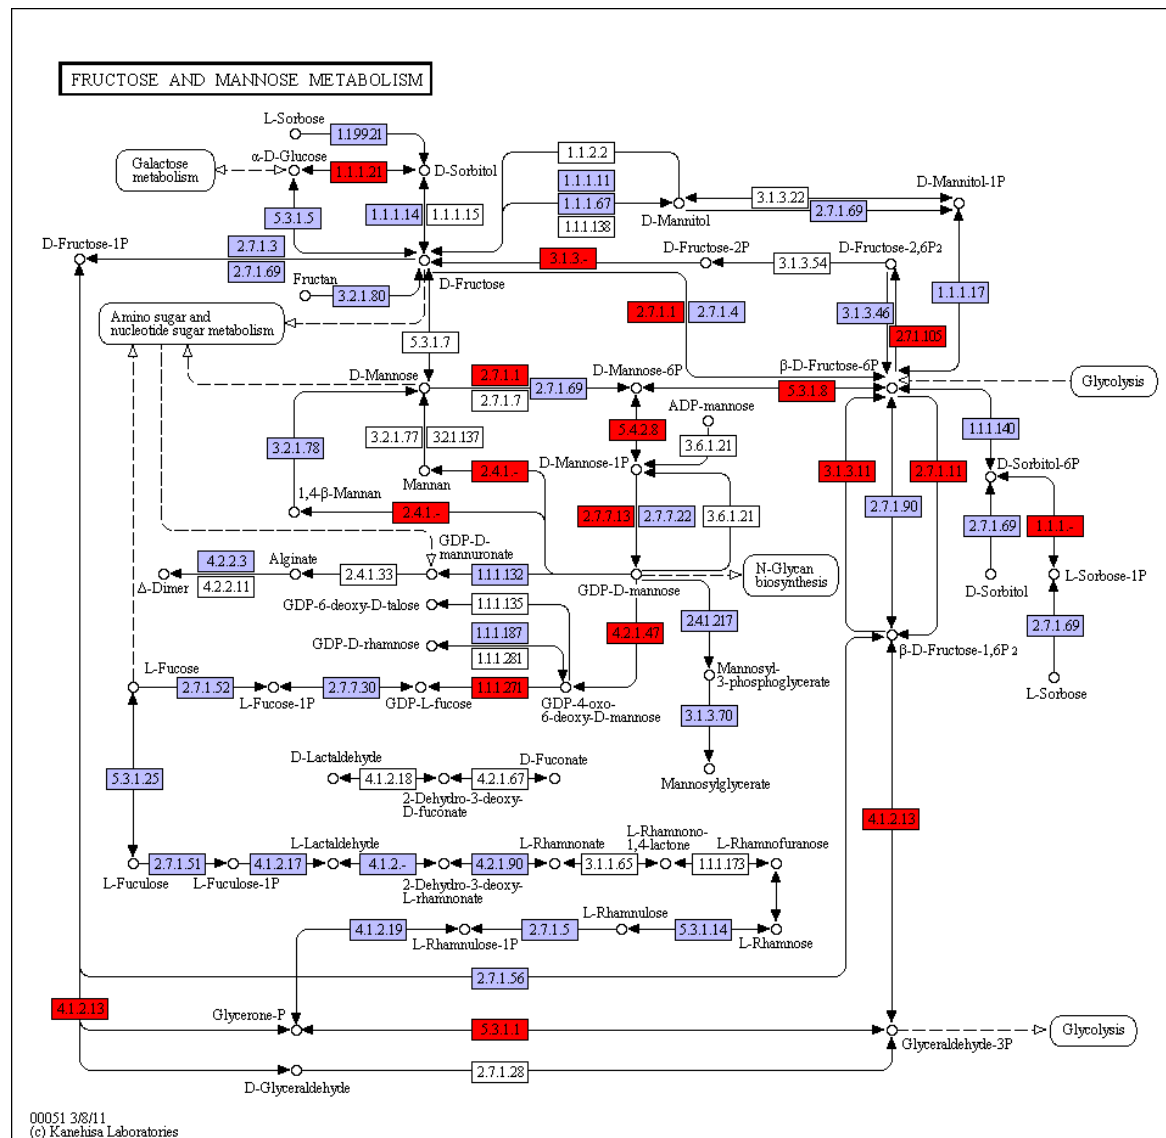

Figure 103: ko00051 Fructose and mannose metabolism



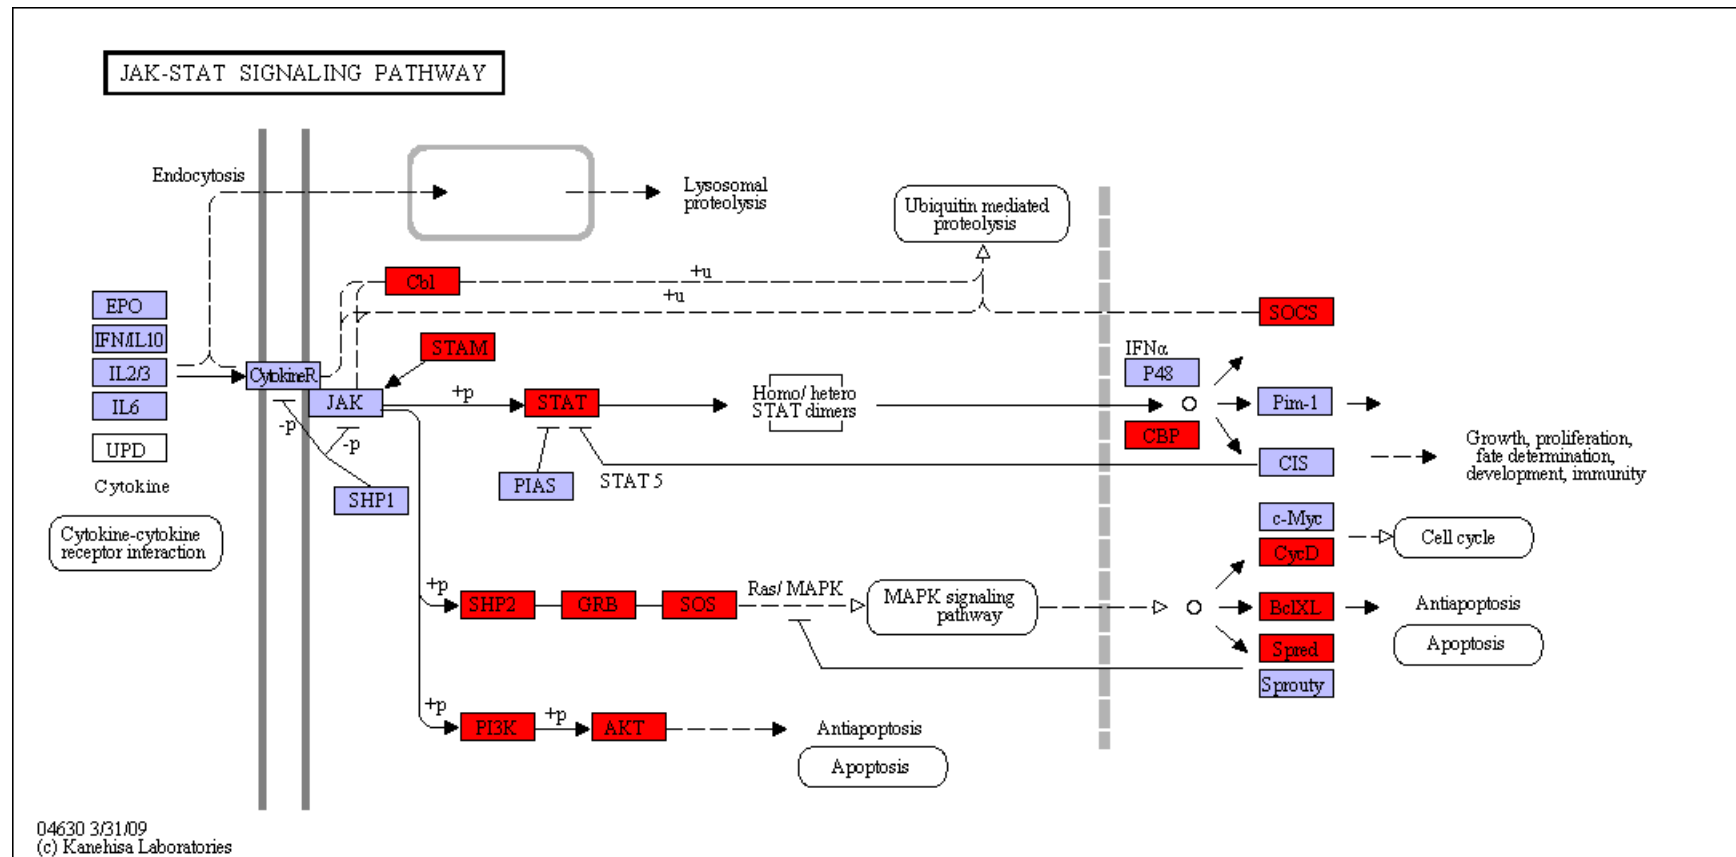

Figure 104: ko04630 Jak-STAT signaling pathway

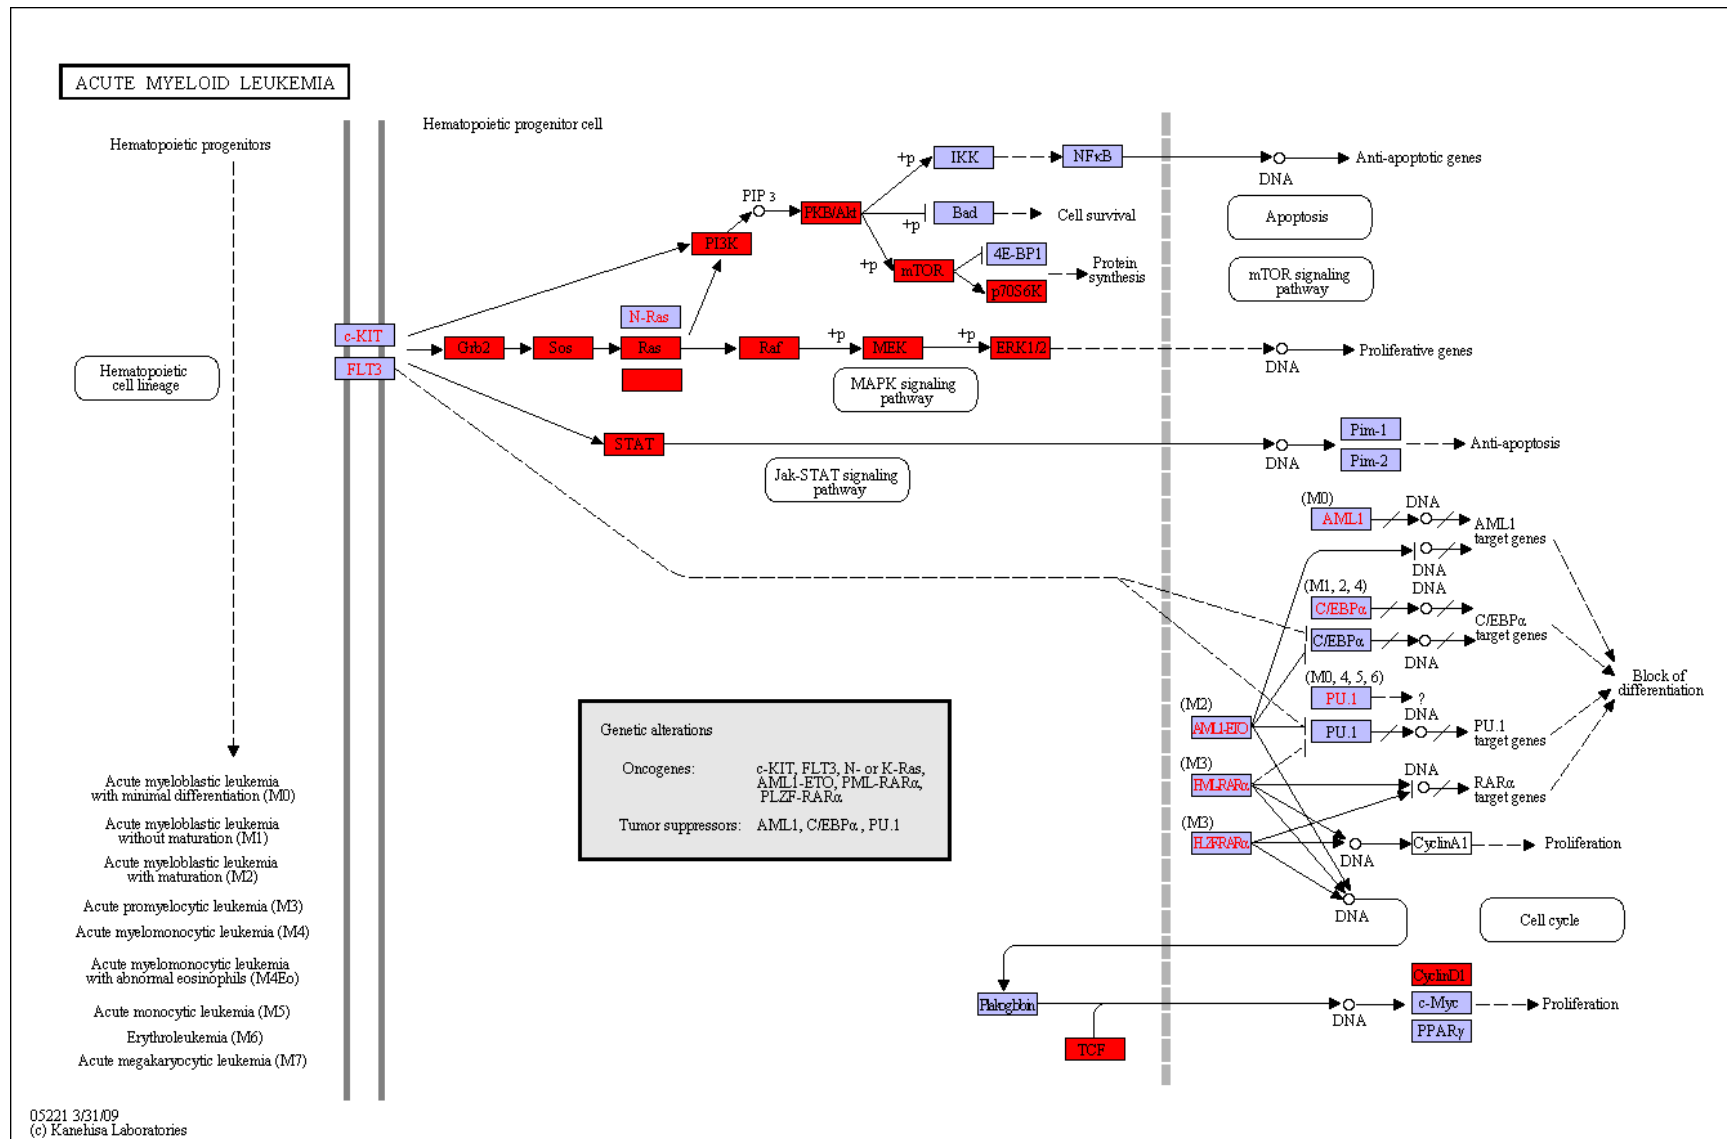

Figure 105: ko05221 Acute myeloid leukemia

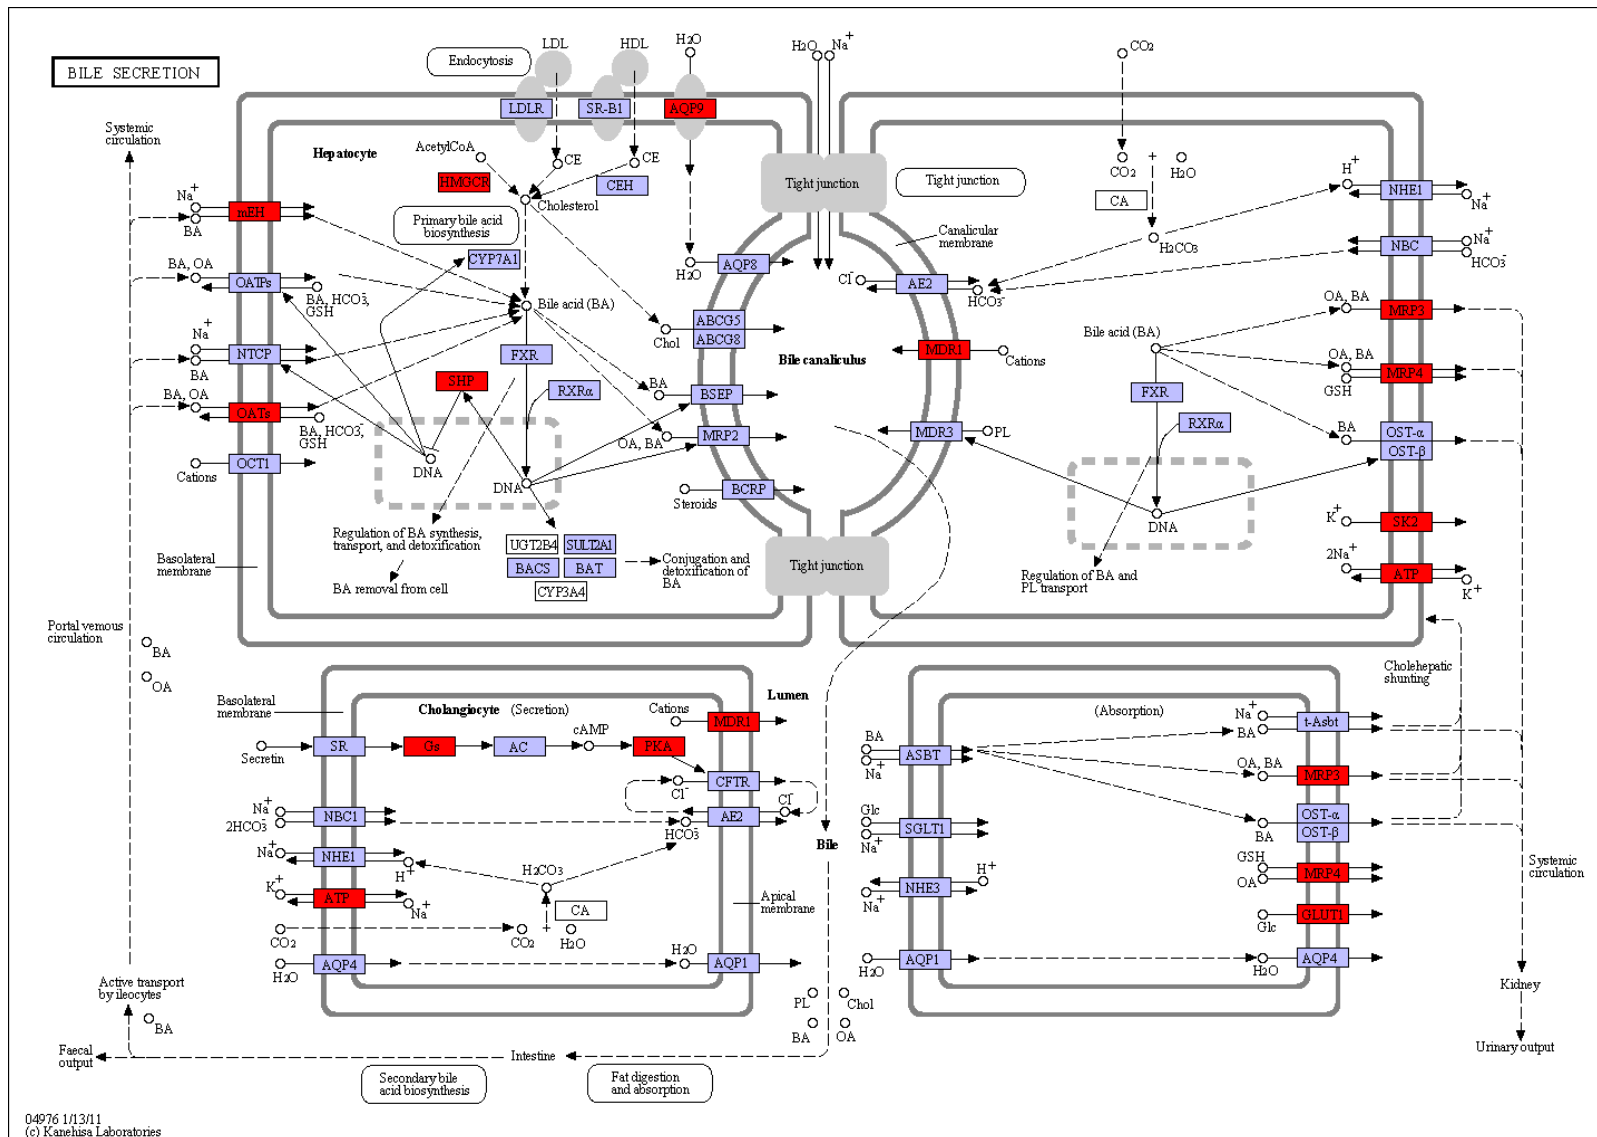

Figure 106: ko04976 Bile secretion

**PROTEIN EXPORT**

**Sec dependent pathway**

Prokaryotic type

Translocation channel and related proteins

SecY SecE SecG

SecD/F YajC

YidC

SecA SecB SecM

SRP

Ffh Ffs

SRP receptor

FtsY

Eukaryotic type

SEC61 $\alpha$  SEC61 $\beta$  SEC61 $\gamma$

SEC62 SEC63

BiP

SRP9 SRP72 SRP19 RN7SL

SRP14 SRP68 SRP54

SRPR

SRPRB

**Tat (twin-arginine translocation) system**

Prokaryotic type

TatA TatB TatC

TatE

**Signal peptidase**

Prokaryotic type

SPase I SPase II

Eukaryotic type

SPCS1 SPCS2 SPCS3 SEC11

IMP1 IMP2

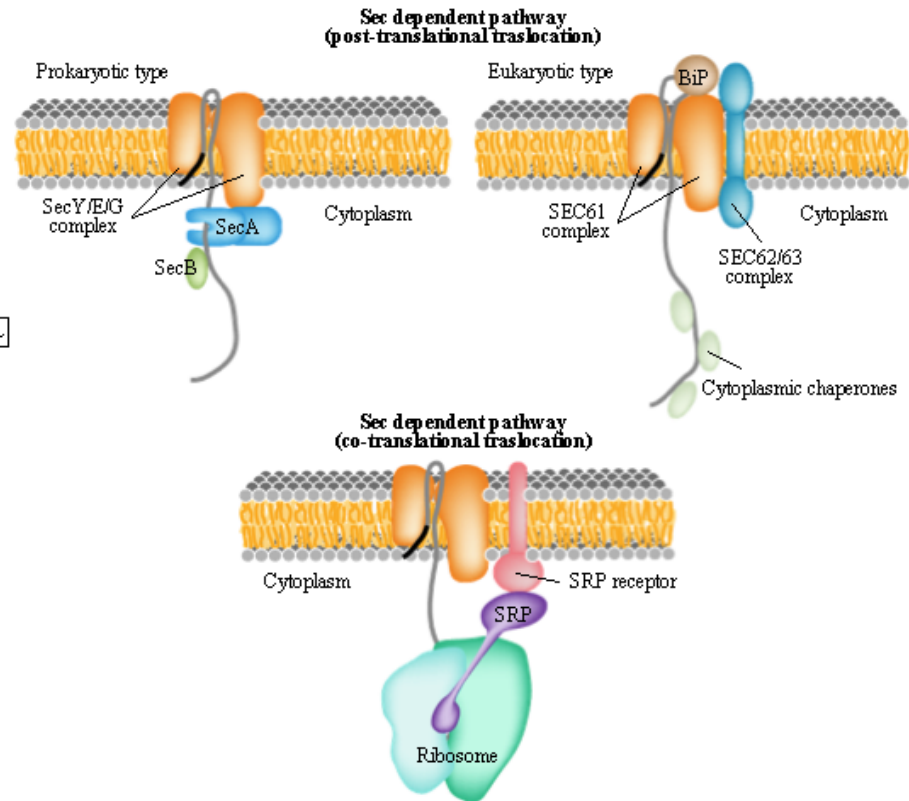

Figure 107: ko03060 Protein export

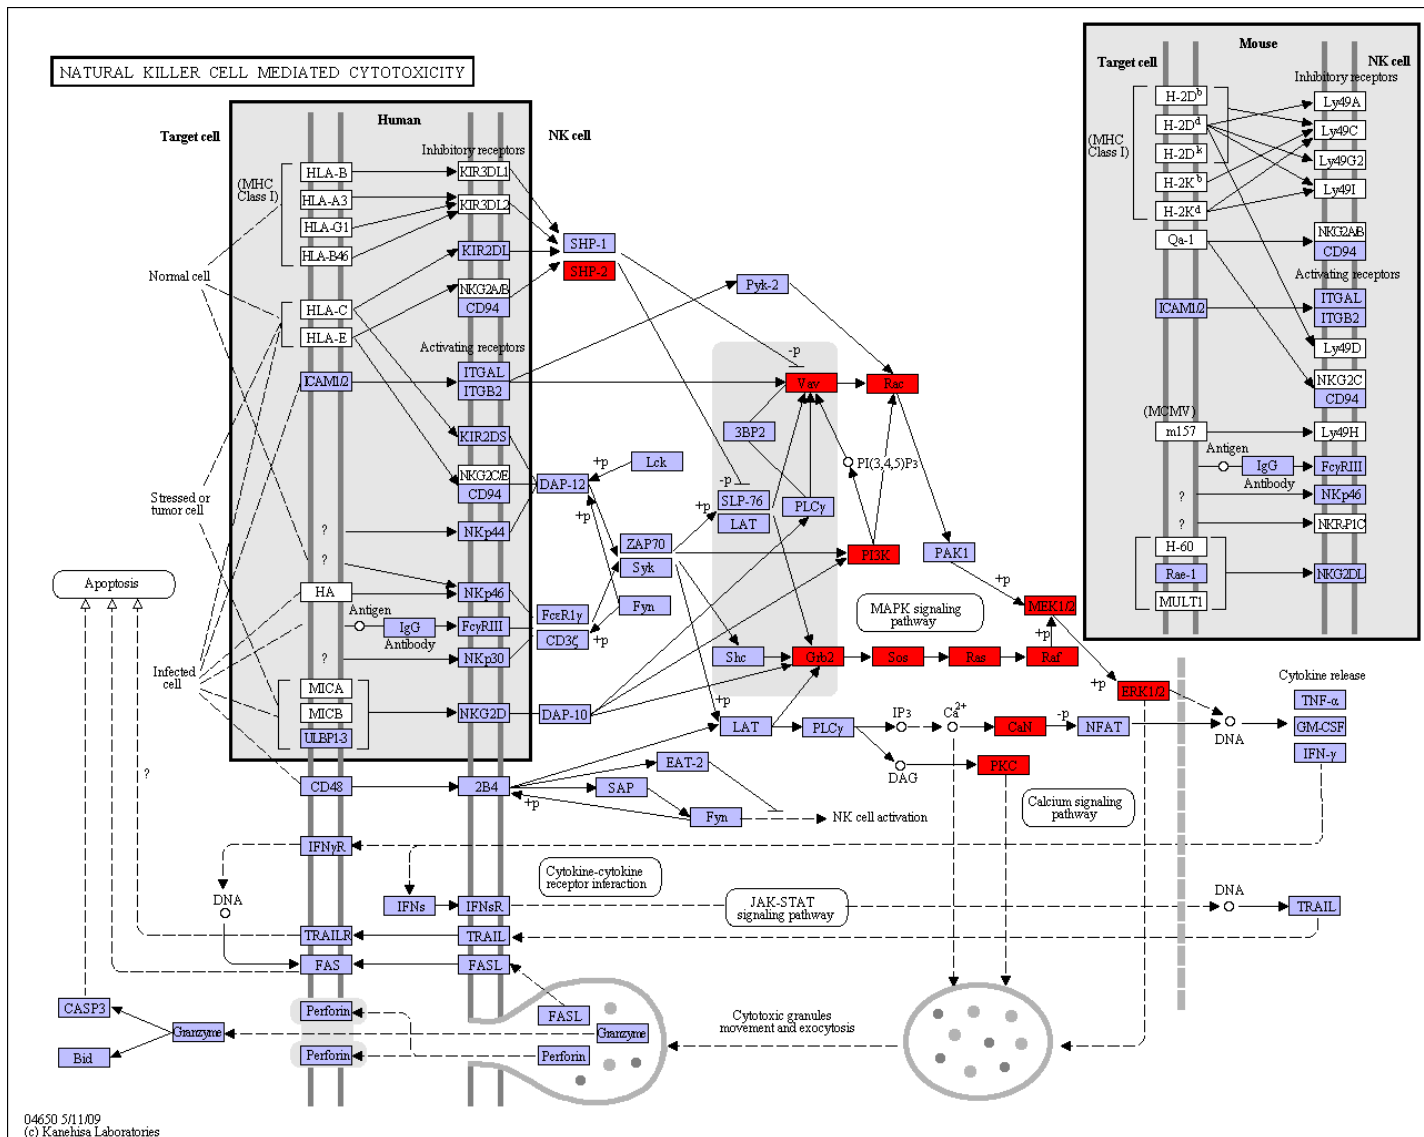

Figure 108: ko04650 Natural killer cell mediated cytotoxicity

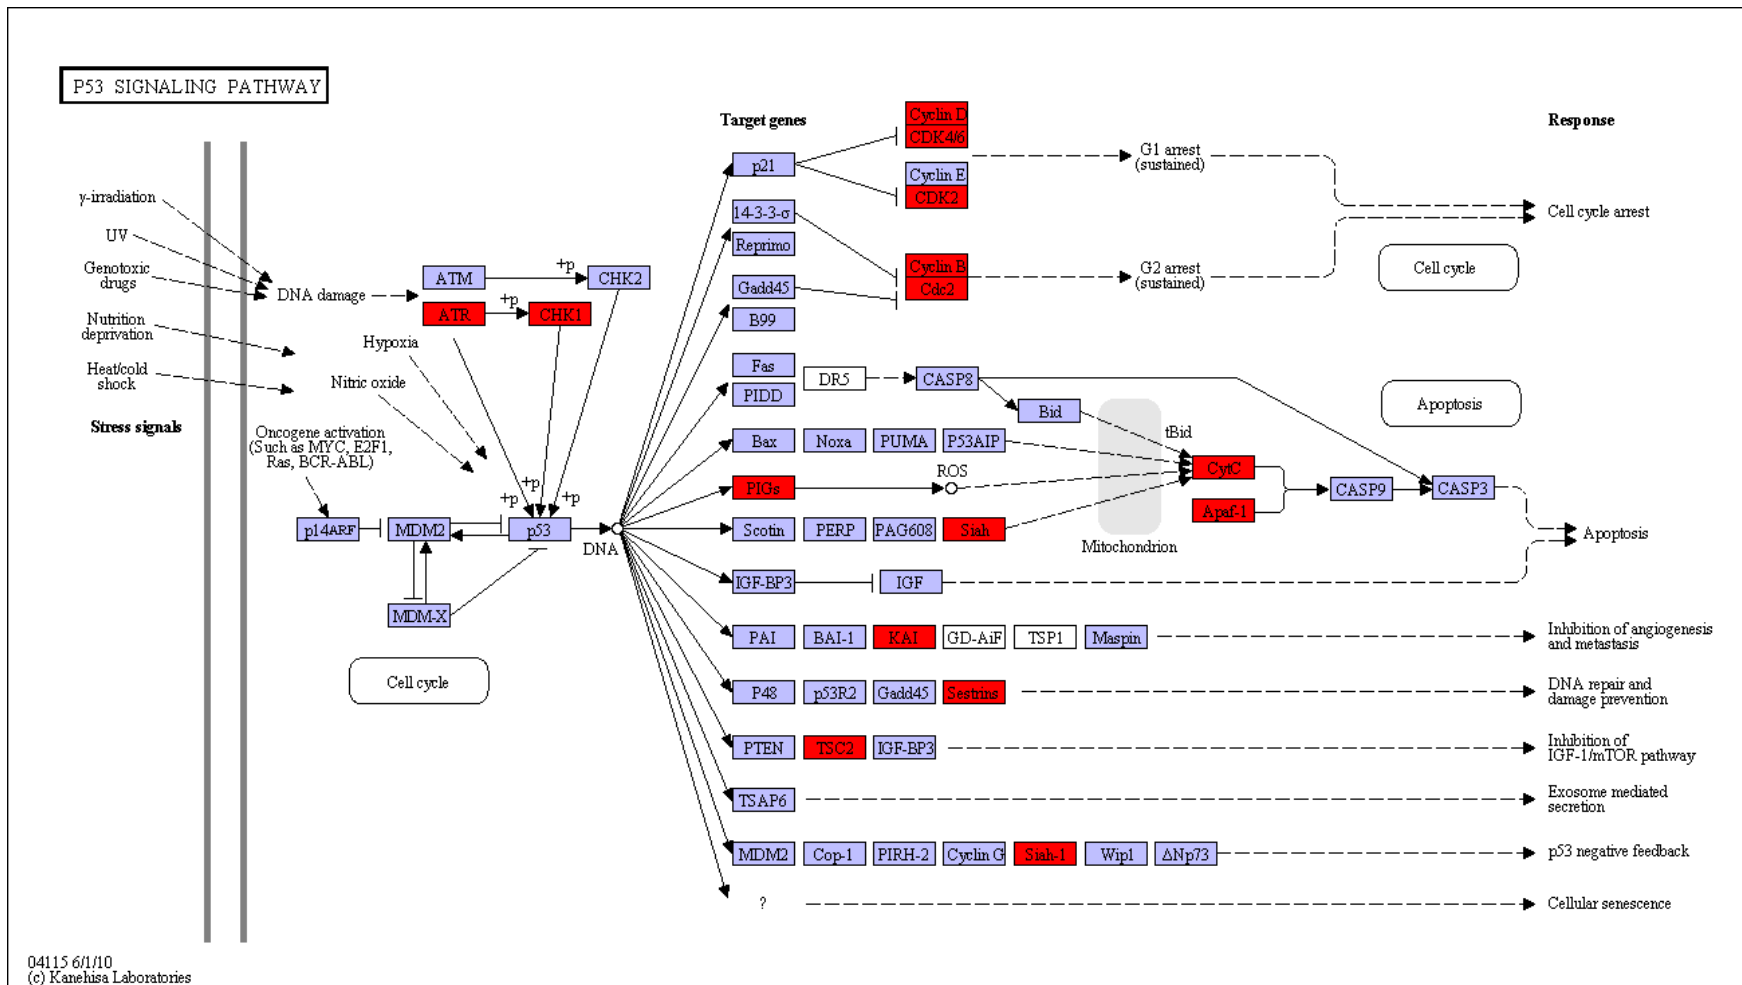

Figure 109: ko04115 p53 signaling pathway



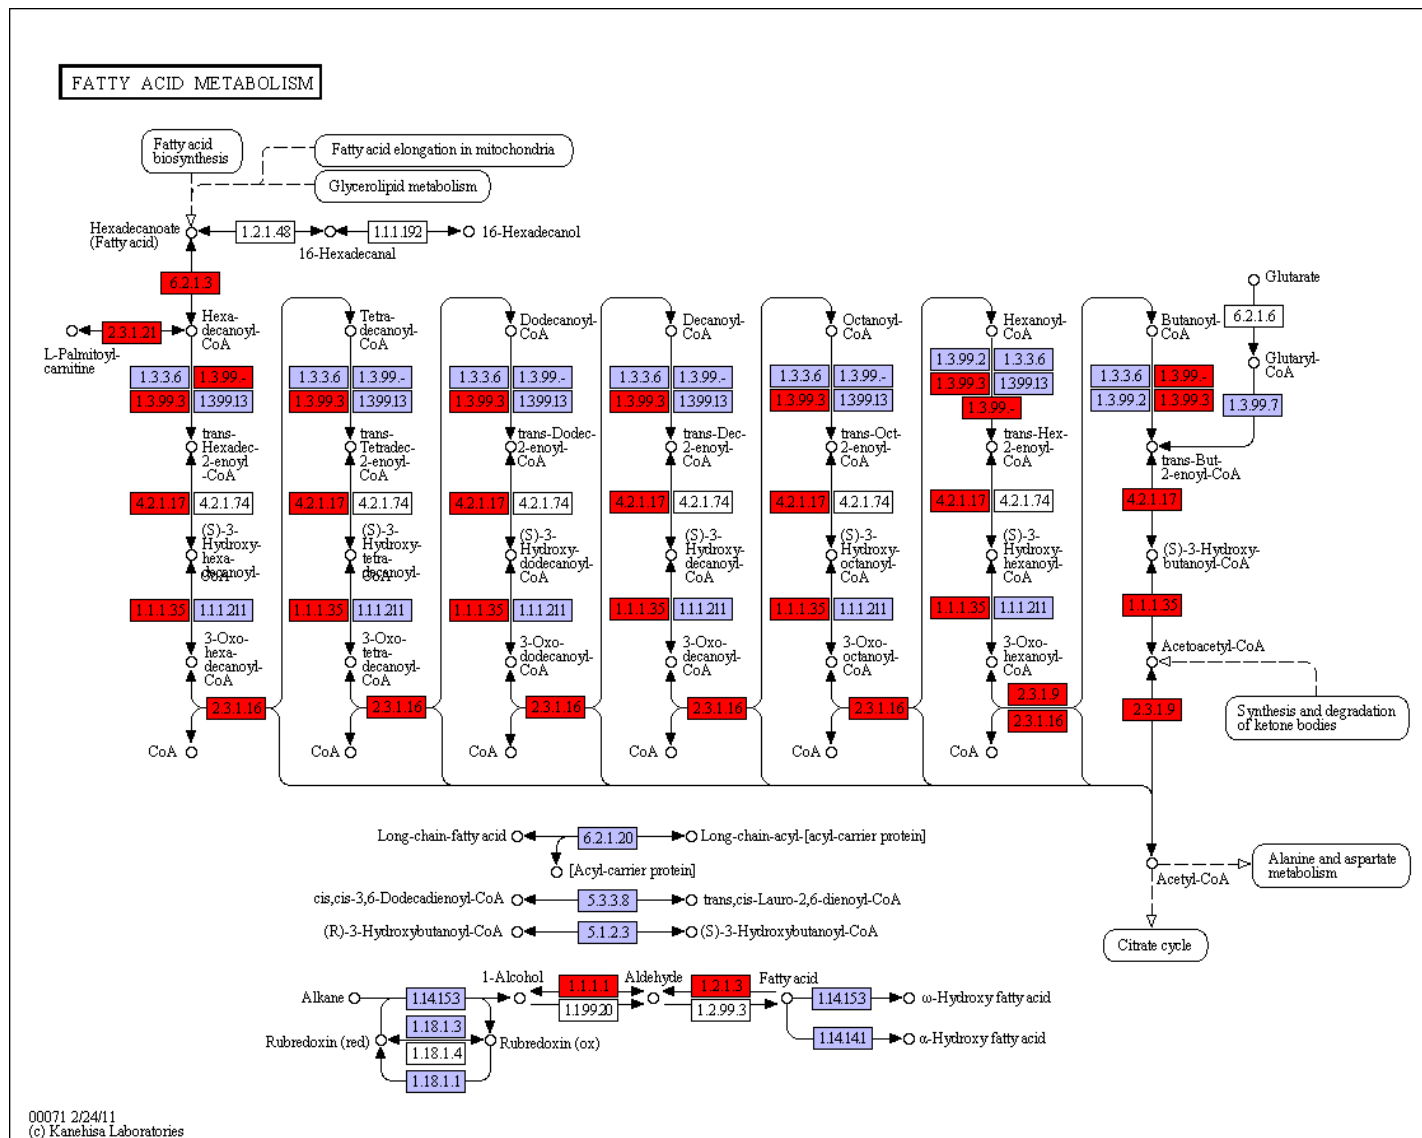

Figure 111: ko00071 Fatty acid metabolism





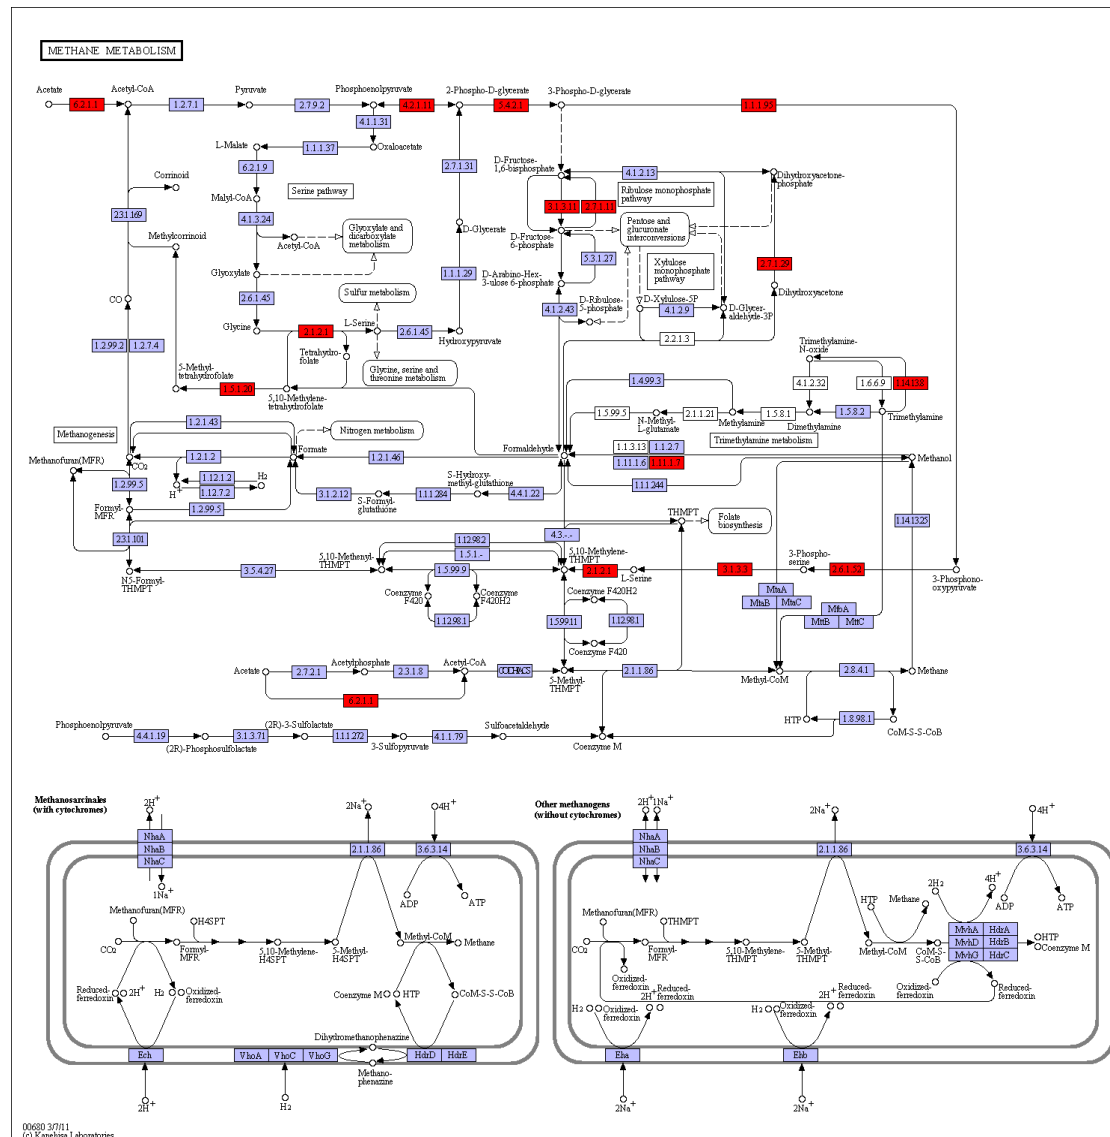

Figure 113: ko00680 Methane metabolism

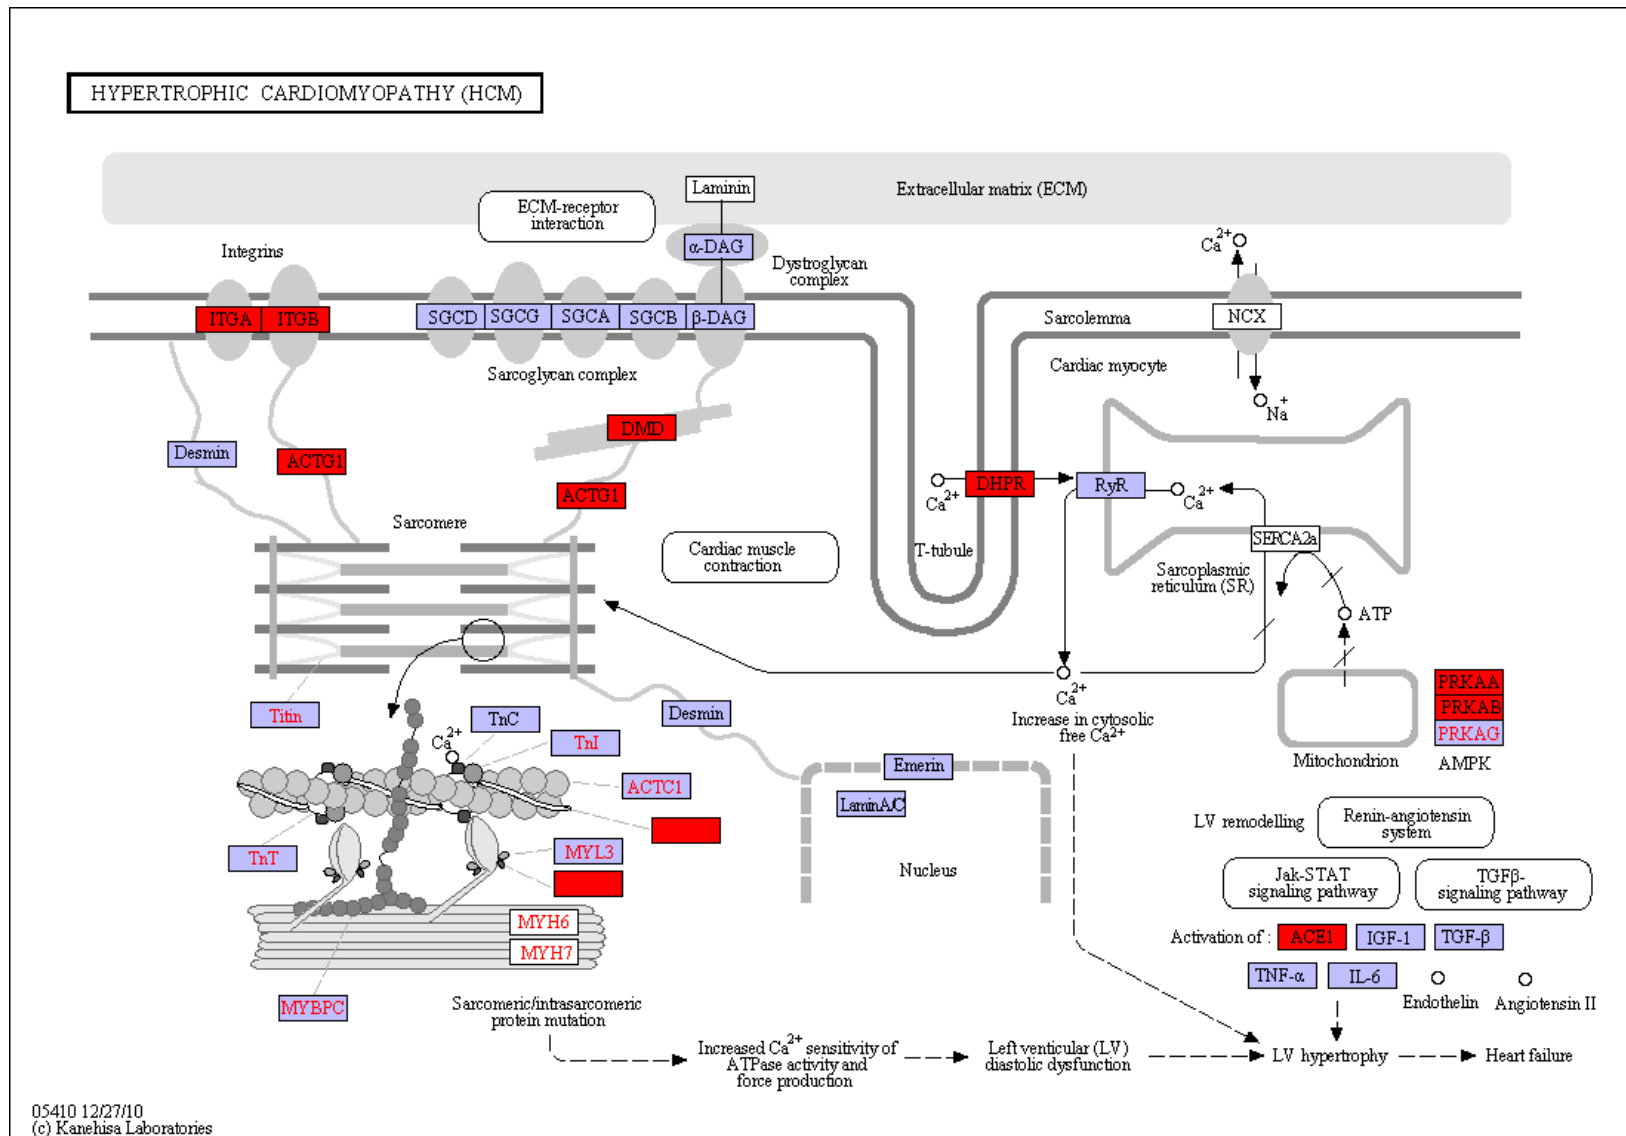

Figure 114: ko05410 Hypertrophic cardiomyopathy (HCM)

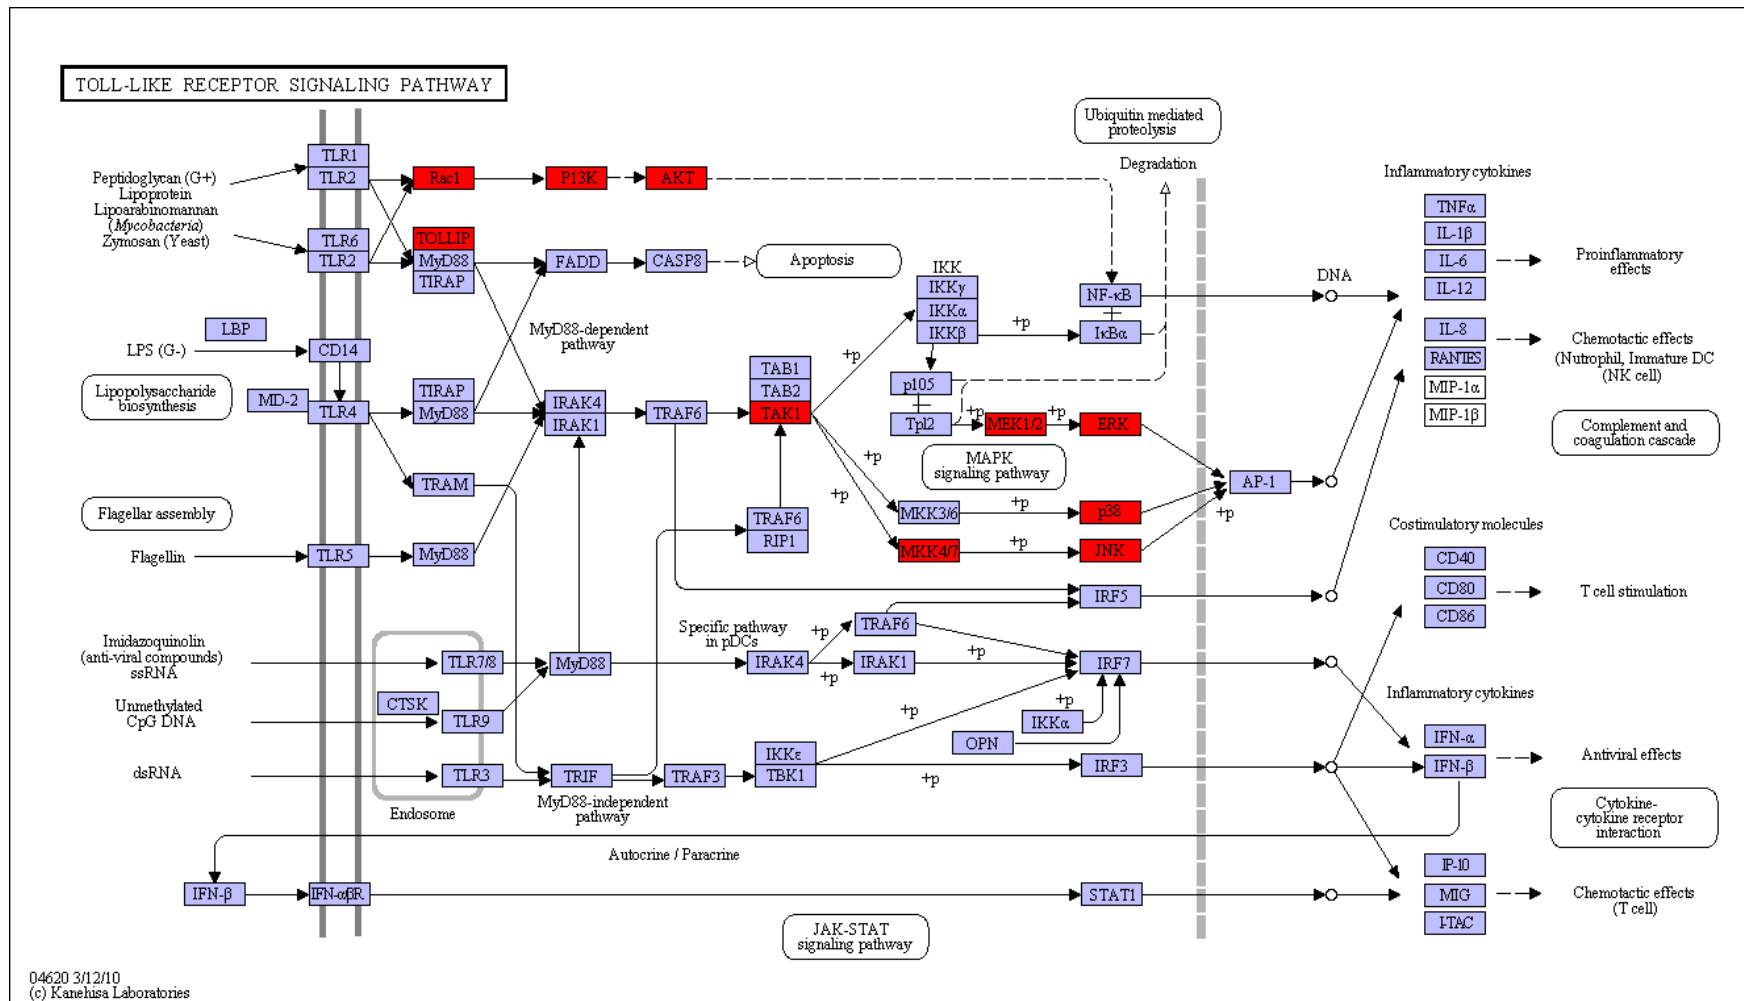

Figure 115: ko04620 Toll-like receptor signaling pathway

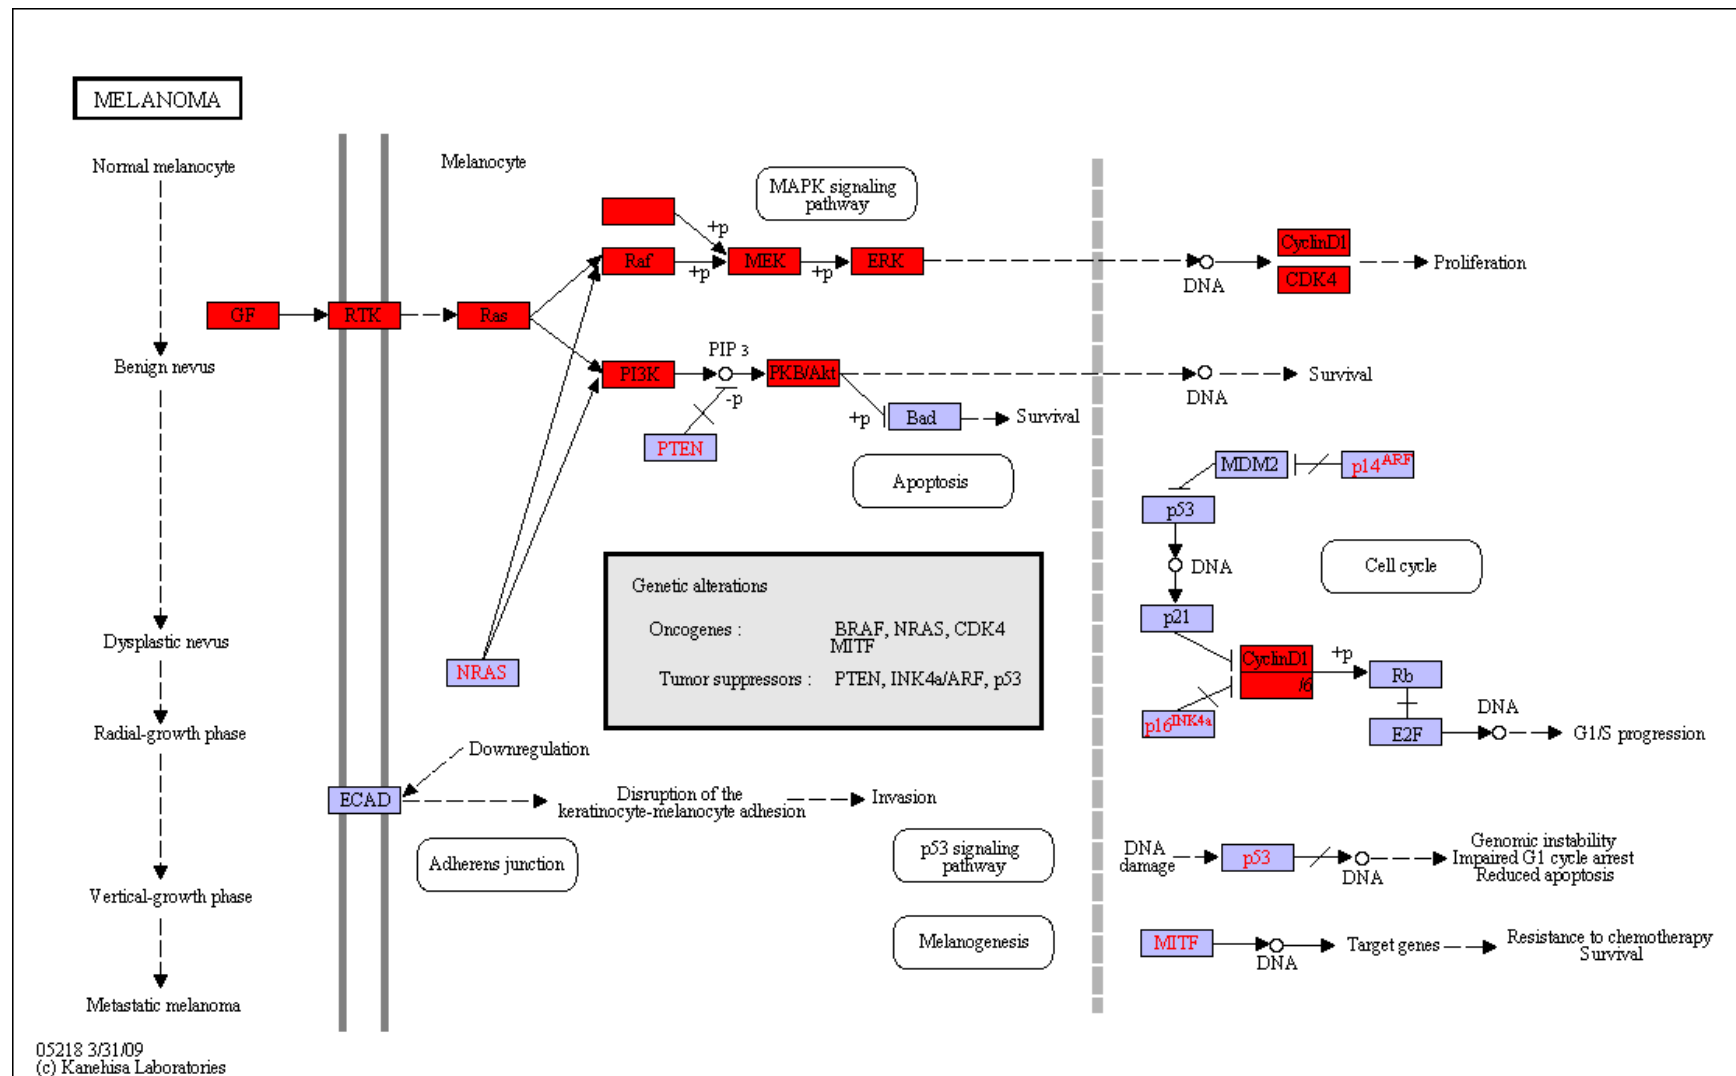

Figure 116: ko05218 Melanoma

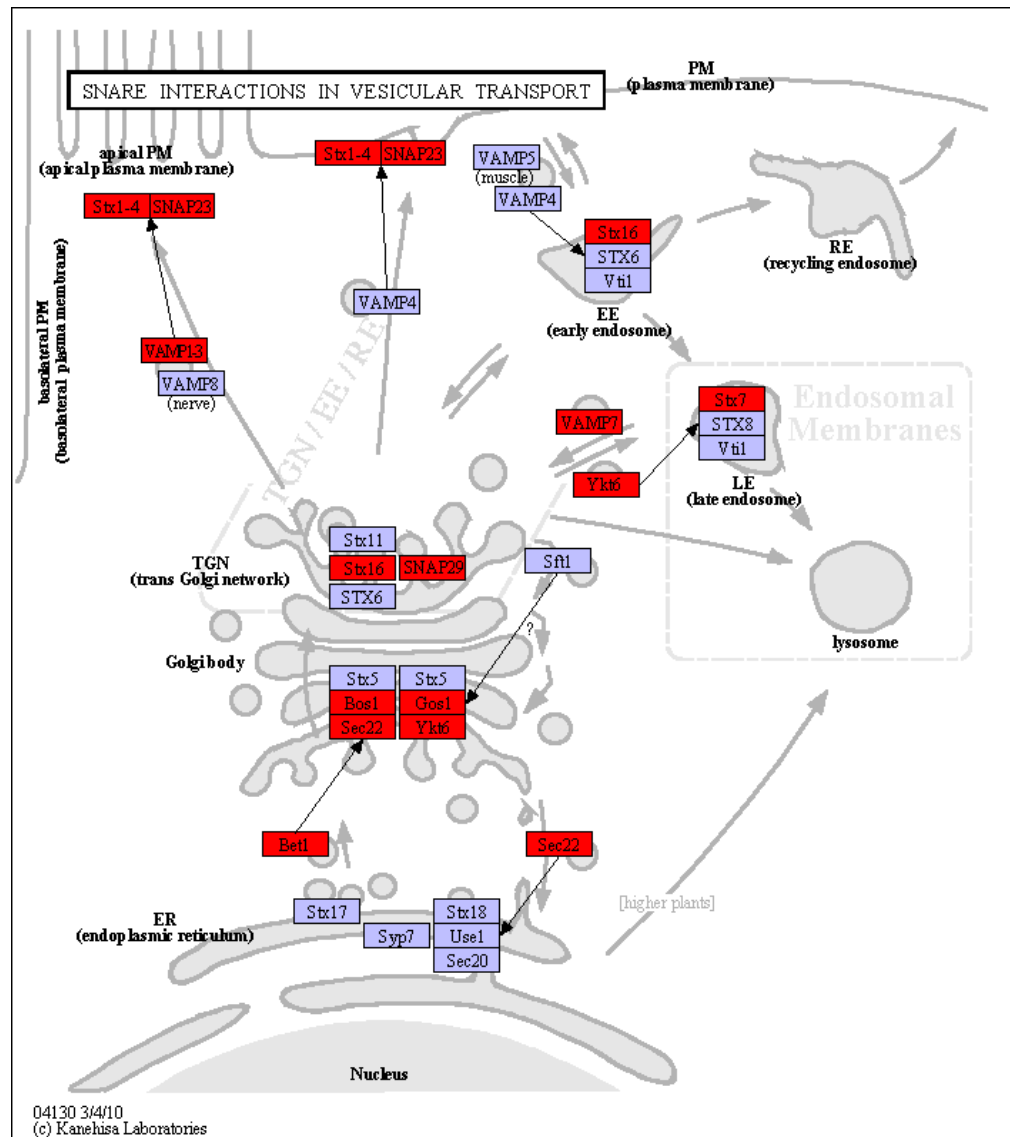

Figure 117: ko04130 SNARE interactions in vesicular transport

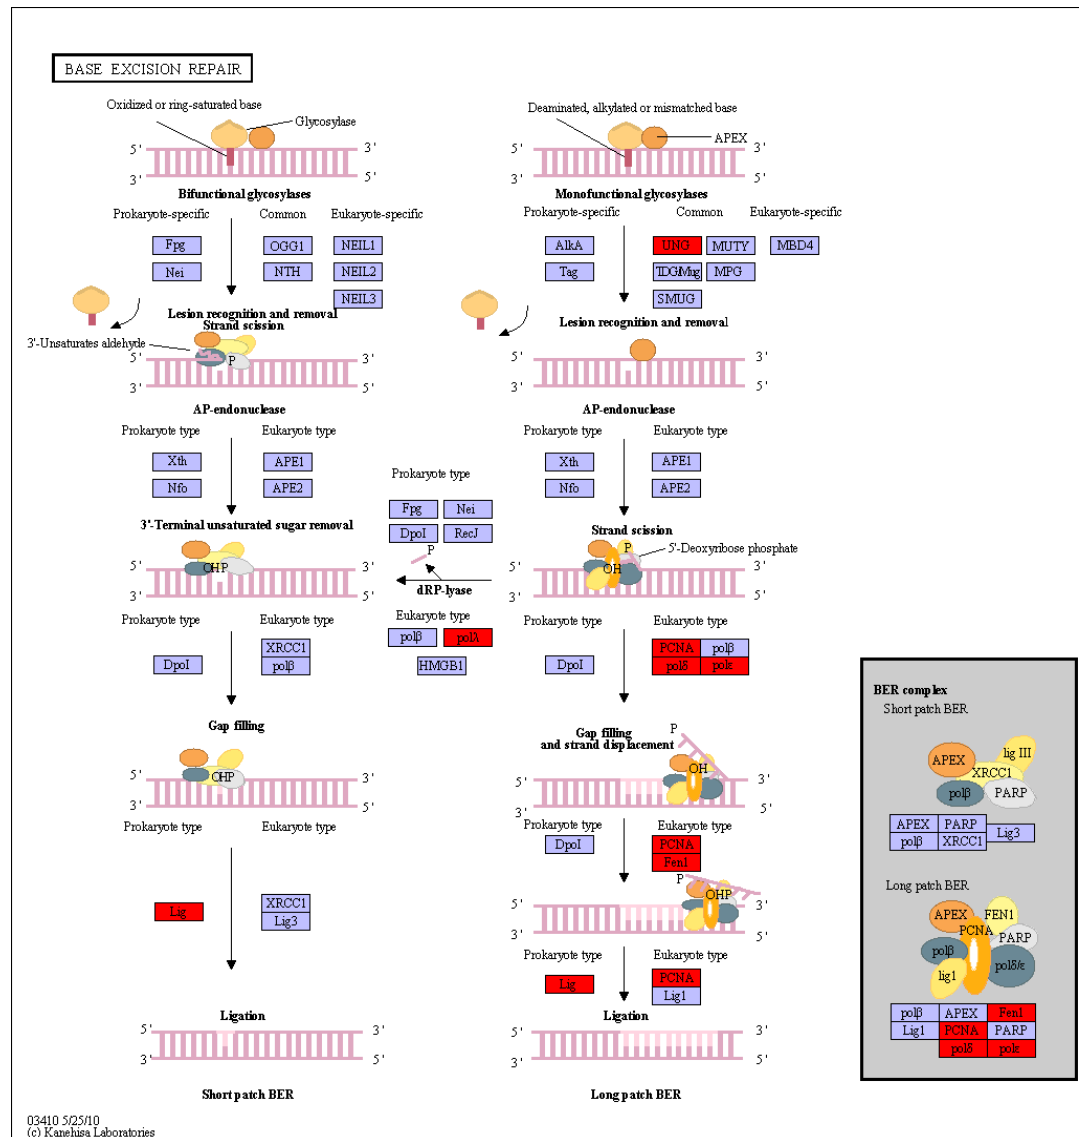

Figure 118: ko03410 Base excision repair

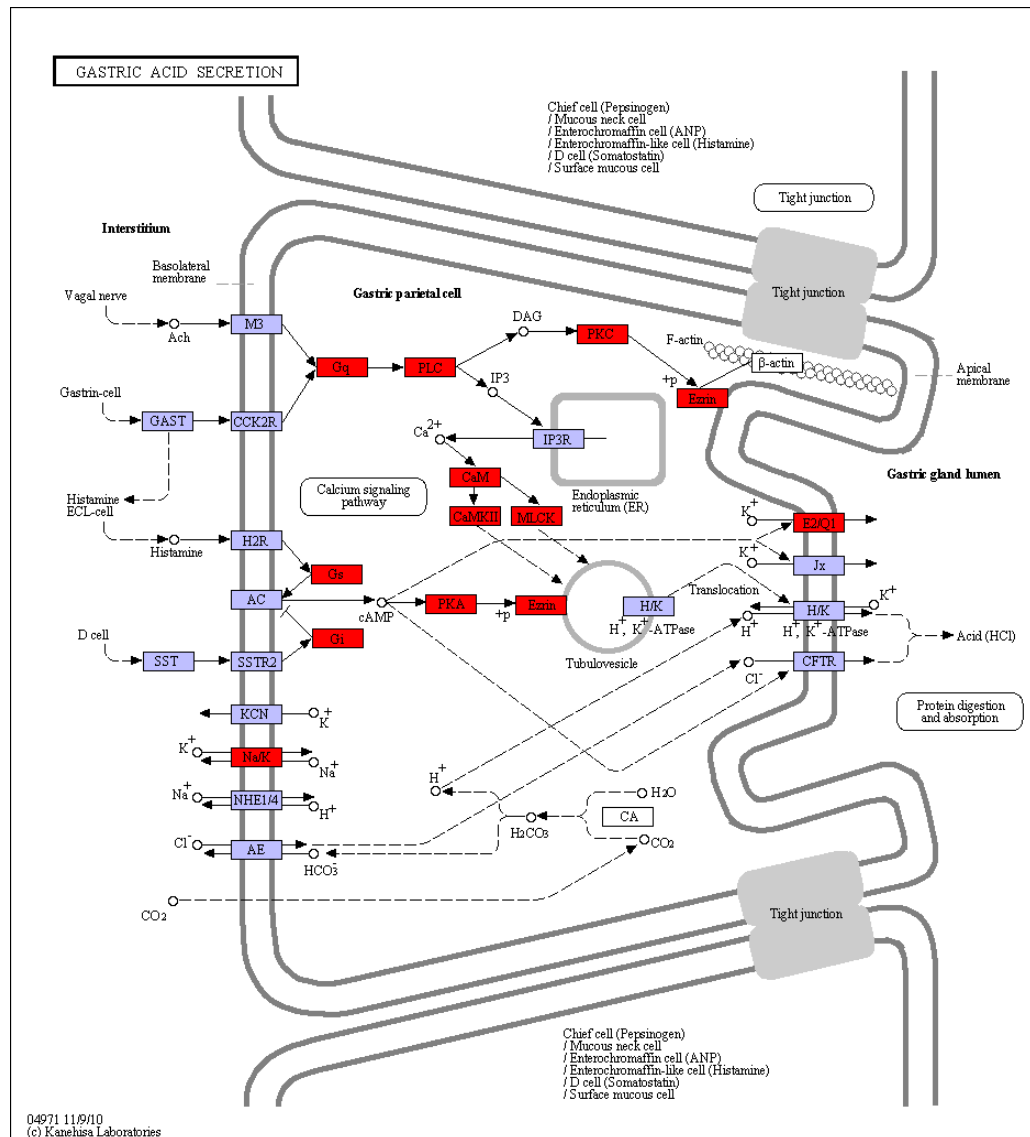

Figure 119: ko04971 Gastric acid secretion



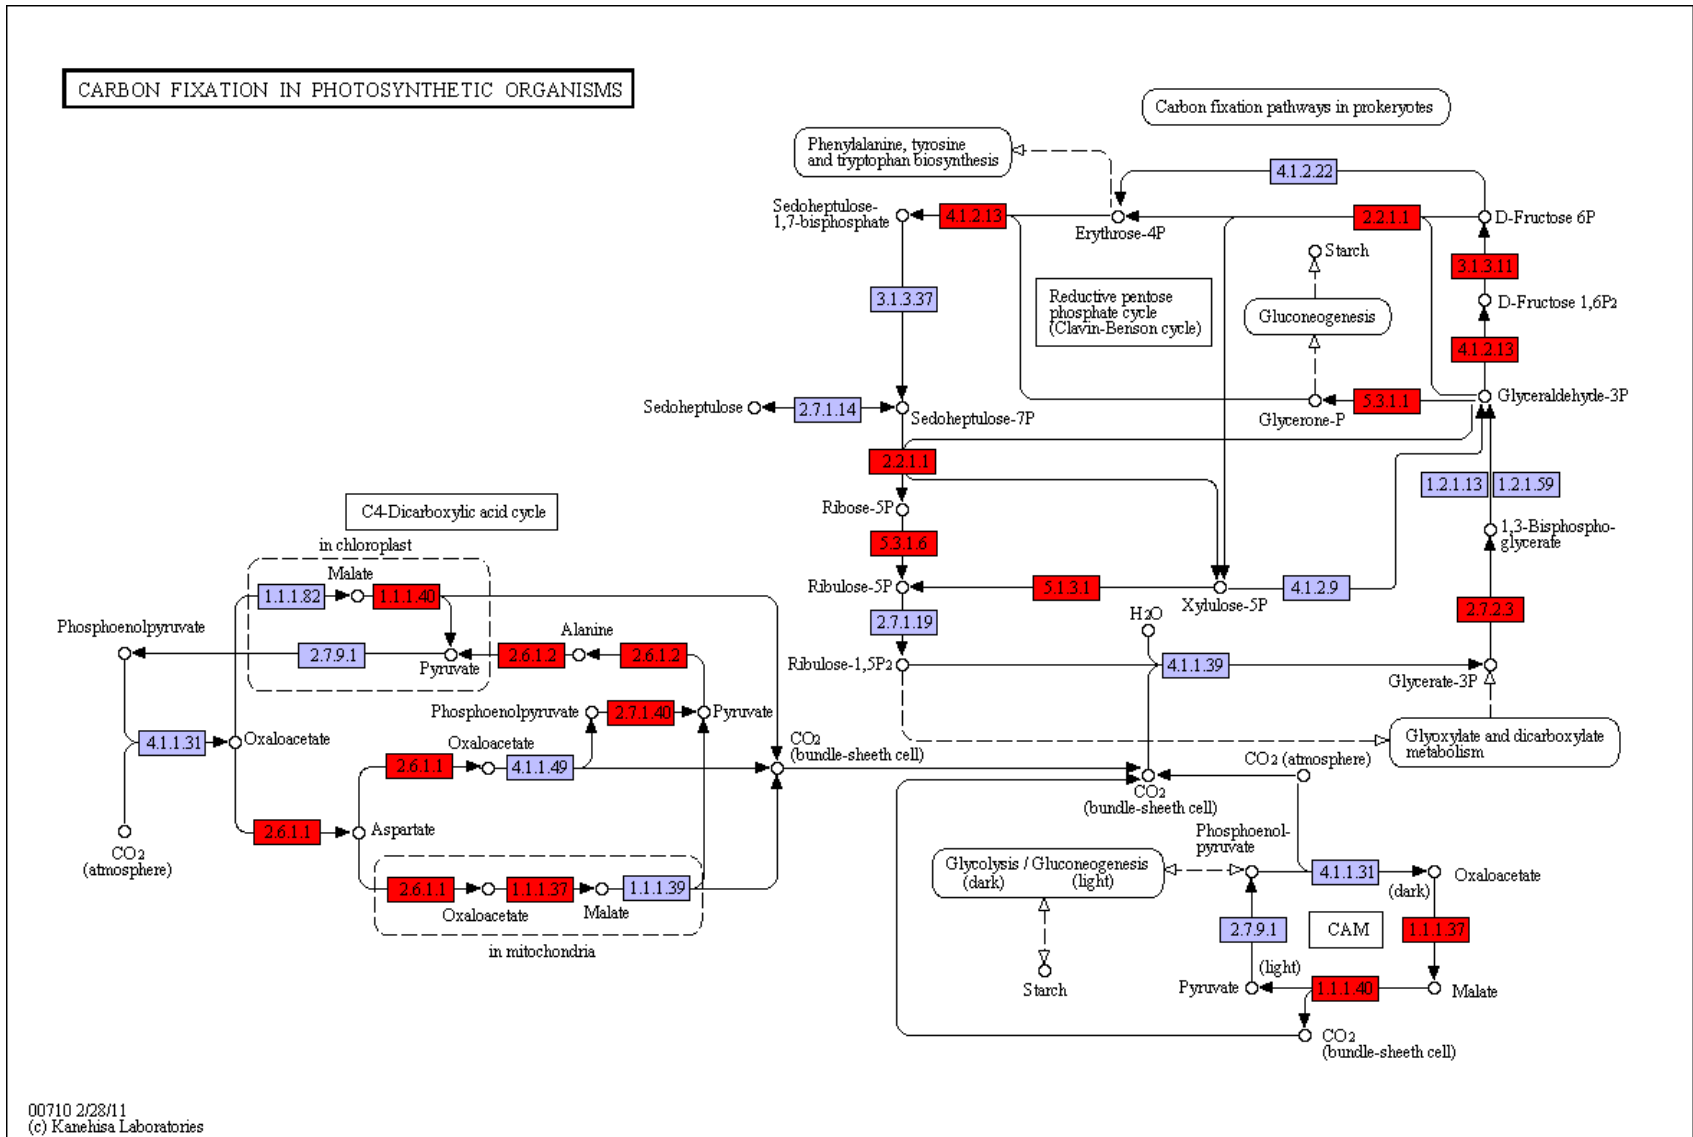

00710 2/28/11  
 (c) Kanehisa Laboratories

Figure 120: ko00710 Carbon fixation in photosynthetic organisms

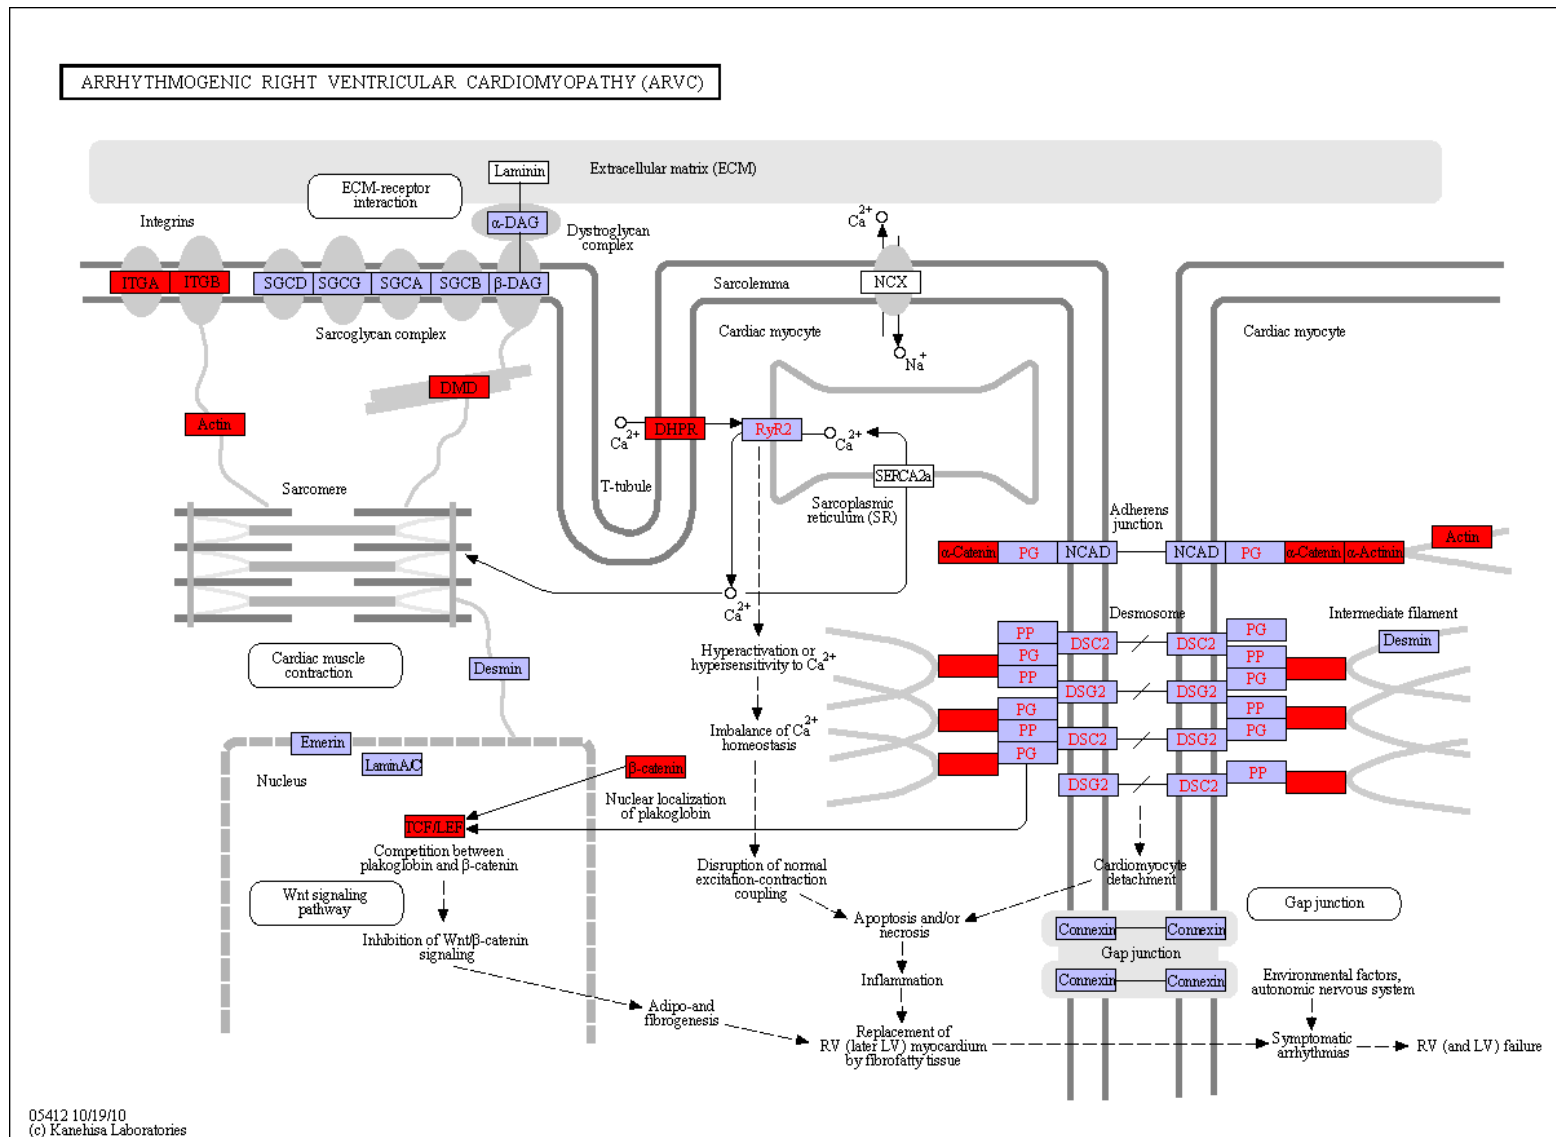

Figure 121: ko05412 Arrhythmogenic right ventricular cardiomyopathy (ARVC)



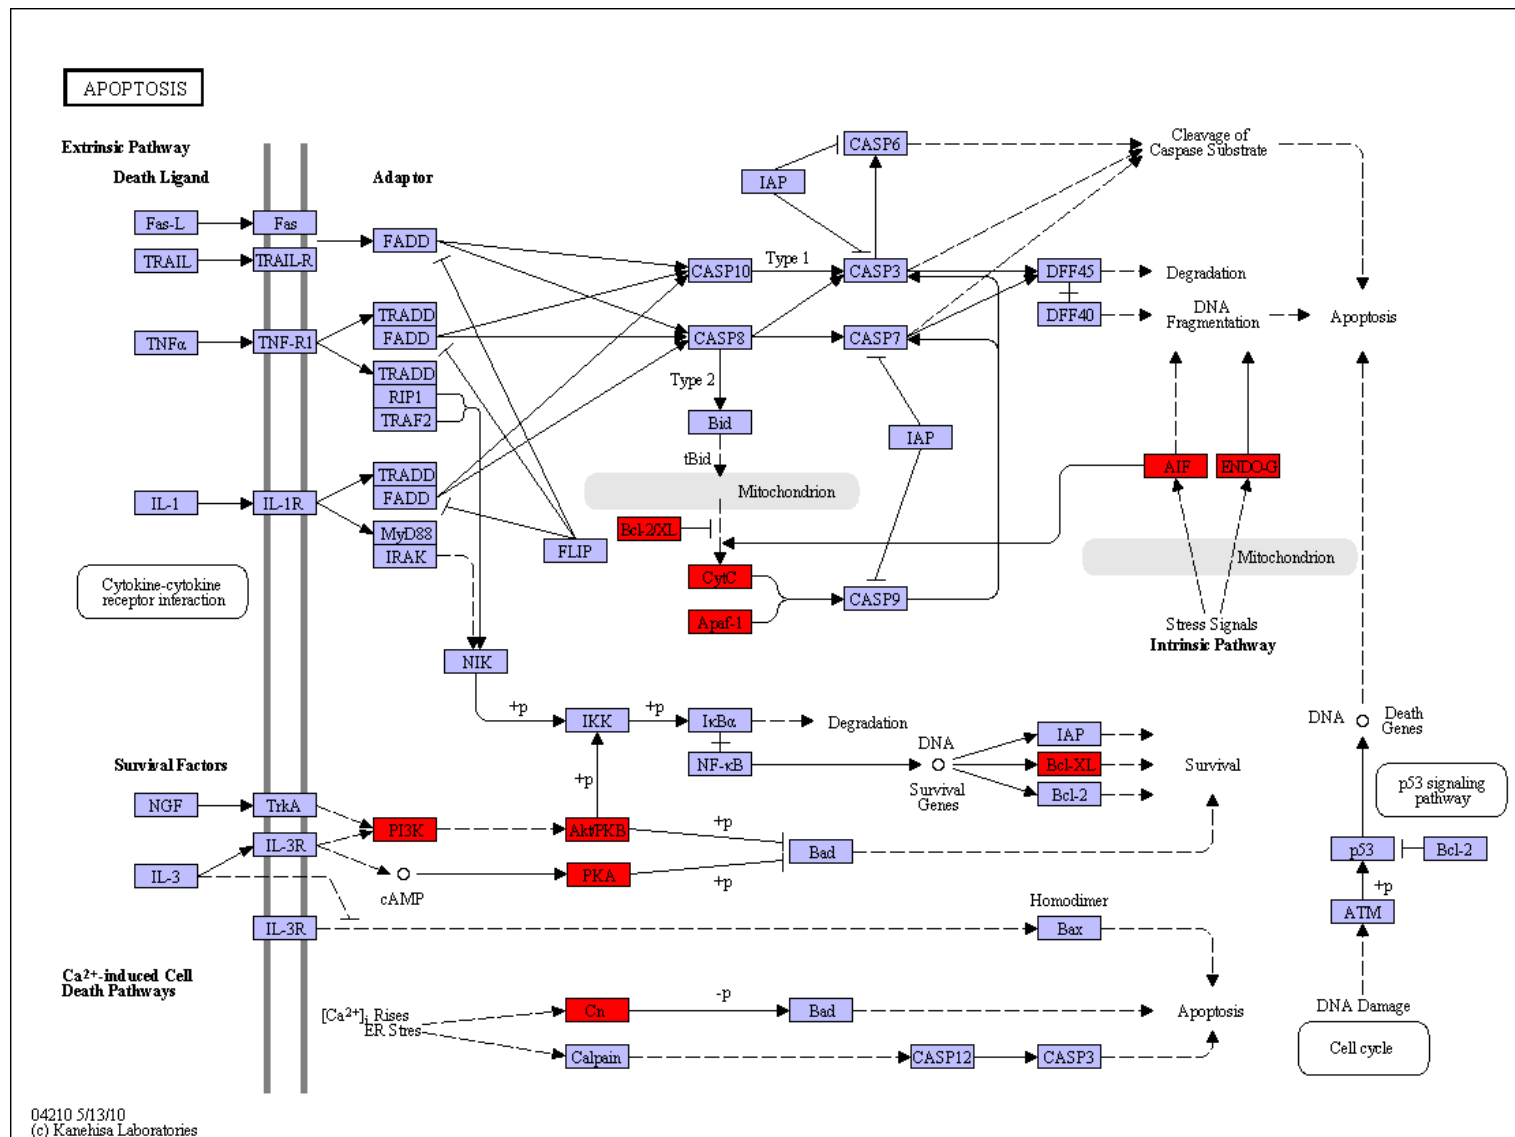

Figure 123: ko04210 Apoptosis

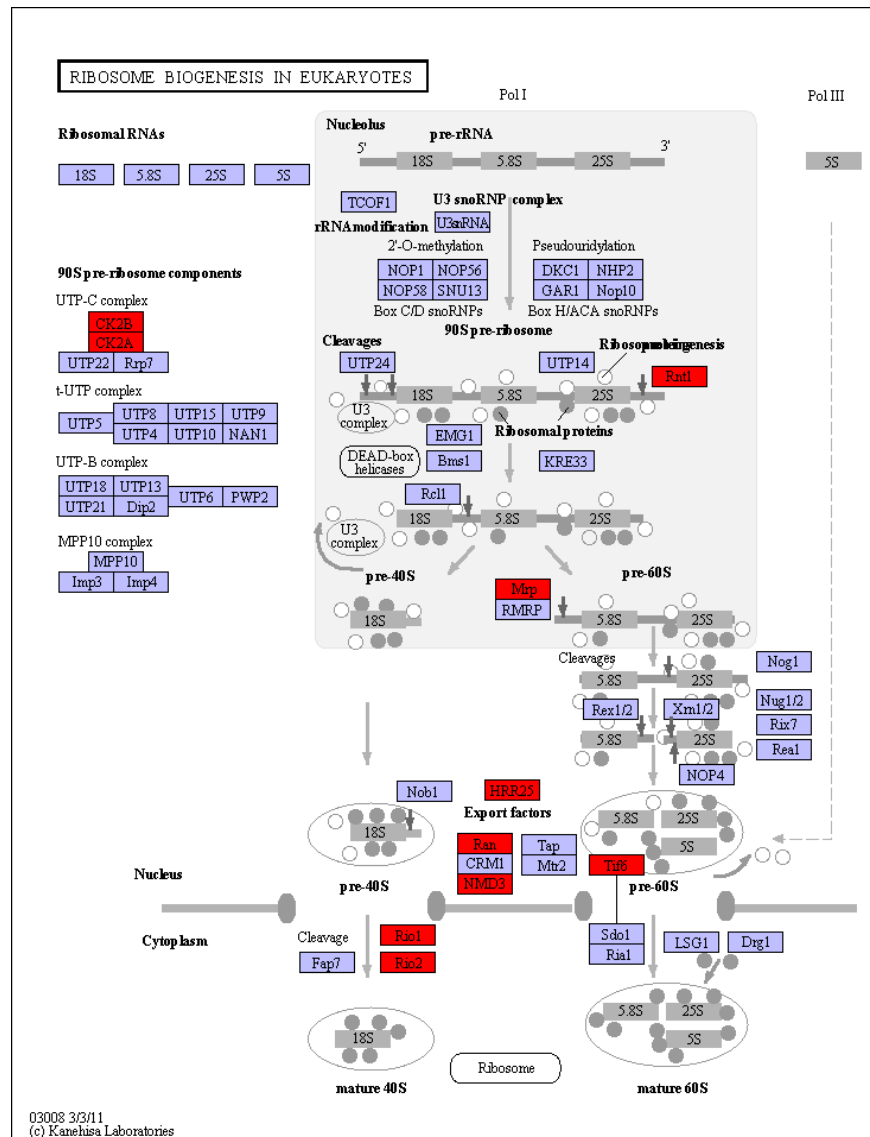

Figure 124: ko03008 Ribosome biogenesis in eukaryotes





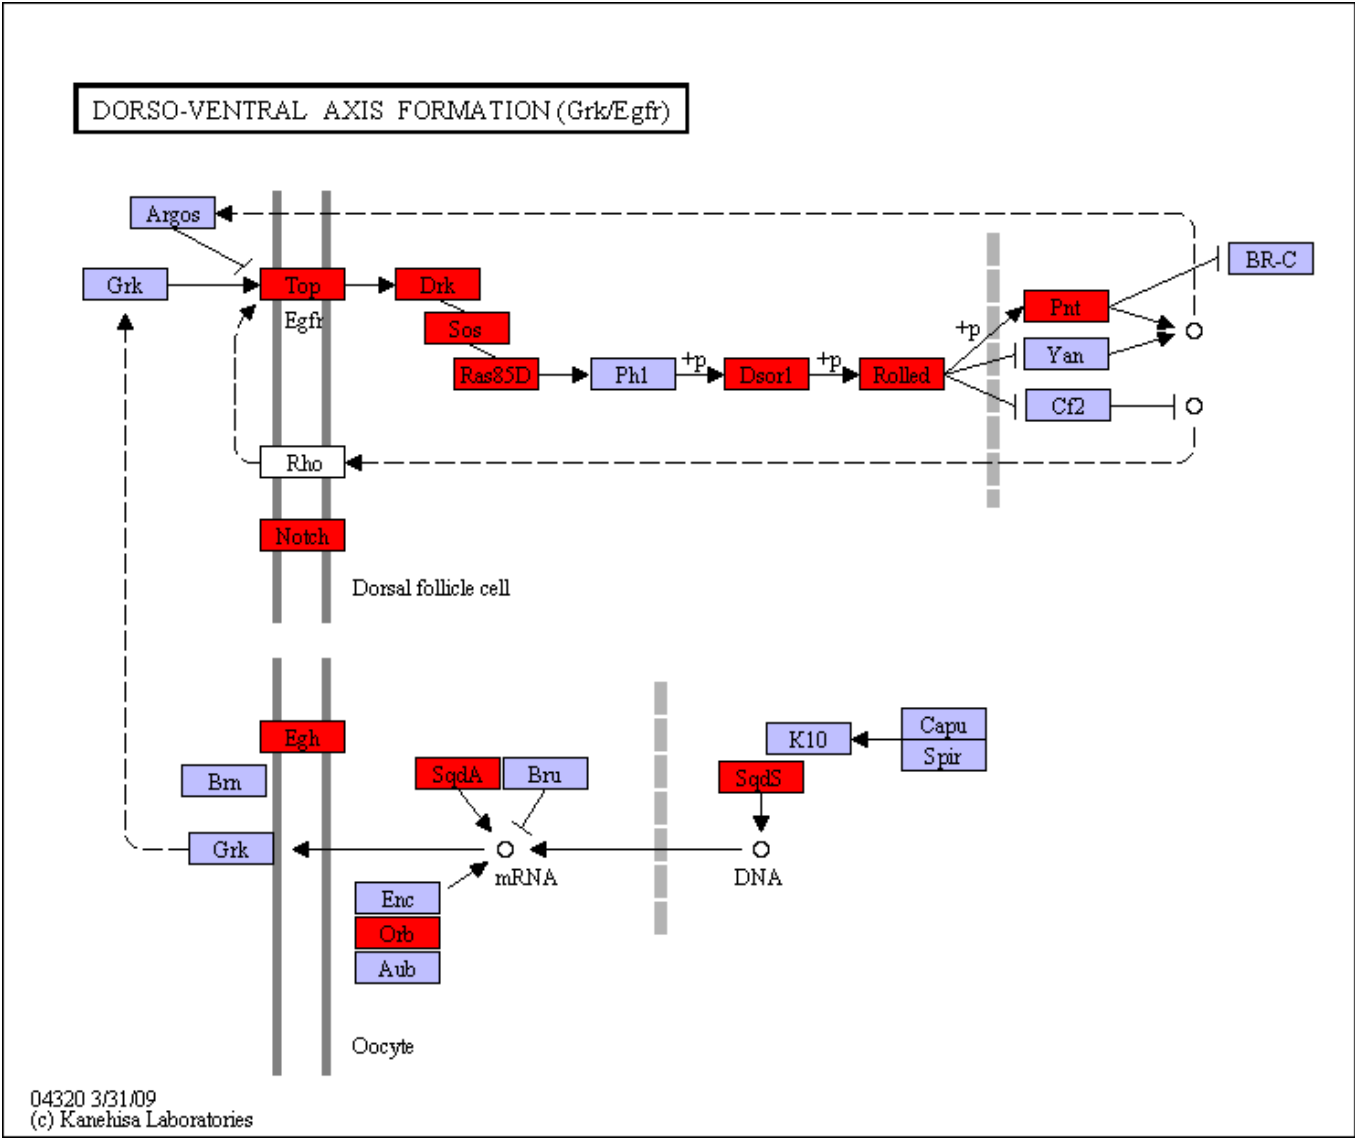

Figure 127: ko04320 Dorso-ventral axis formation



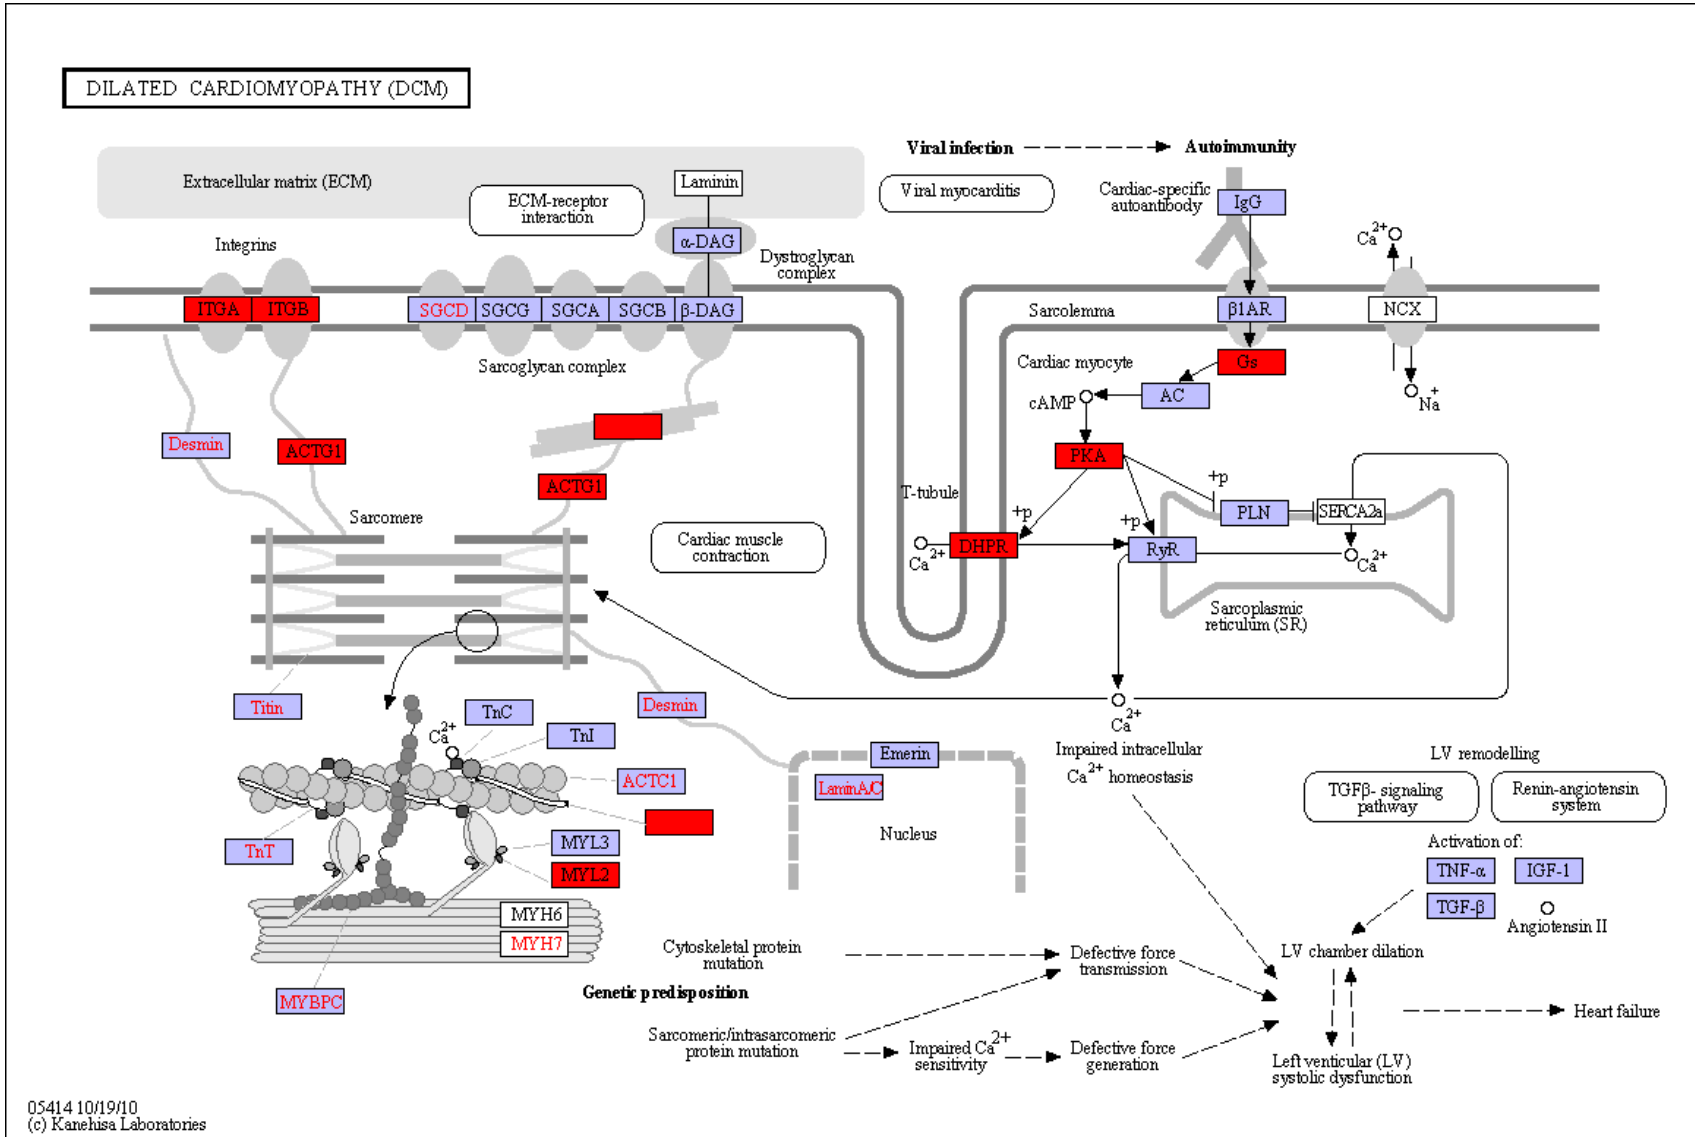

Figure 128: ko05414 Dilated cardiomyopathy

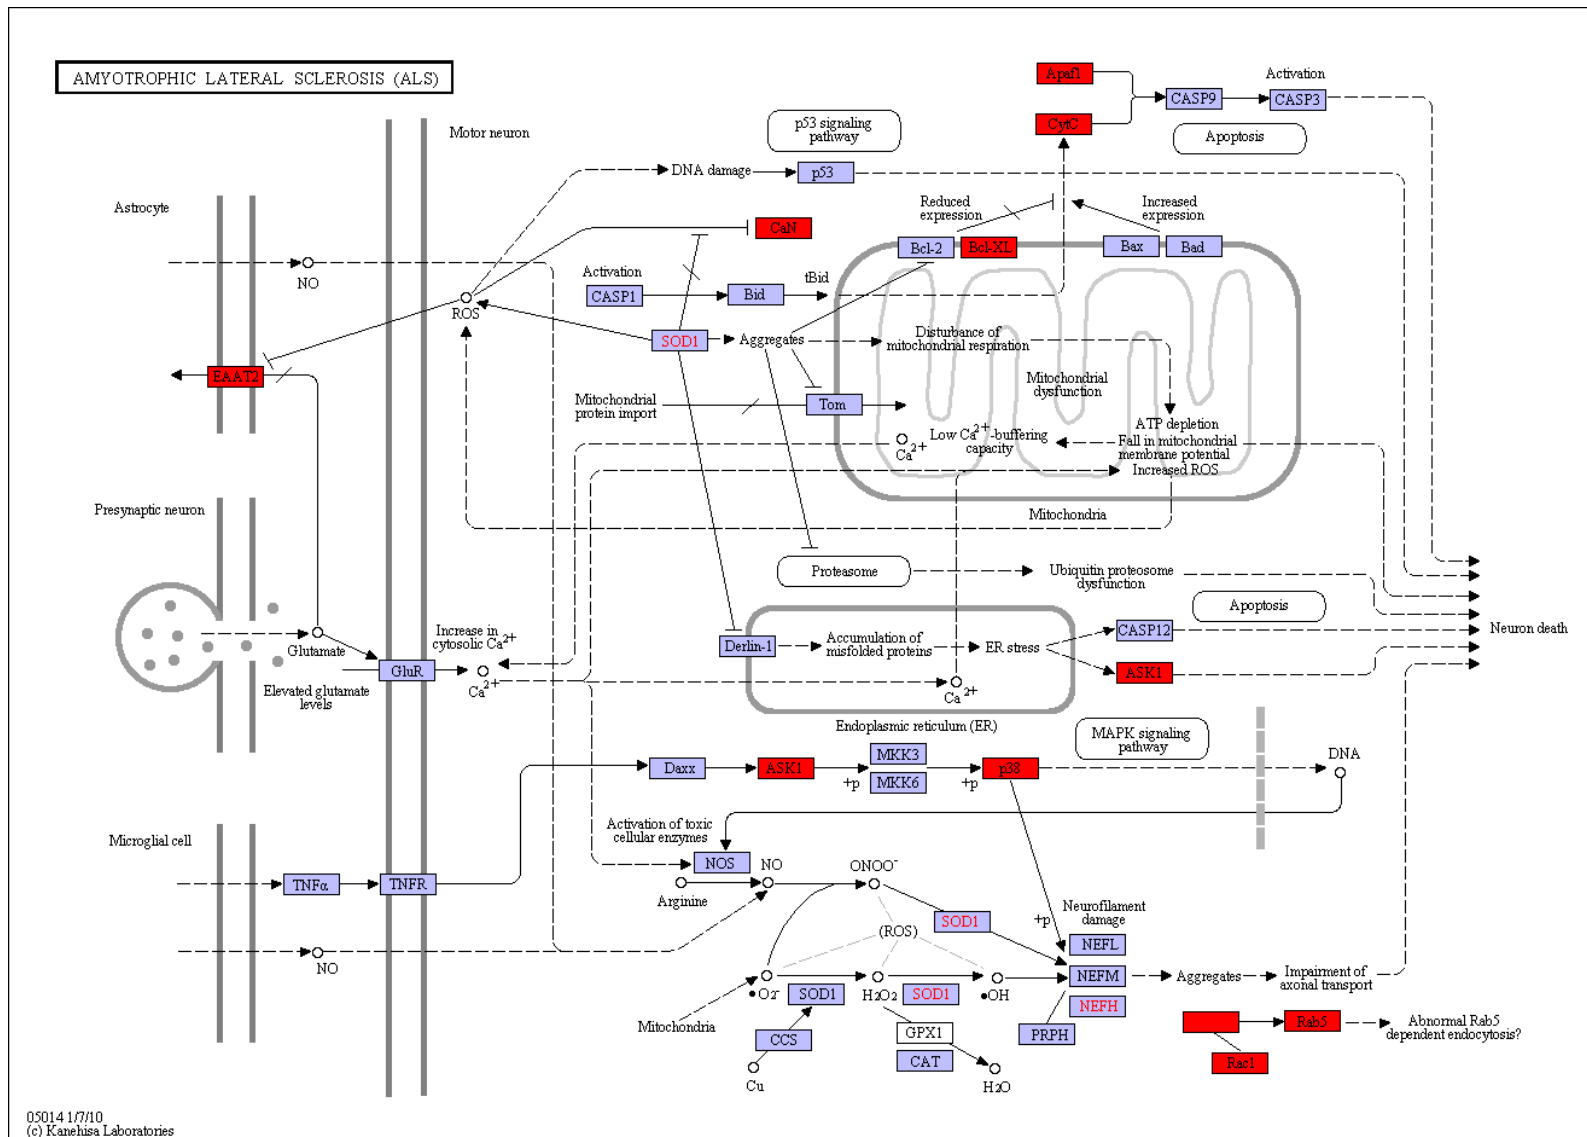

Figure 129: ko05014 Amyotrophic lateral sclerosis (ALS)

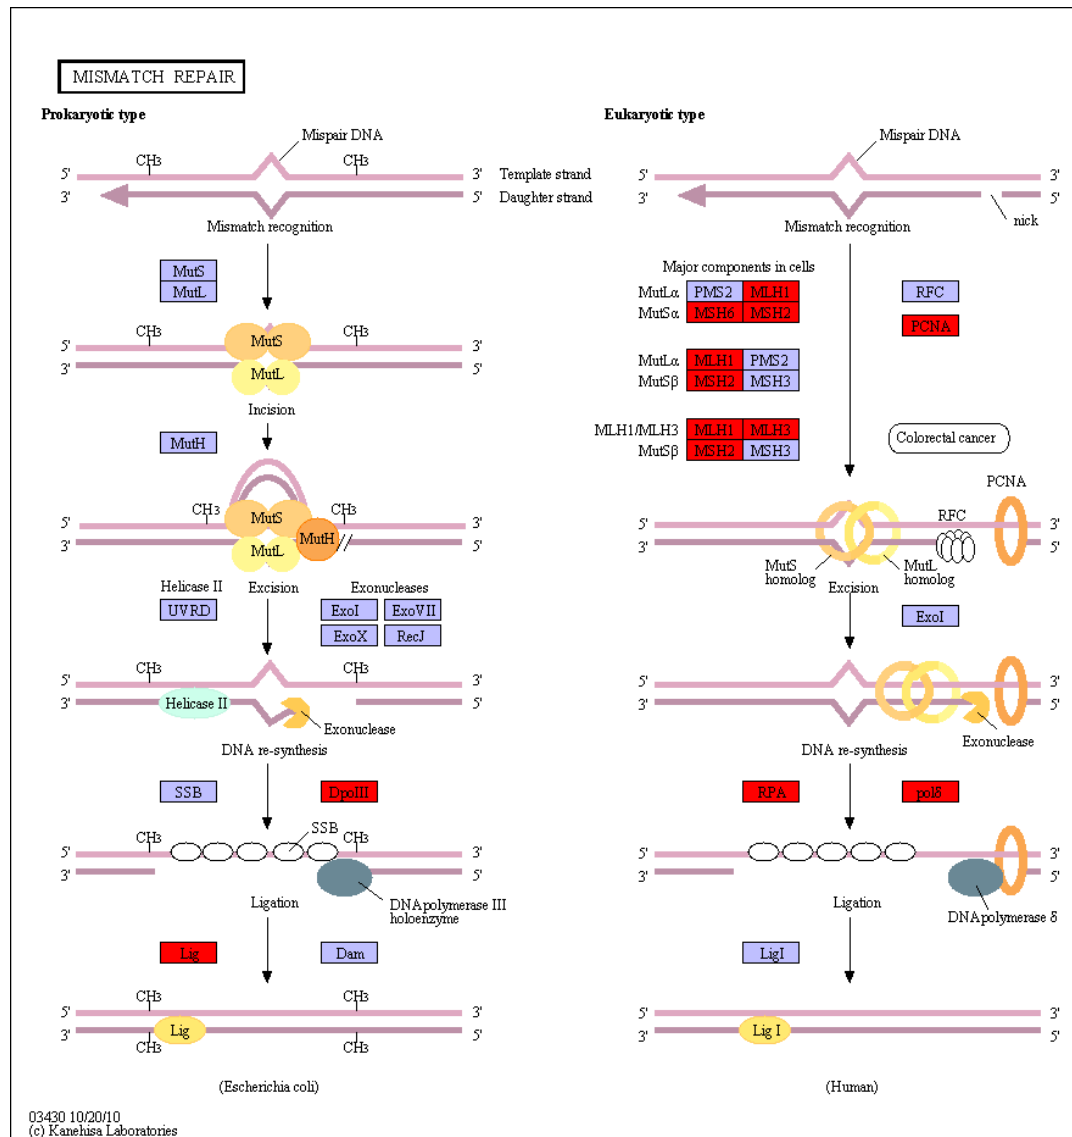

Figure 130: ko03430 Mismatch repair



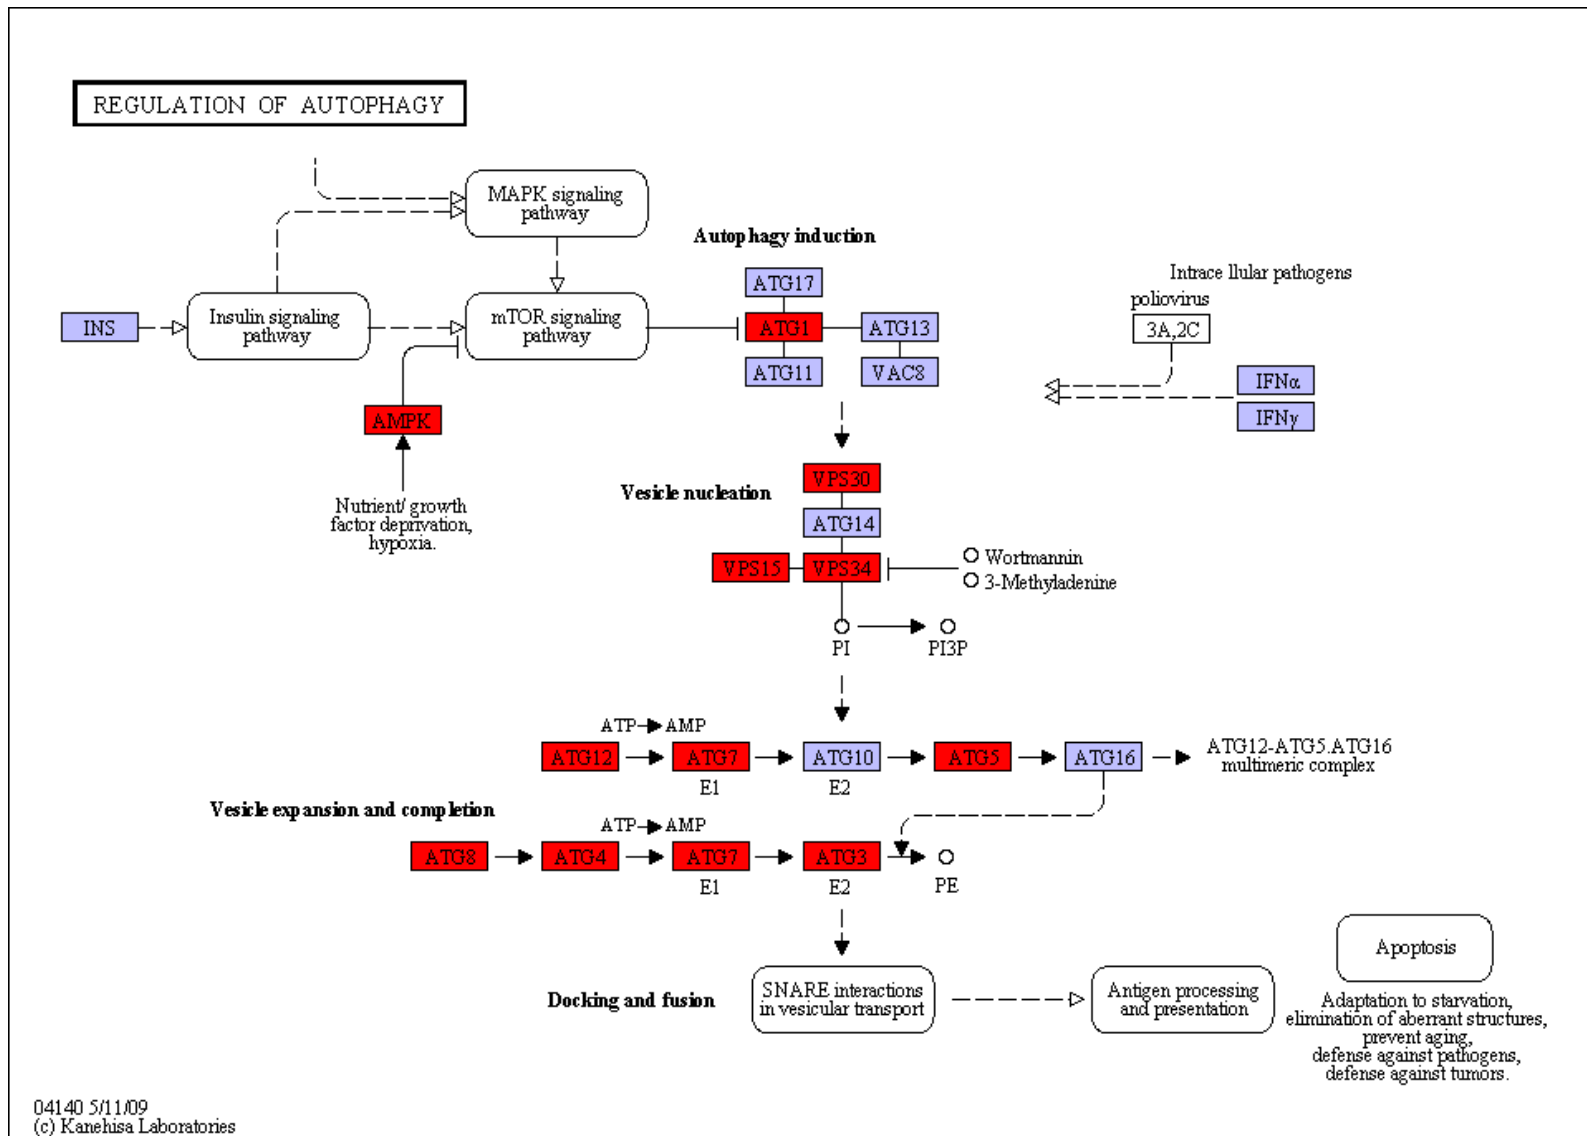

Figure 132: ko04140 Regulation of autophagy



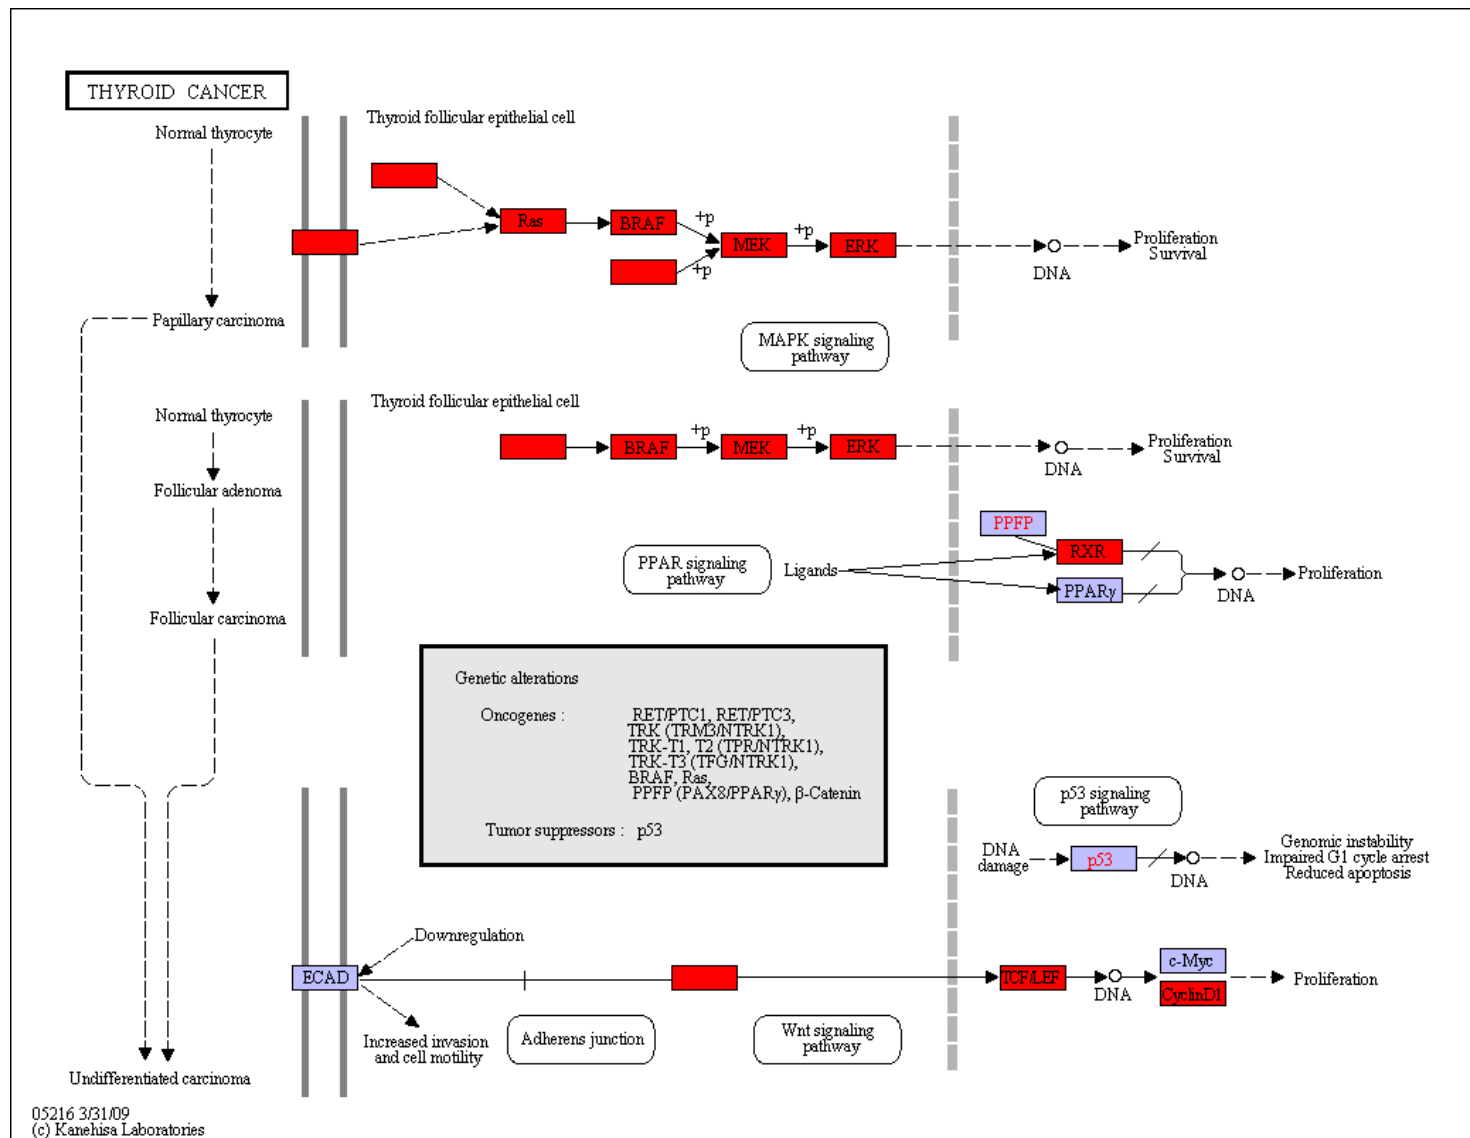

Figure 134: ko05216 Thyroid cancer

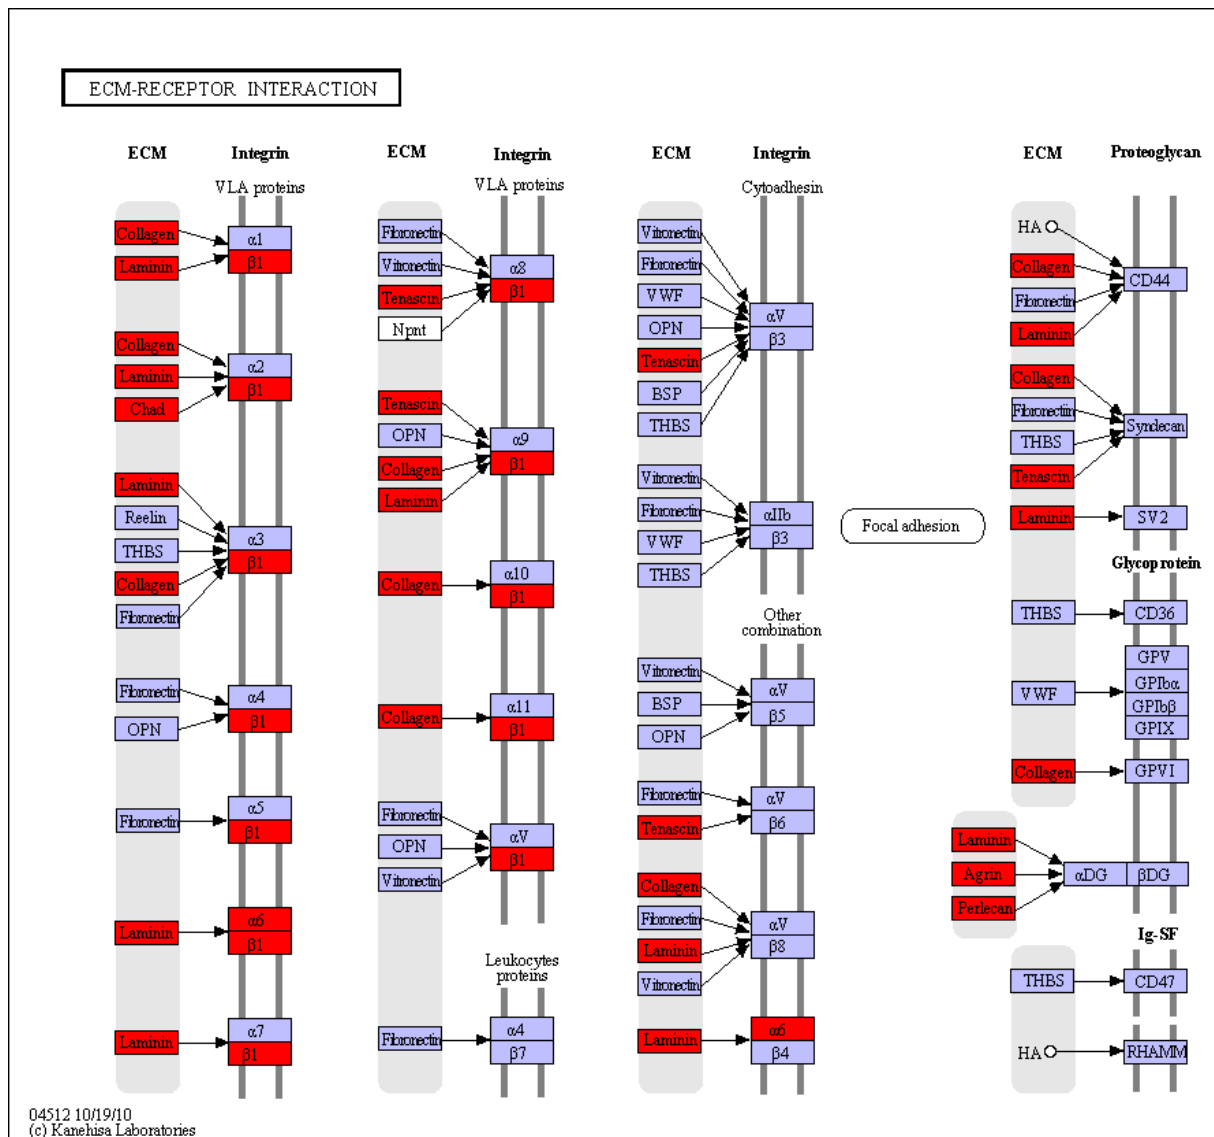

Figure 135: ko04512 ECM-receptor interaction



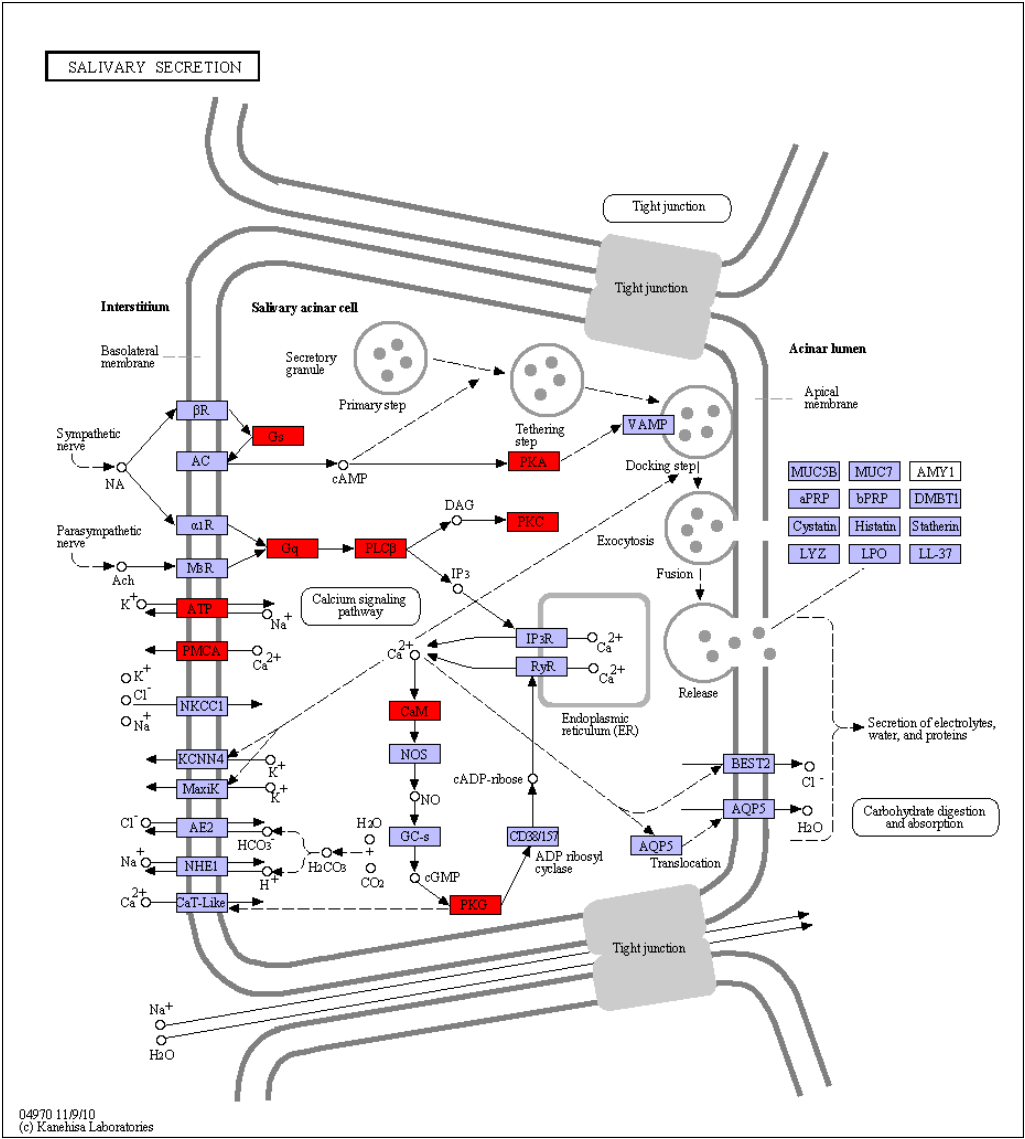

Figure 136: ko04970 Salivary secretion



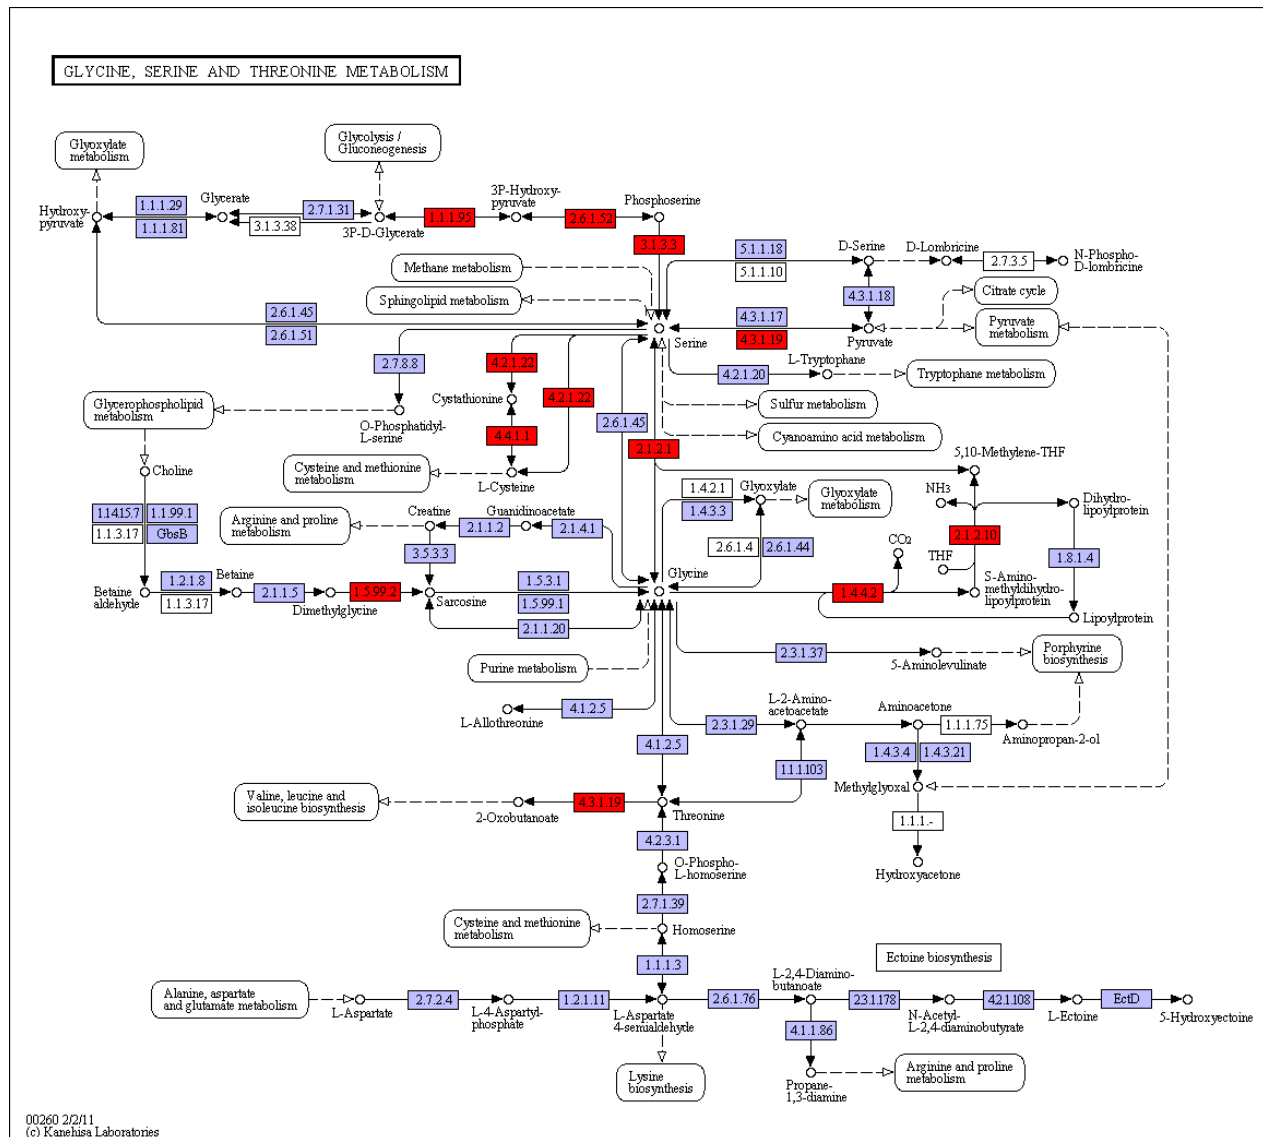

Figure 138: ko00260 Glycine, serine and threonine metabolism

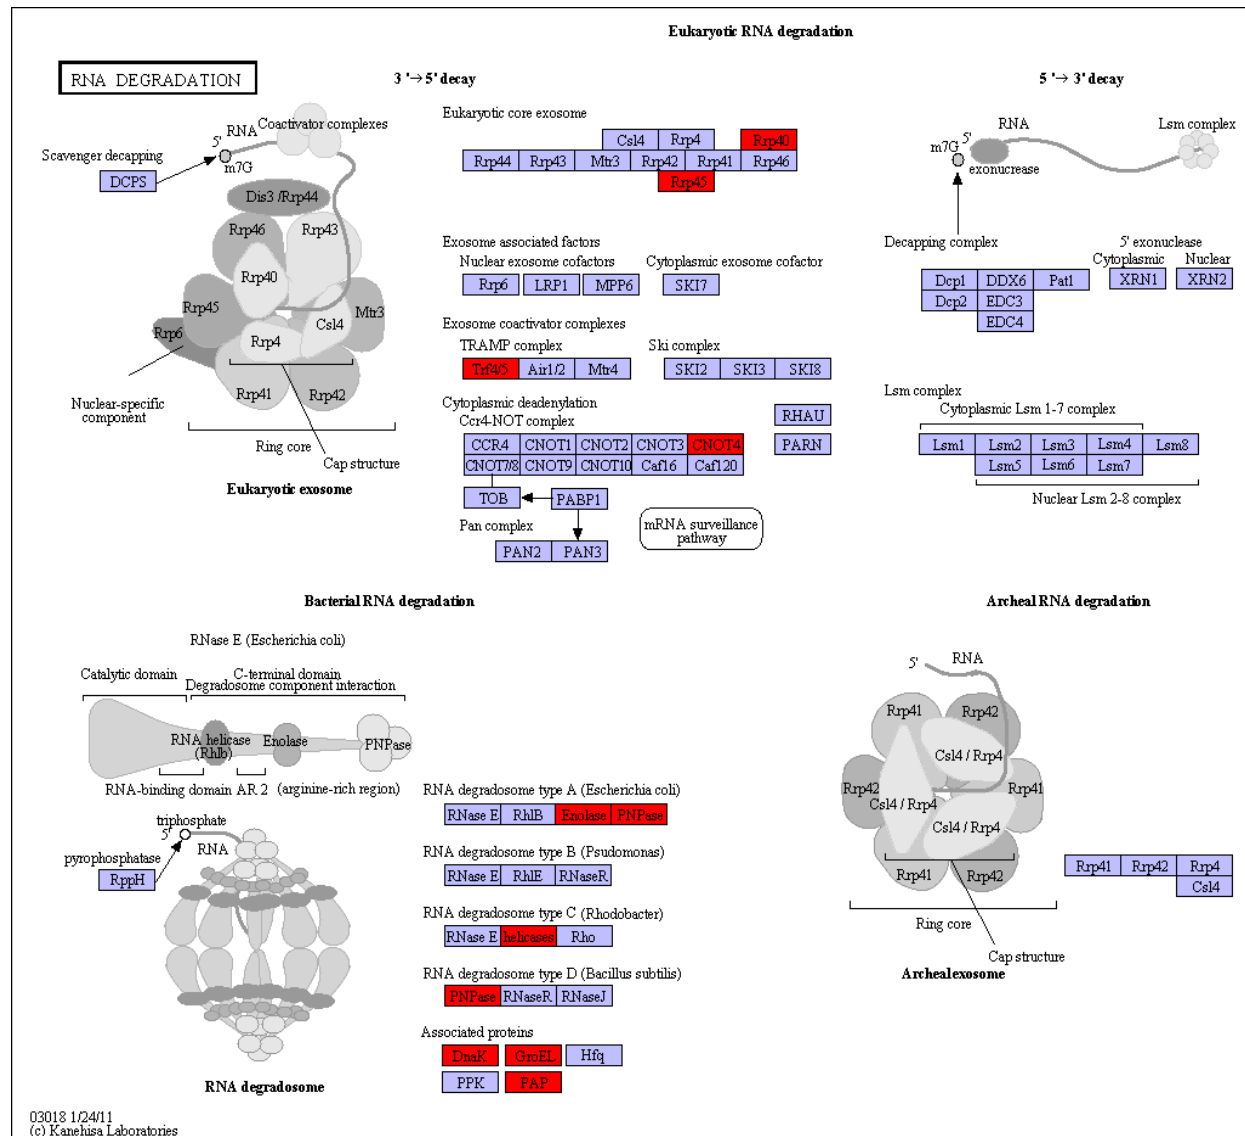

Figure 139: ko03018 RNA degradation

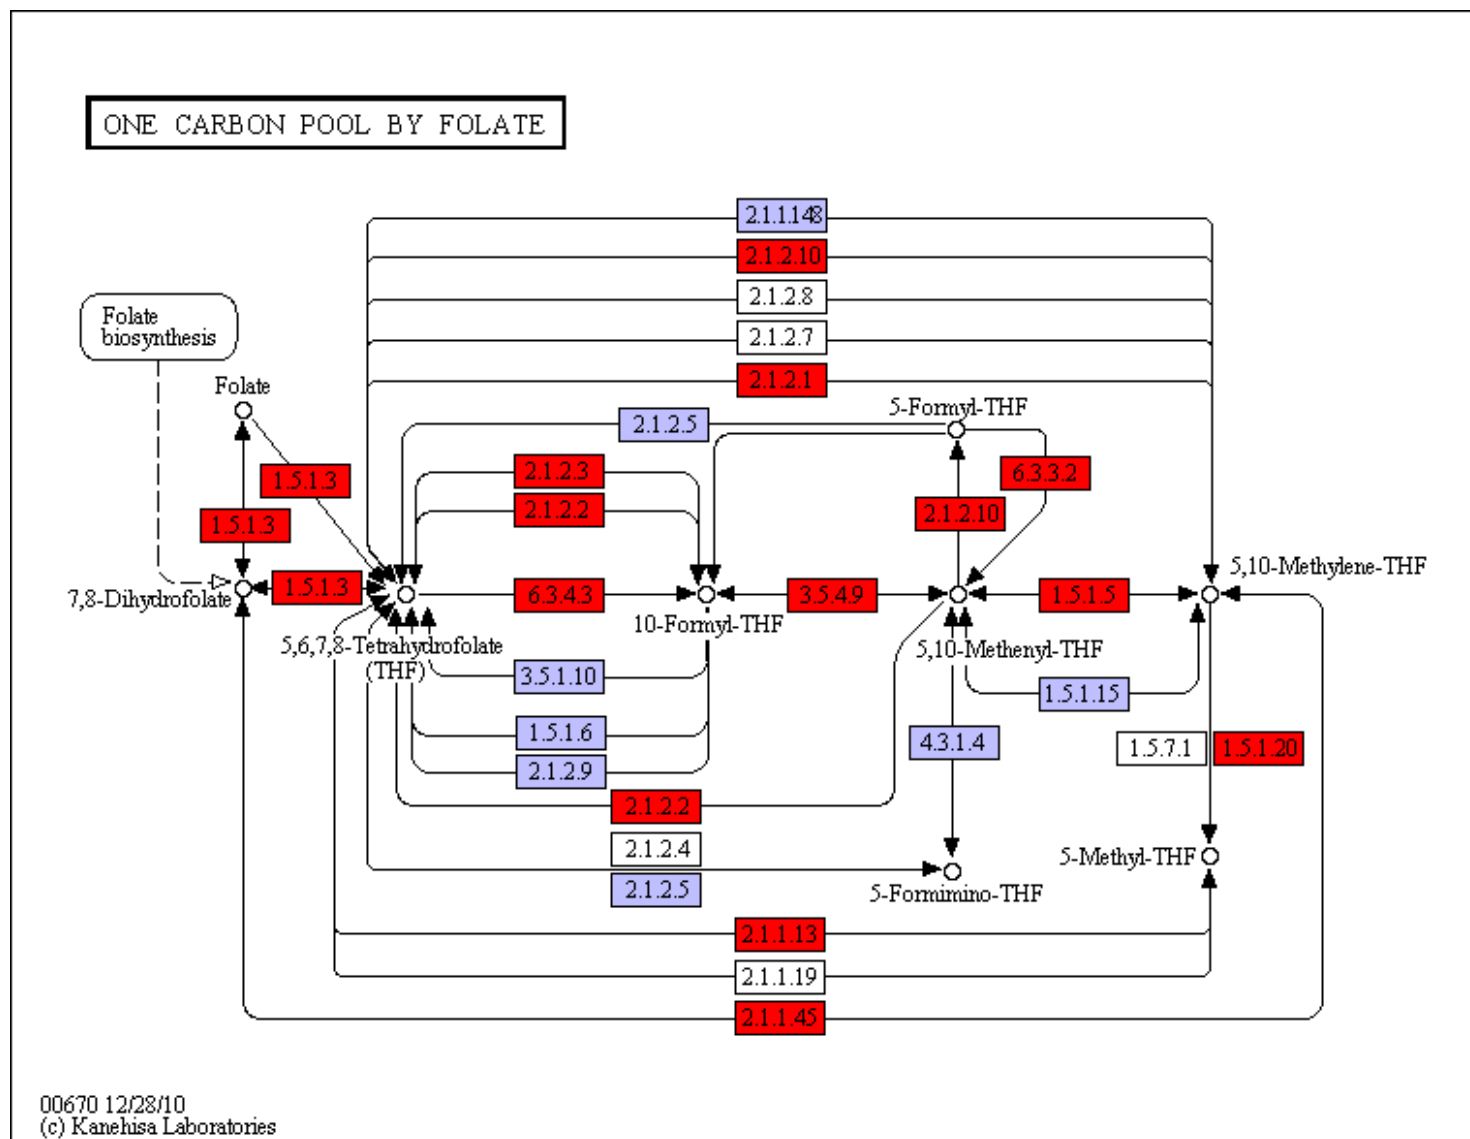

Figure 140: ko00670 One carbon pool by folate

GLYCOSAMINOGLYCAN BIOSYNTHESIS - HEPARAN SULFATE

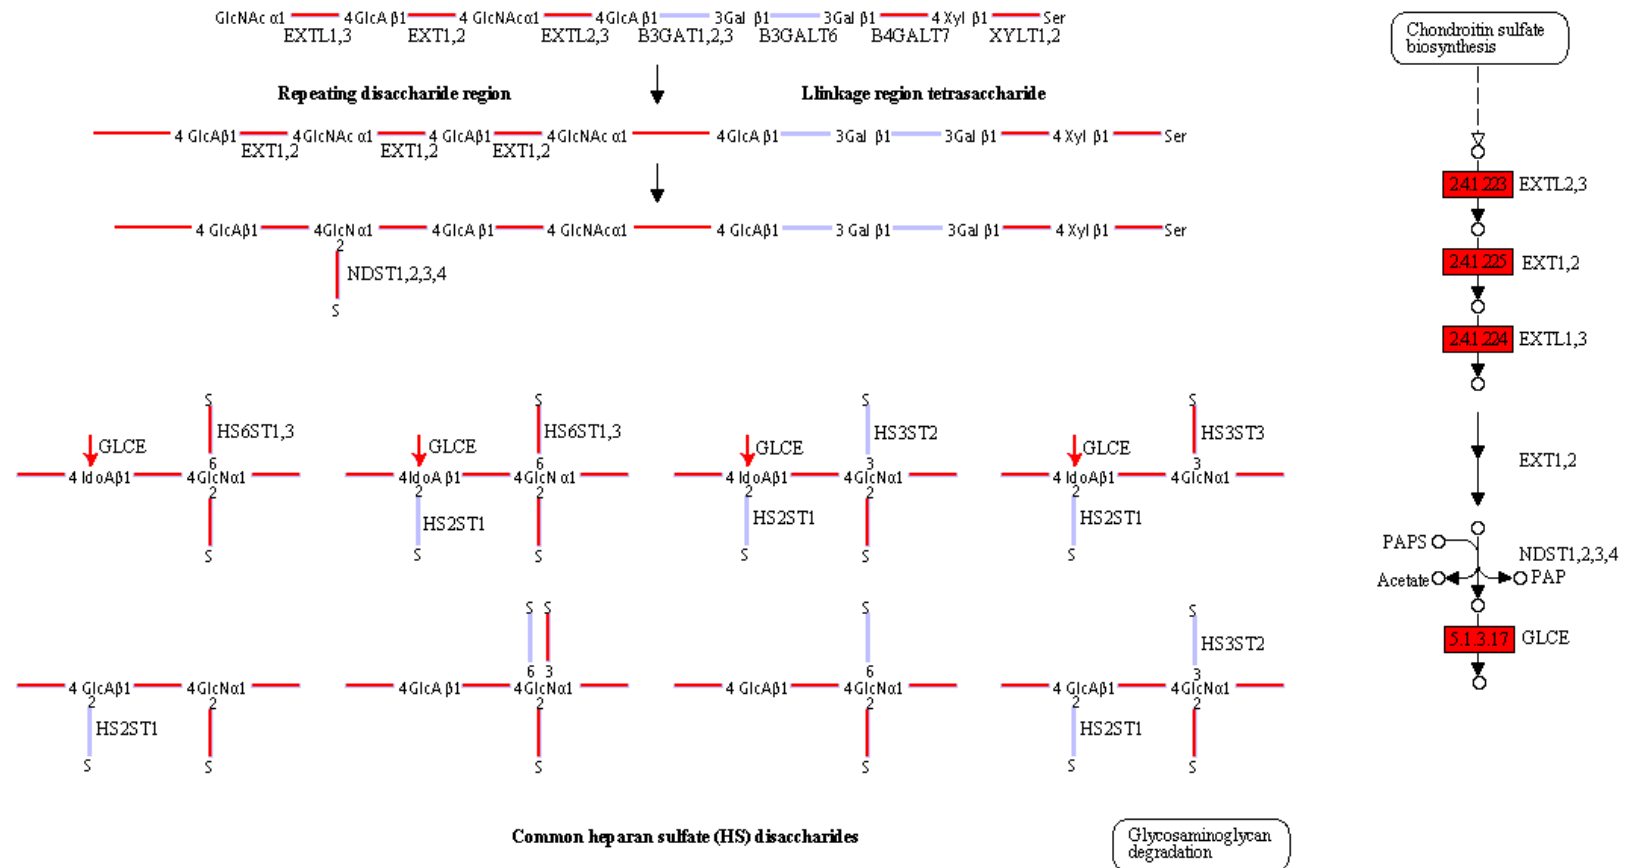

Figure 141: ko00534 Glycosaminoglycan biosynthesis - heparan sulfate



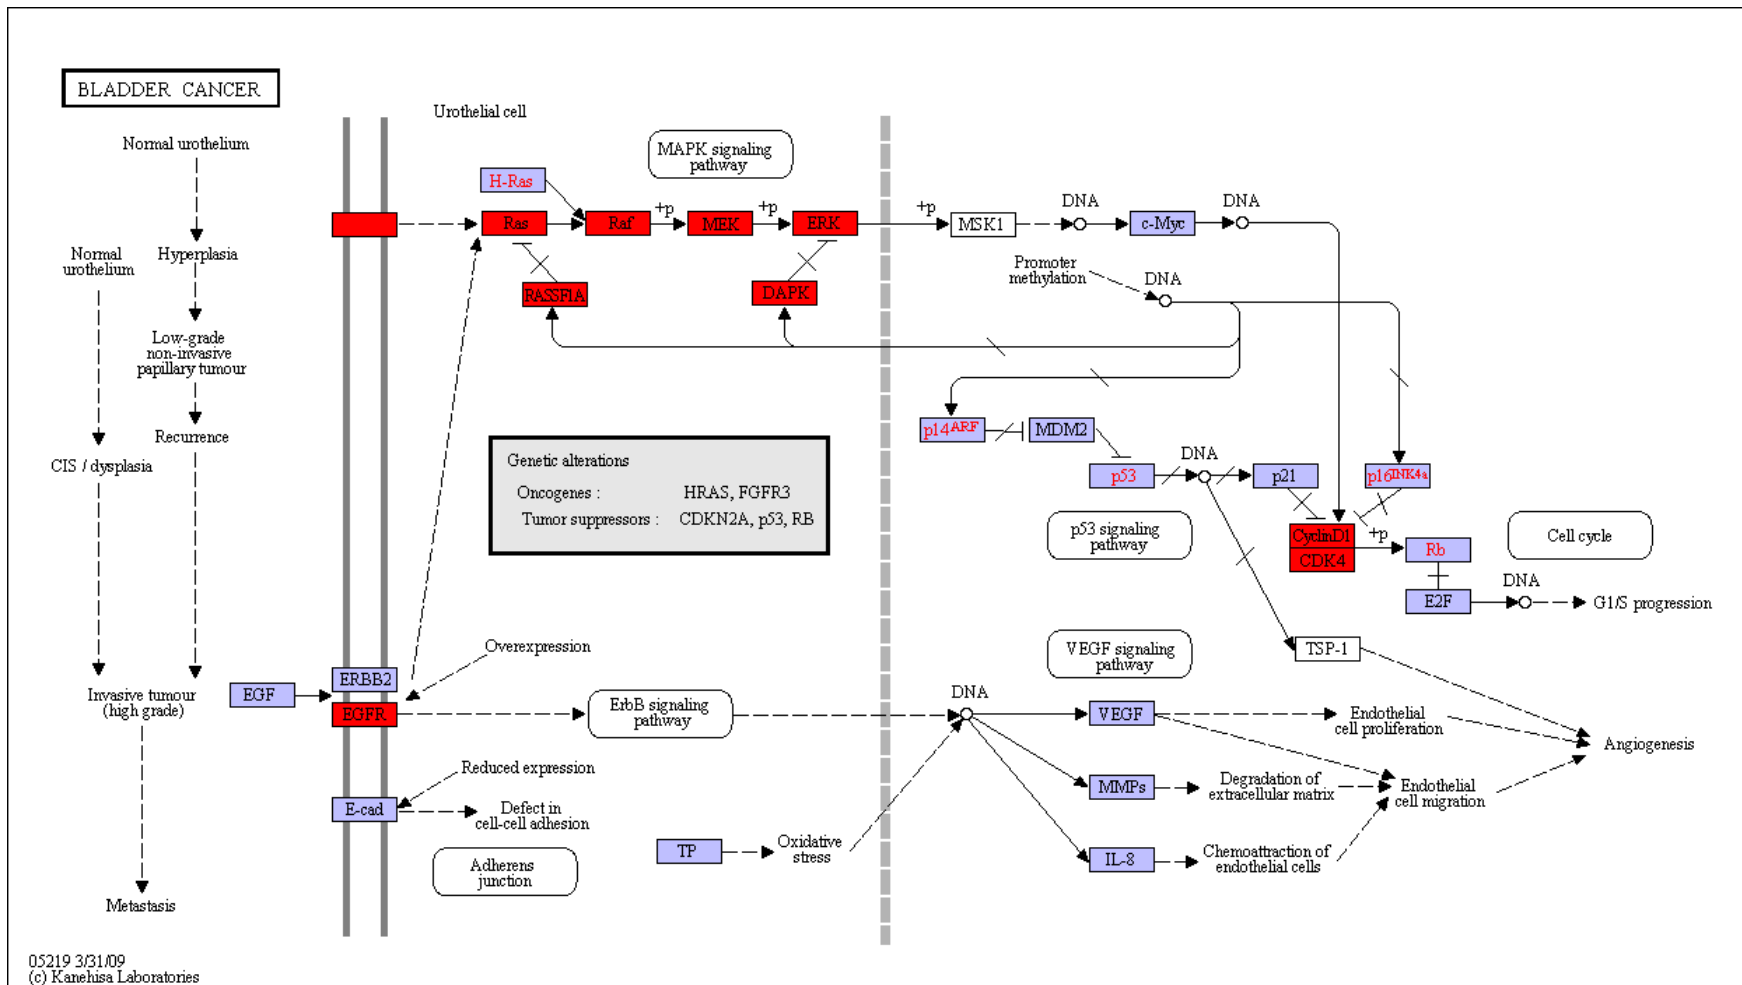

Figure 143: ko05219 Bladder cancer



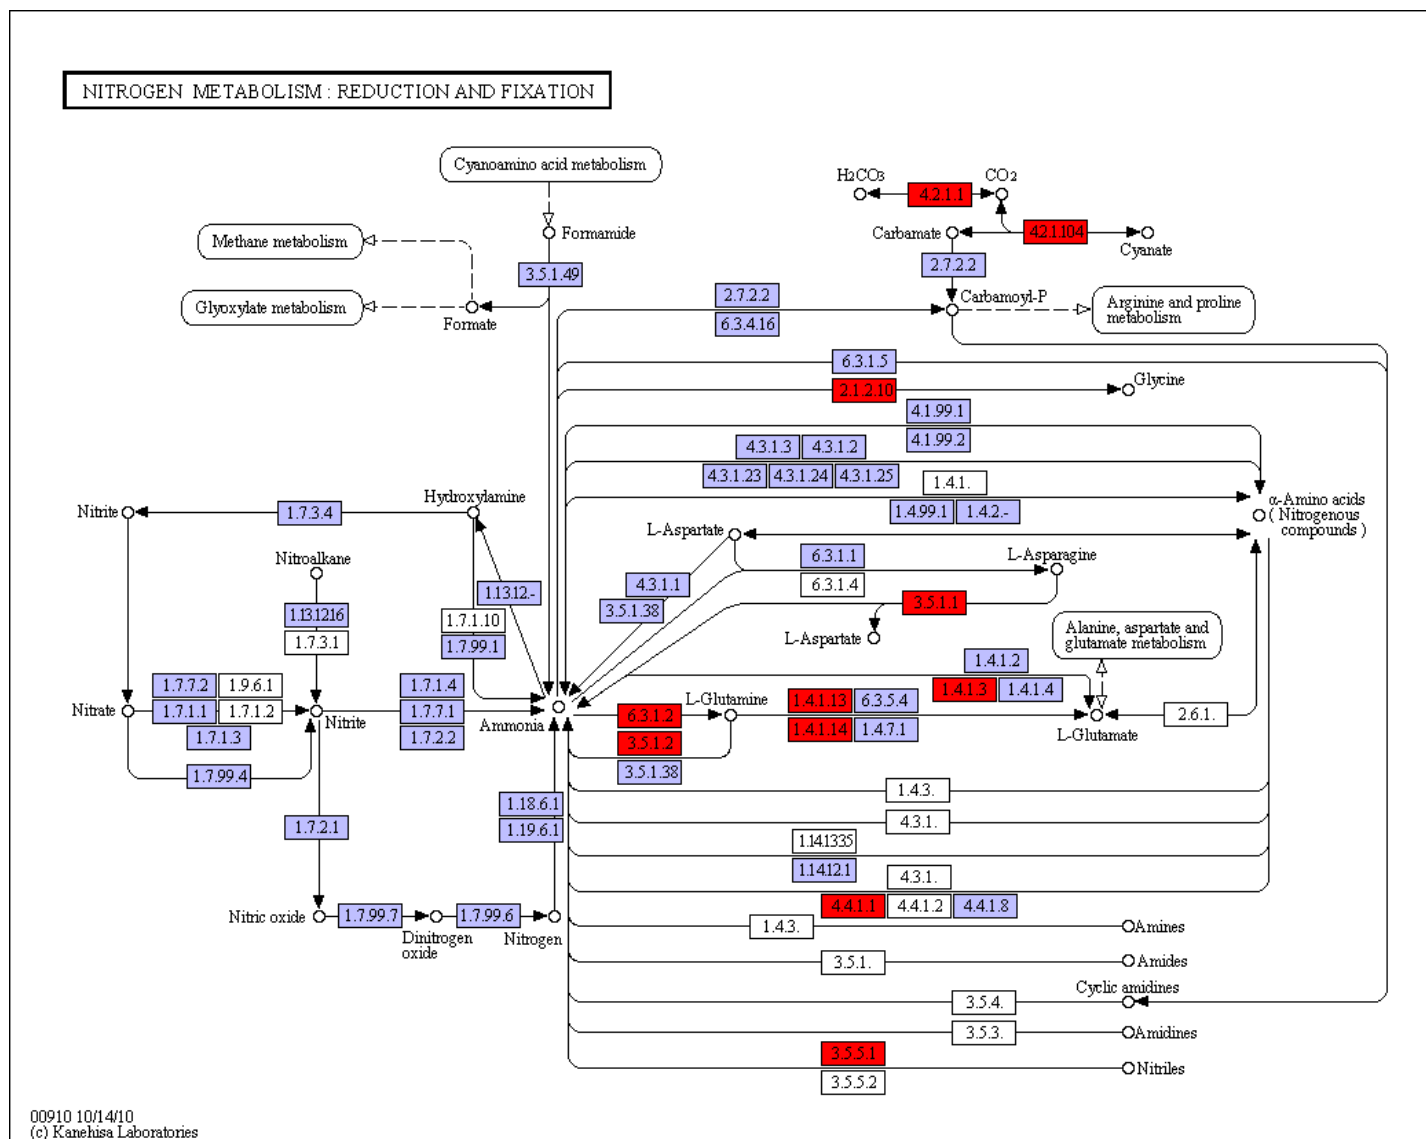

Figure 144: ko00910 Nitrogen metabolism

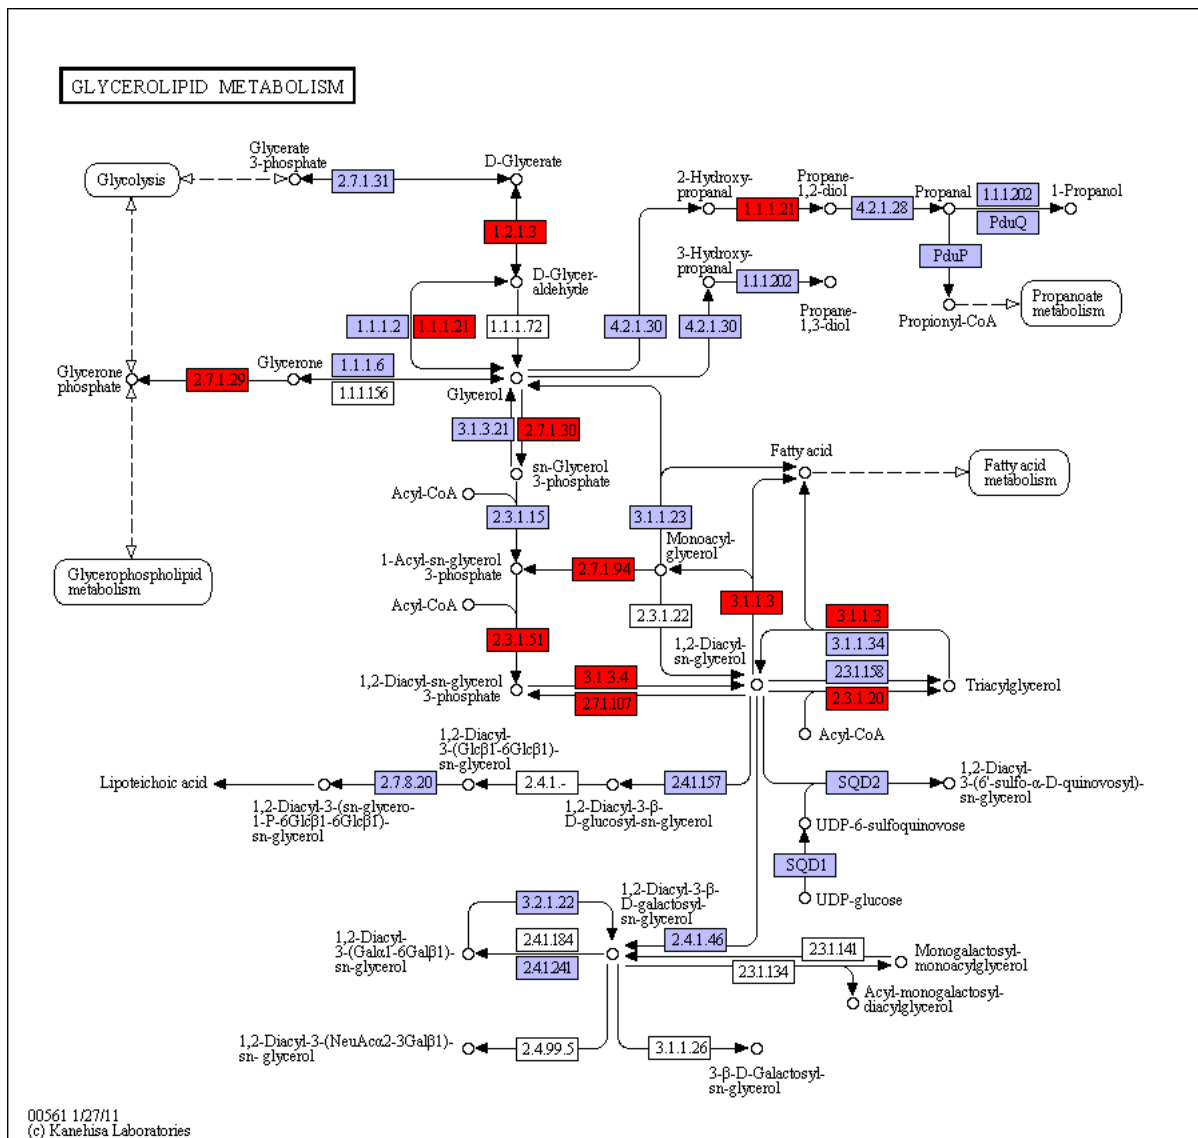

Figure 145: ko00561 Glycerolipid metabolism

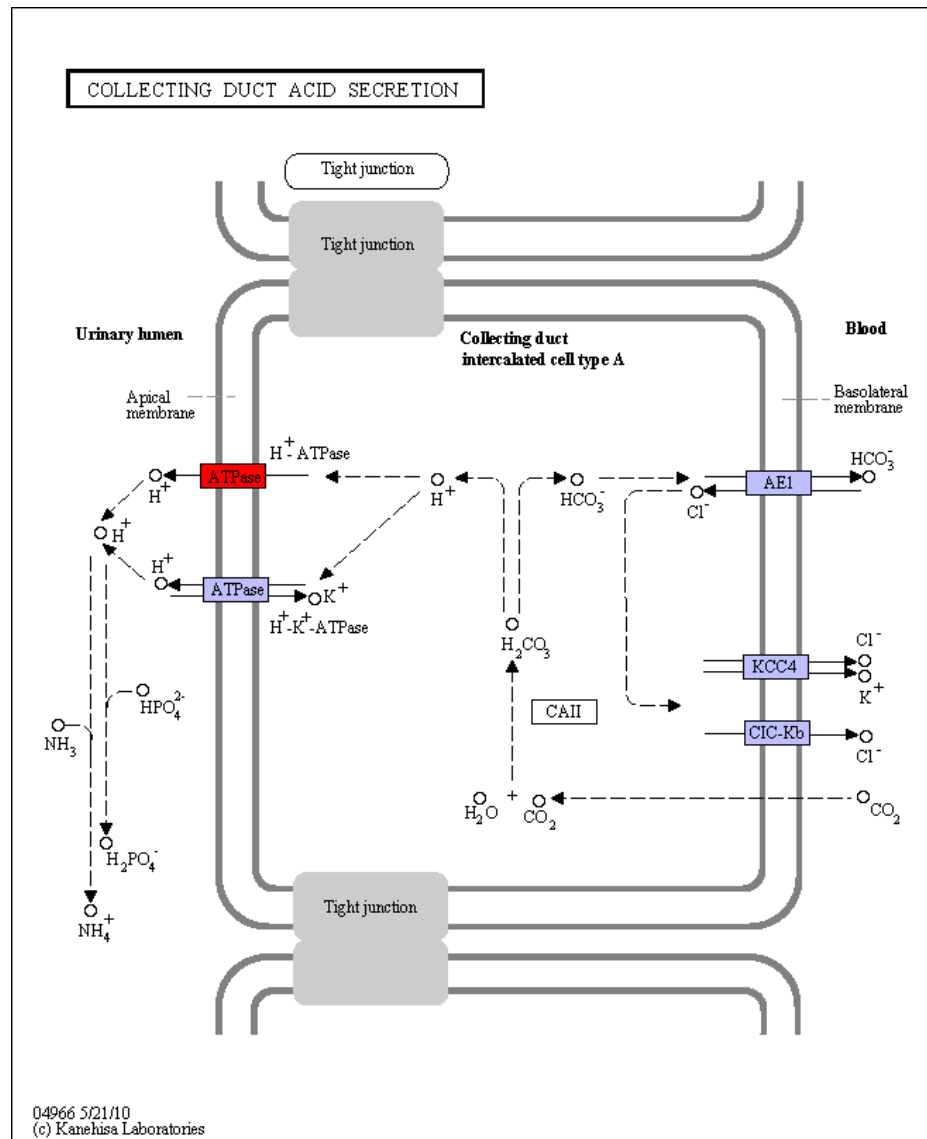

Figure 146: ko04966 Collecting duct acid secretion



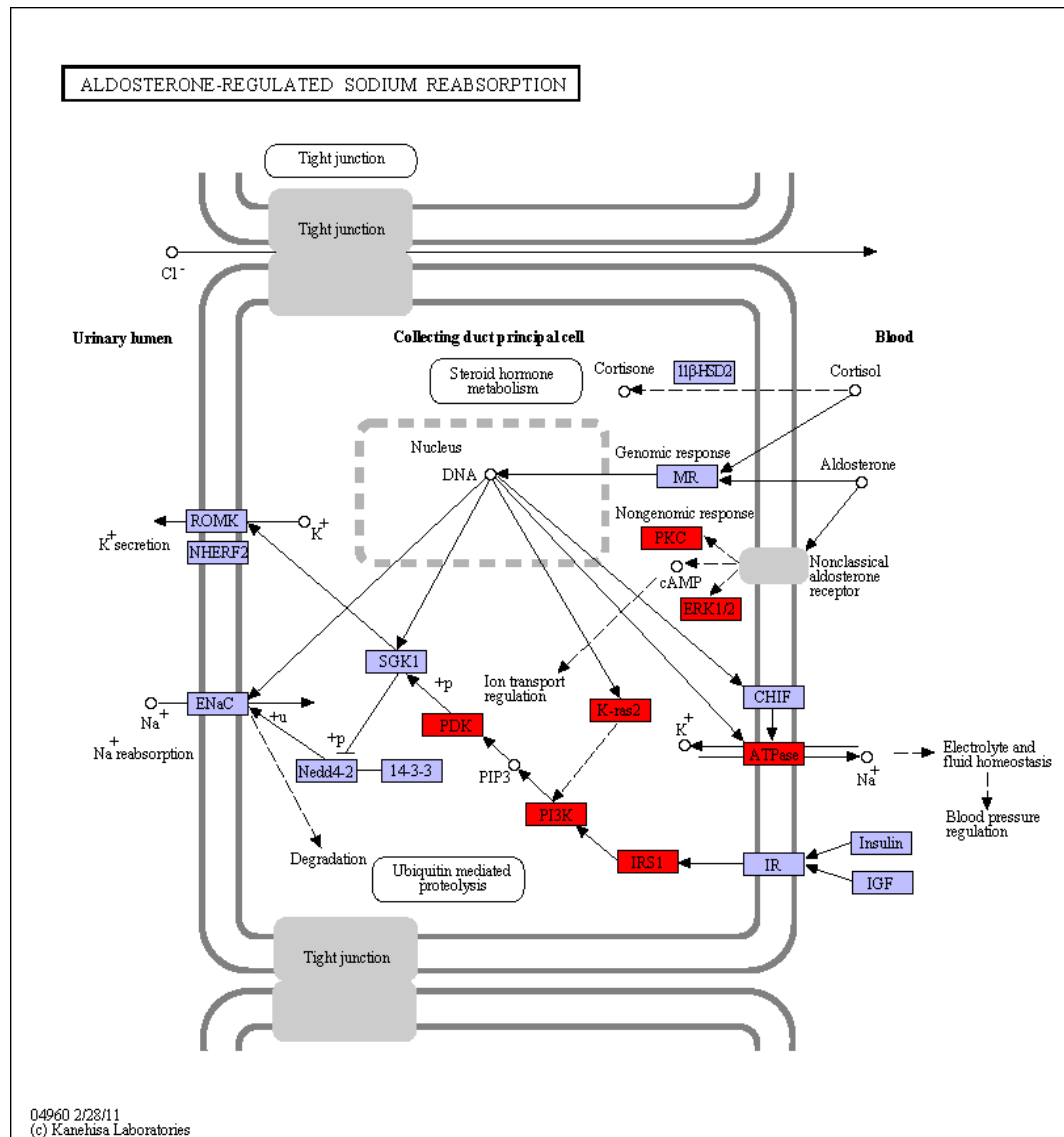

Figure 148: ko04960 Aldosterone-regulated sodium reabsorption

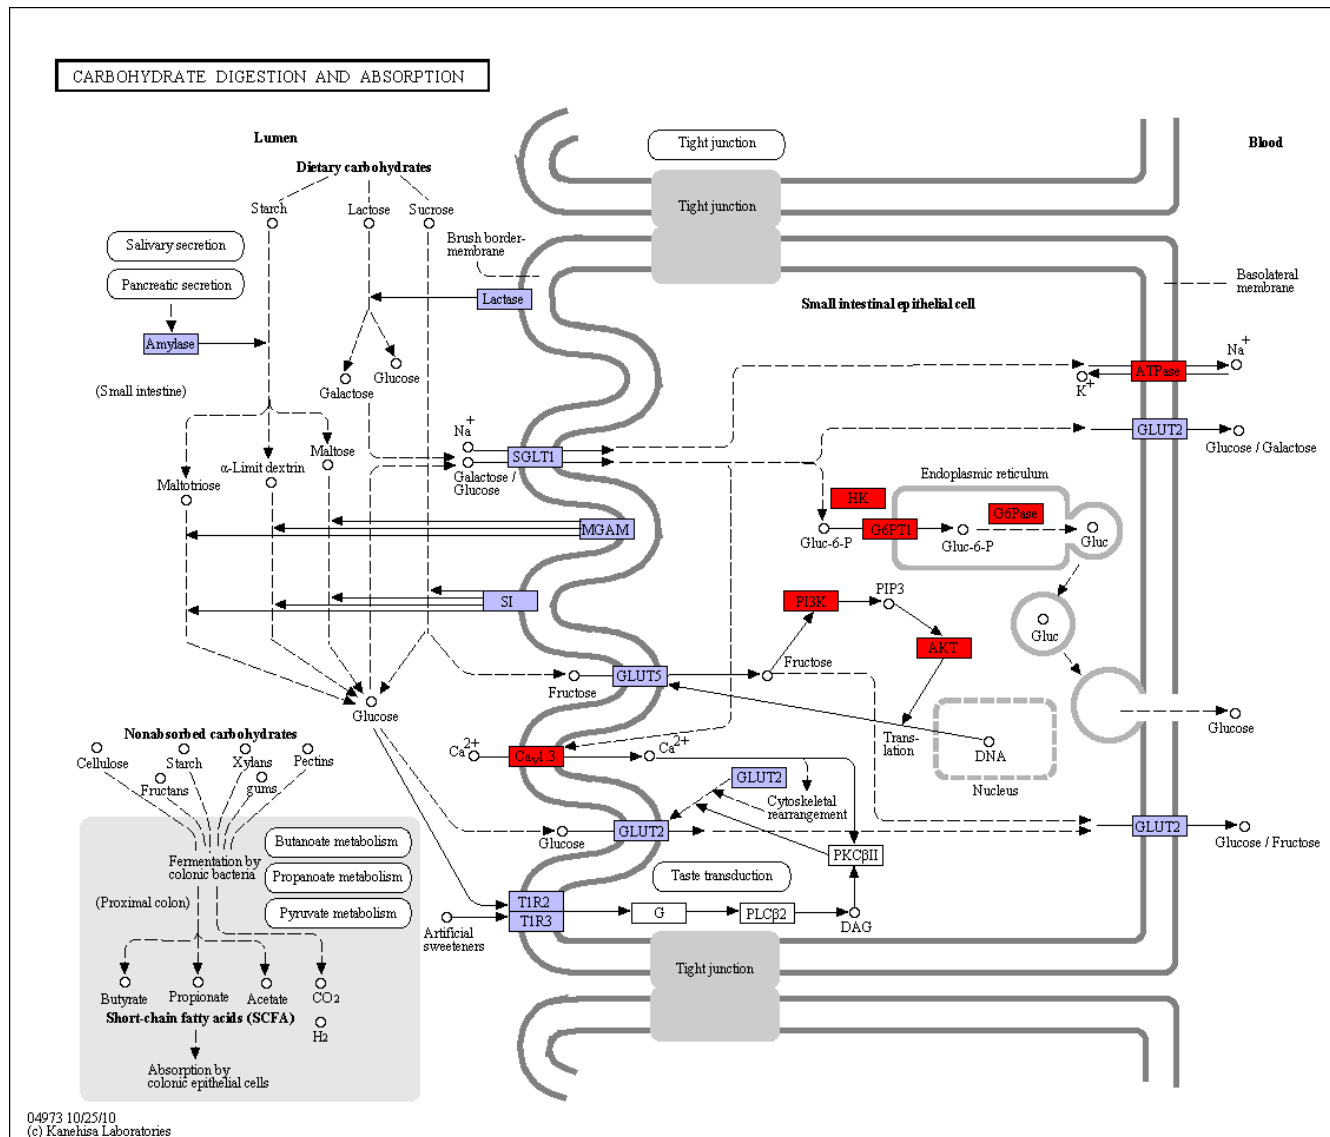

Figure 149: ko04973 Carbohydrate digestion and absorption

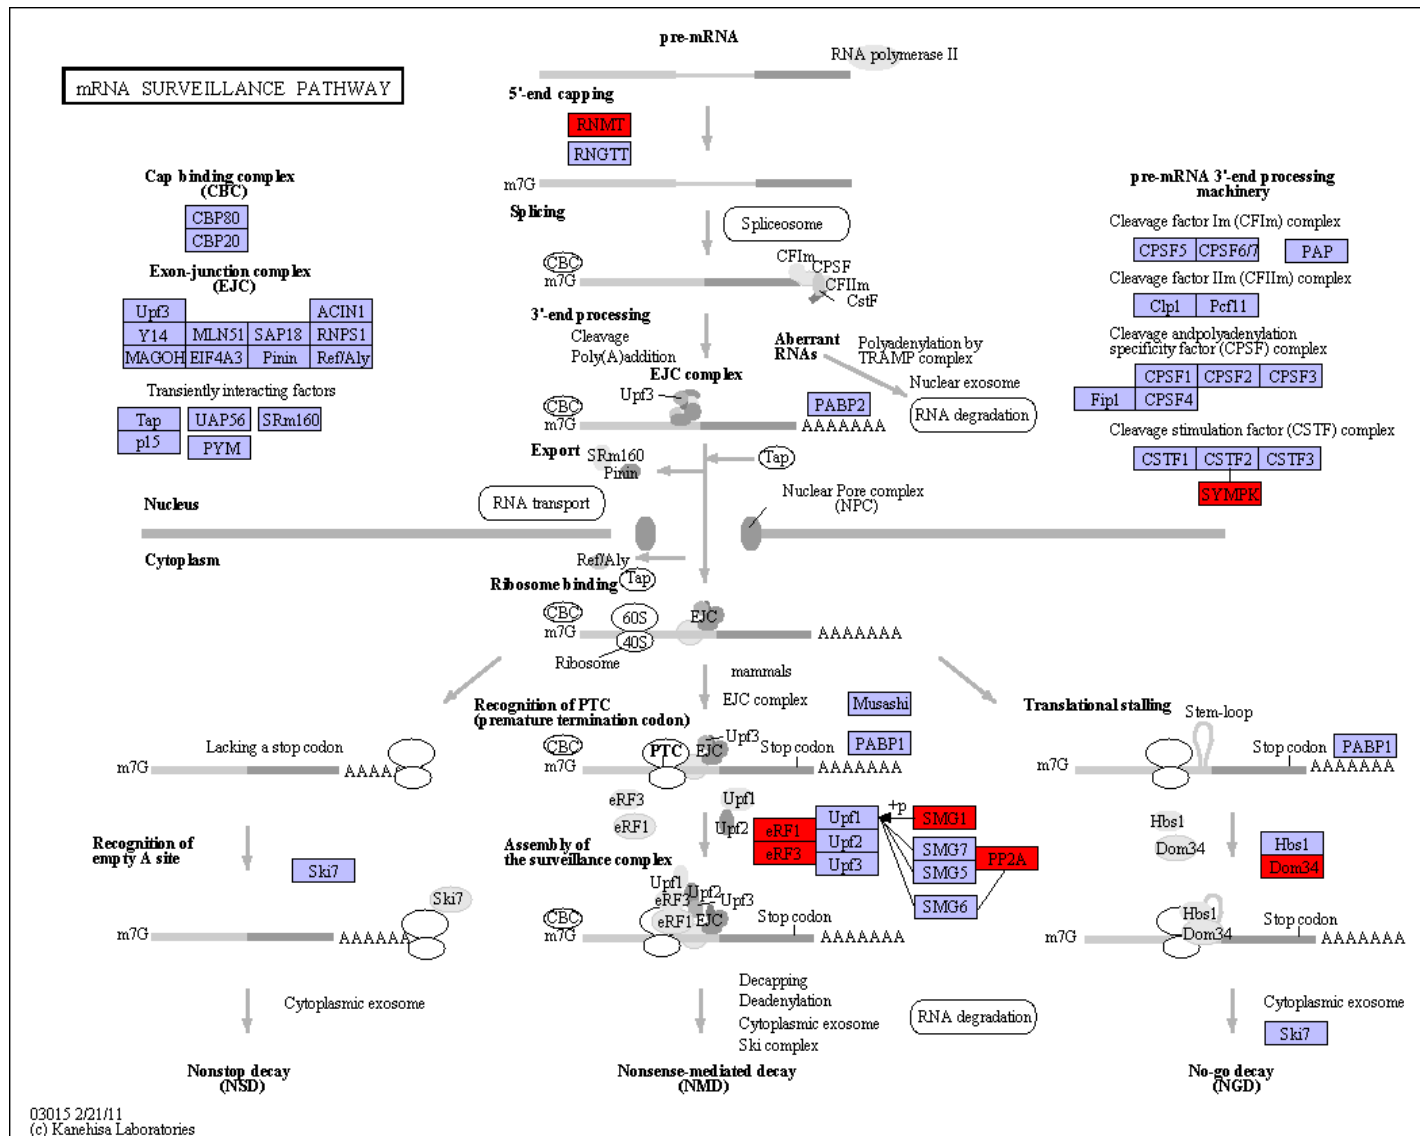

Figure 150: ko03015 mRNA surveillance pathway





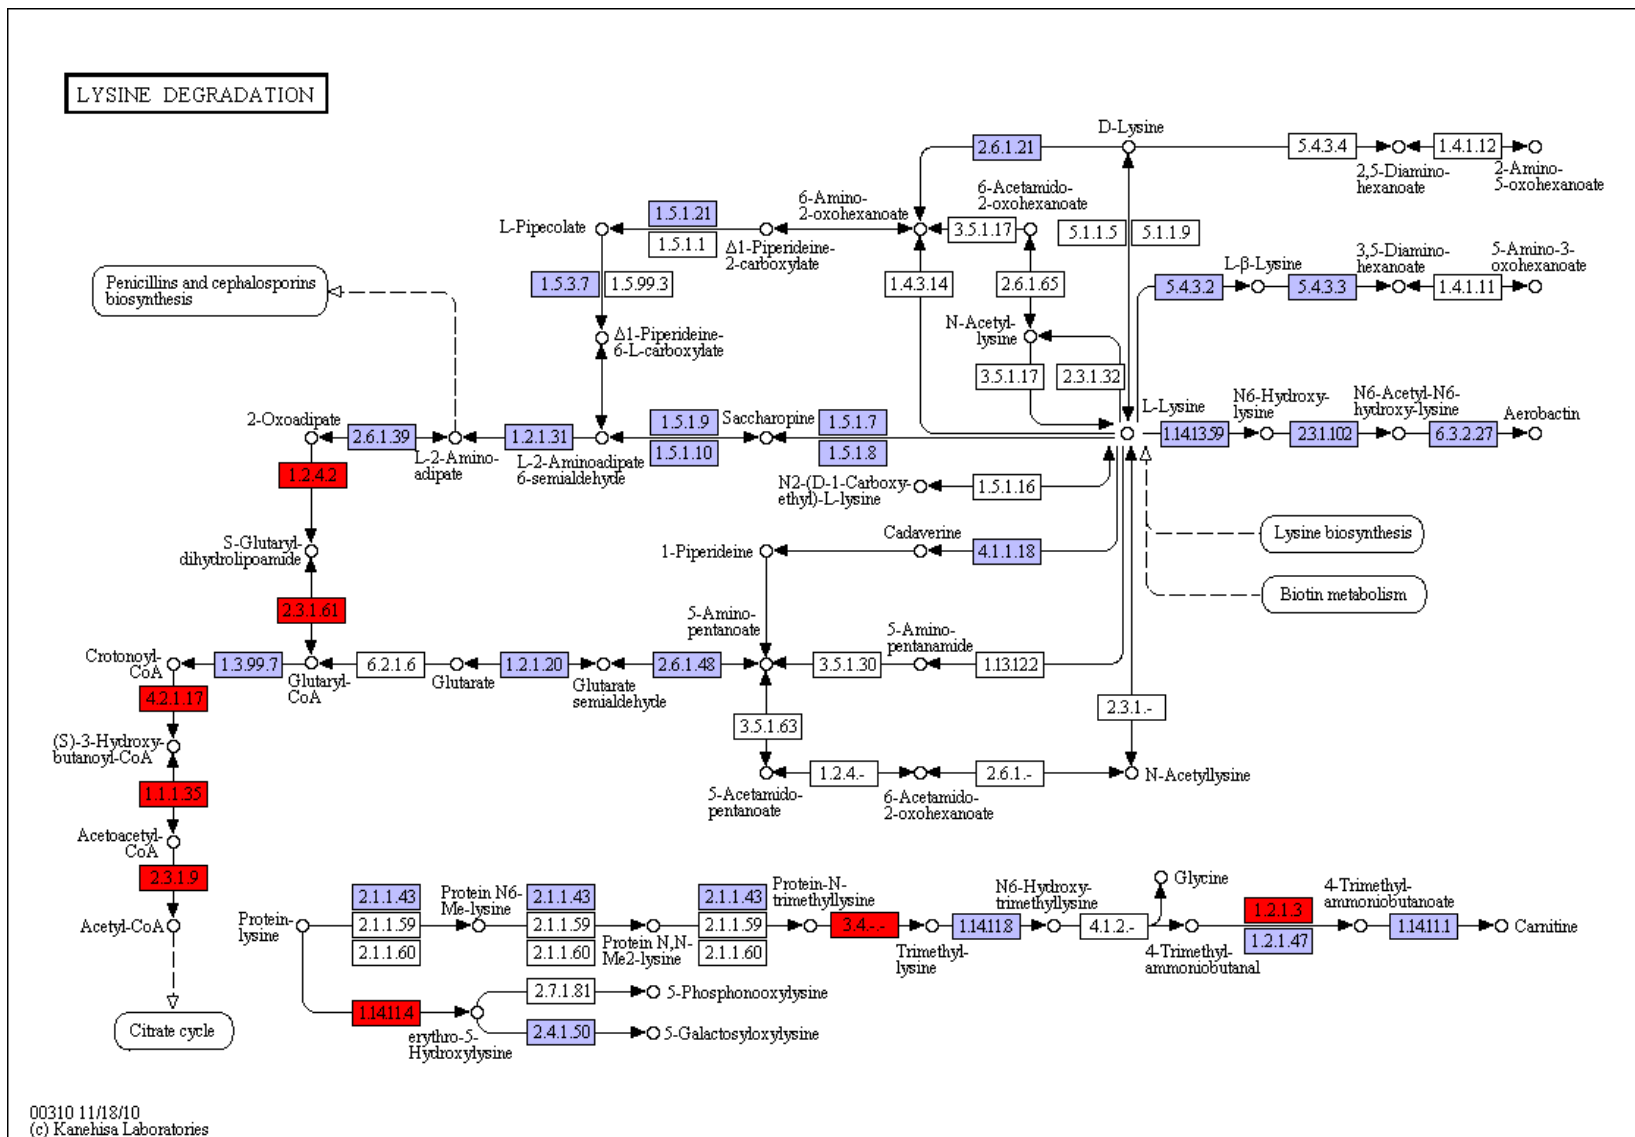

Figure 152: ko00310 Lysine degradation

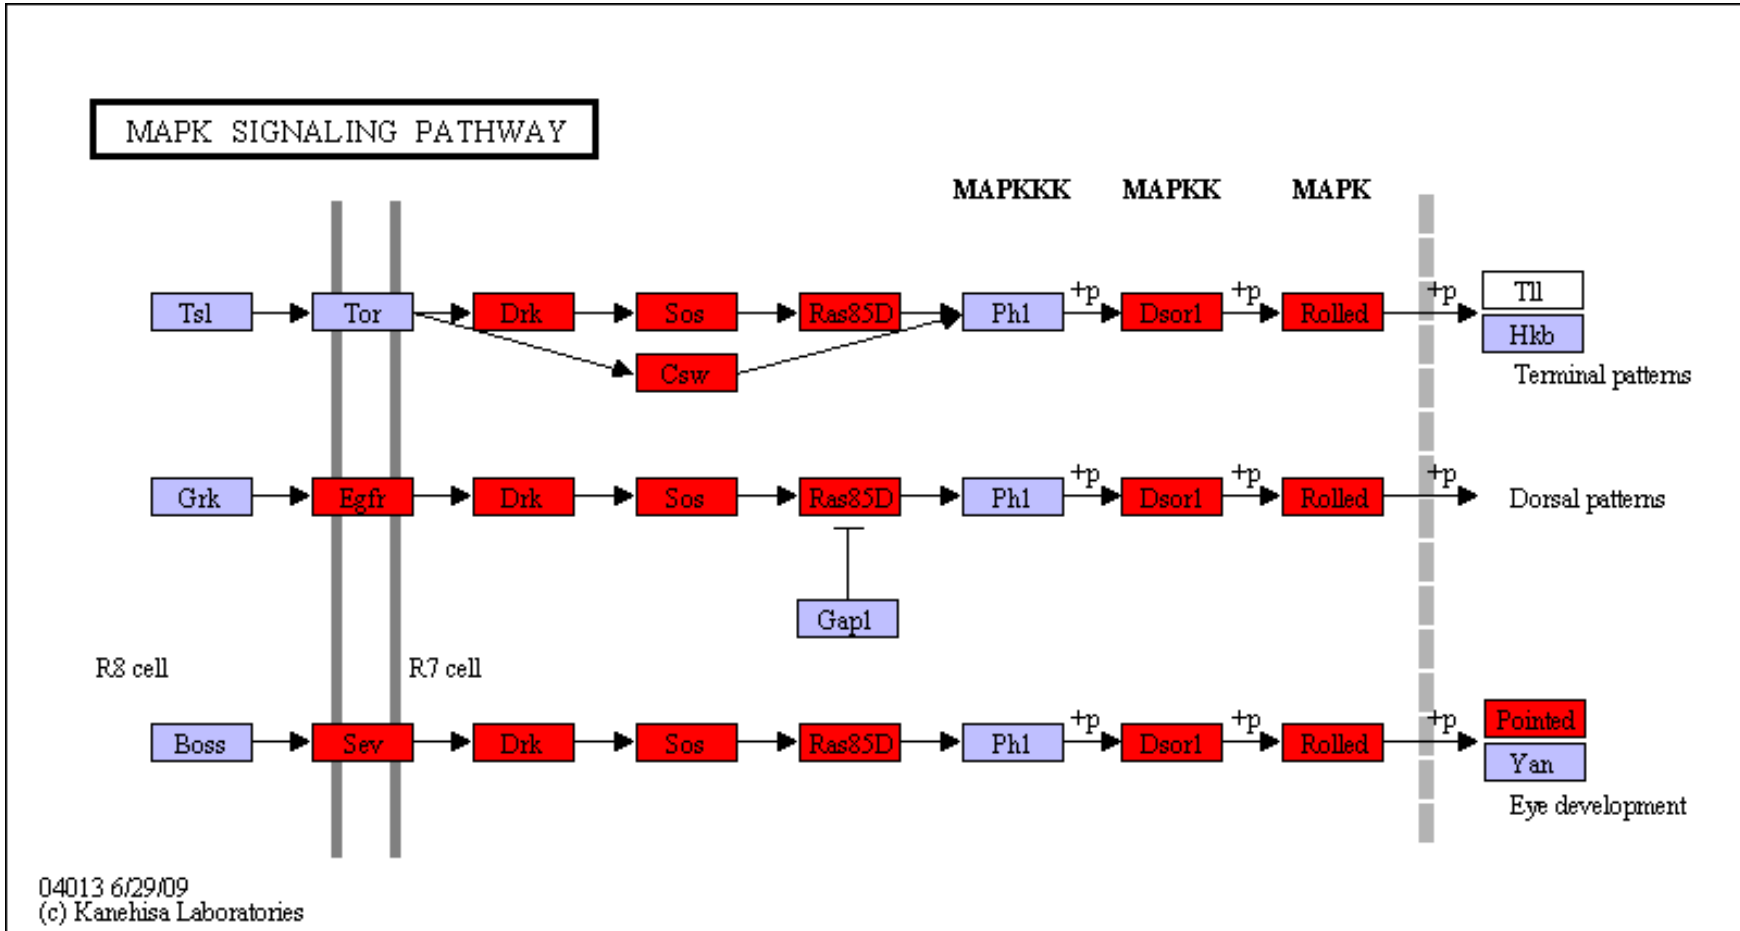

Figure 153: ko04013 MAPK signaling pathway - fly

DRUG METABOLISM - OTHER ENZYMES

Azathioprine & 6-Mercaptopurine

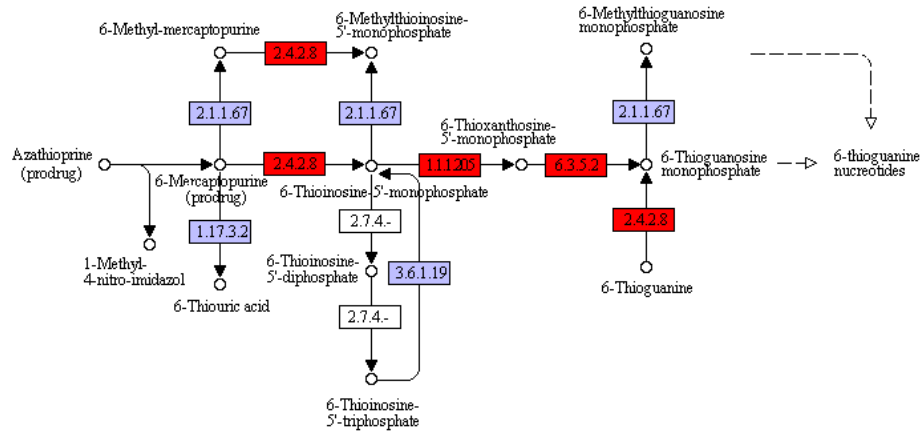

Irinotecan

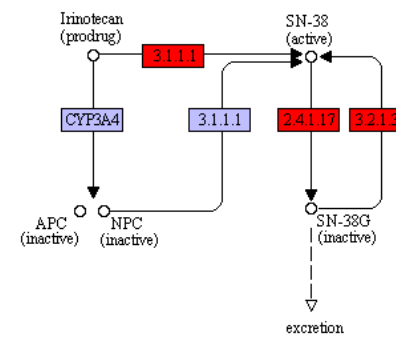

Fluorouracil

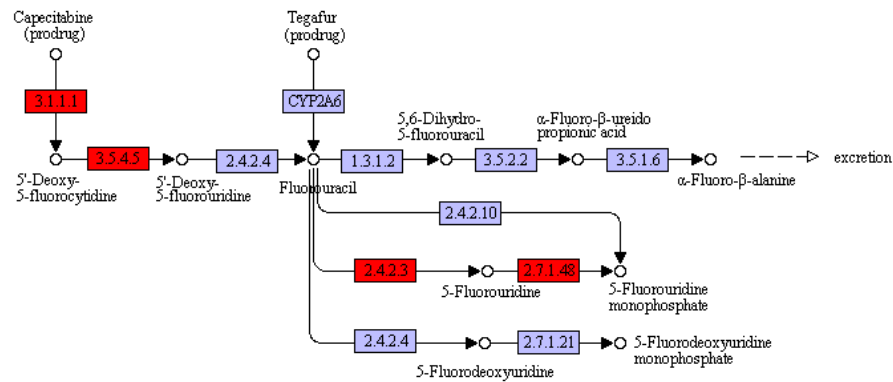

Isoniazid

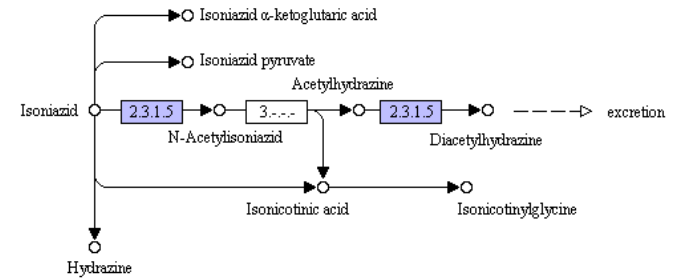

Figure 154: ko00983 Drug metabolism - other enzymes

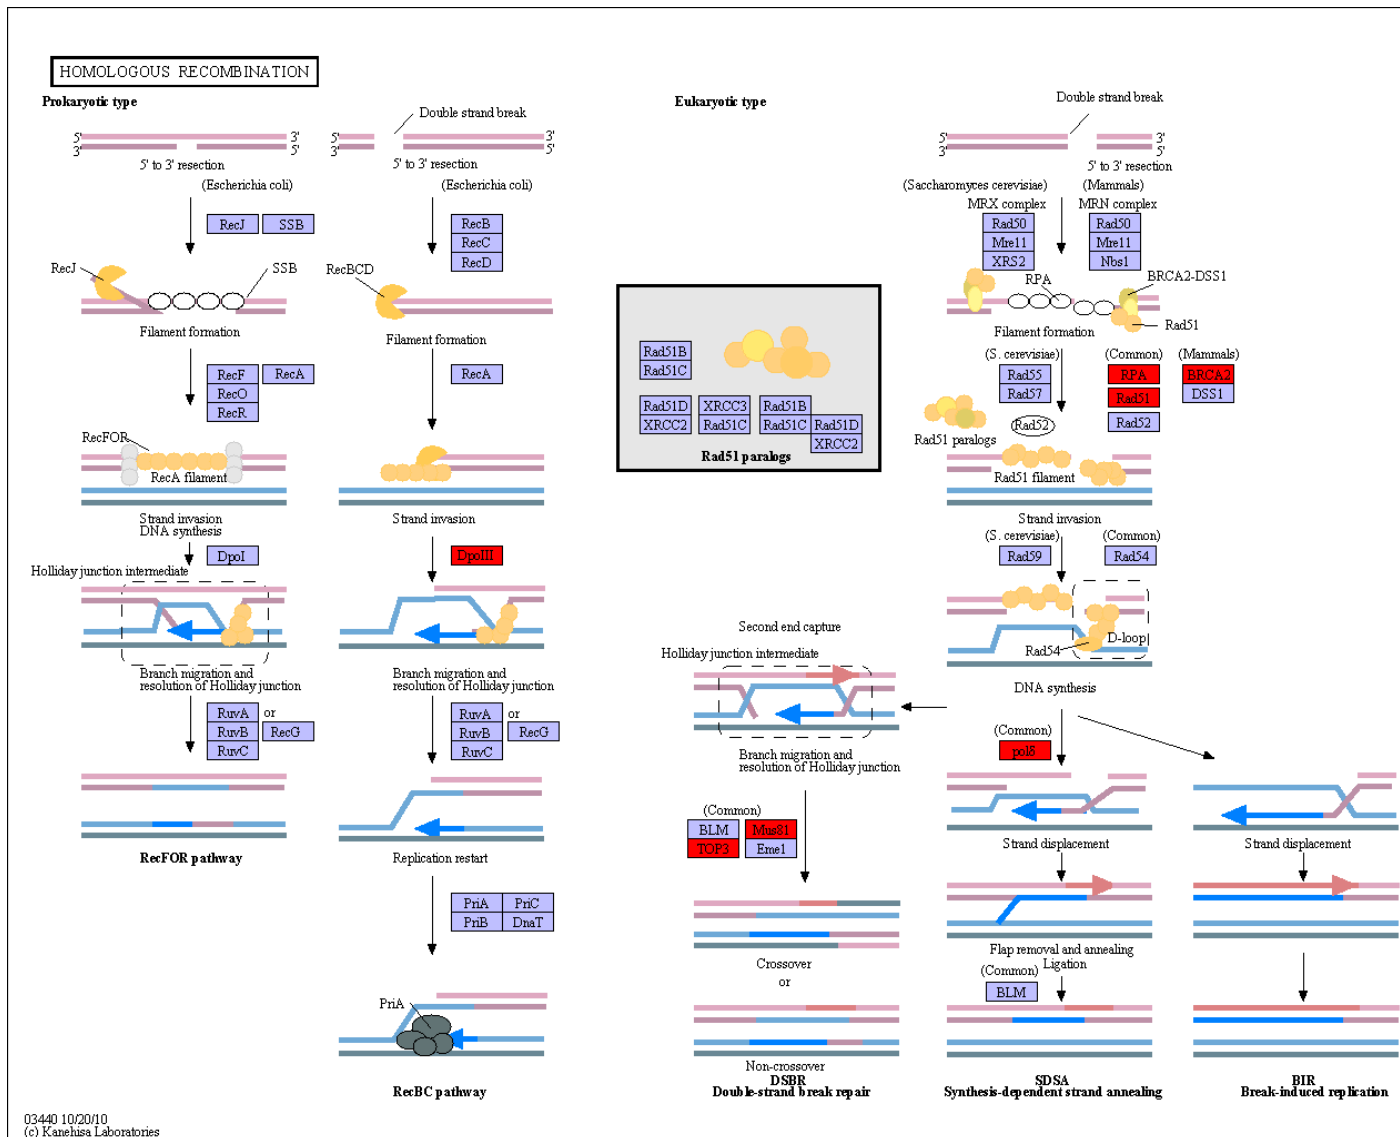

Figure 155: ko03440 Homologous recombination



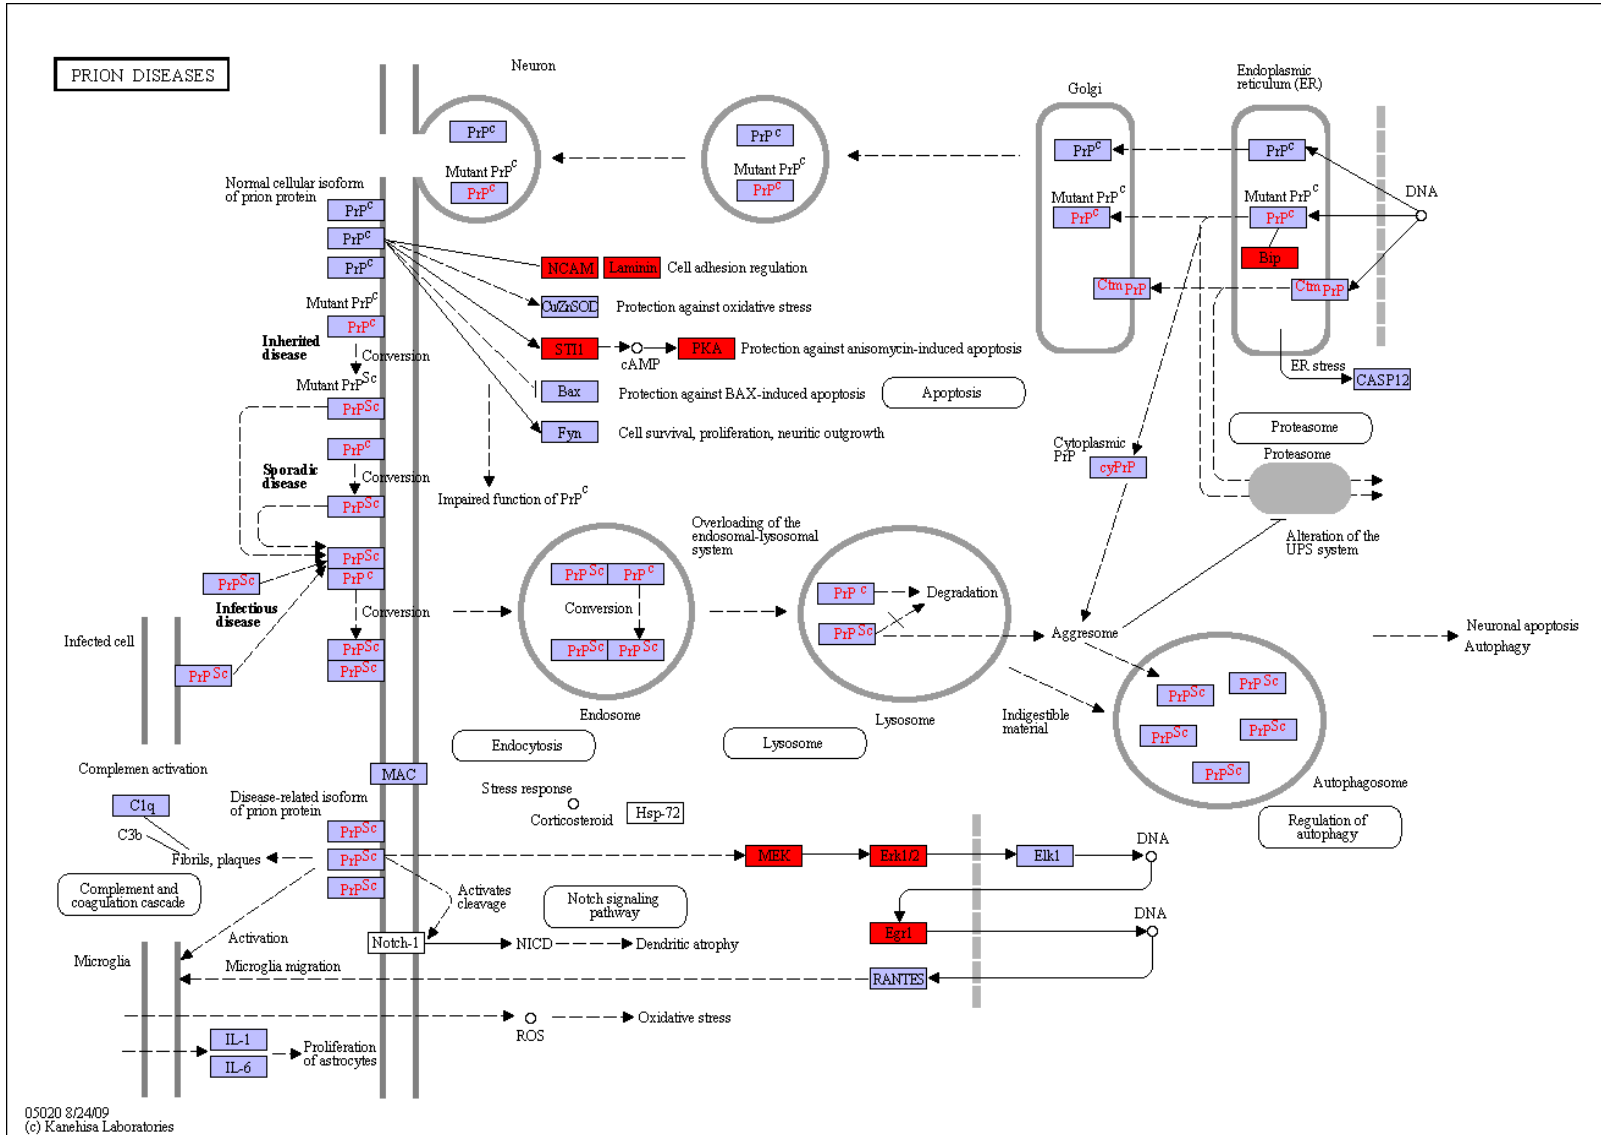

Figure 157: ko05020 Prion diseases



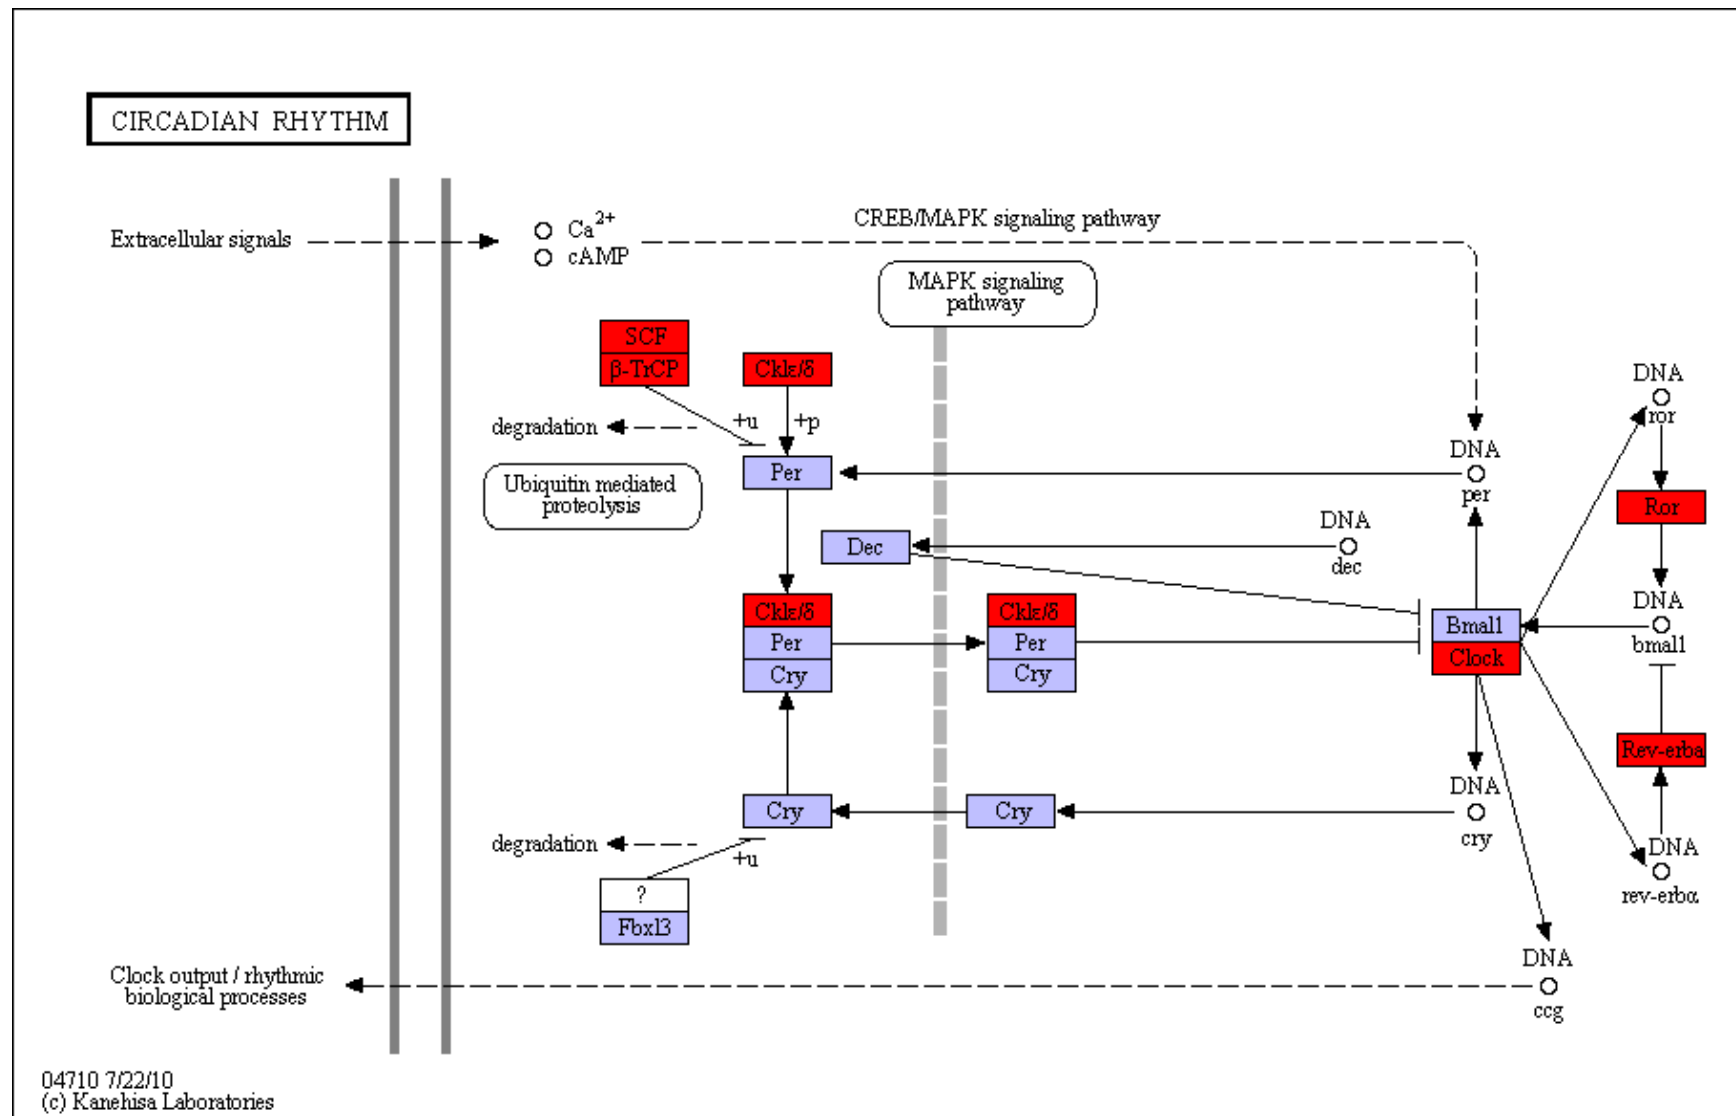

Figure 159: ko04710 Circadian rhythm - mammal



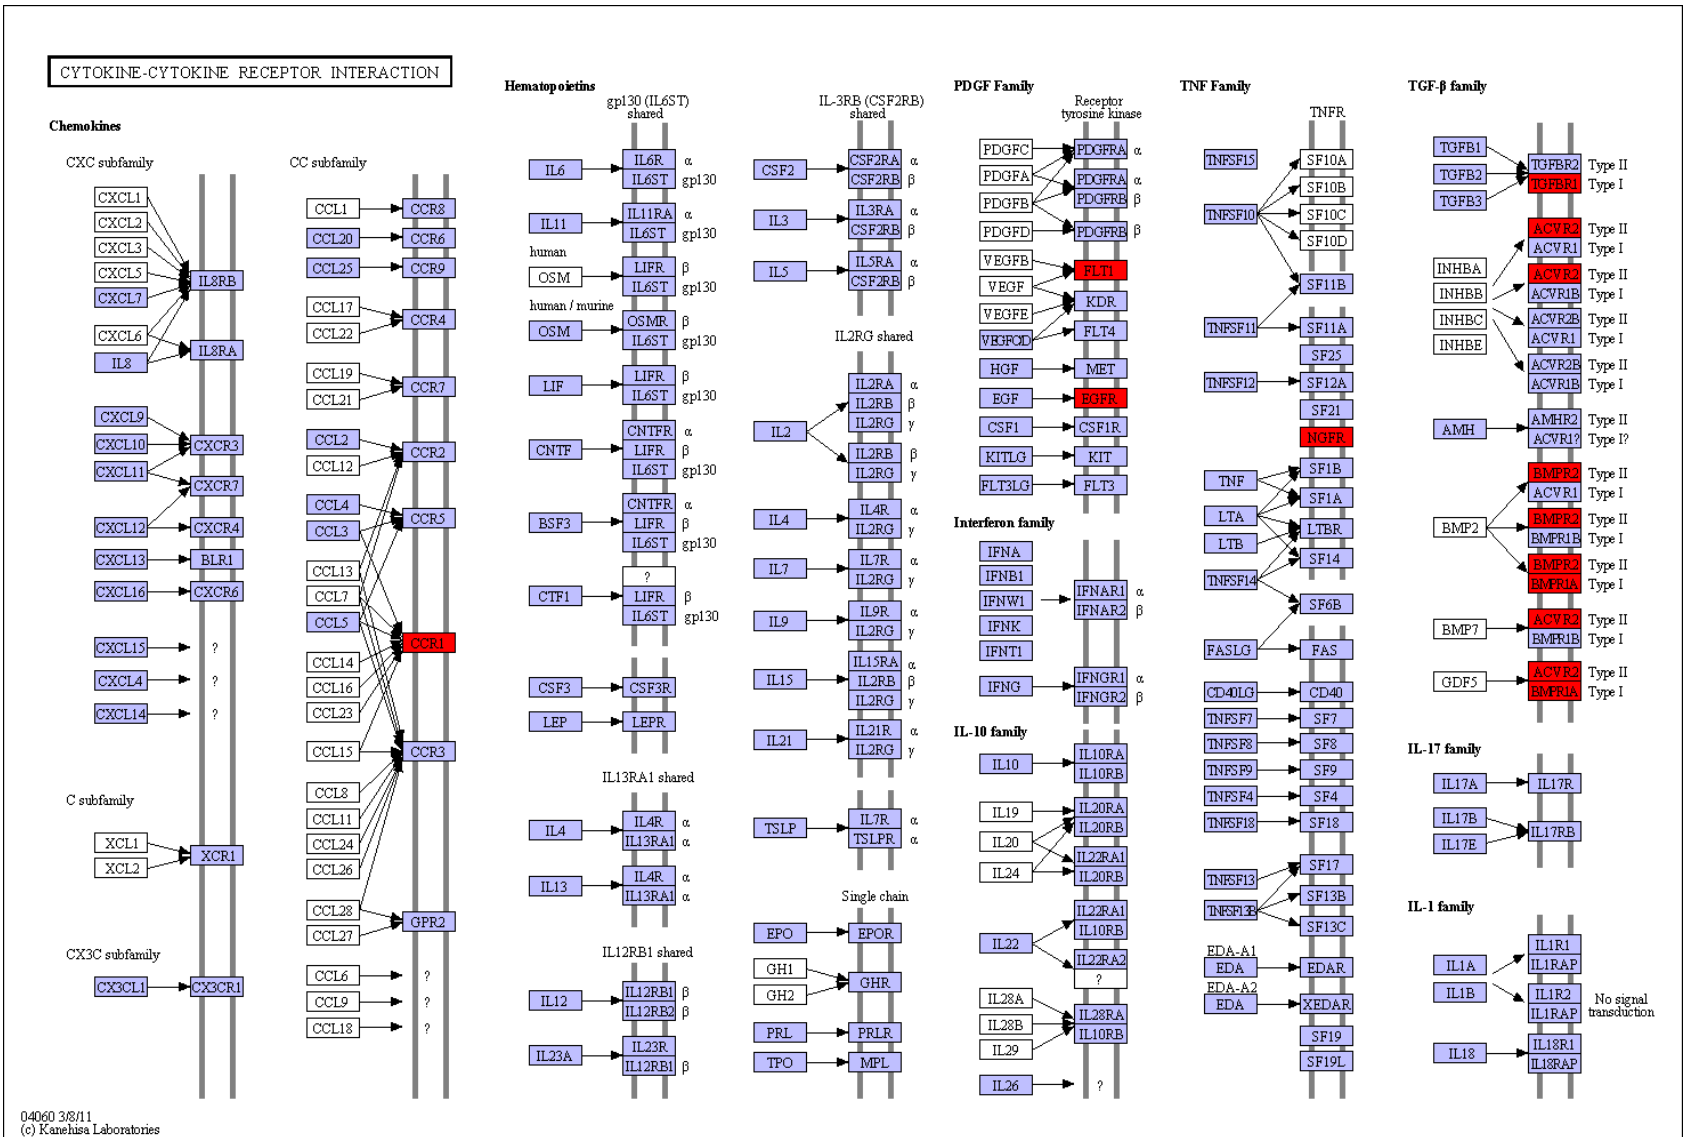

Figure 160: ko04060 Cytokine-cytokine receptor interaction

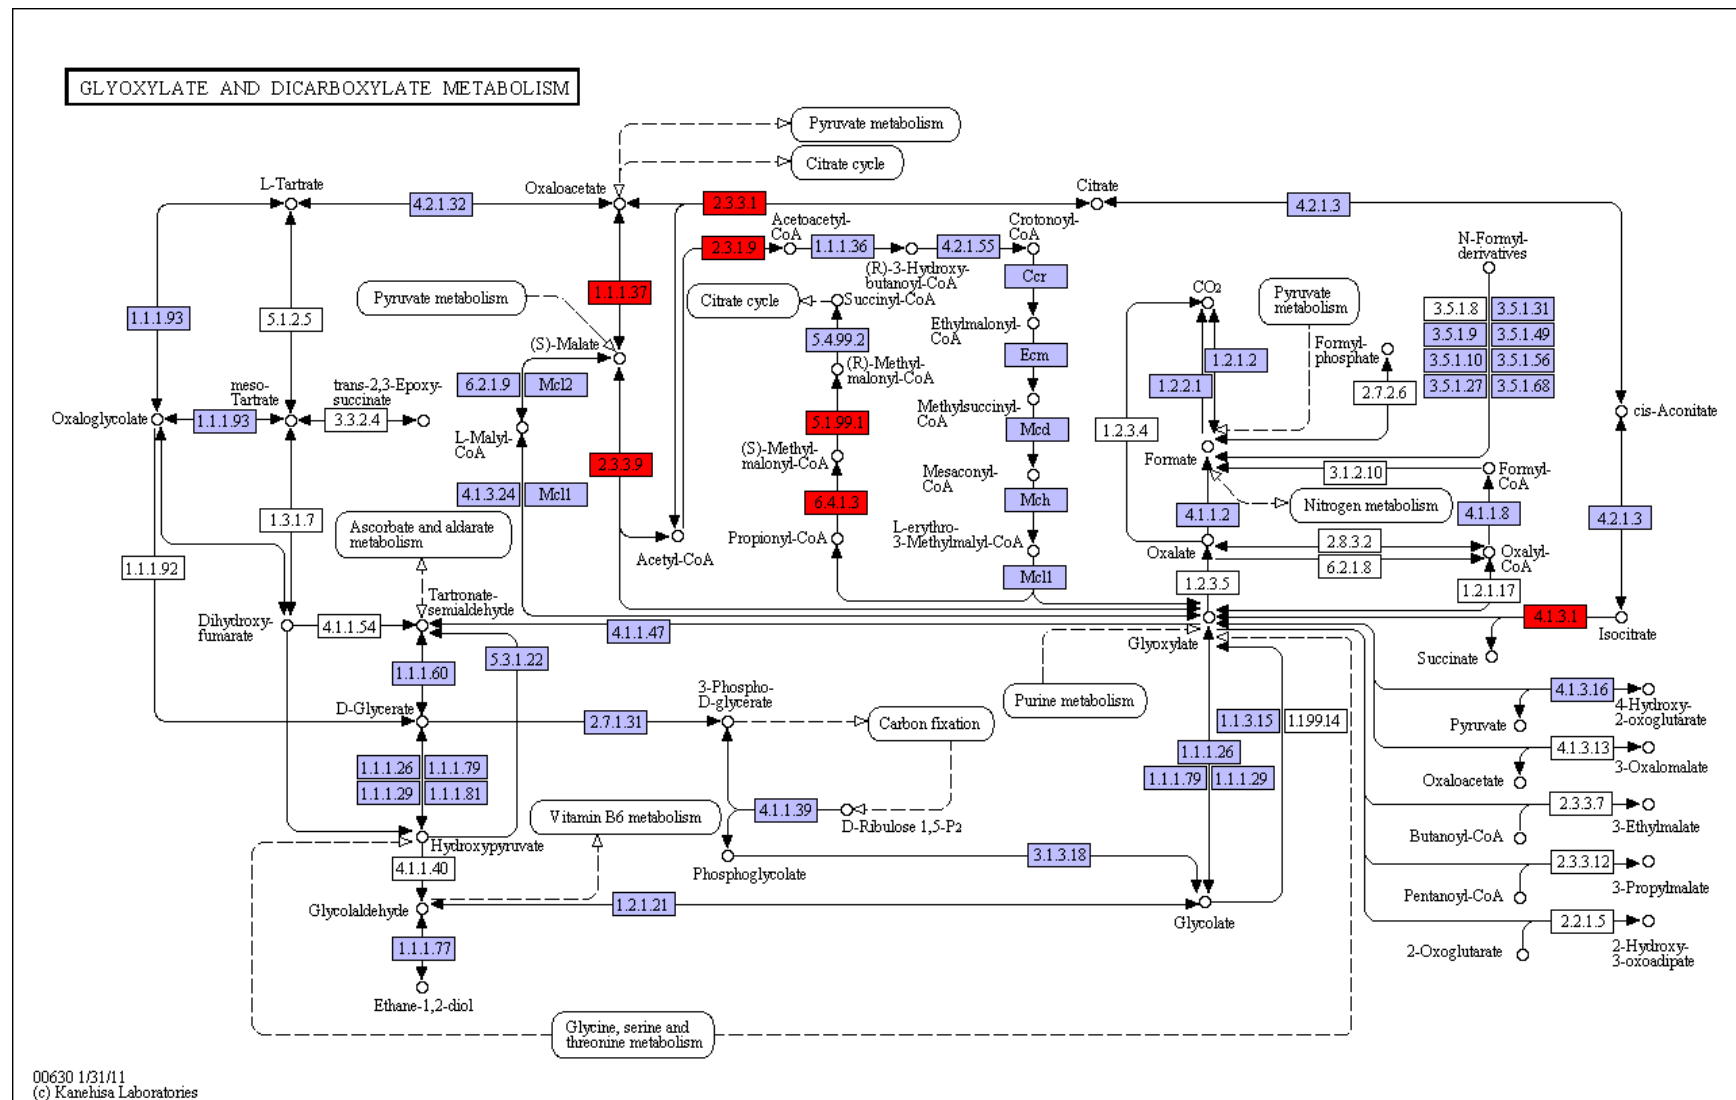

Figure 161: ko00630 Glyoxylate and dicarboxylate metabolism



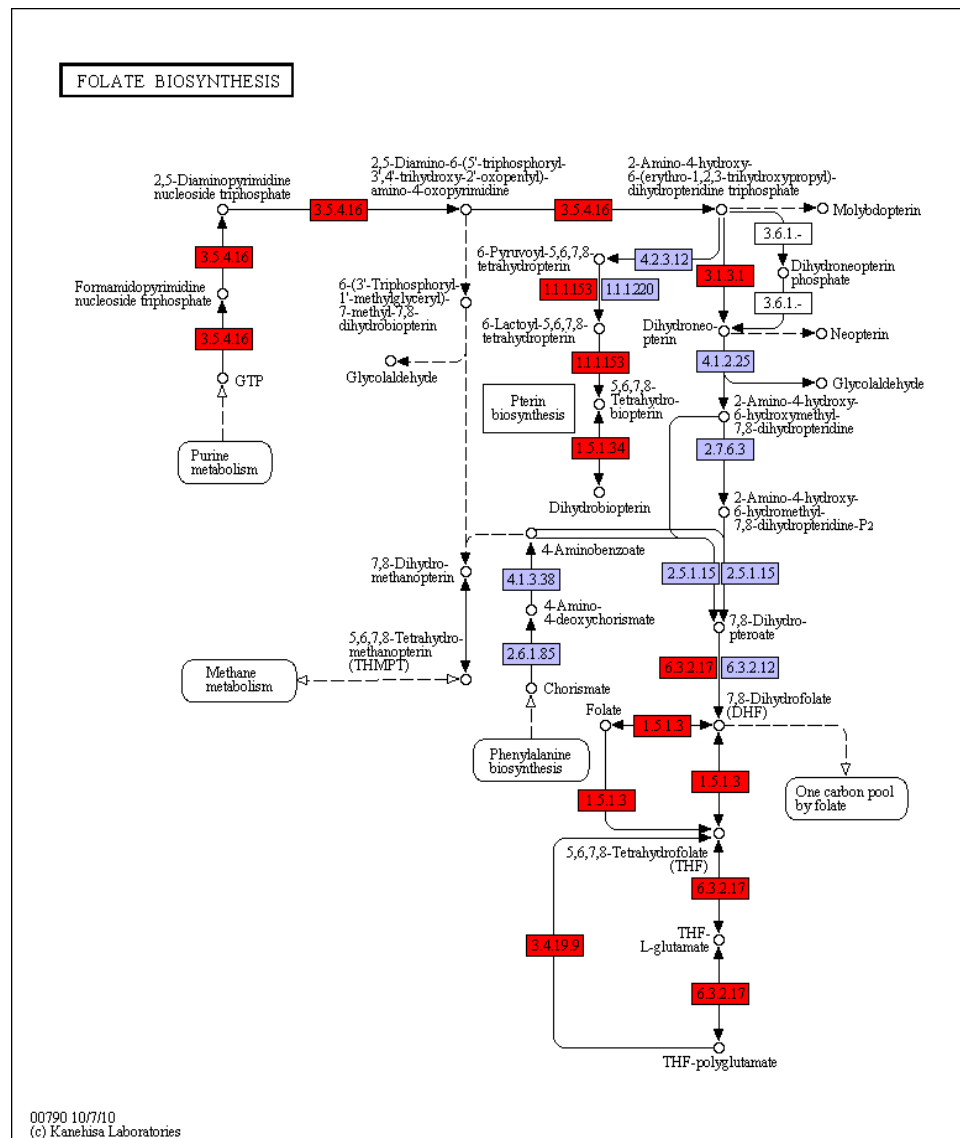

Figure 163: ko00790 Folate biosynthesis

OTHER TYPES OF O-GLYCAN BIOSYNTHESIS

**O-linked GlcNAc type**

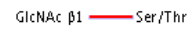

**O-linked Man type**

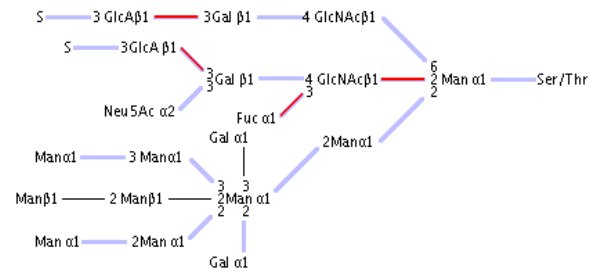

**O-linked Fuc type**

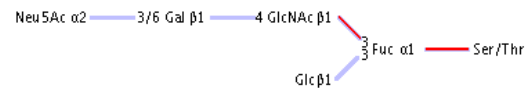

**O-linked Glc type**

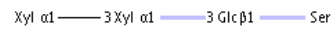

**O-linked Gal type**

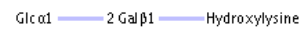

005141/24/11  
 (c) Kanehisa Laboratories

Figure 164: ko00514 Other types of O-glycan biosynthesis

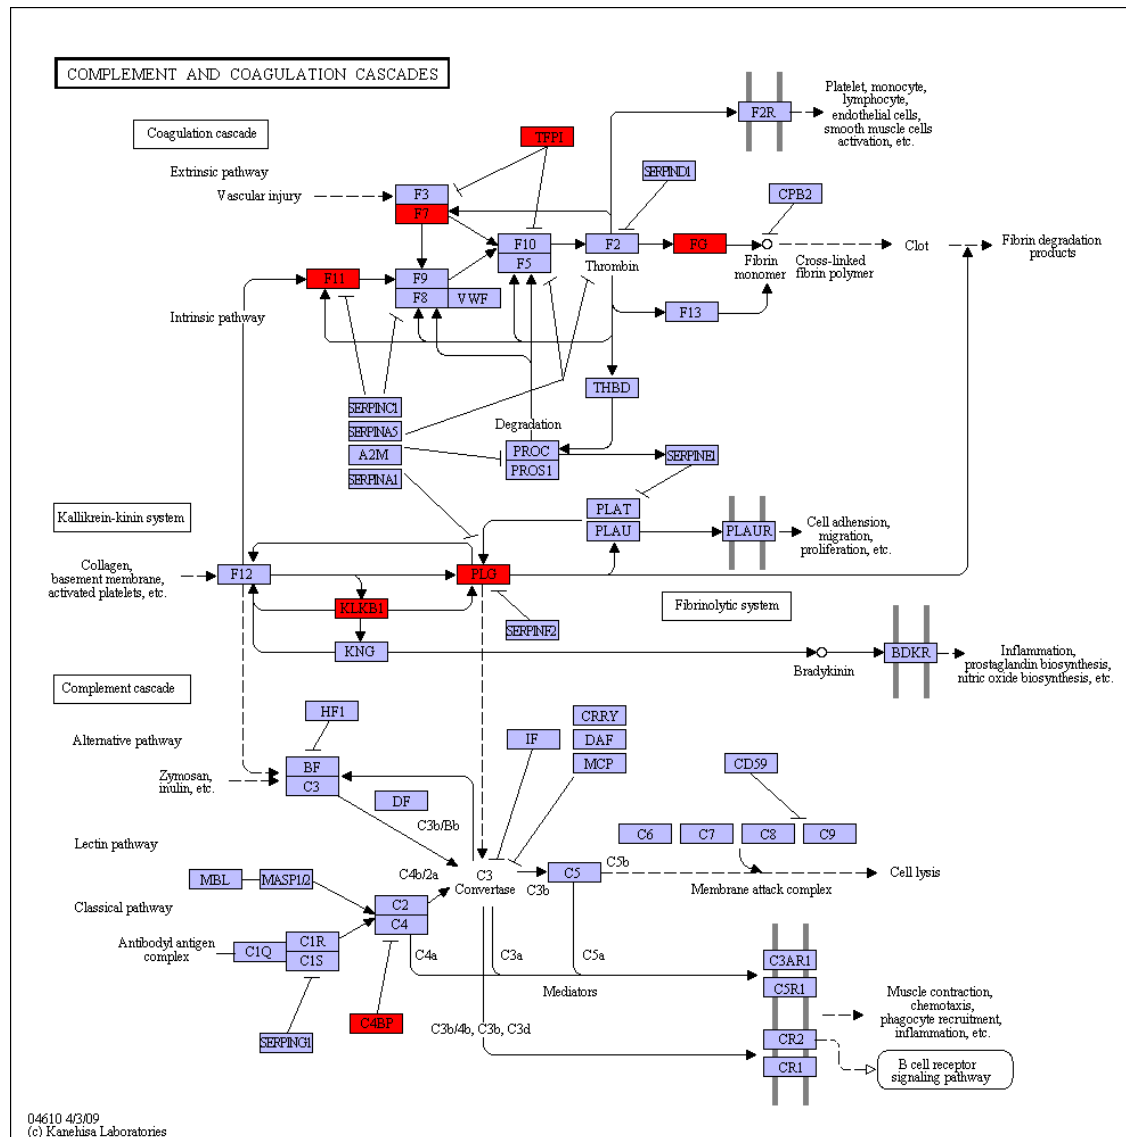

Figure 165: ko04610 Complement and coagulation cascades

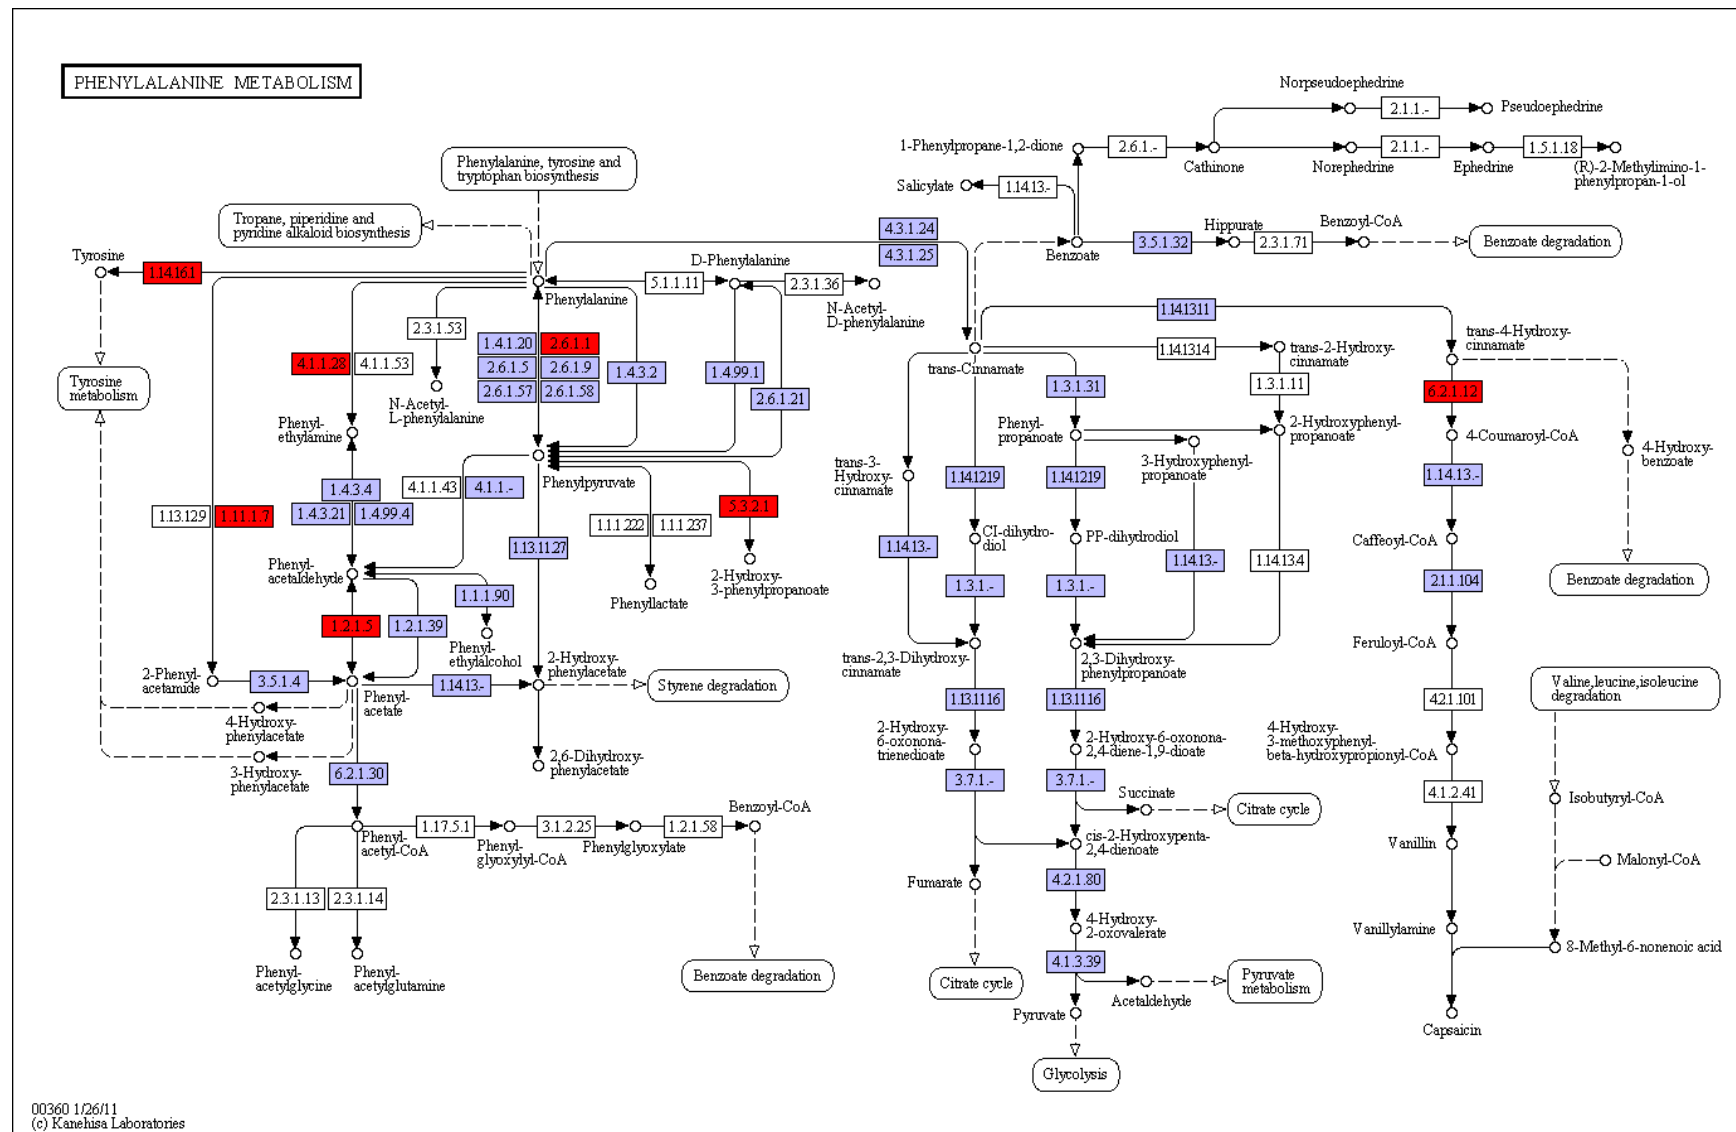

Figure 166: ko00360 Phenylalanine metabolism

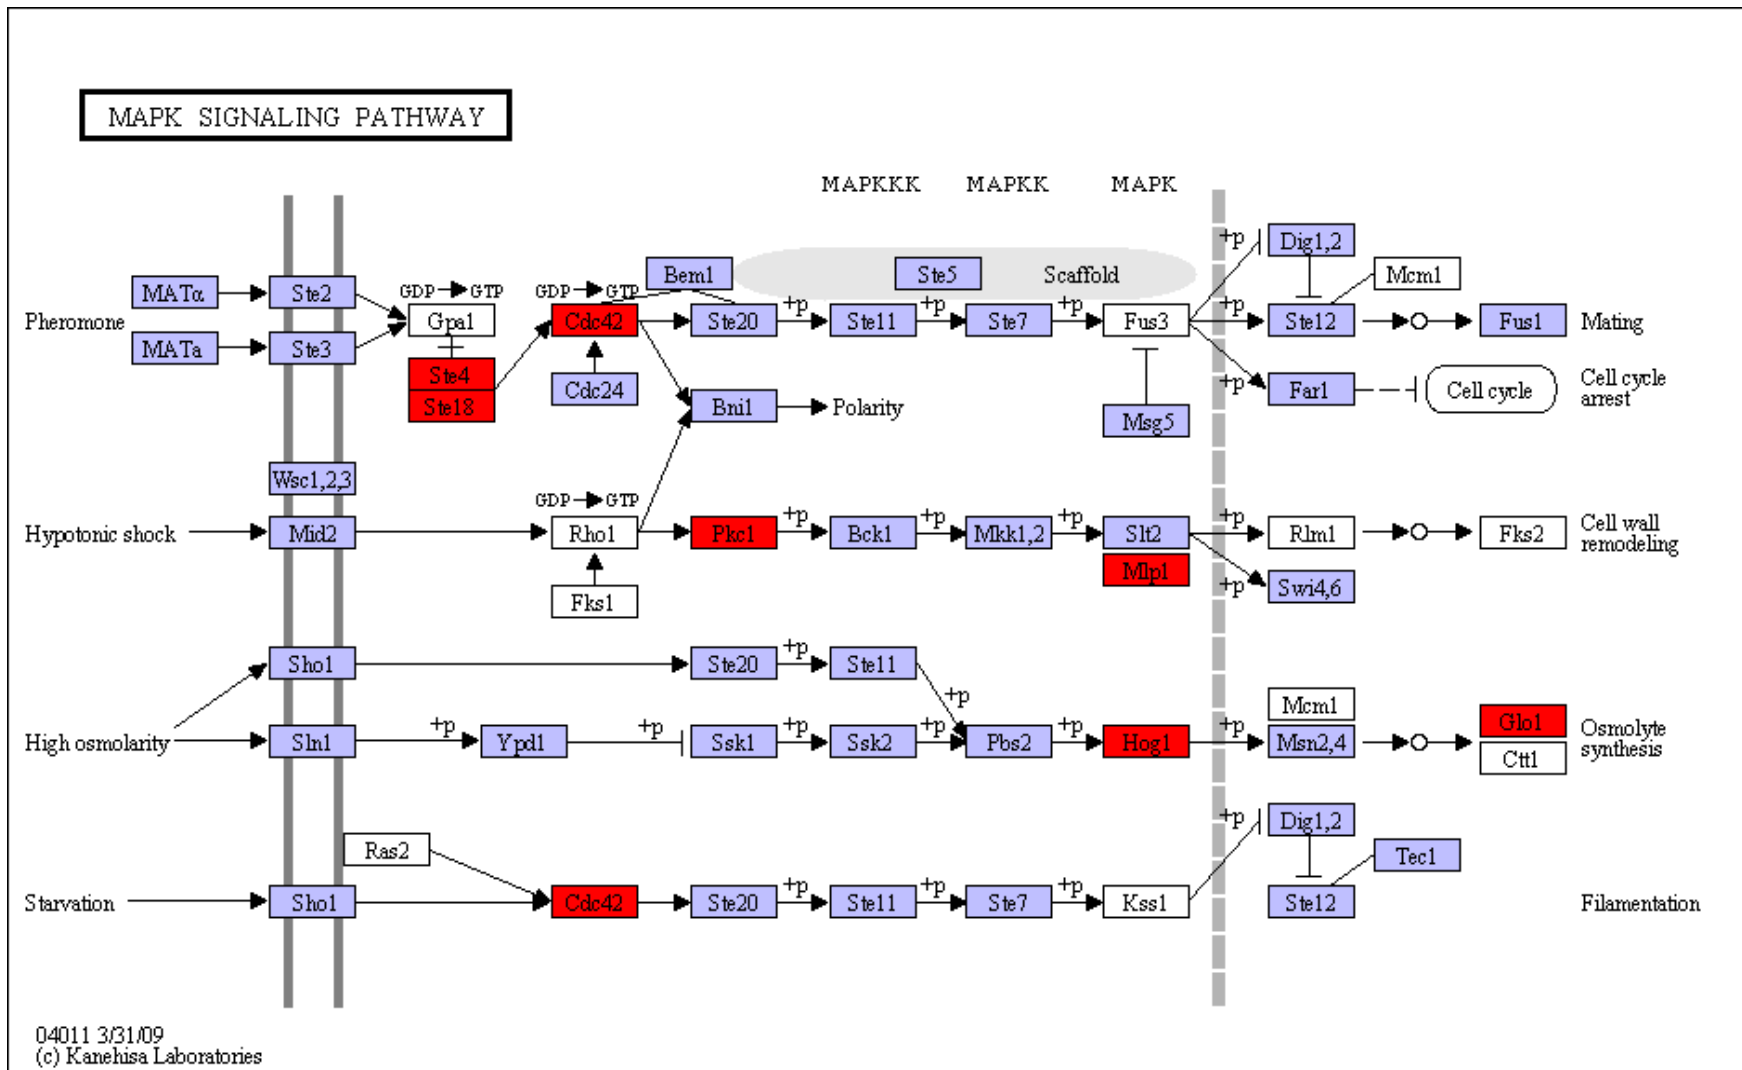

Figure 167: ko04011 MAPK signaling pathway - yeast



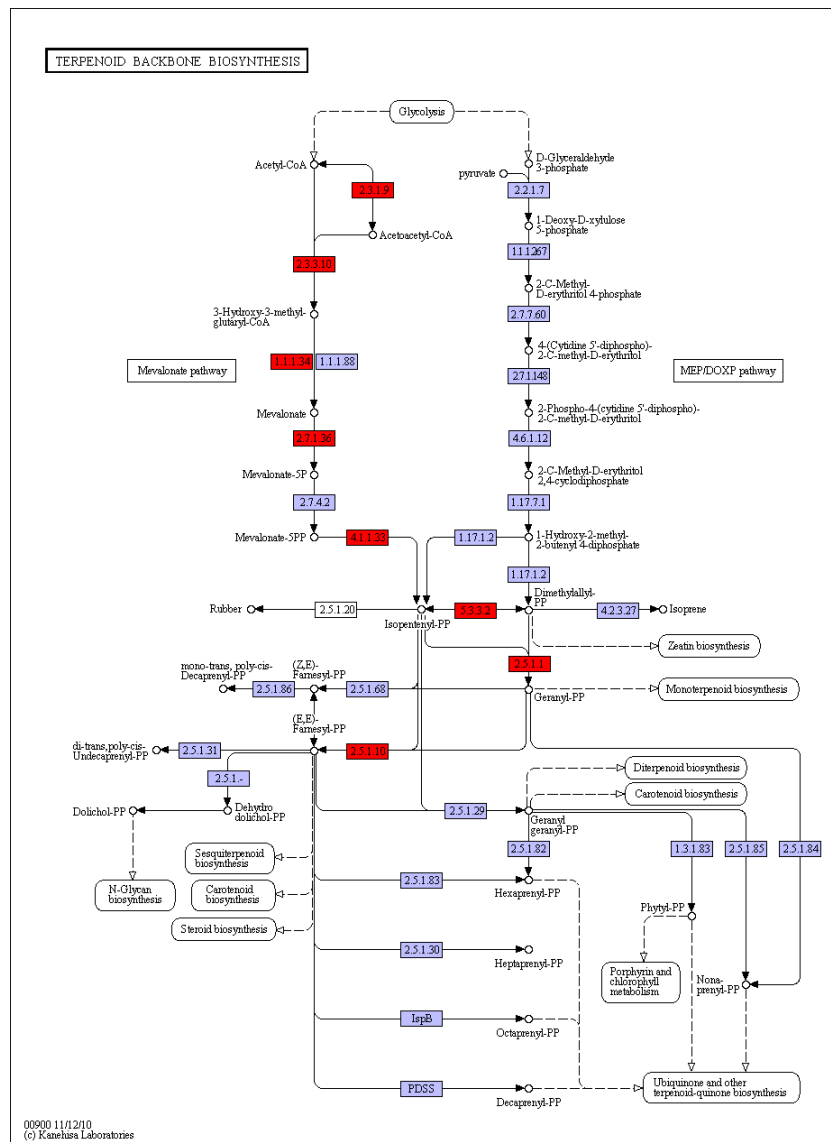

Figure 168: ko00900 Terpenoid backbone biosynthesis

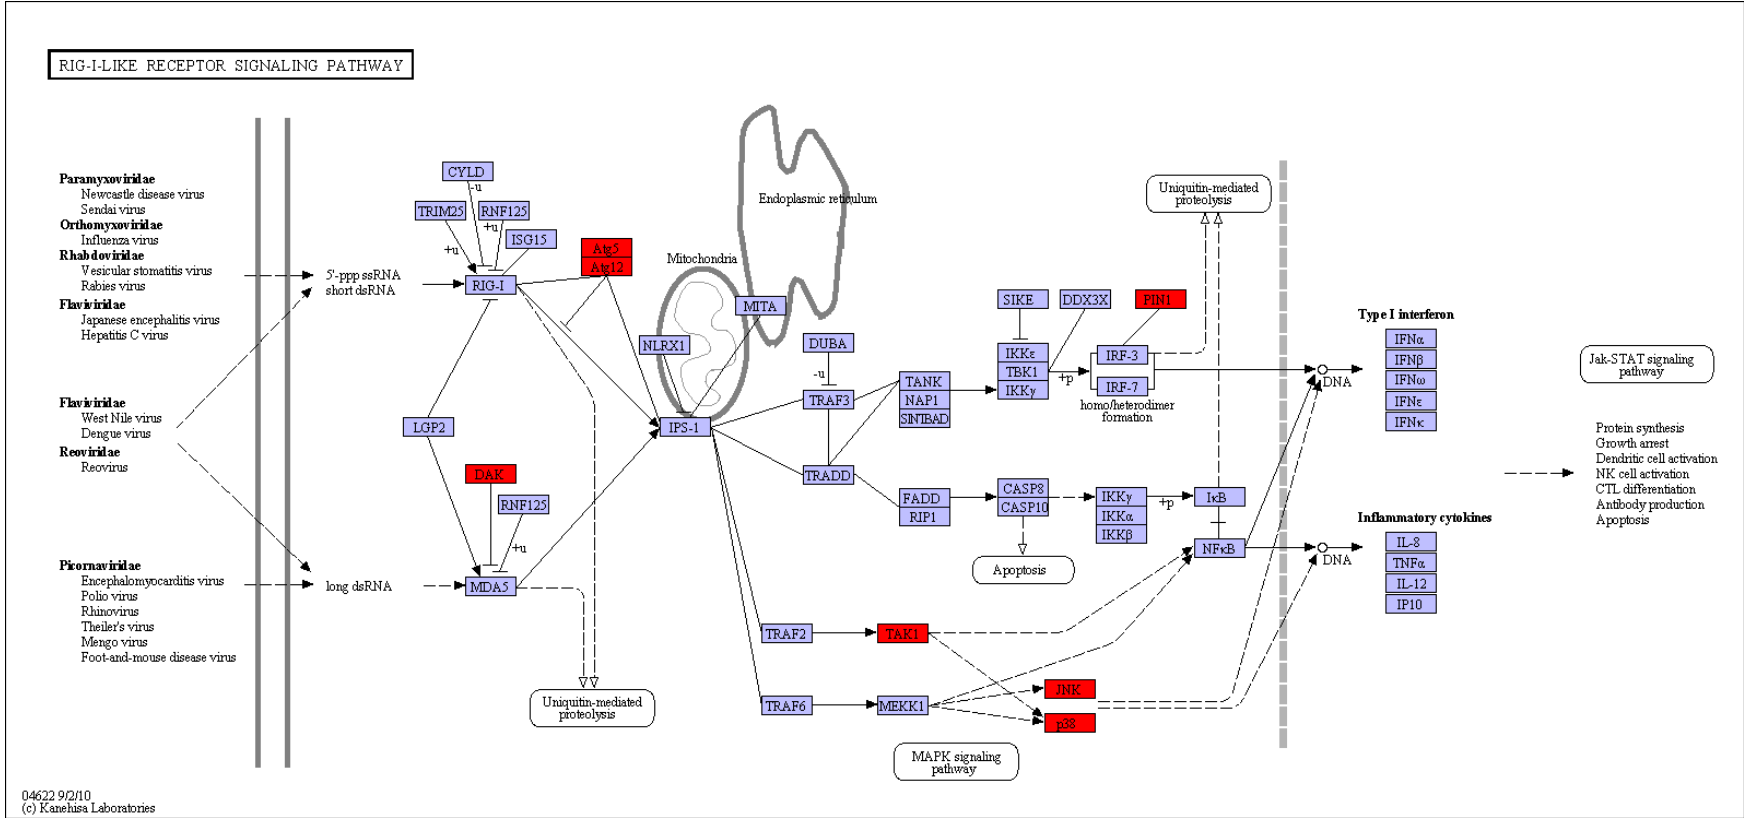

Figure 169: ko04622 RIG-I-like receptor signaling pathway

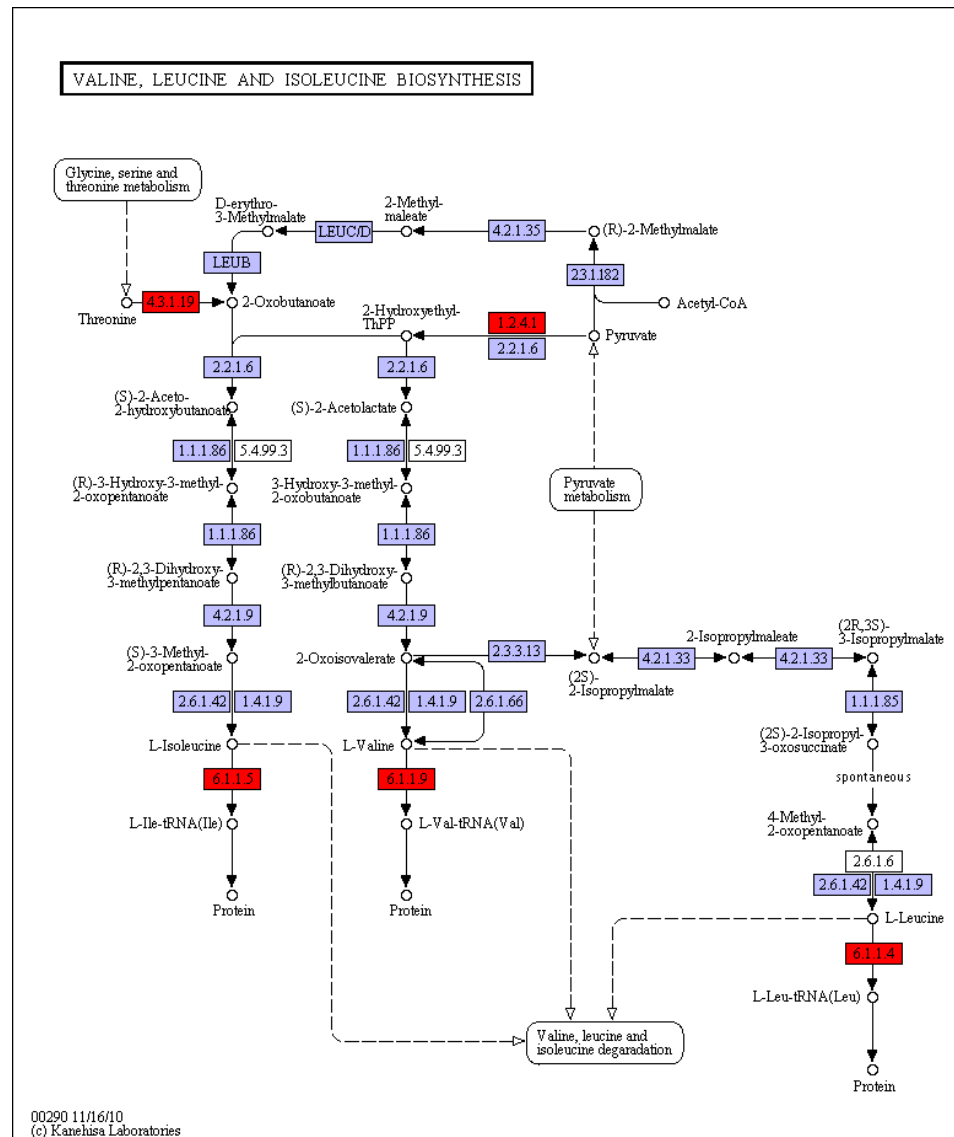

Figure 170: ko00290 Valine, leucine and isoleucine biosynthesis

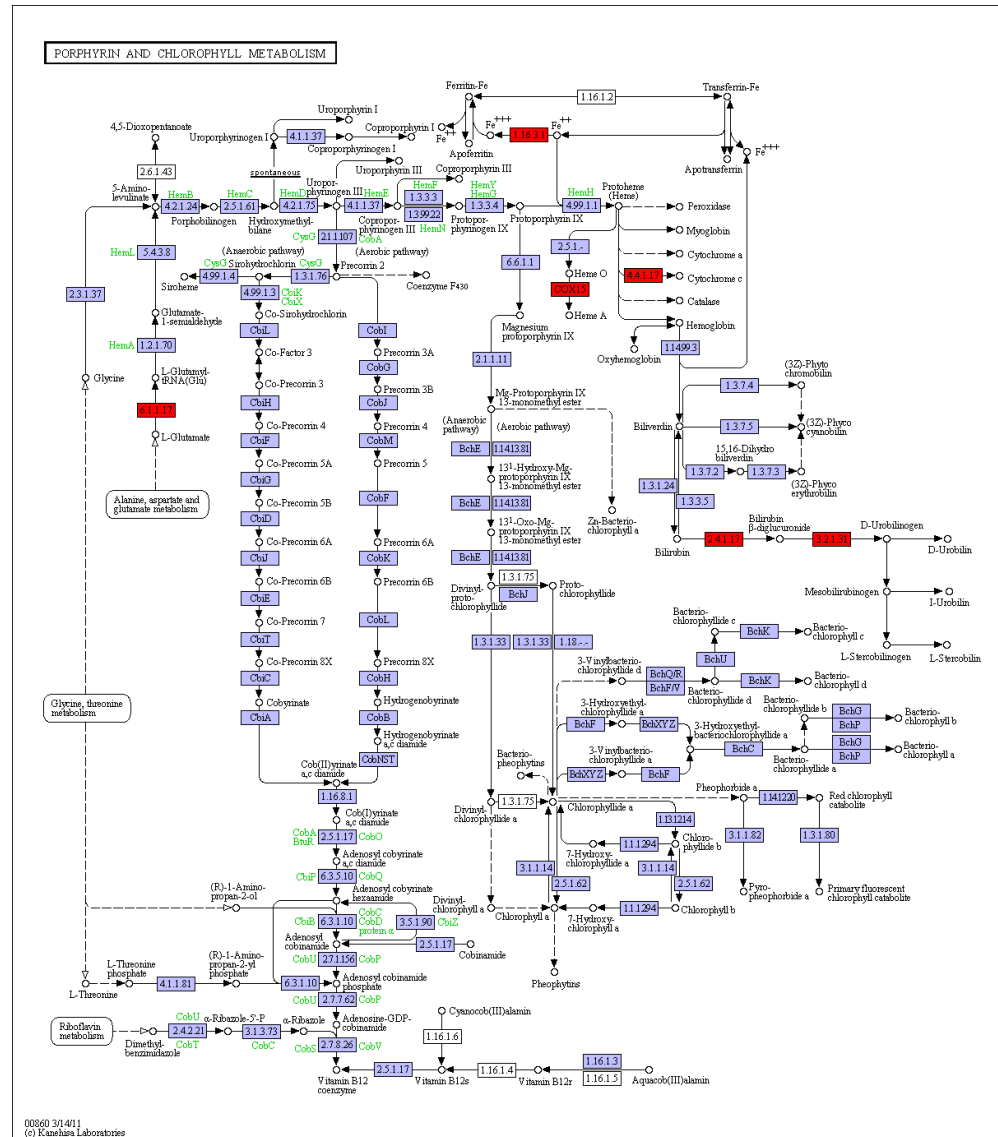

Figure 171: ko00860 Porphyrin and chlorophyll metabolism



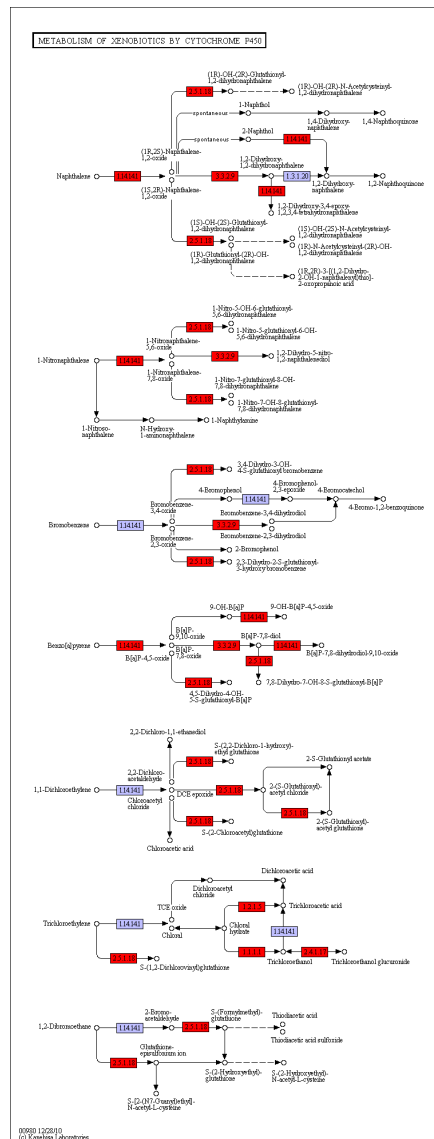

Figure 173: ko00980 Metabolism of xenobiotics by cytochrome P450



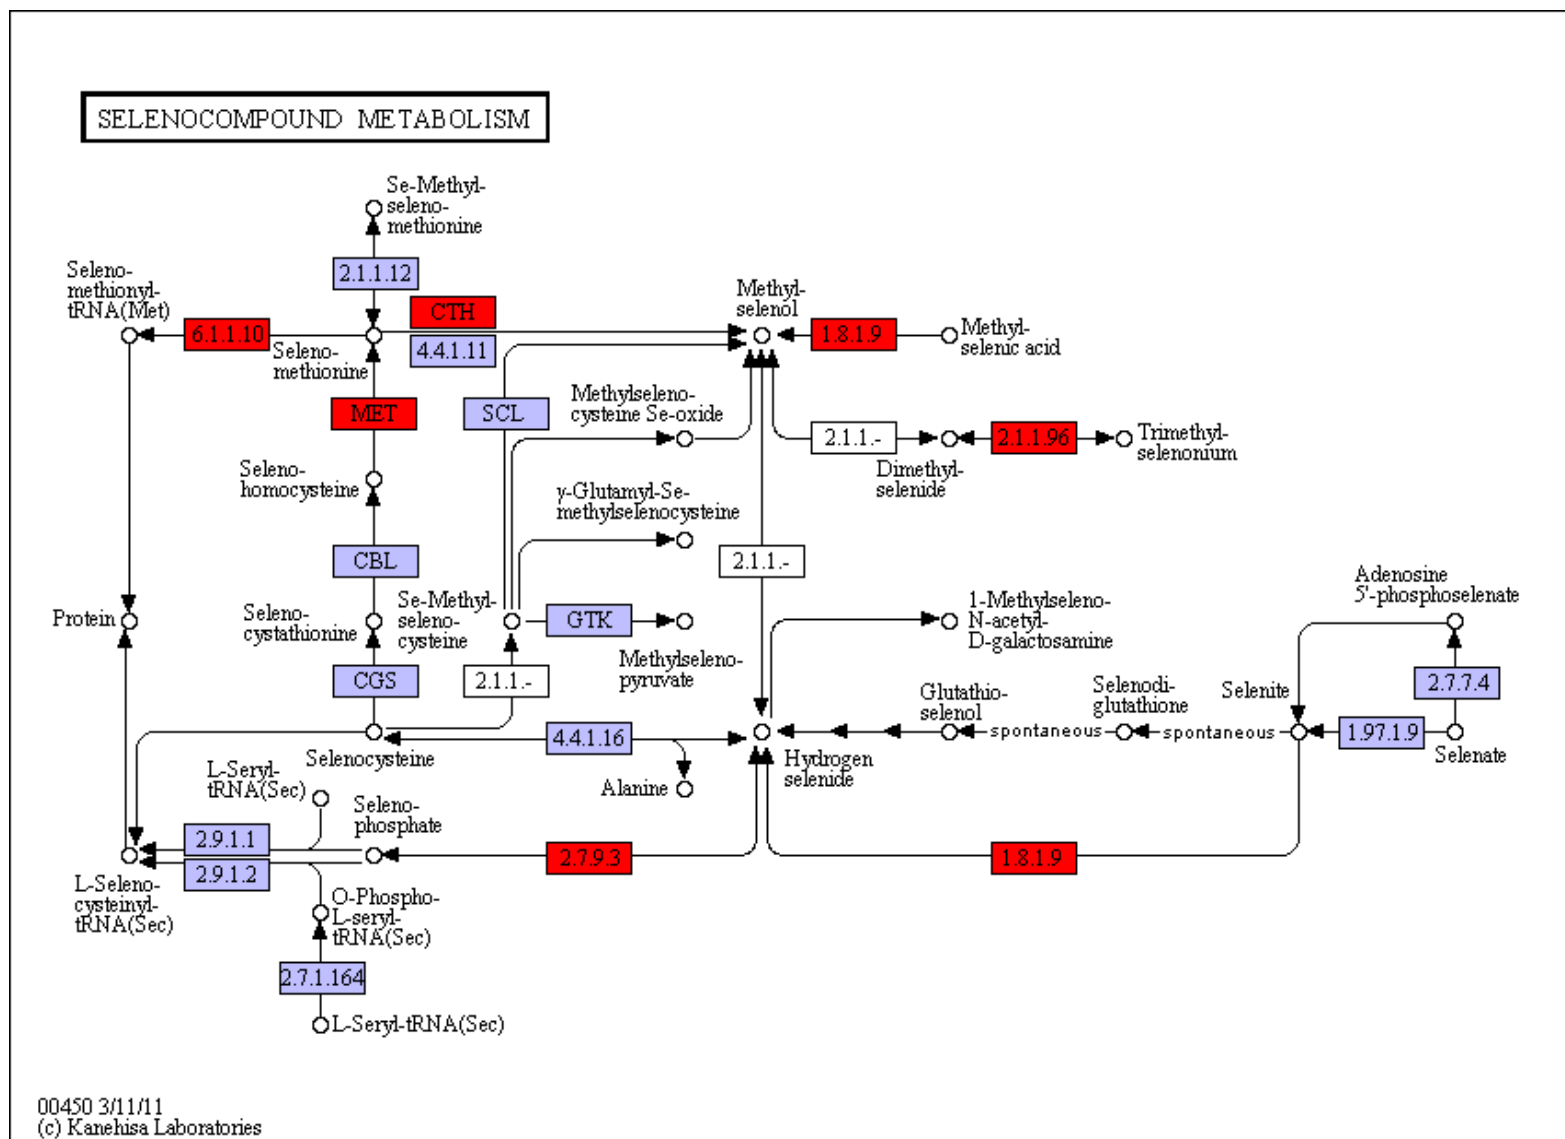

Figure 175: ko00450 Selenocompound metabolism



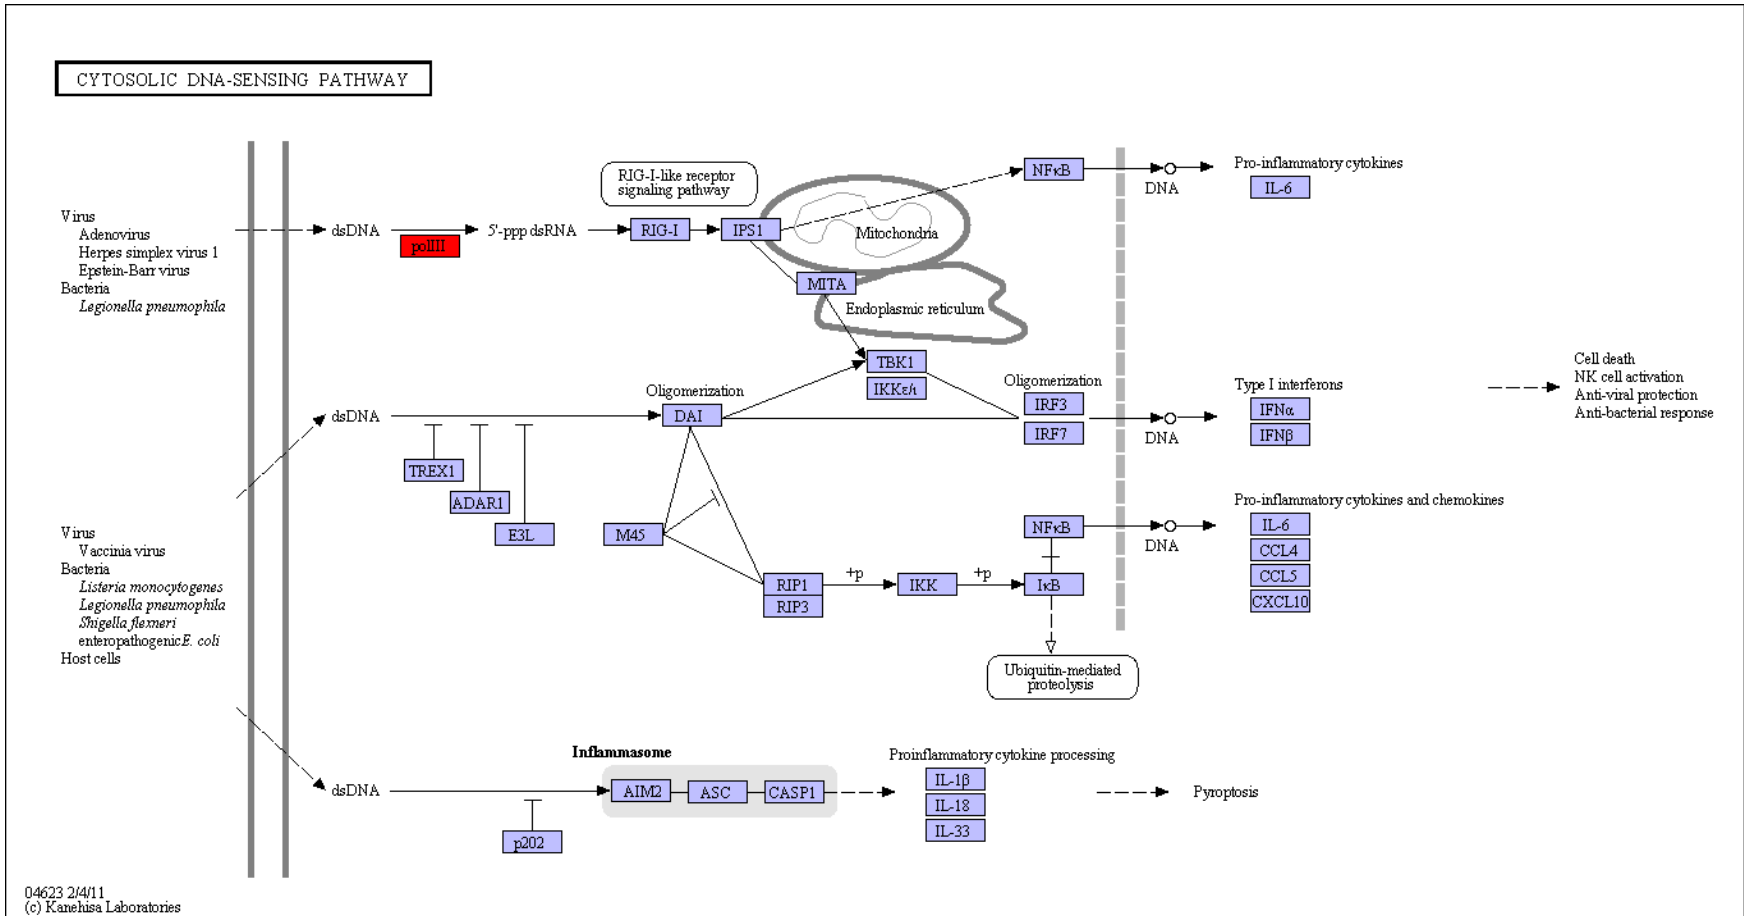

Figure 176: ko04623 Cytosolic DNA-sensing pathway

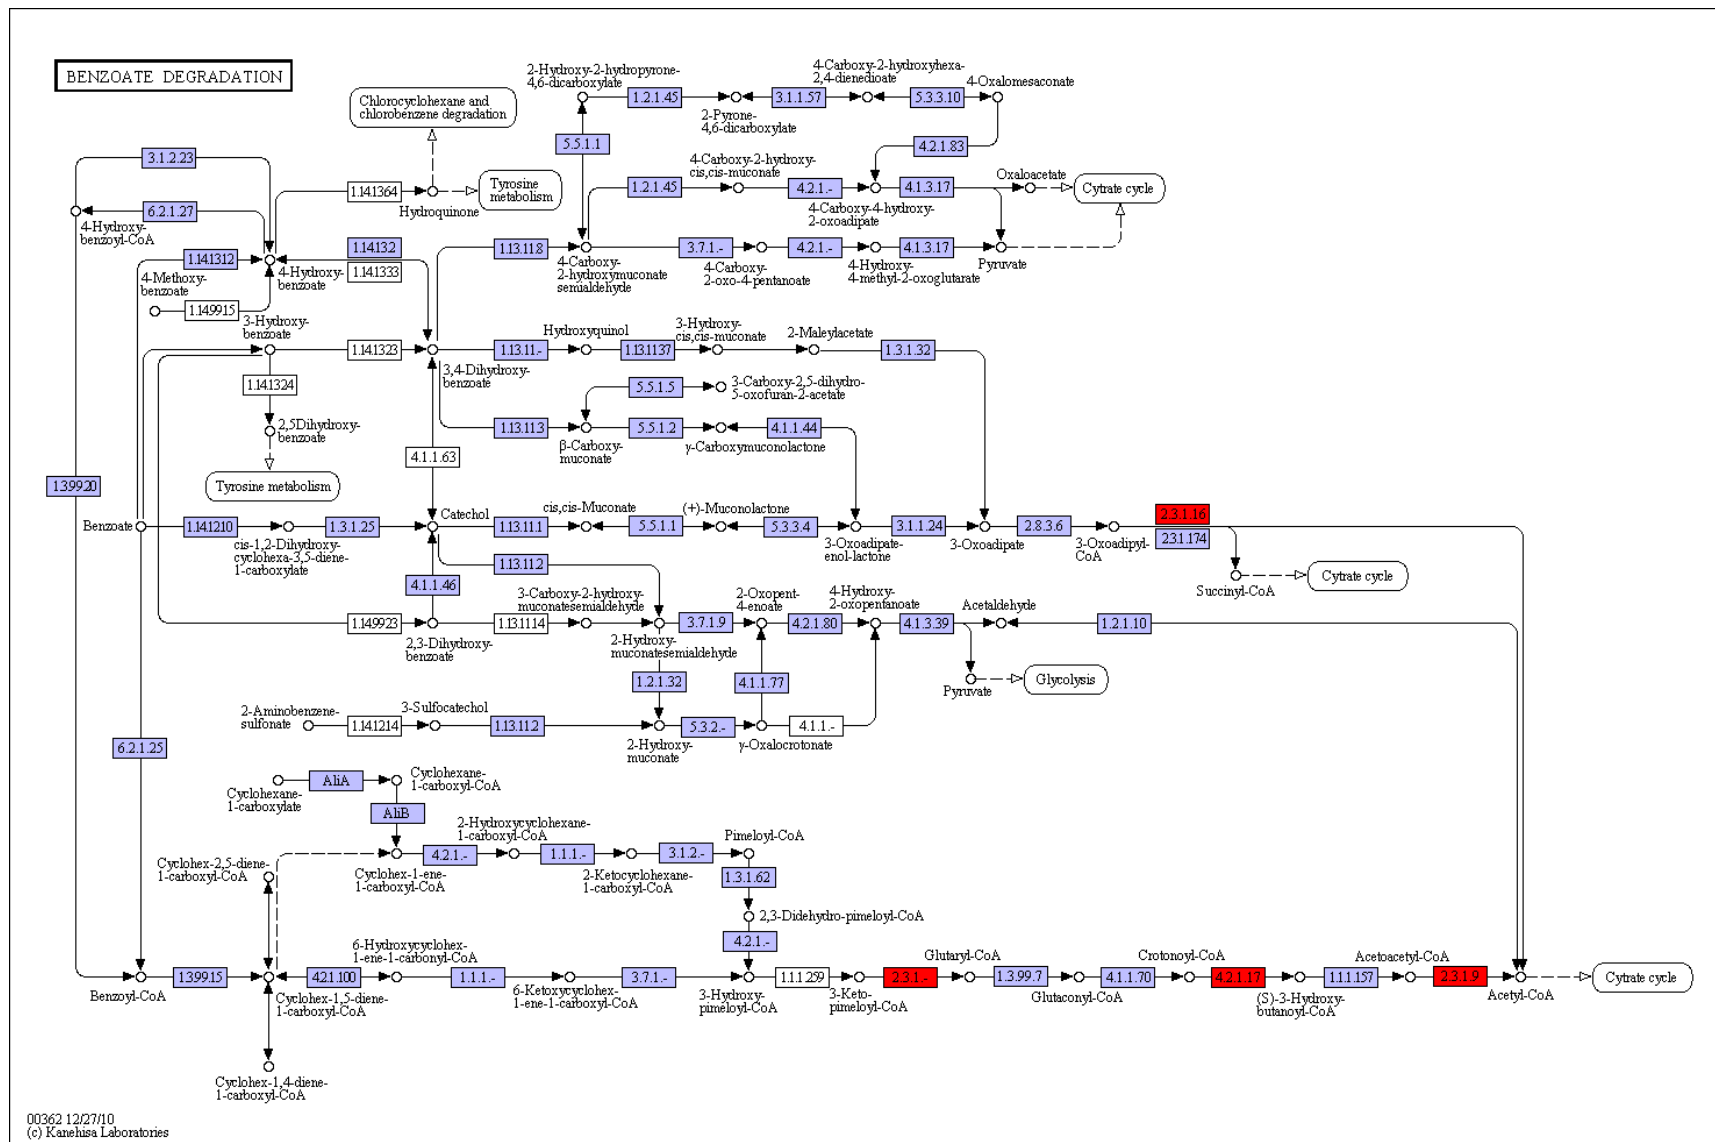

Figure 177: ko00362 Benzoate degradation

FATTY ACID ELONGATION IN MITOCHONDRIA

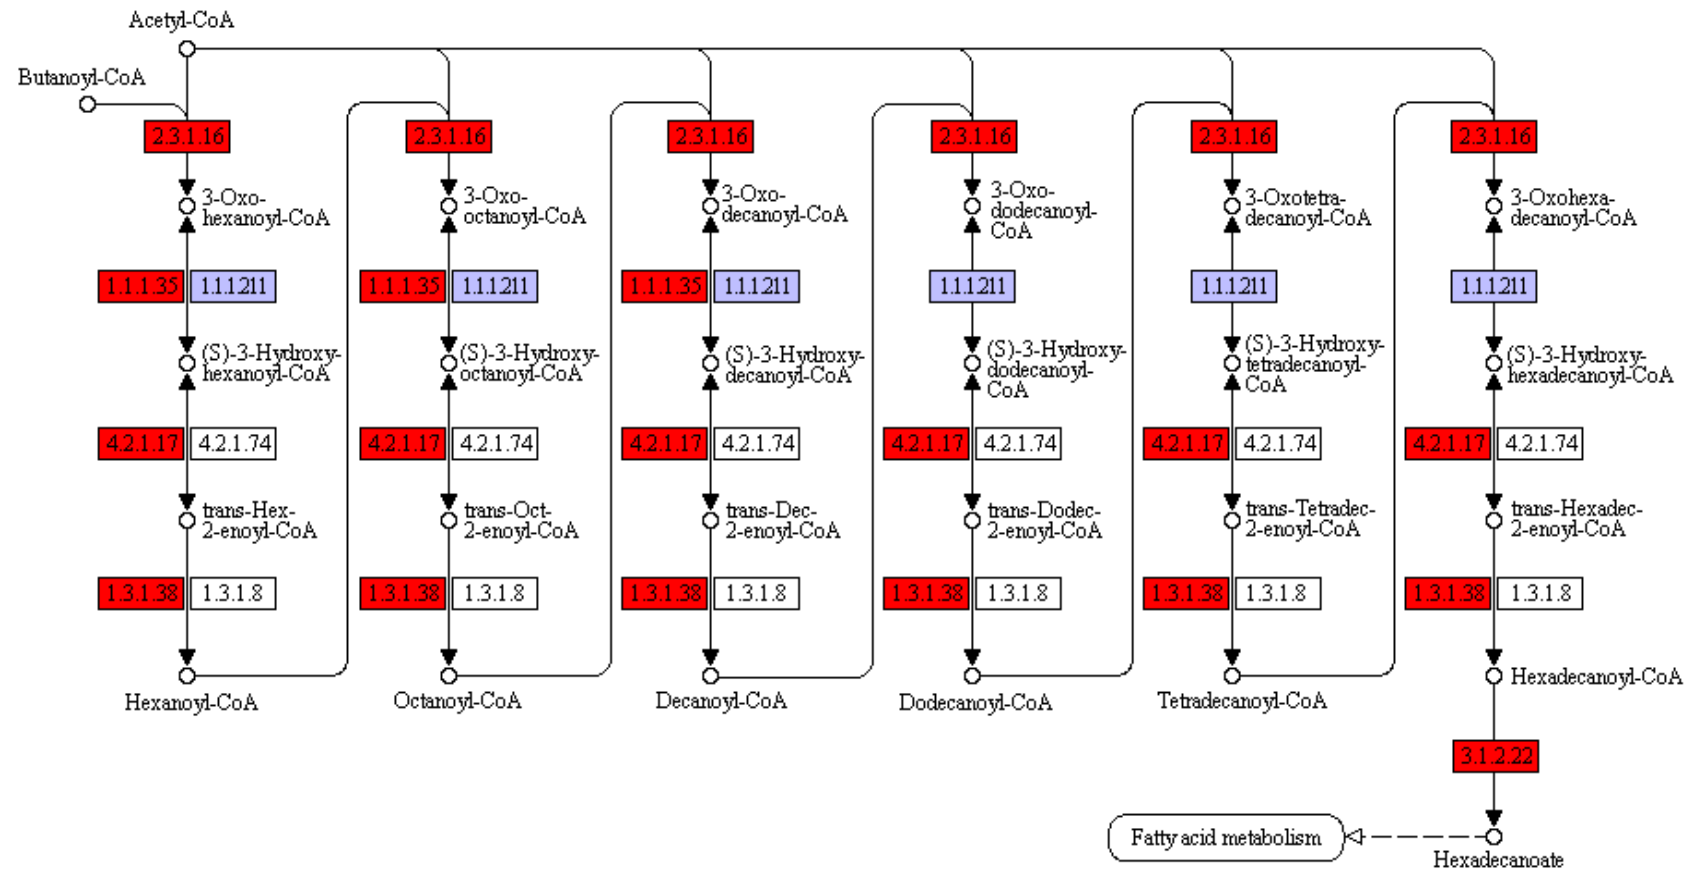

00062 2/22/10  
 (c) Kanehisa Laboratories

Figure 178: ko00062 Fatty acid elongation in mitochondria

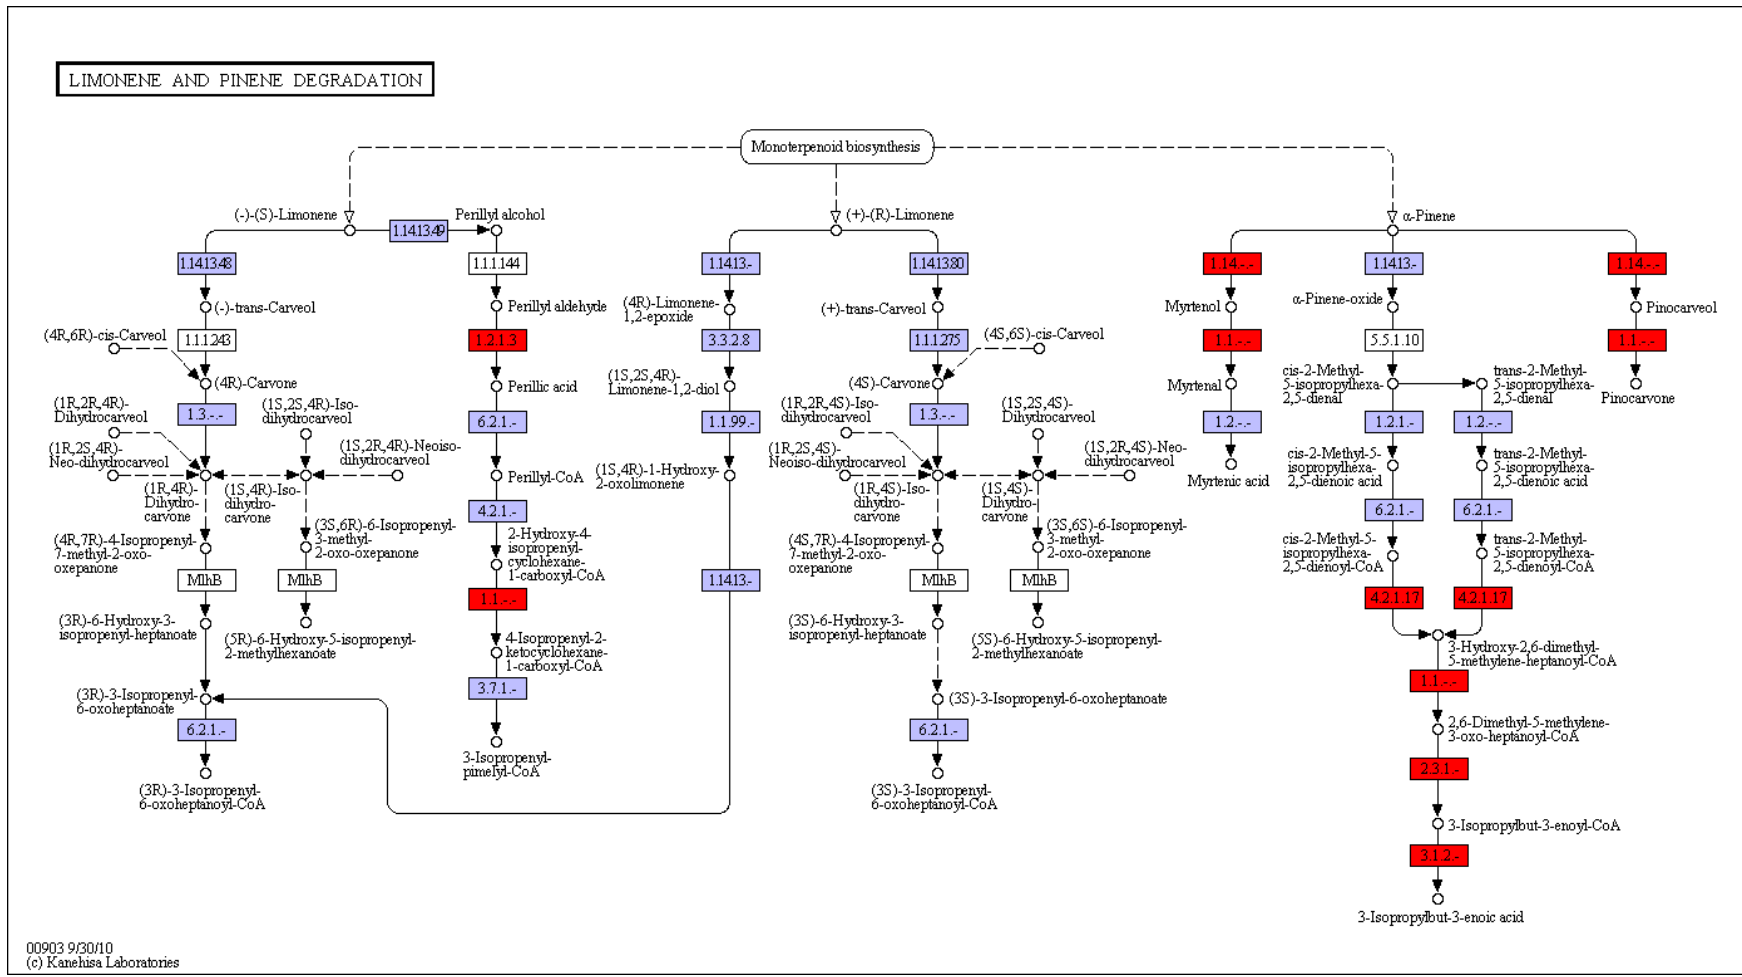

Figure 179: ko00903 Limonene and pinene degradation

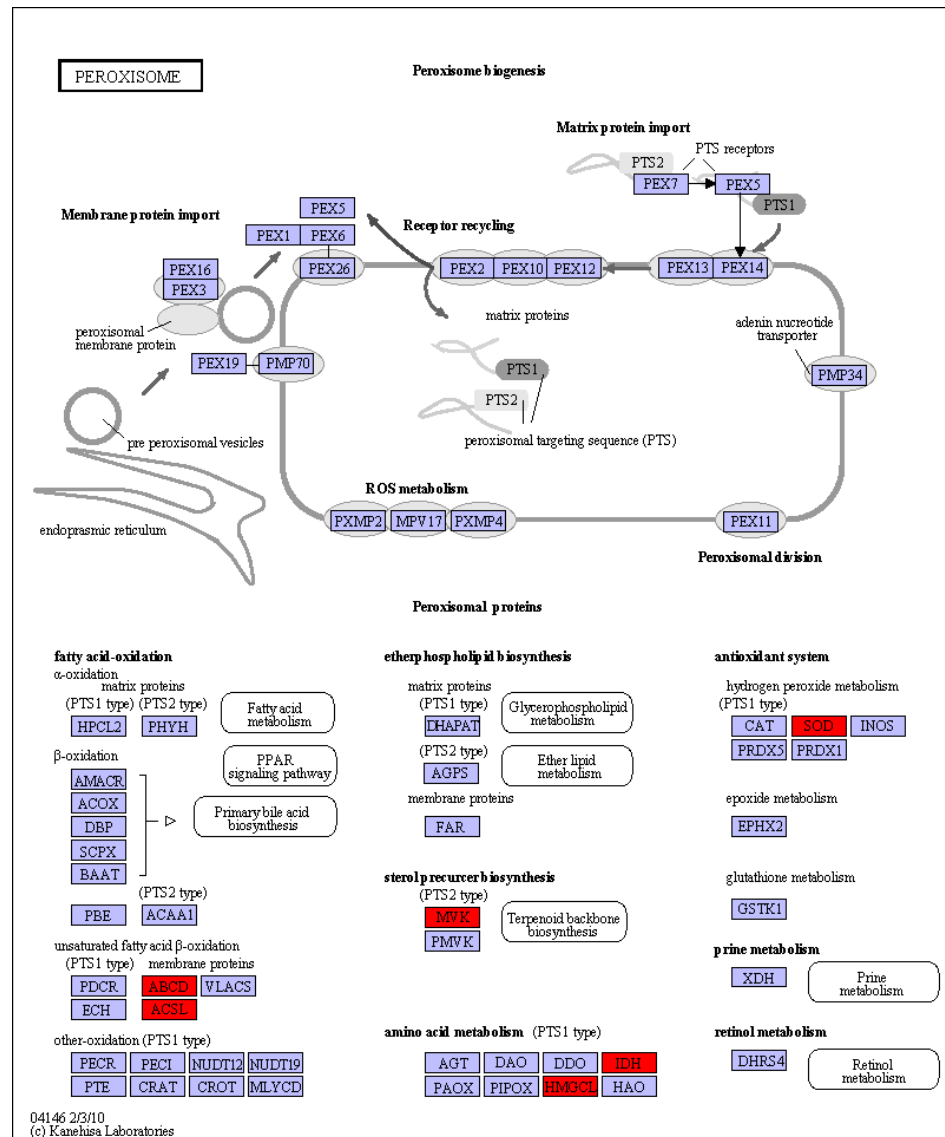

Figure 180: ko04146 Peroxisome

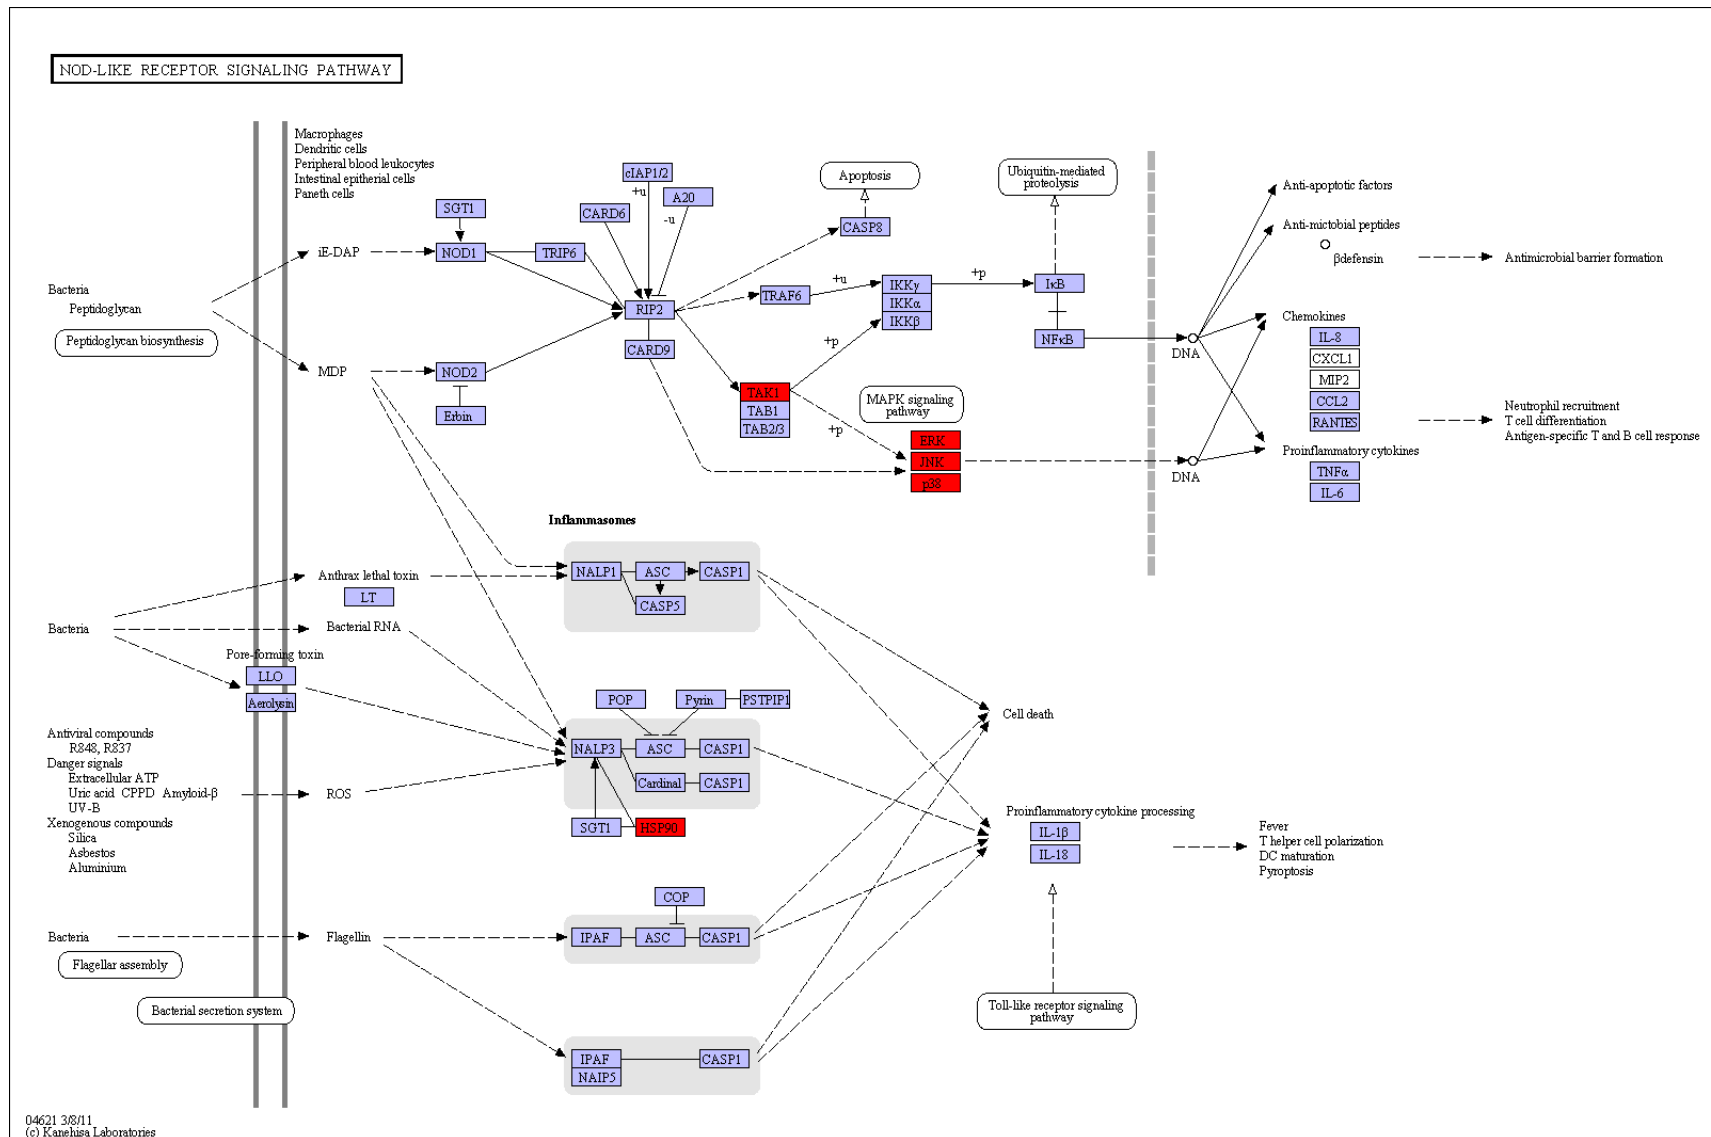

Figure 181: ko04621 NOD-like receptor signaling pathway

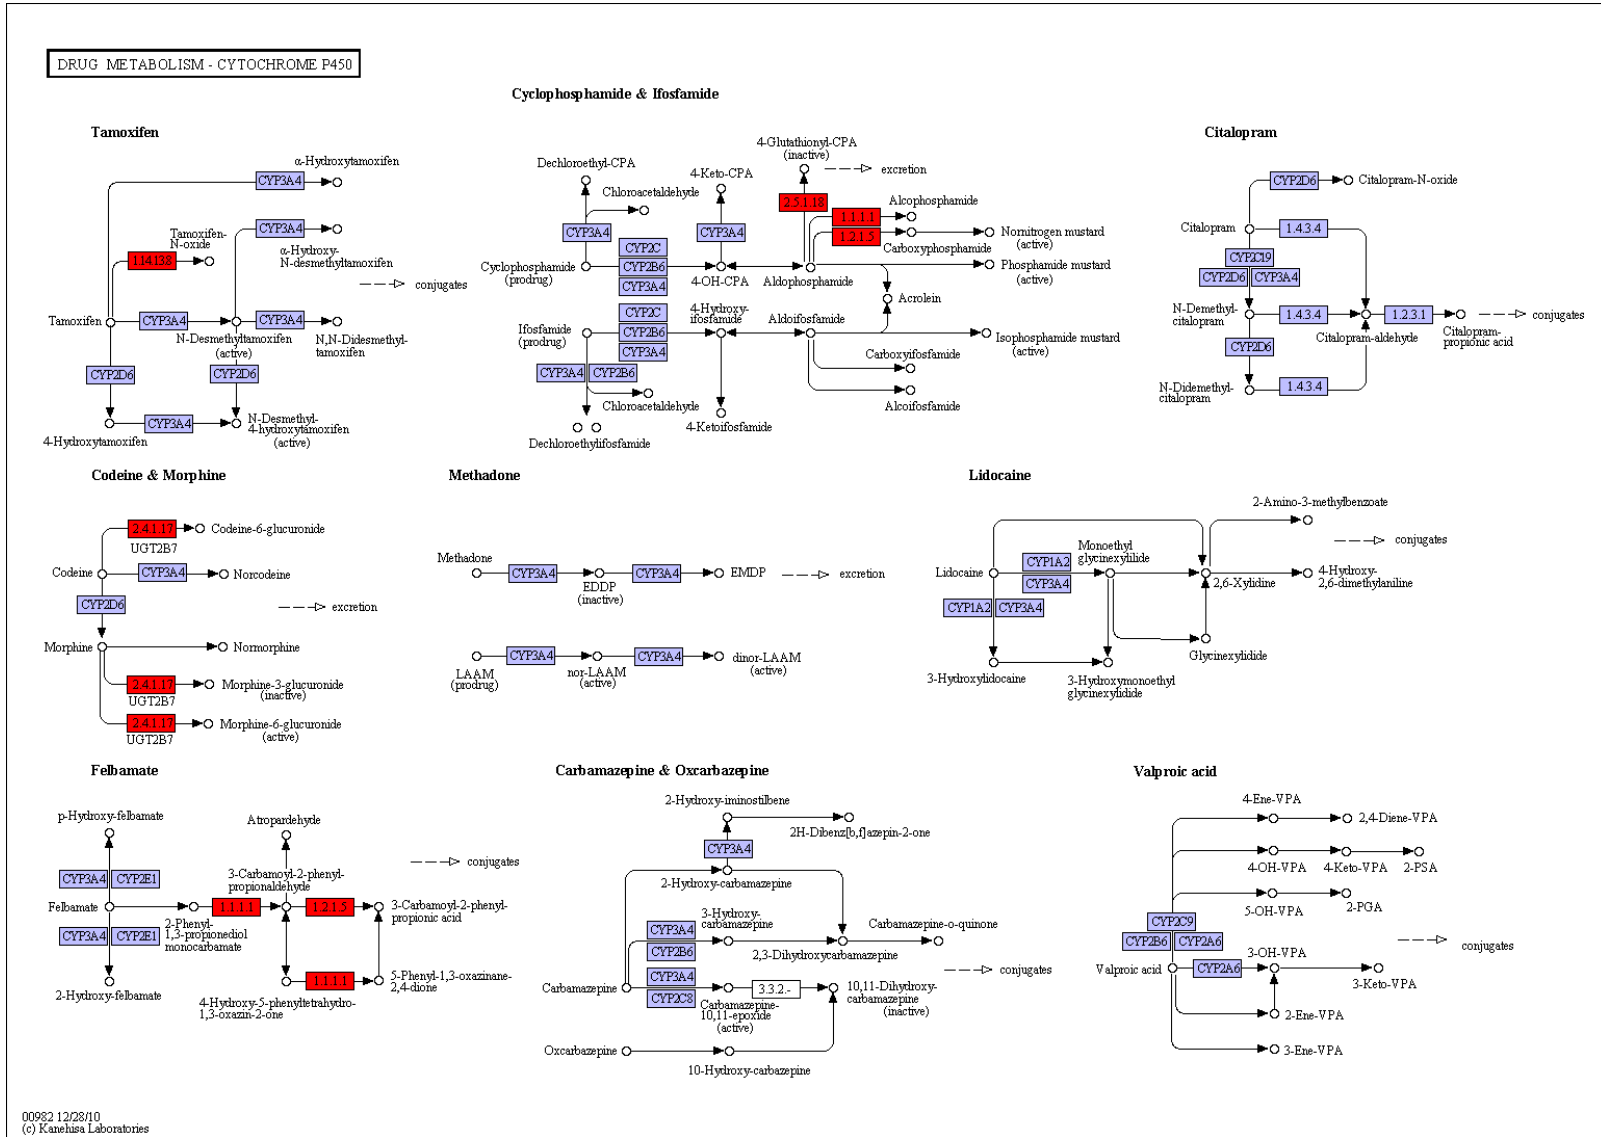

Figure 182: ko00982 Drug metabolism - cytochrome P450











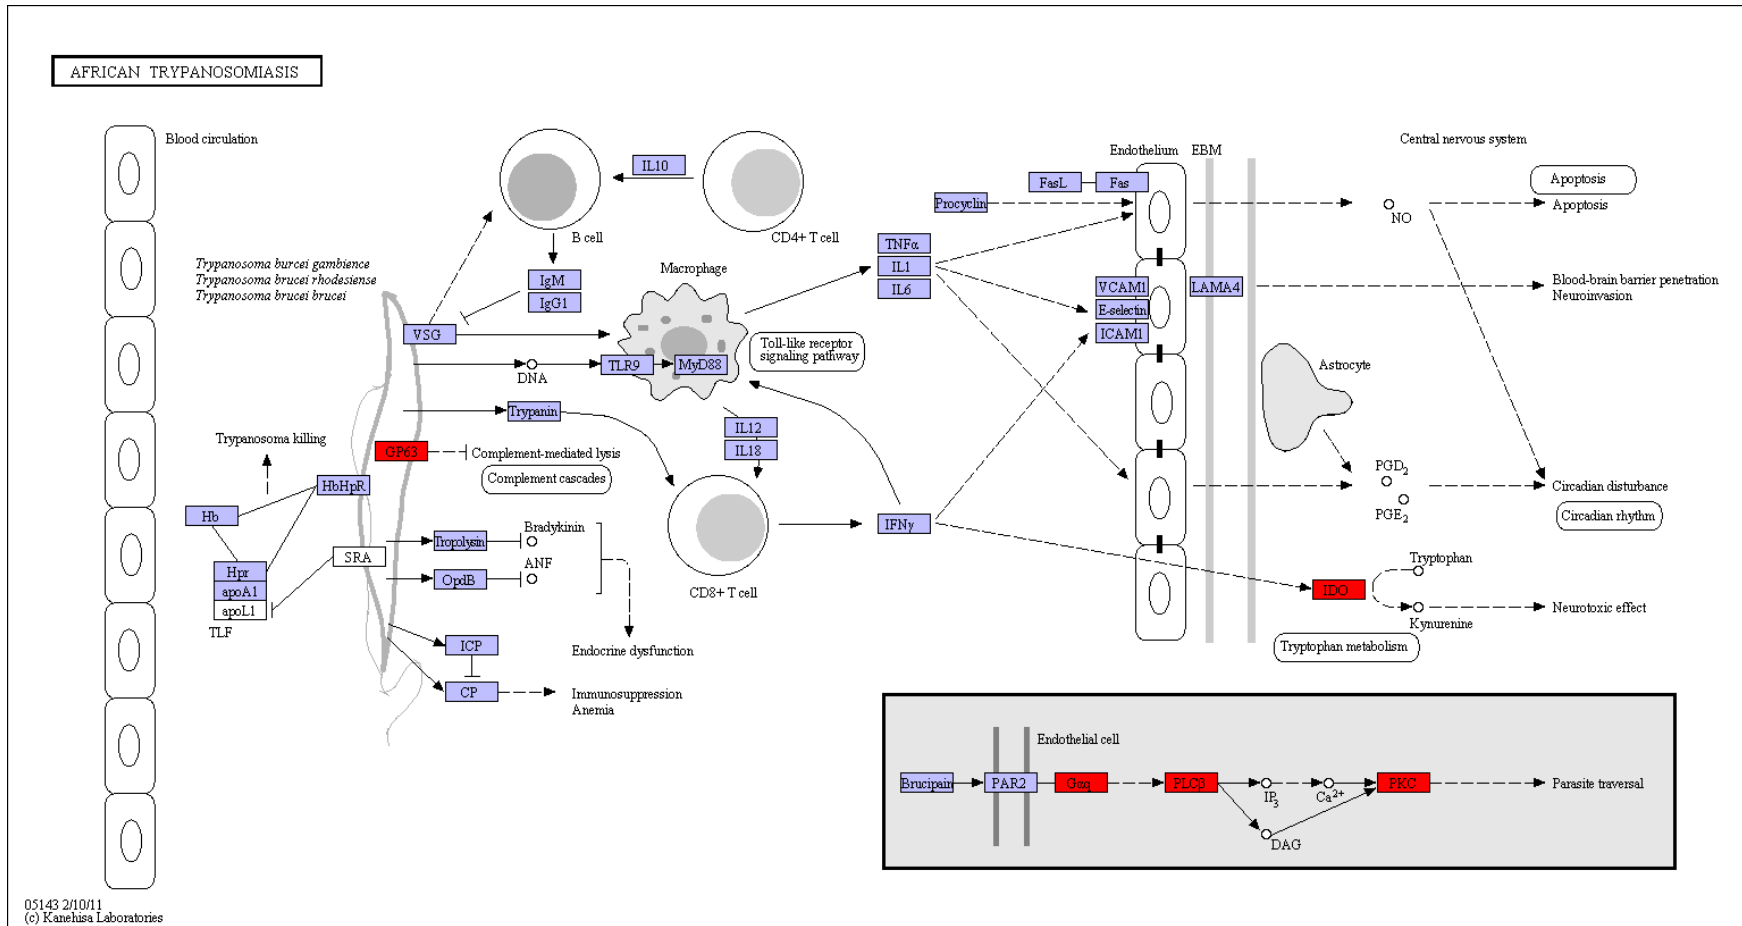

Figure 187: ko05143 African trypanosomiasis

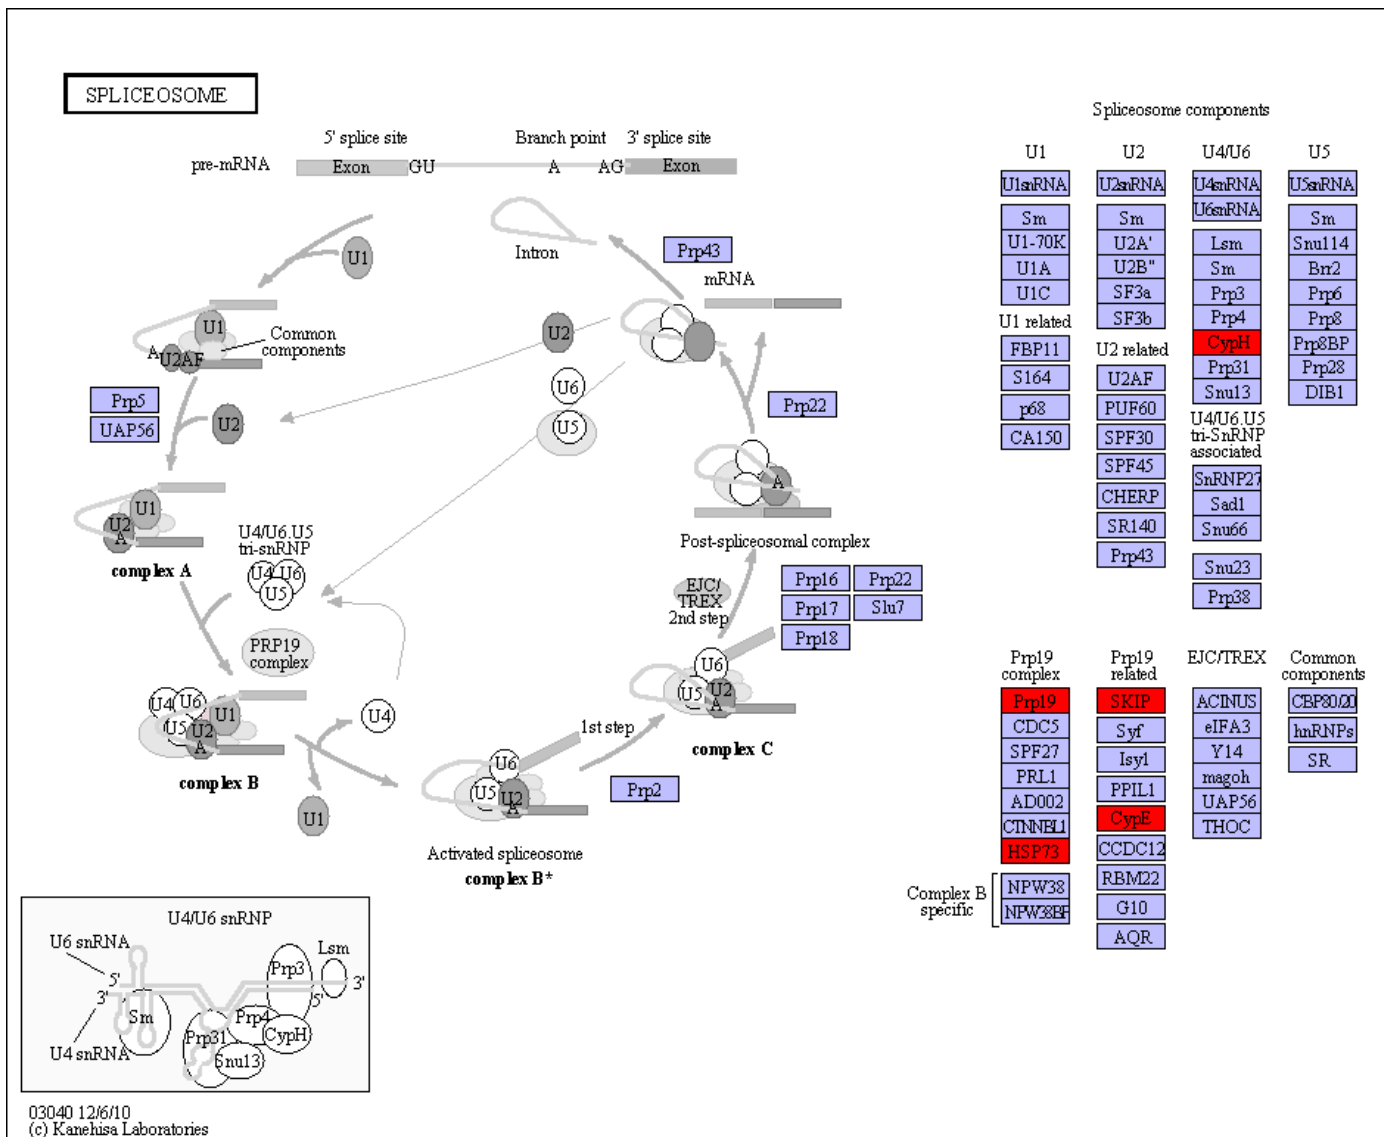

Figure 188: ko03040 Spliceosome

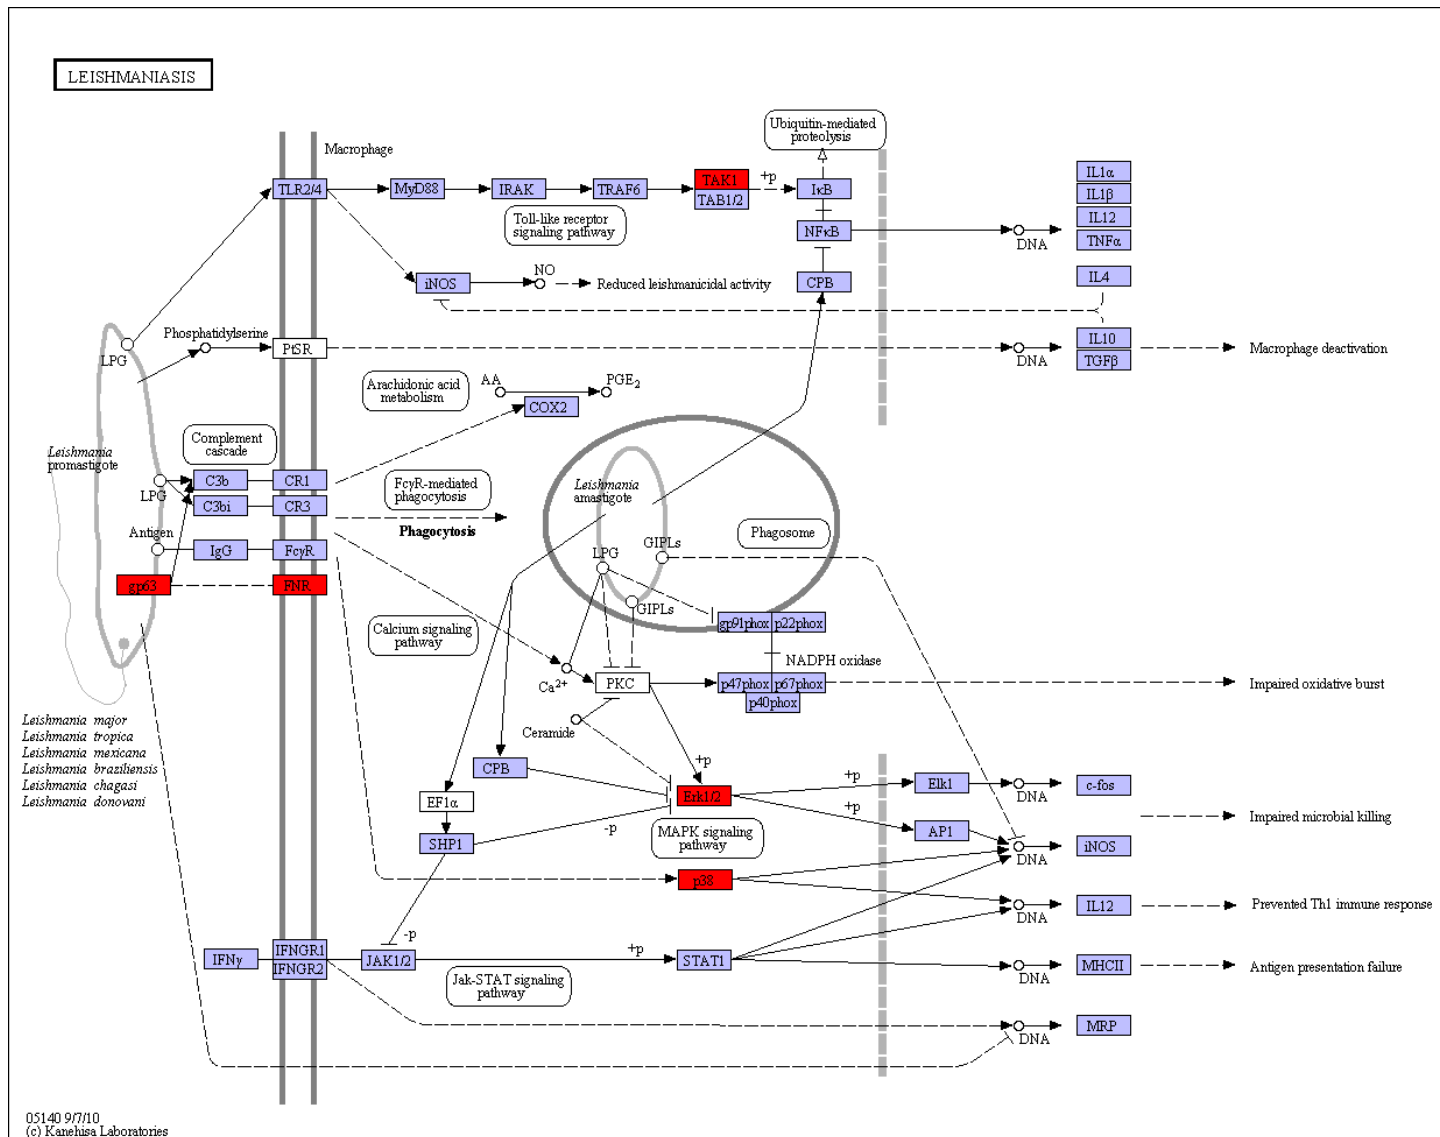

Figure 189: ko05140 Leishmaniasis

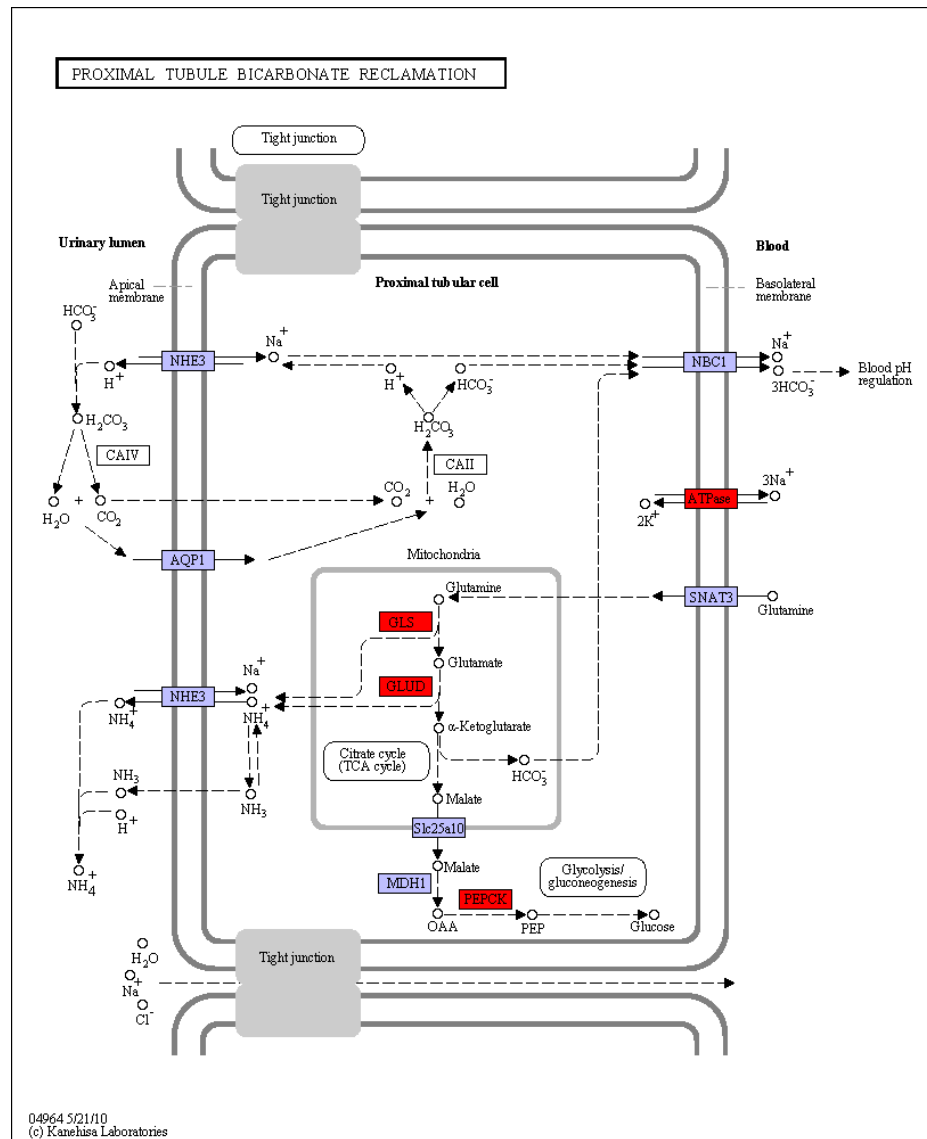

Figure 190: ko04964 Proximal tubule bicarbonate reclamation

RENIN - ANGIOTENSIN SYSTEM

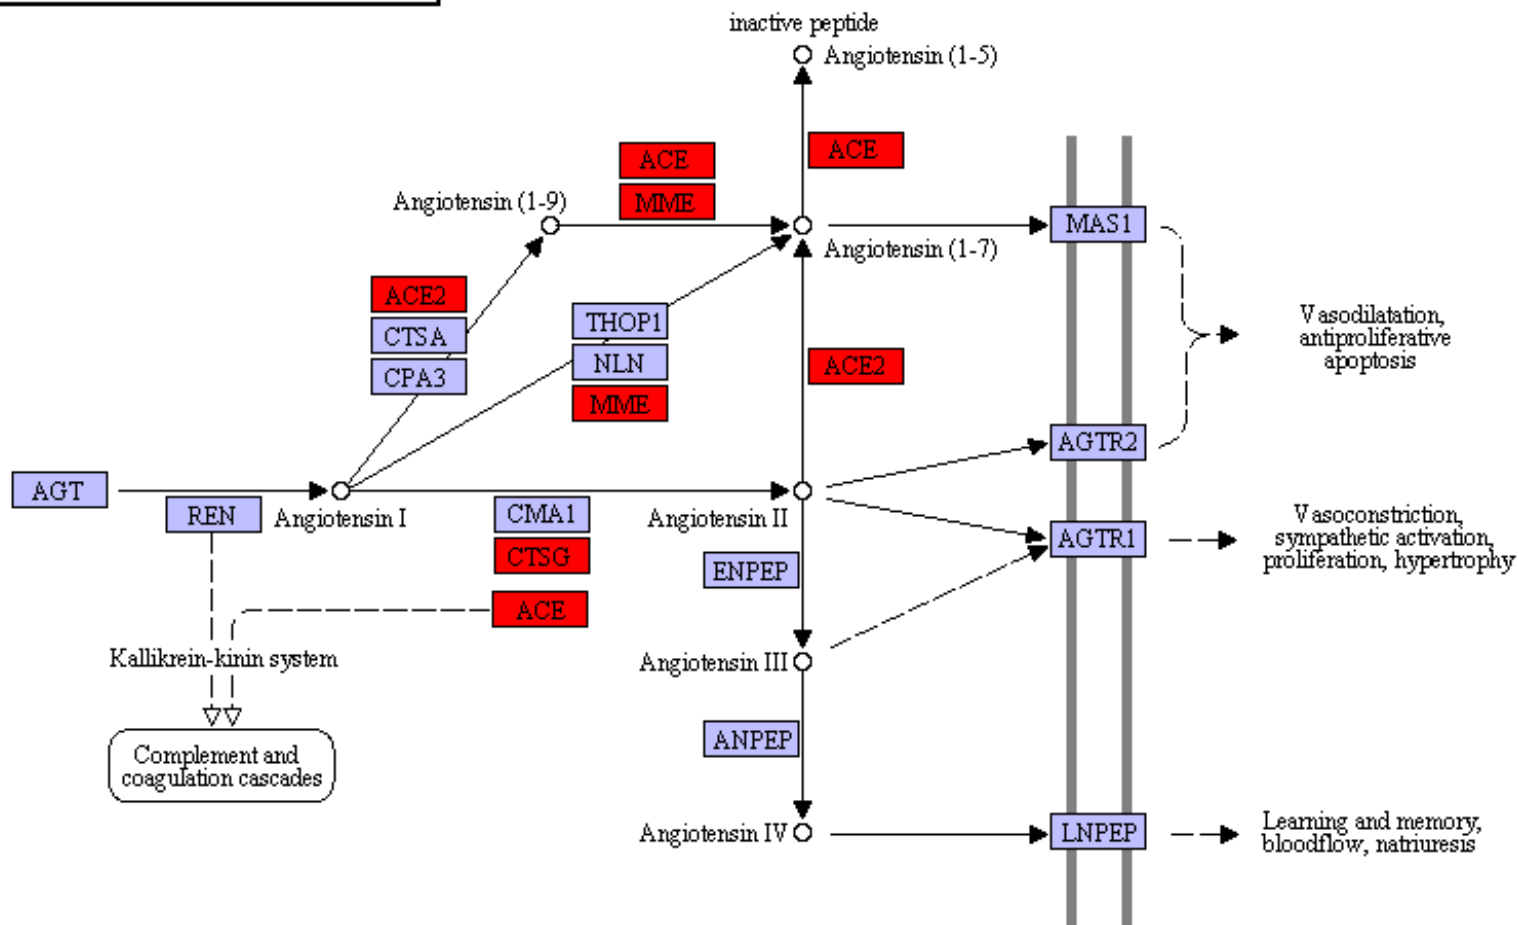

04614 1/15/10  
 (c) Kanehisa Laboratories

Figure 191: ko04614 Renin-angiotensin system



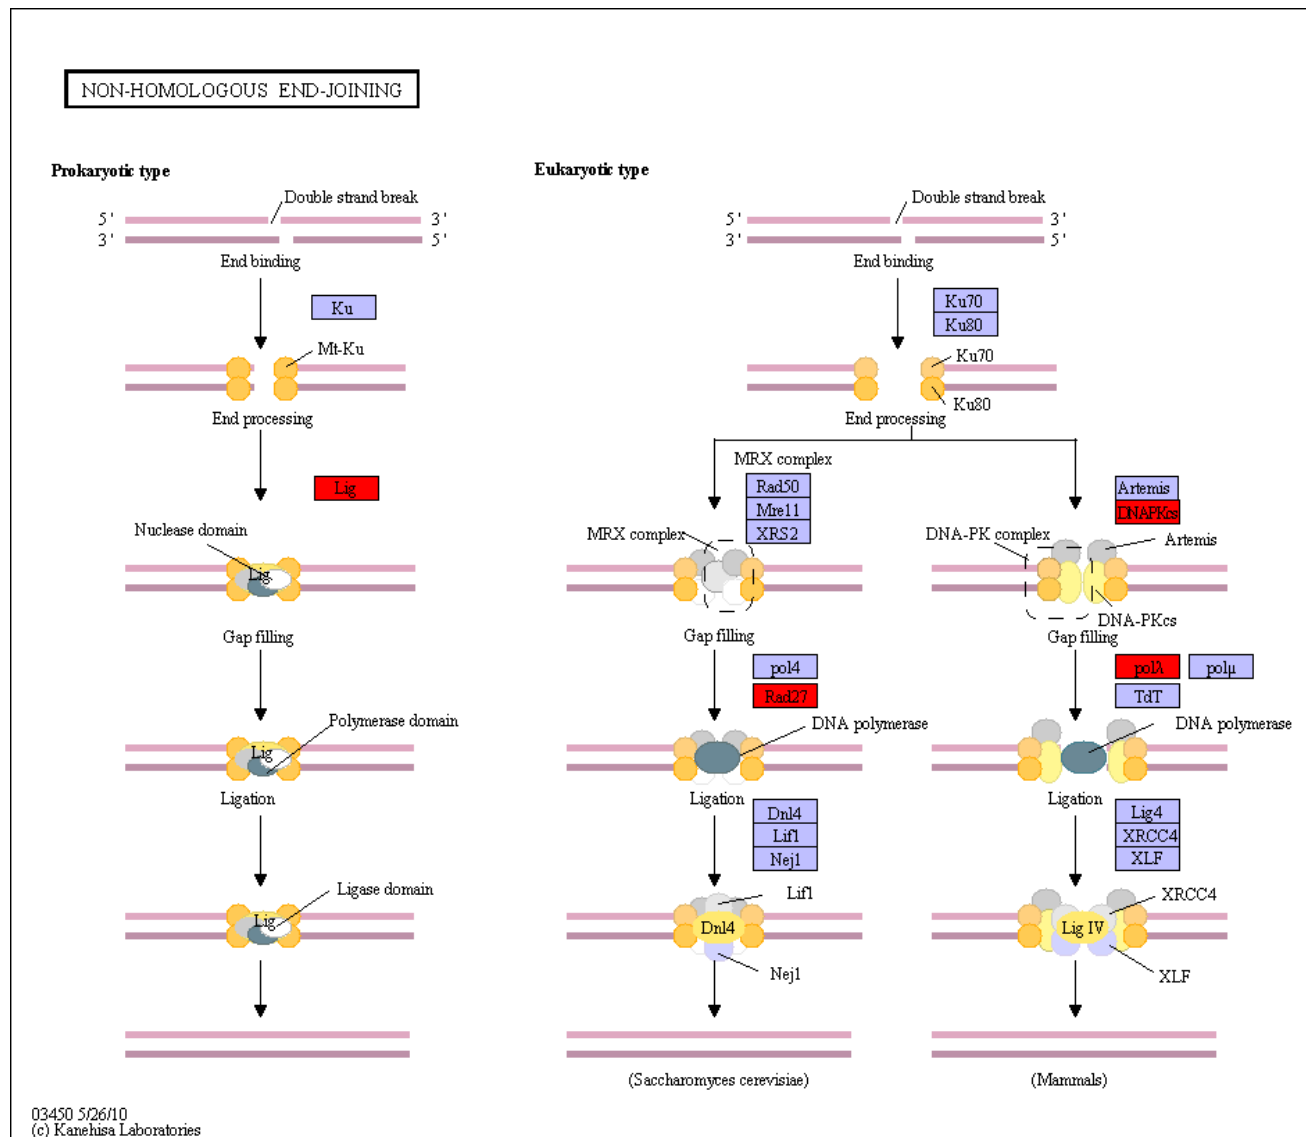

Figure 192: ko03450 Non-homologous end-joining

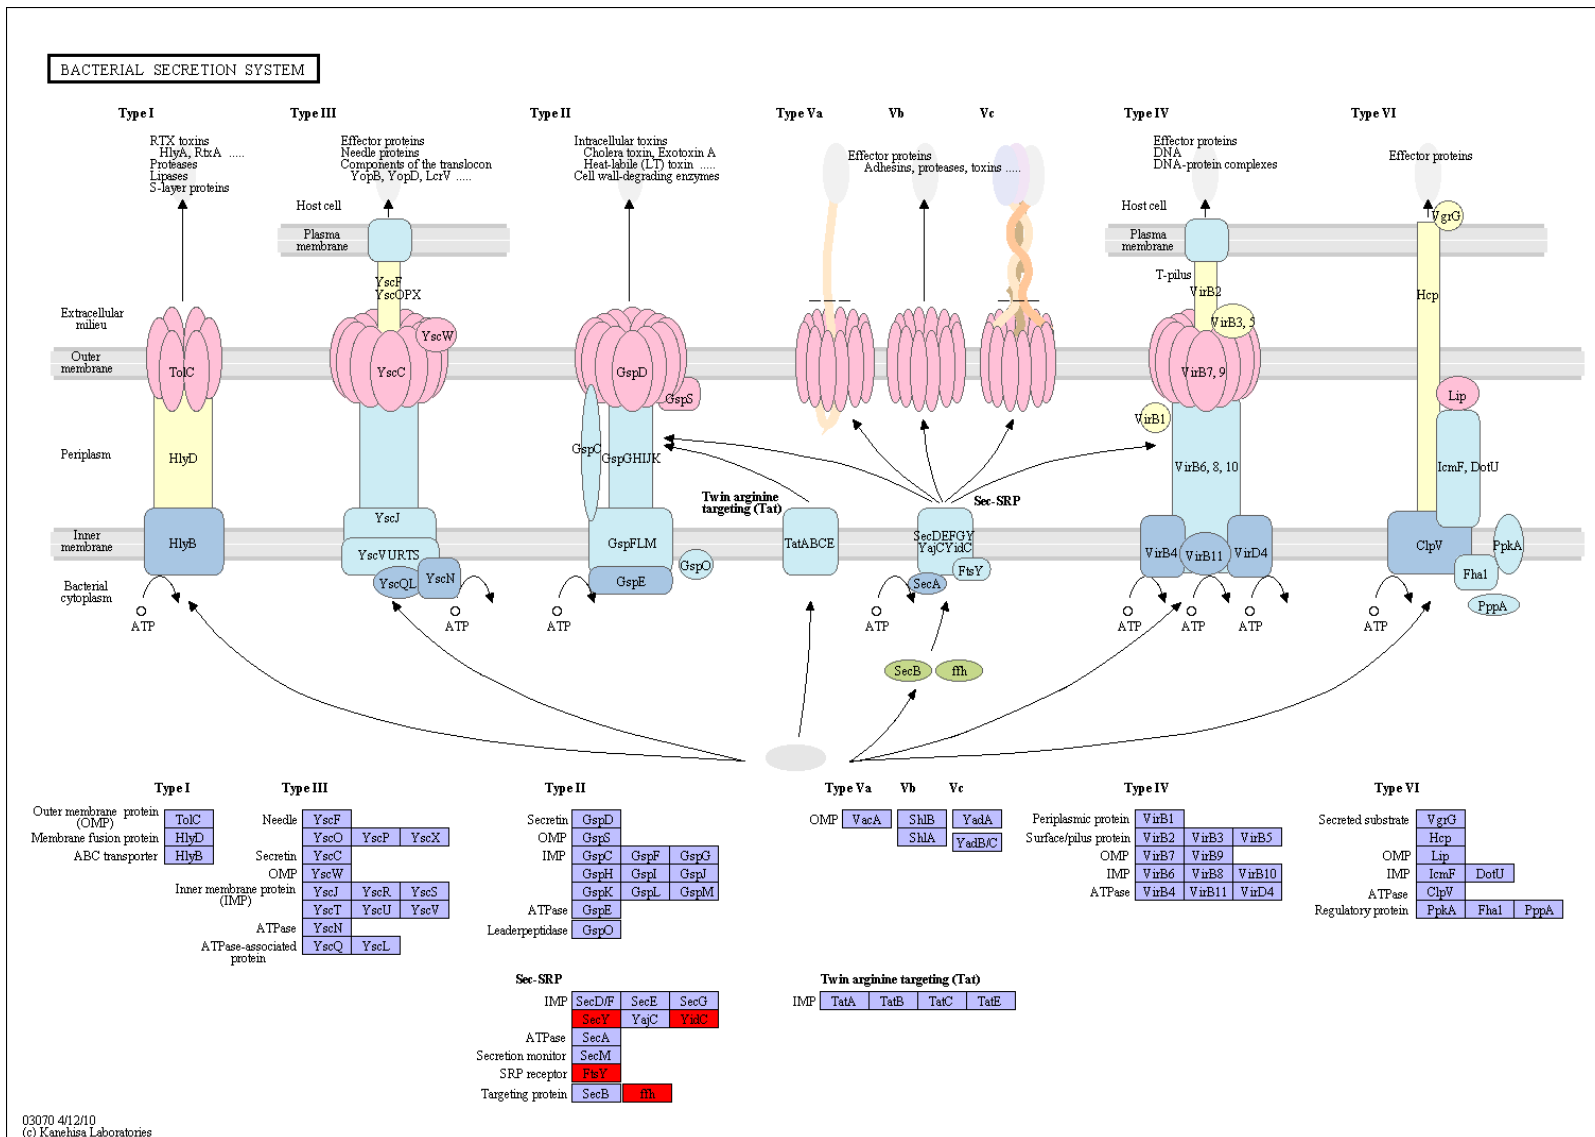

Figure 193: ko03070 Bacterial secretion system

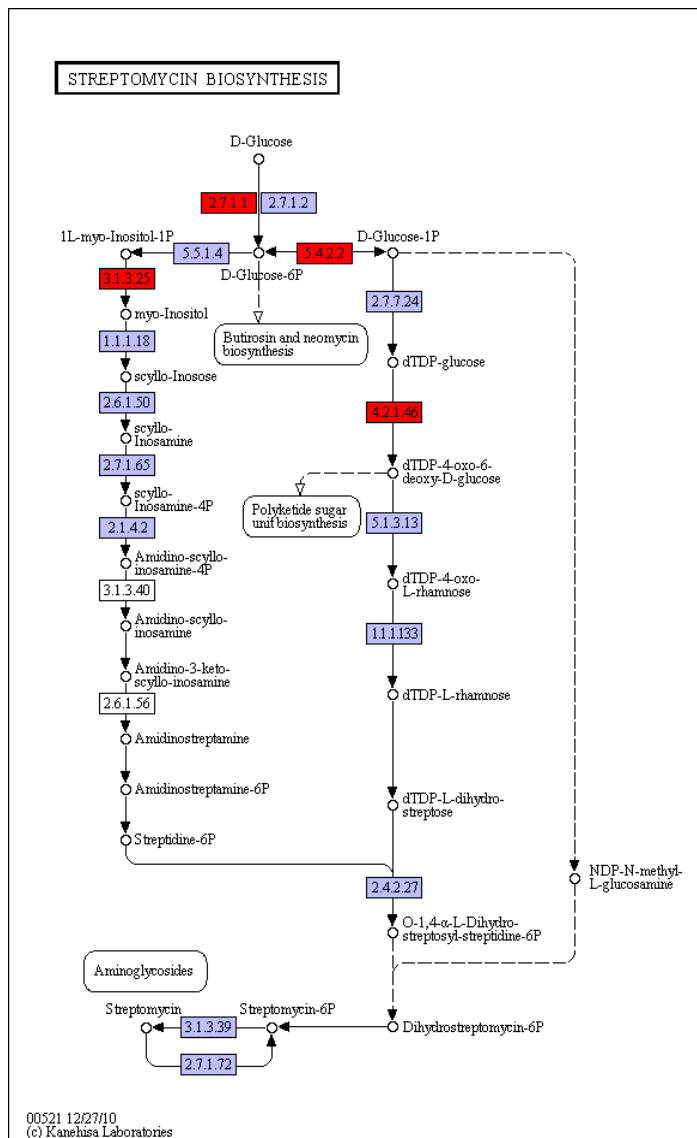

Figure 194: ko00521 Streptomycin biosynthesis

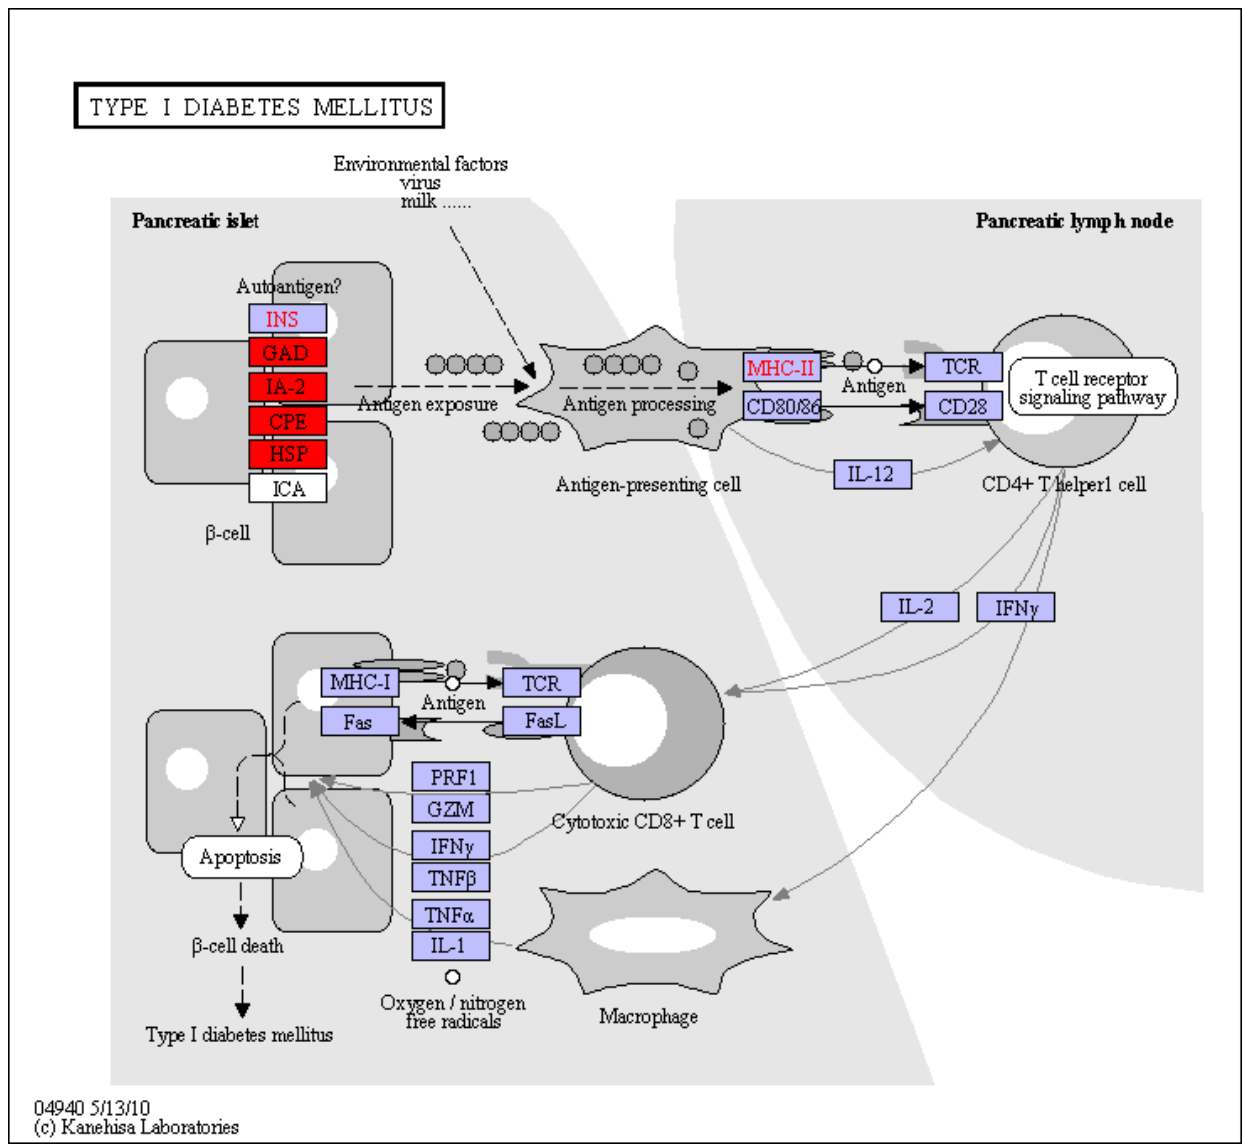

Figure 195: ko04940 Type I diabetes mellitus



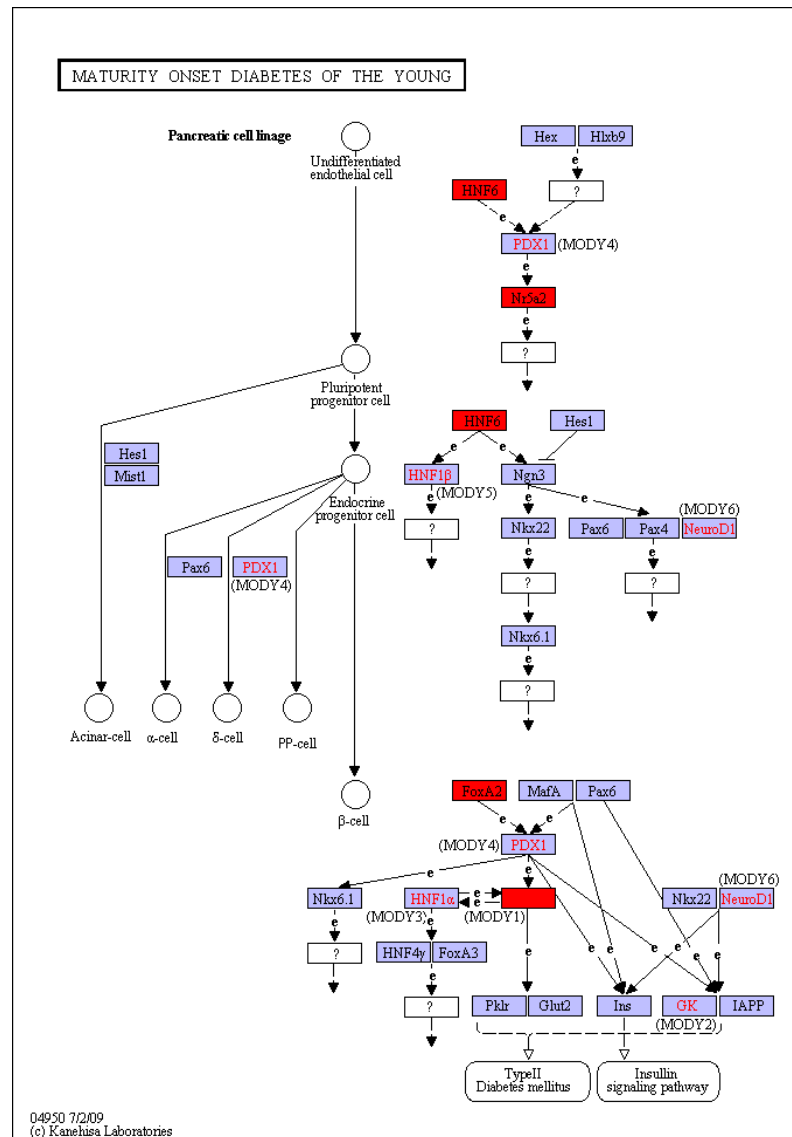

Figure 197: ko04950 Maturity onset diabetes of the young

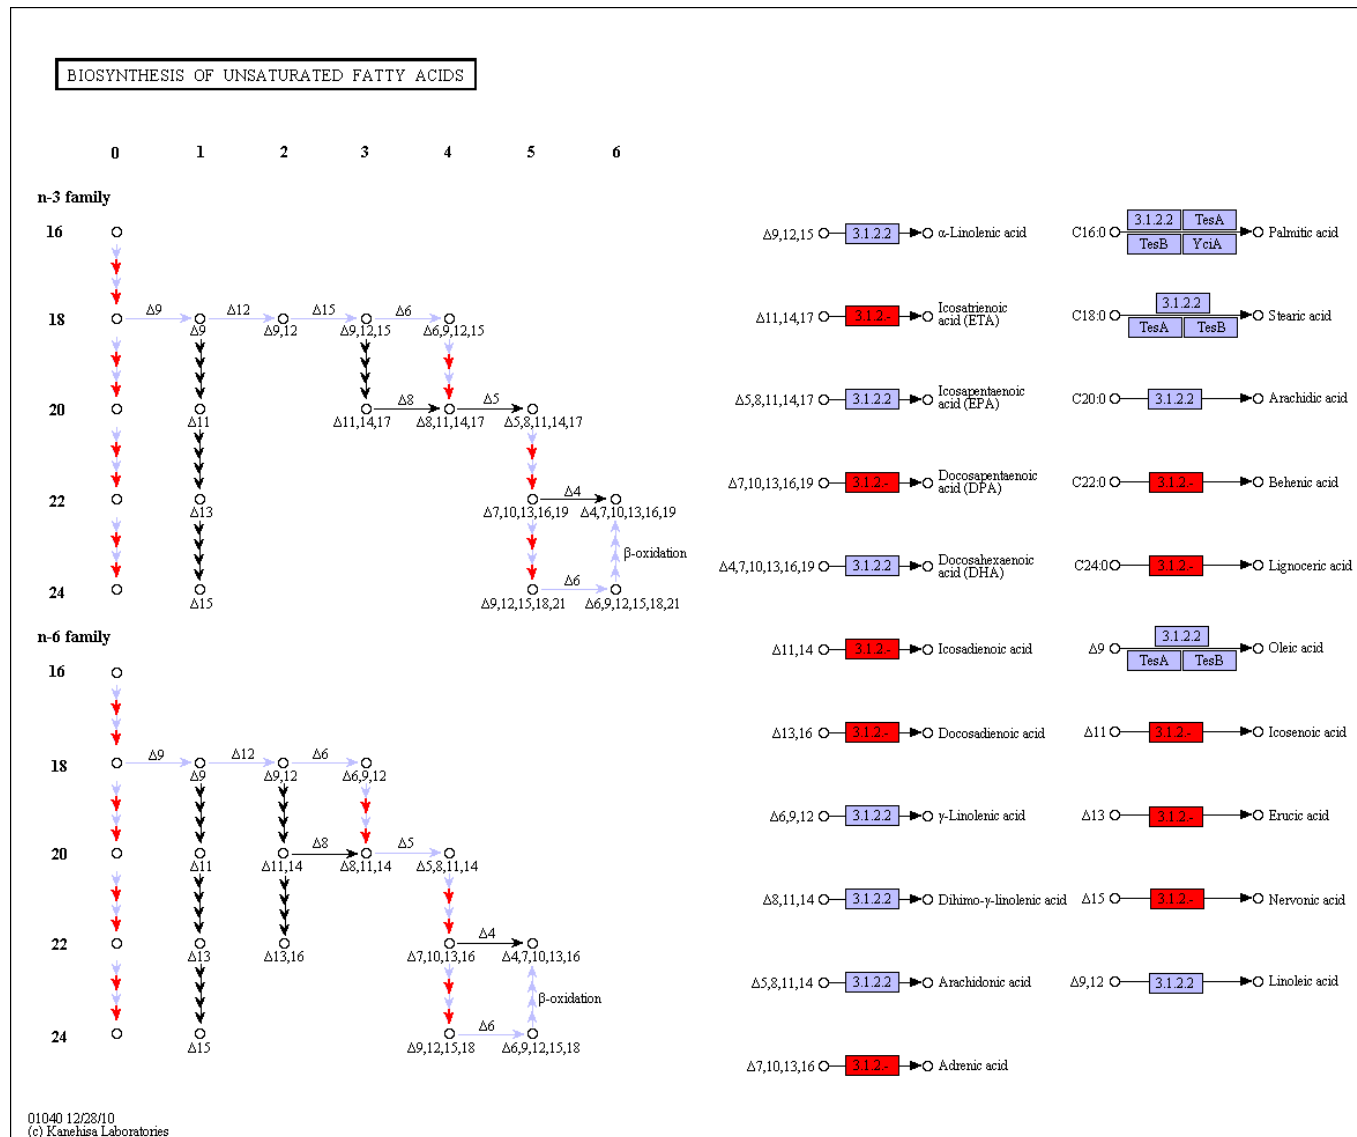

Figure 198: ko01040 Biosynthesis of unsaturated fatty acids

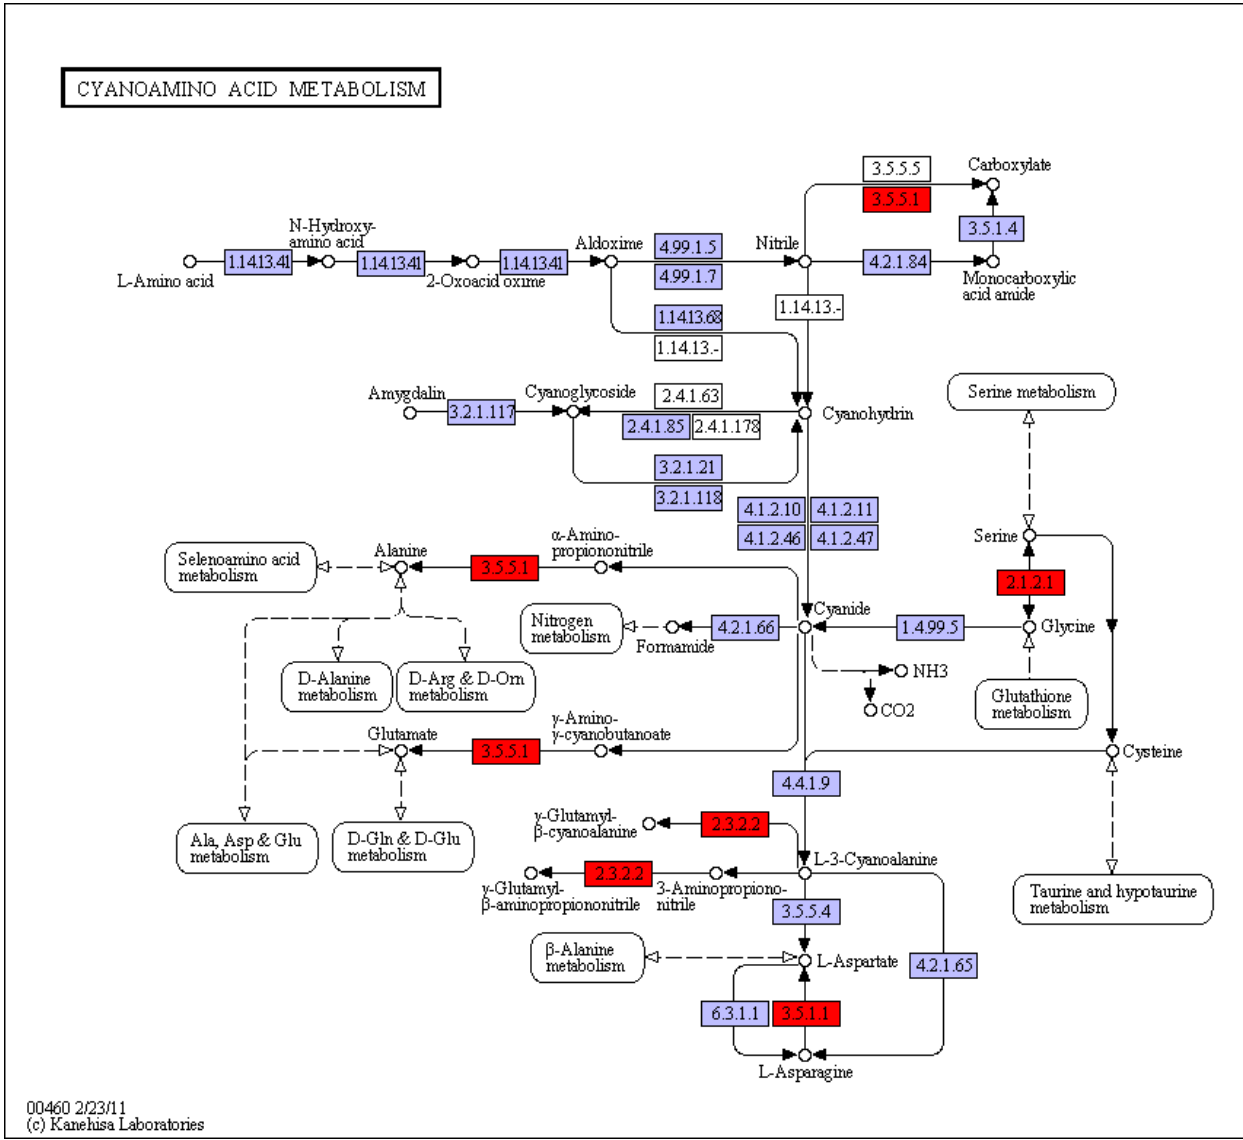

Figure 199: ko00460 Cyanoamino acid metabolism





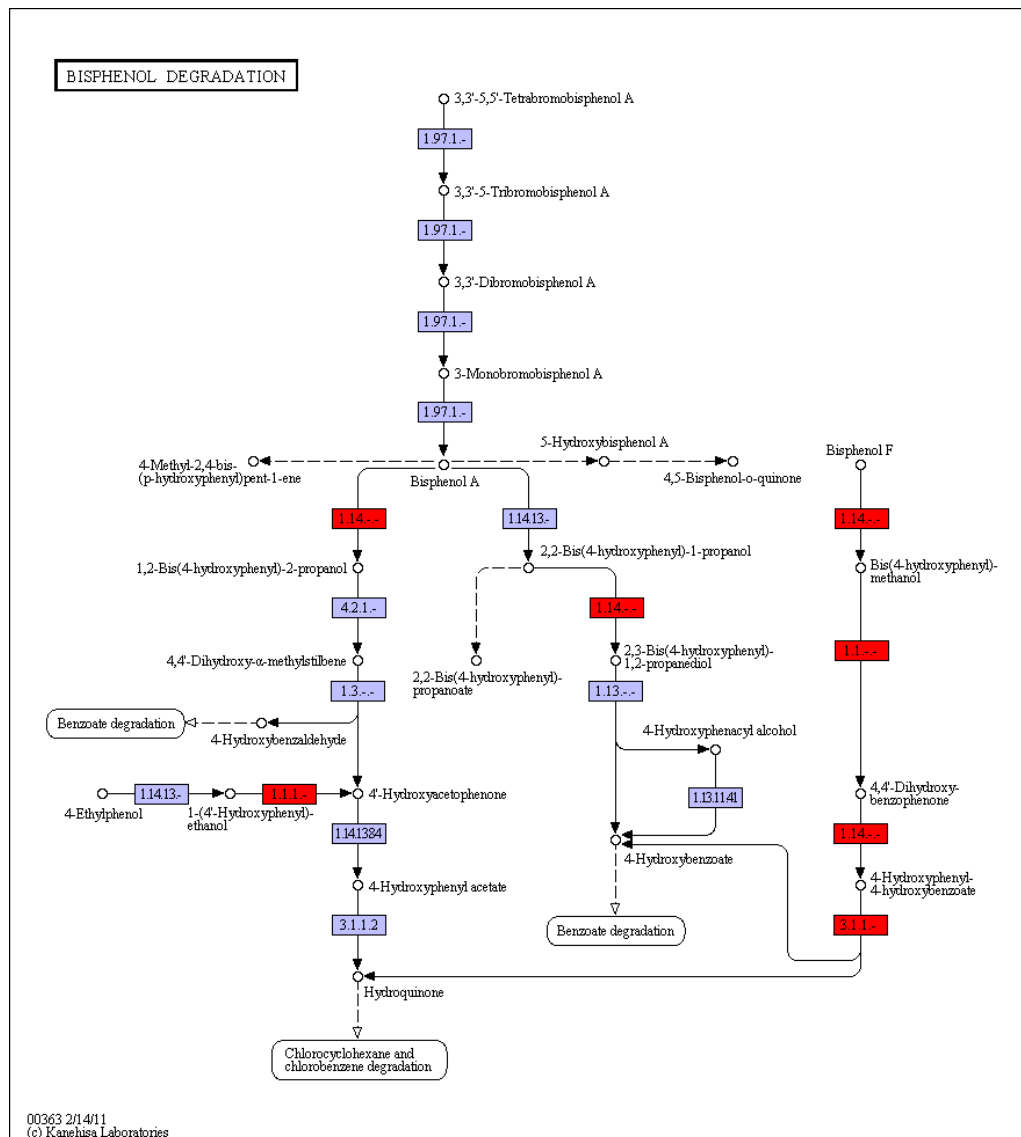

Figure 201: ko00363 Bisphenol degradation







**OTHER GLYCAN DEGRADATION**

**N-glycan**

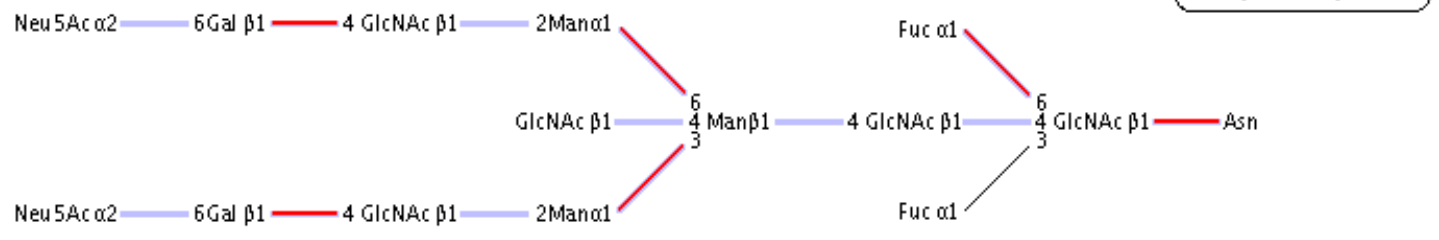

**Ganglioside**

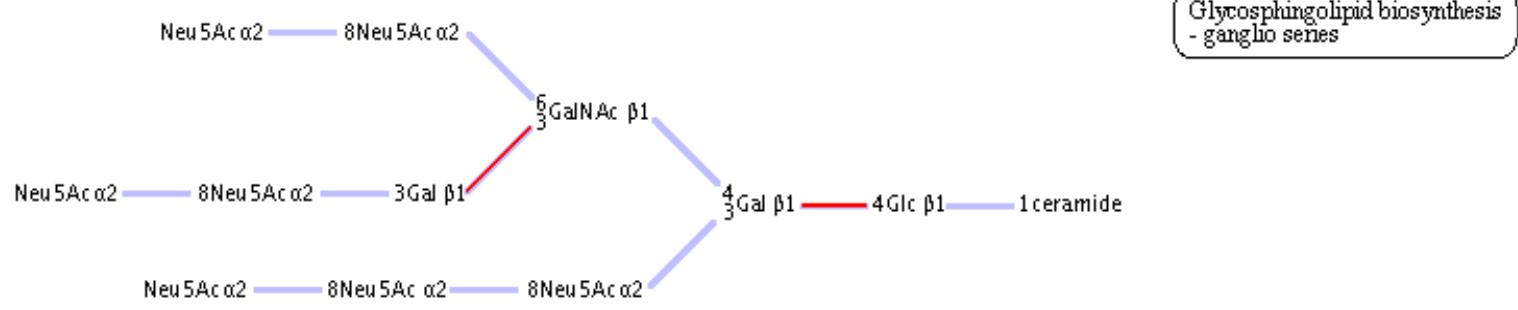

00511 2/1/11  
 (c) Kanehisa Laboratories

Figure 205: ko00511 Other glycan degradation

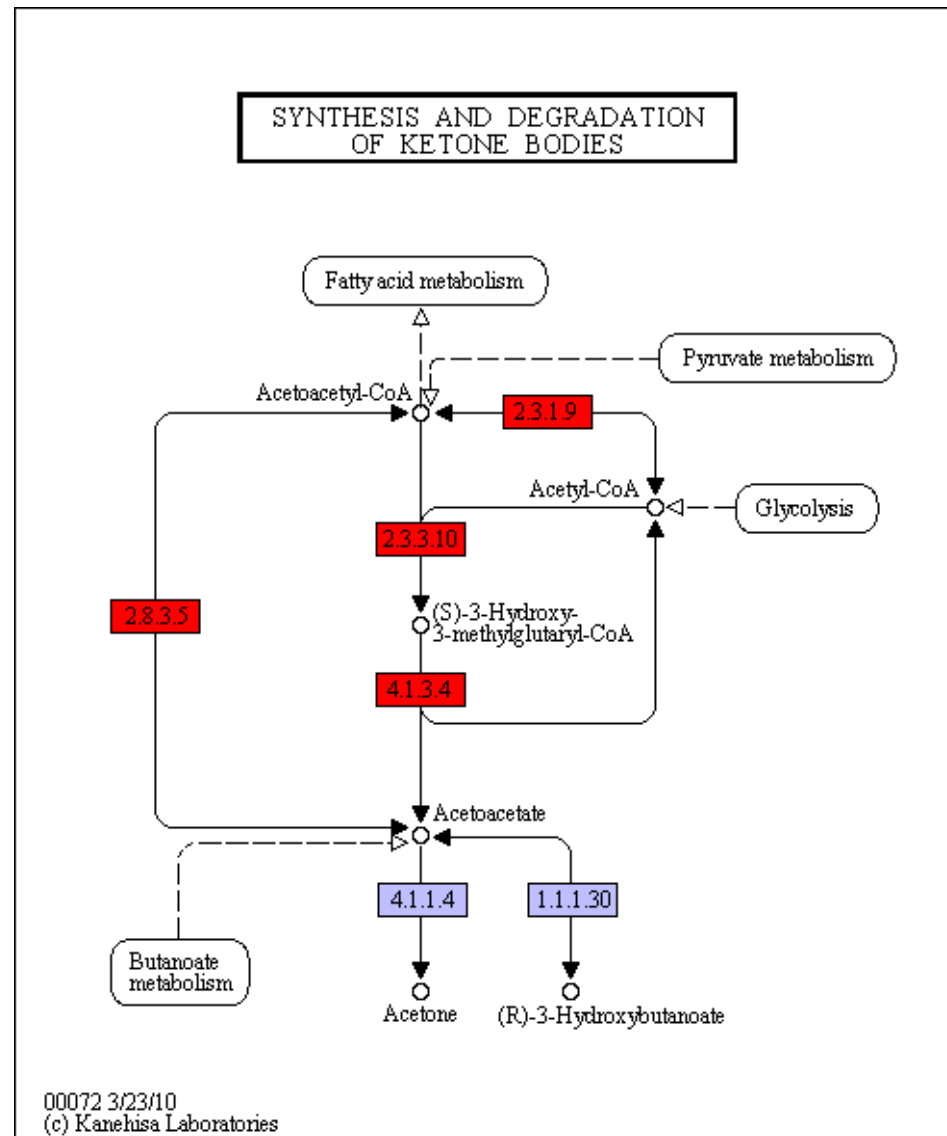

Figure 206: ko00072 Synthesis and degradation of ketone bodies





GLYCOSAMINOGLYCAN BIOSYNTHESIS - CHONDROITIN SULFATE

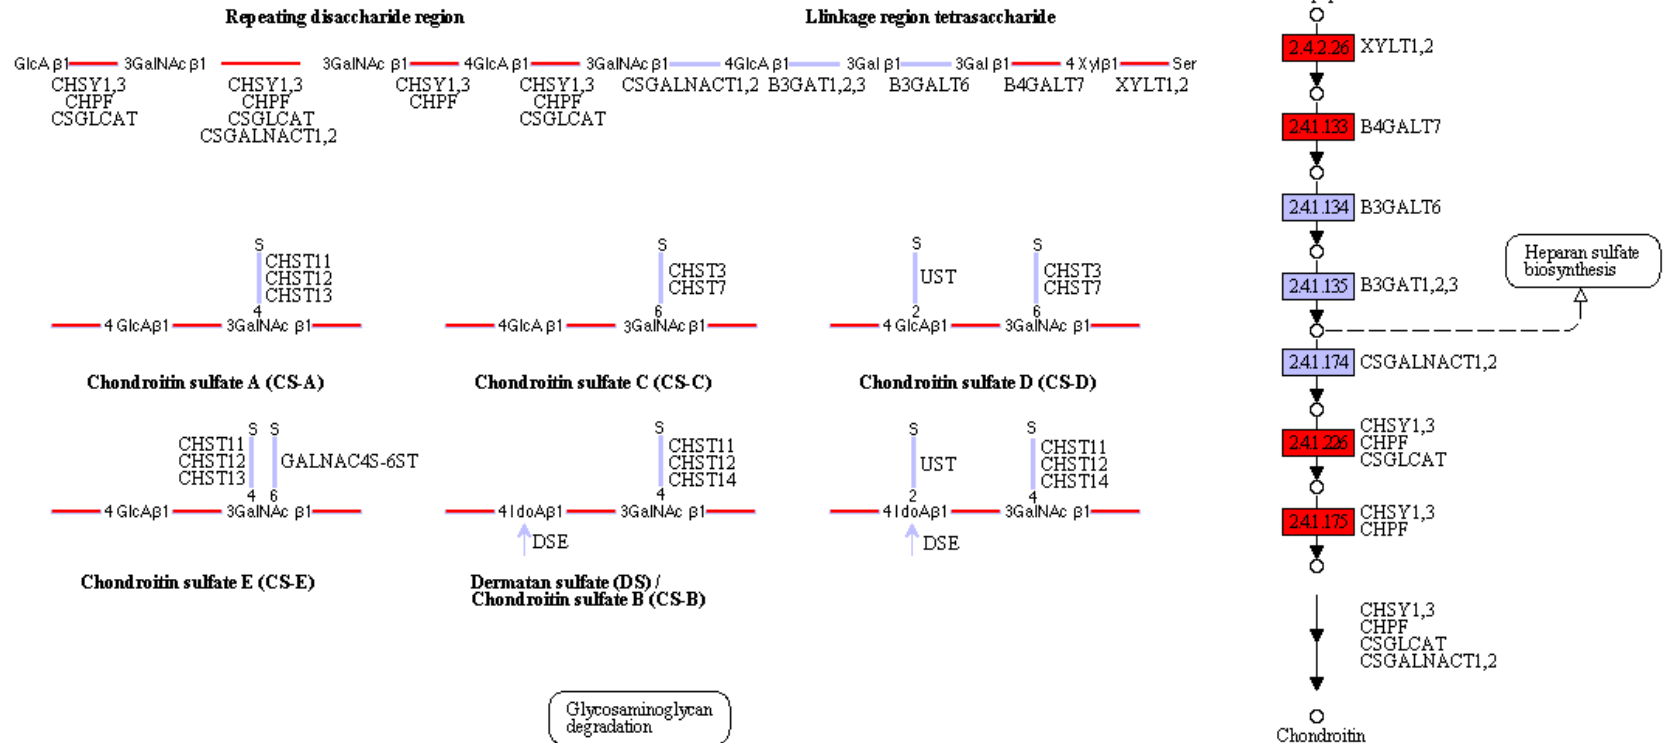

00532 3/8/10  
 (c) Kanehisa Laboratories

Figure 208: ko00532 Glycosaminoglycan biosynthesis - chondroitin sulfate

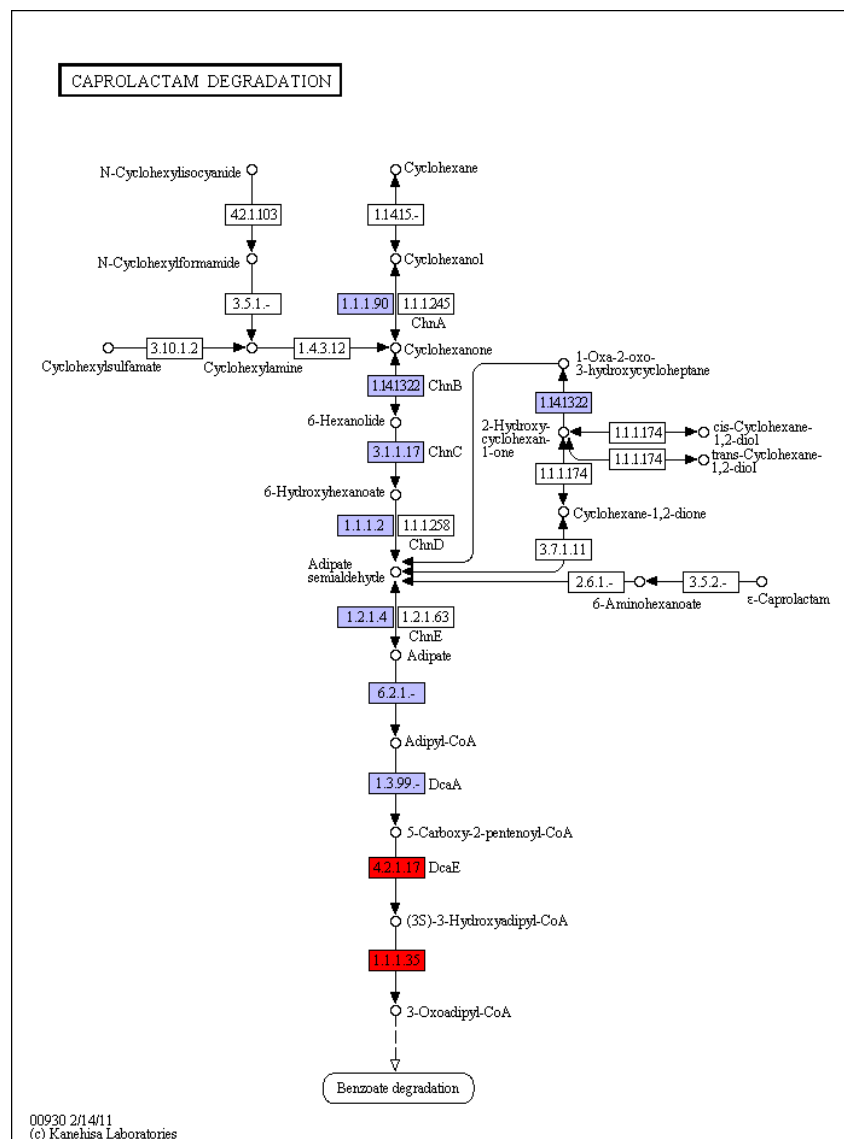

Figure 209: ko00930 Caprolactam degradation





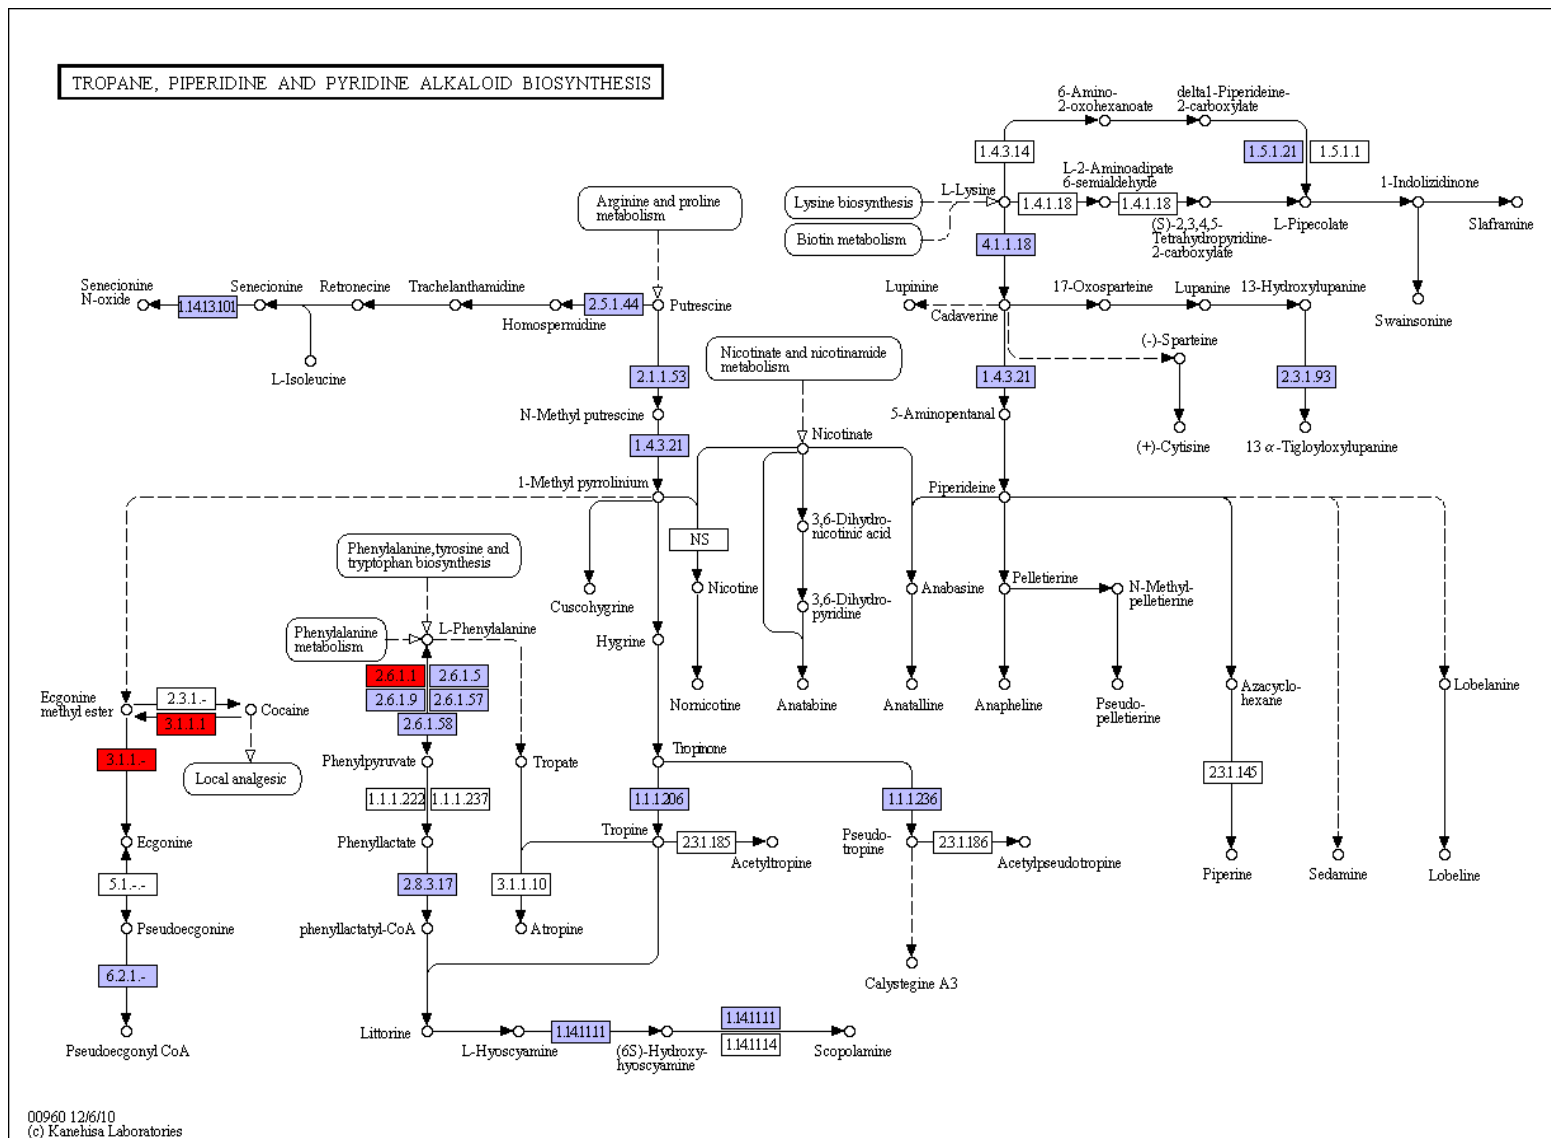

Figure 212: ko00960 Tropane, piperidine and pyridine alkaloid biosynthesis

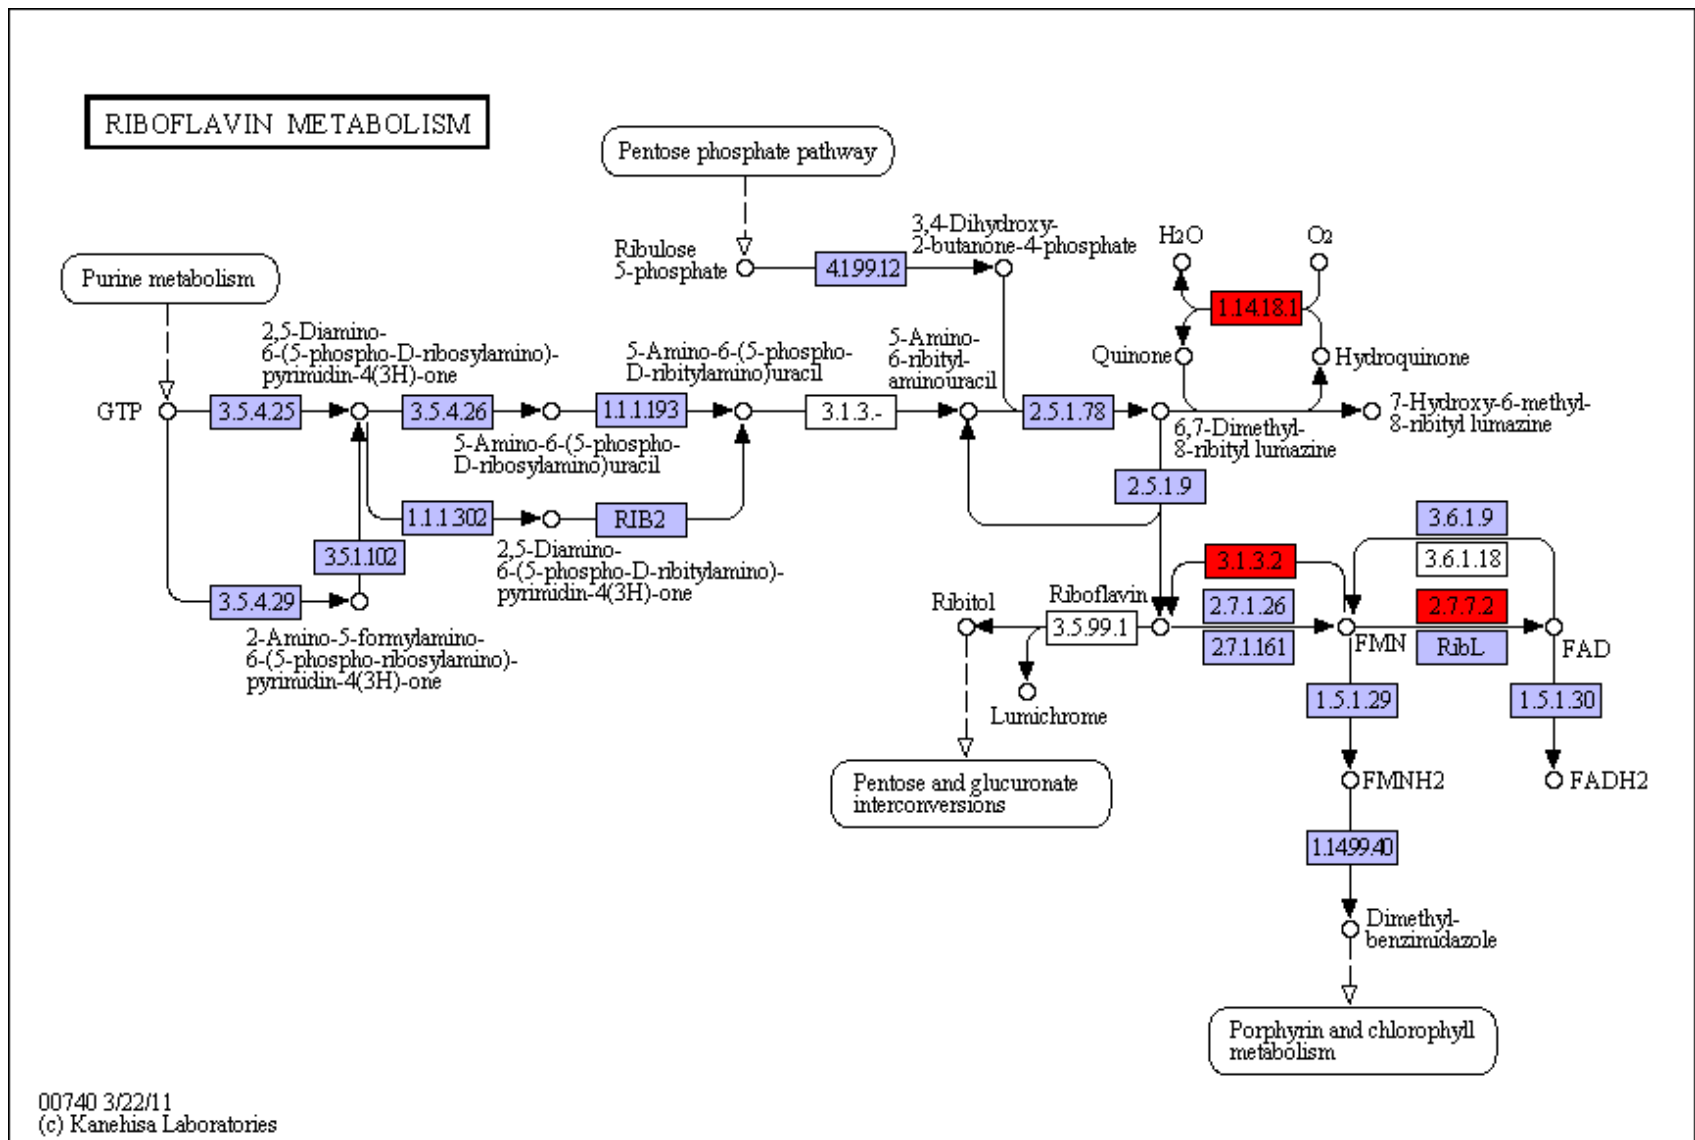

00740 3/22/11  
 (c) Kanehisa Laboratories

Figure 213: ko00740 Riboflavin metabolism

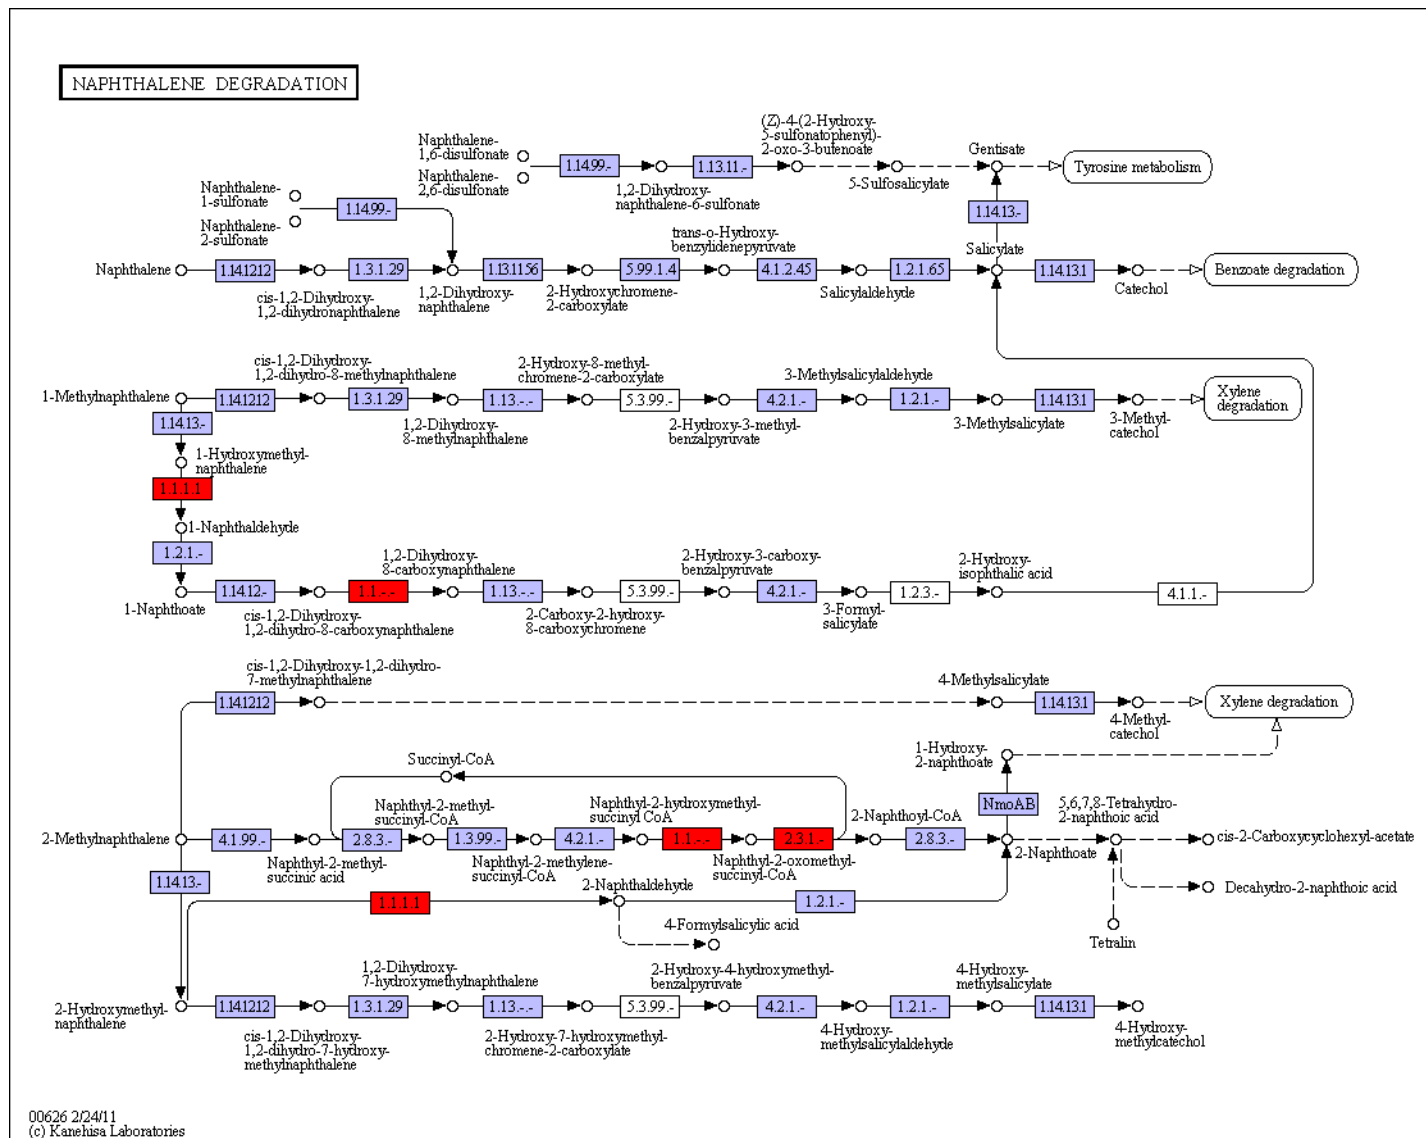

Figure 214: ko00626 Naphthalene degradation







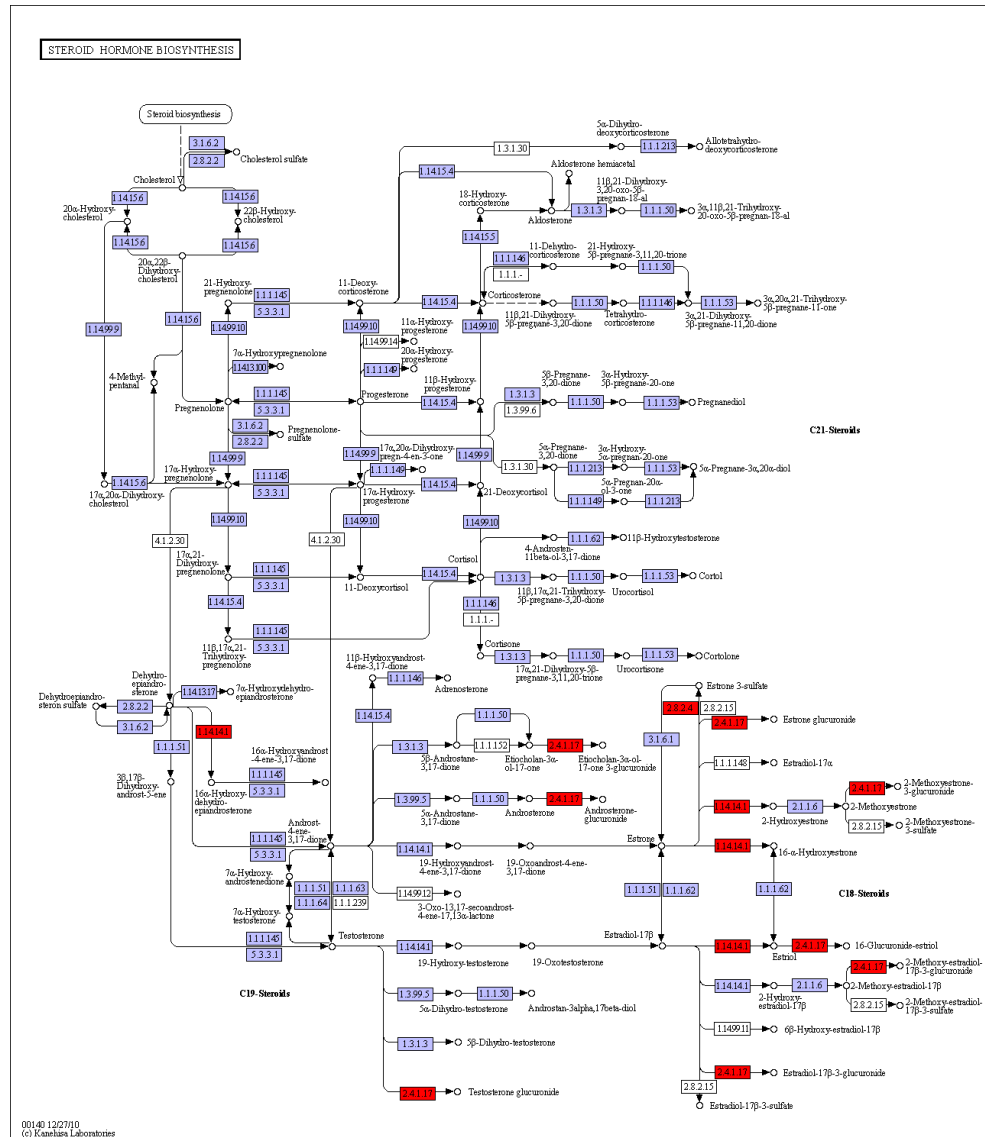

Figure 217: ko00140 Steroid hormone biosynthesis

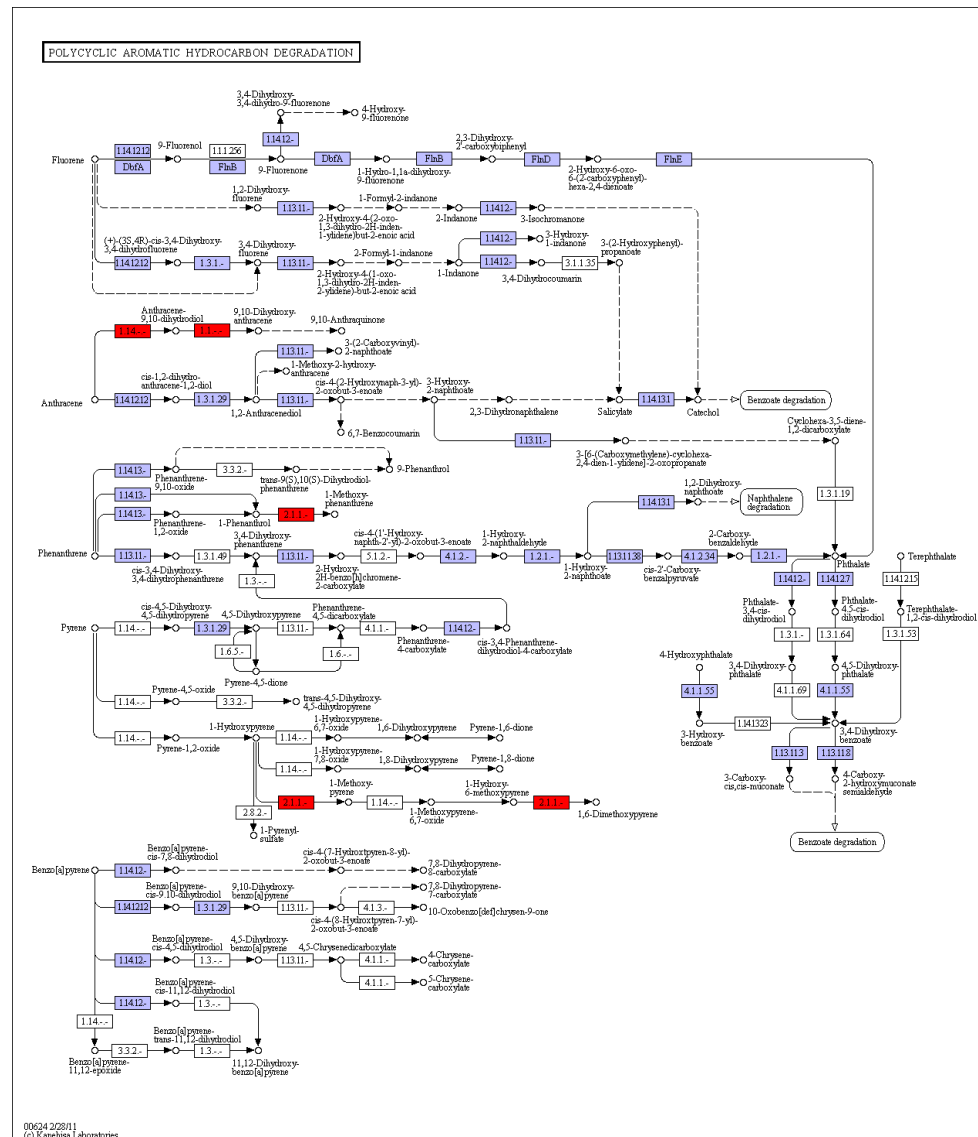

Figure 218: ko00624 Polycyclic aromatic hydrocarbon degradation

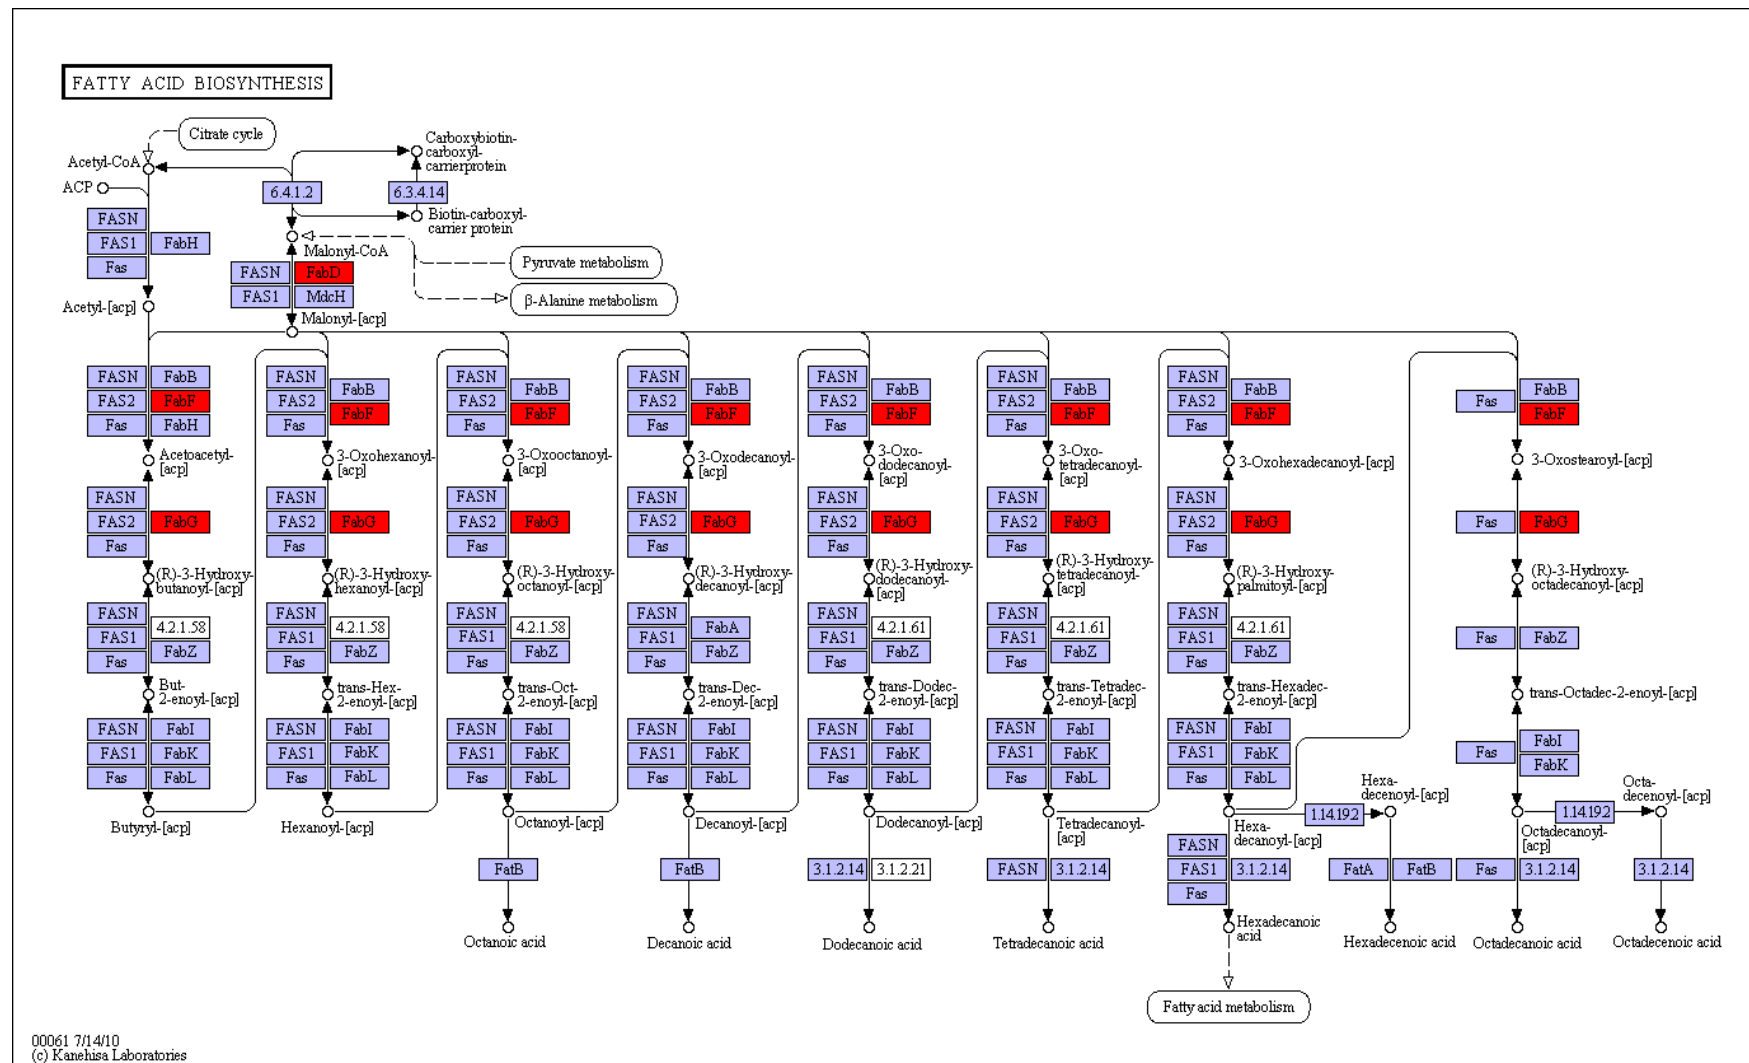

Figure 219: ko00061 Fatty acid biosynthesis

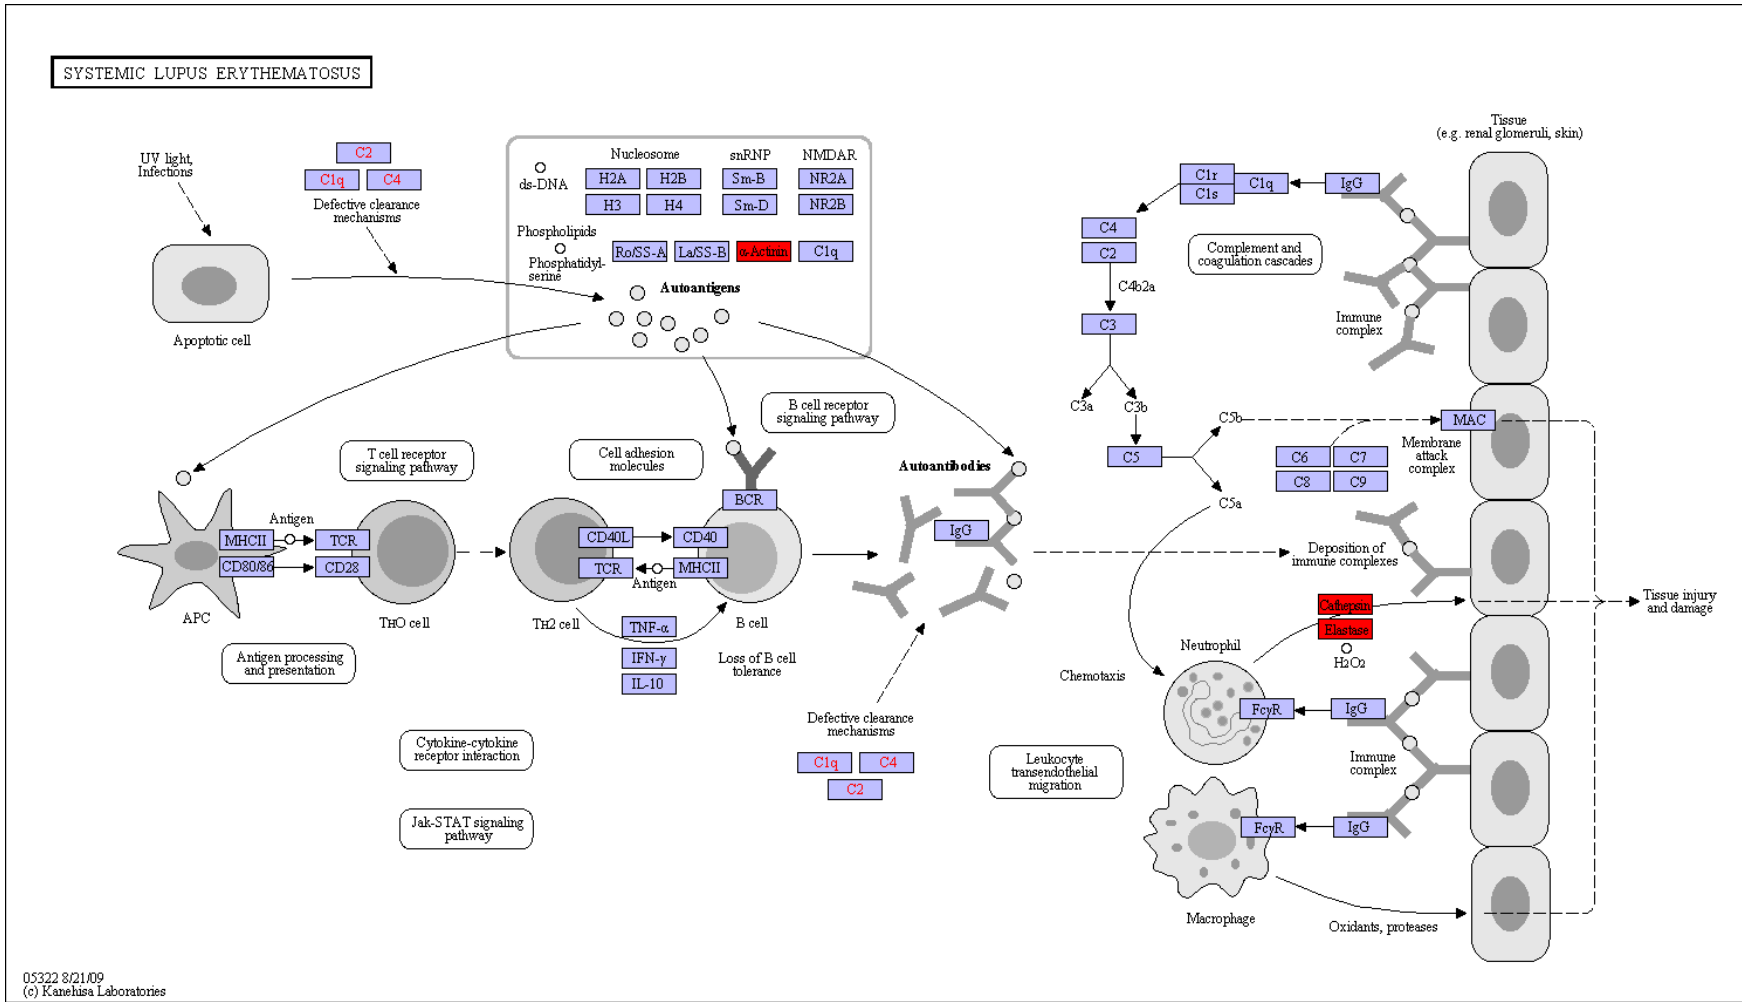

Figure 220: ko5322 Systemic lupus erythematosus

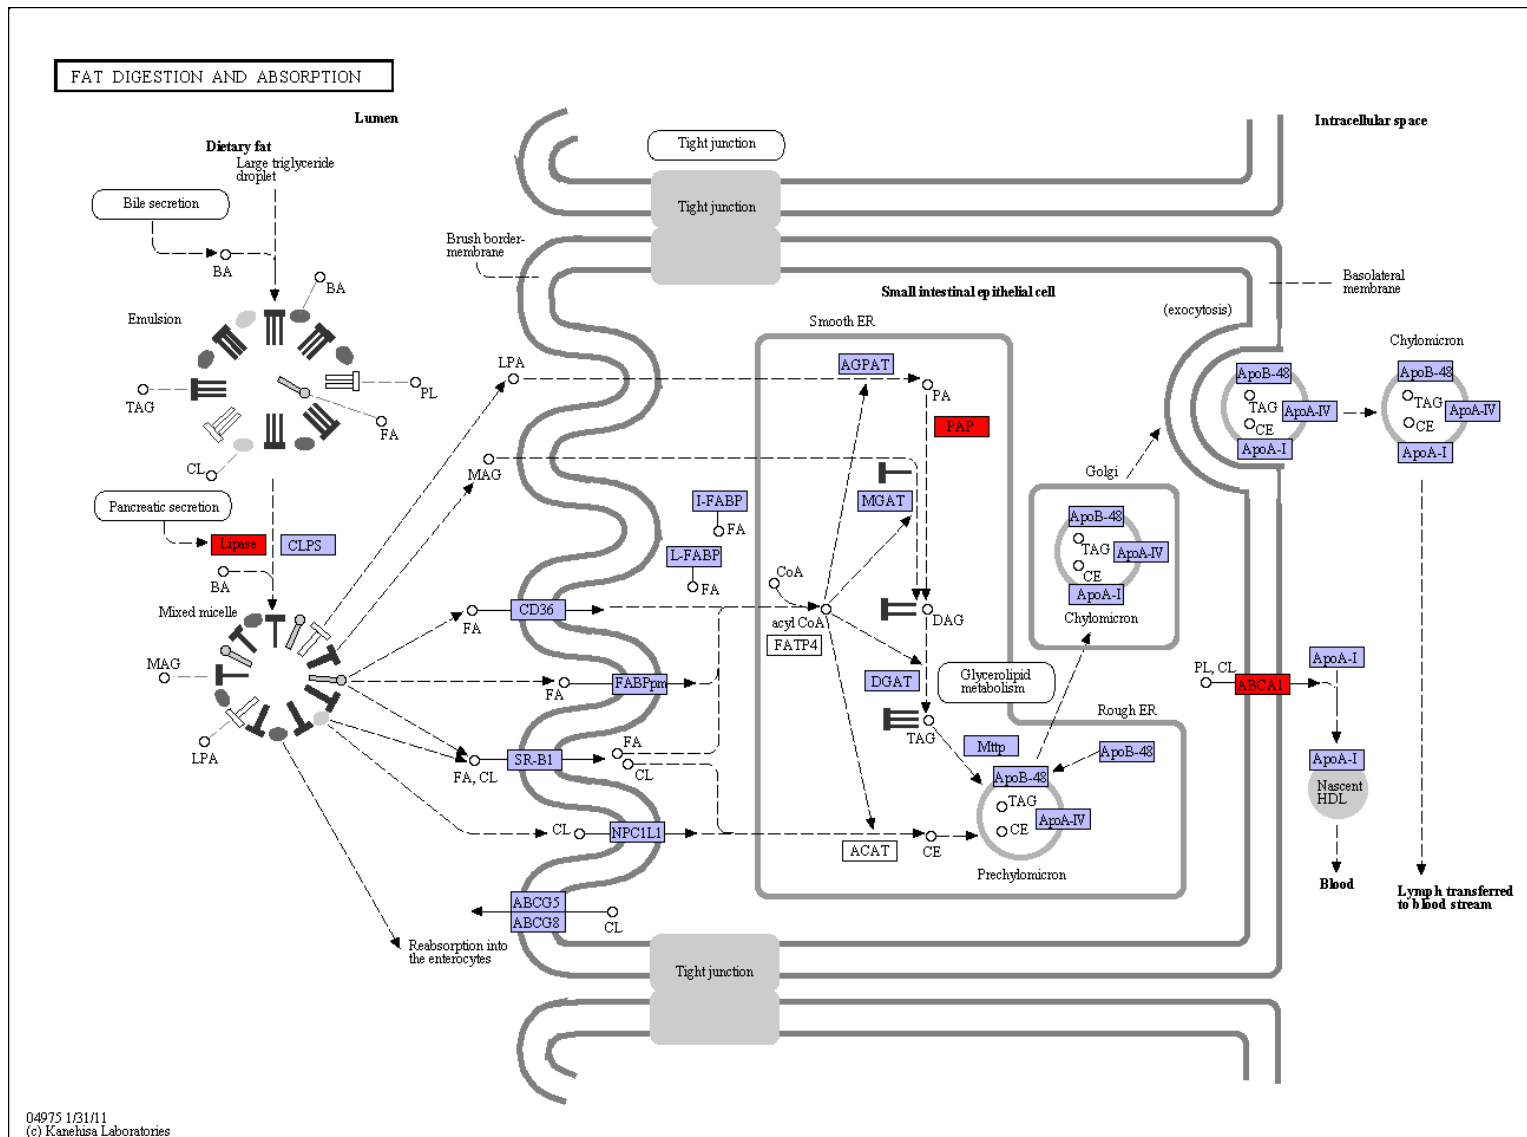

Figure 221: ko04975 Fat digestion and absorption

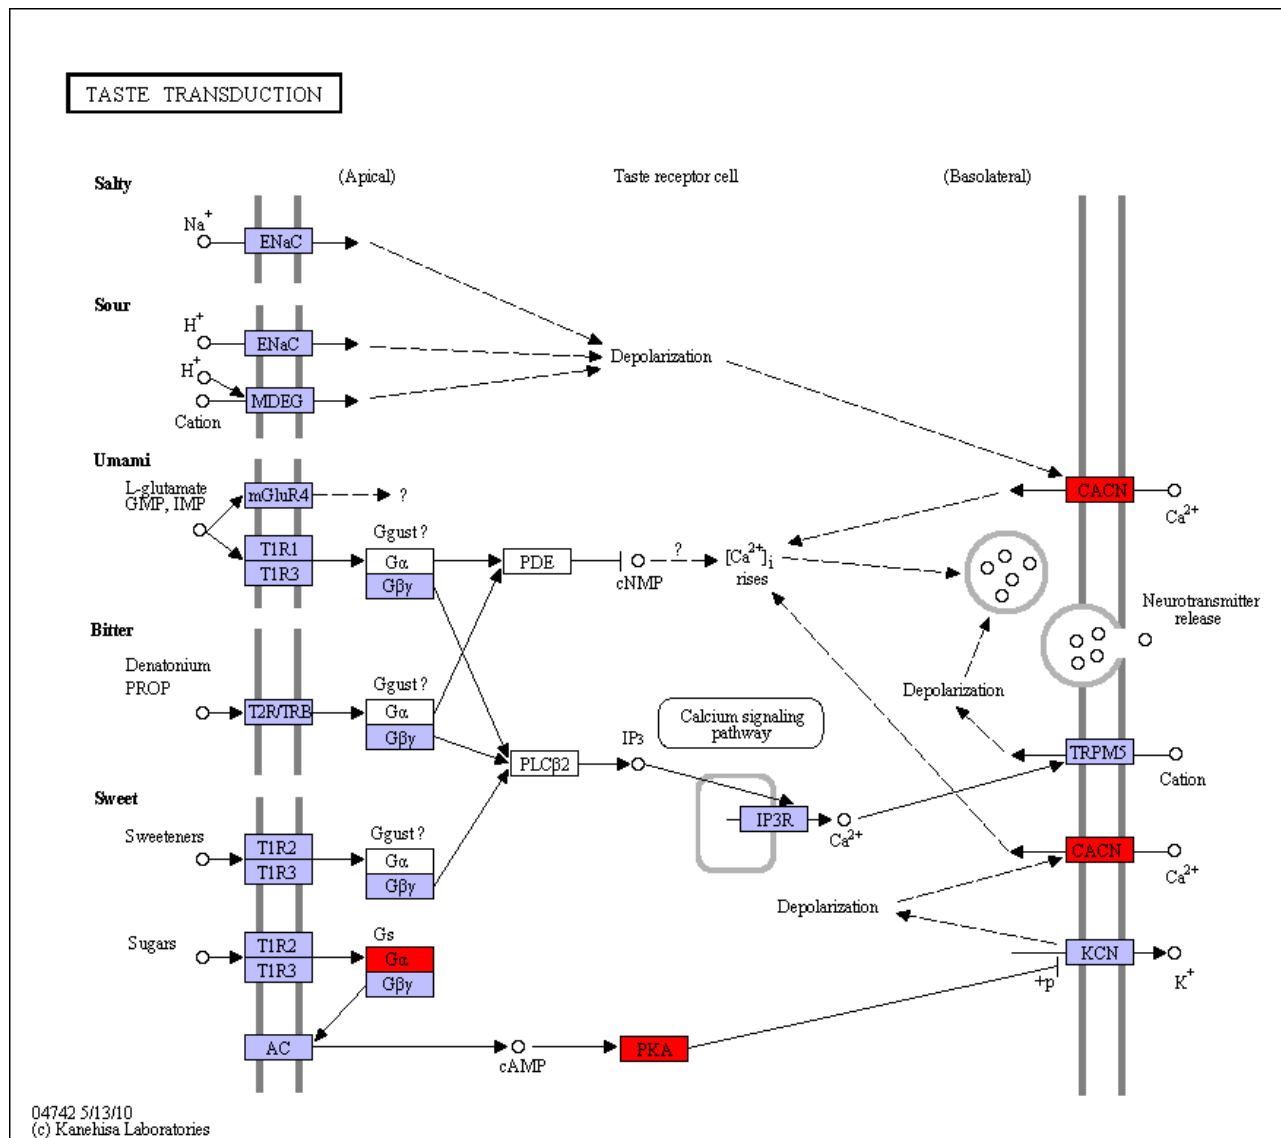

Figure 222: ko04742 Taste transduction

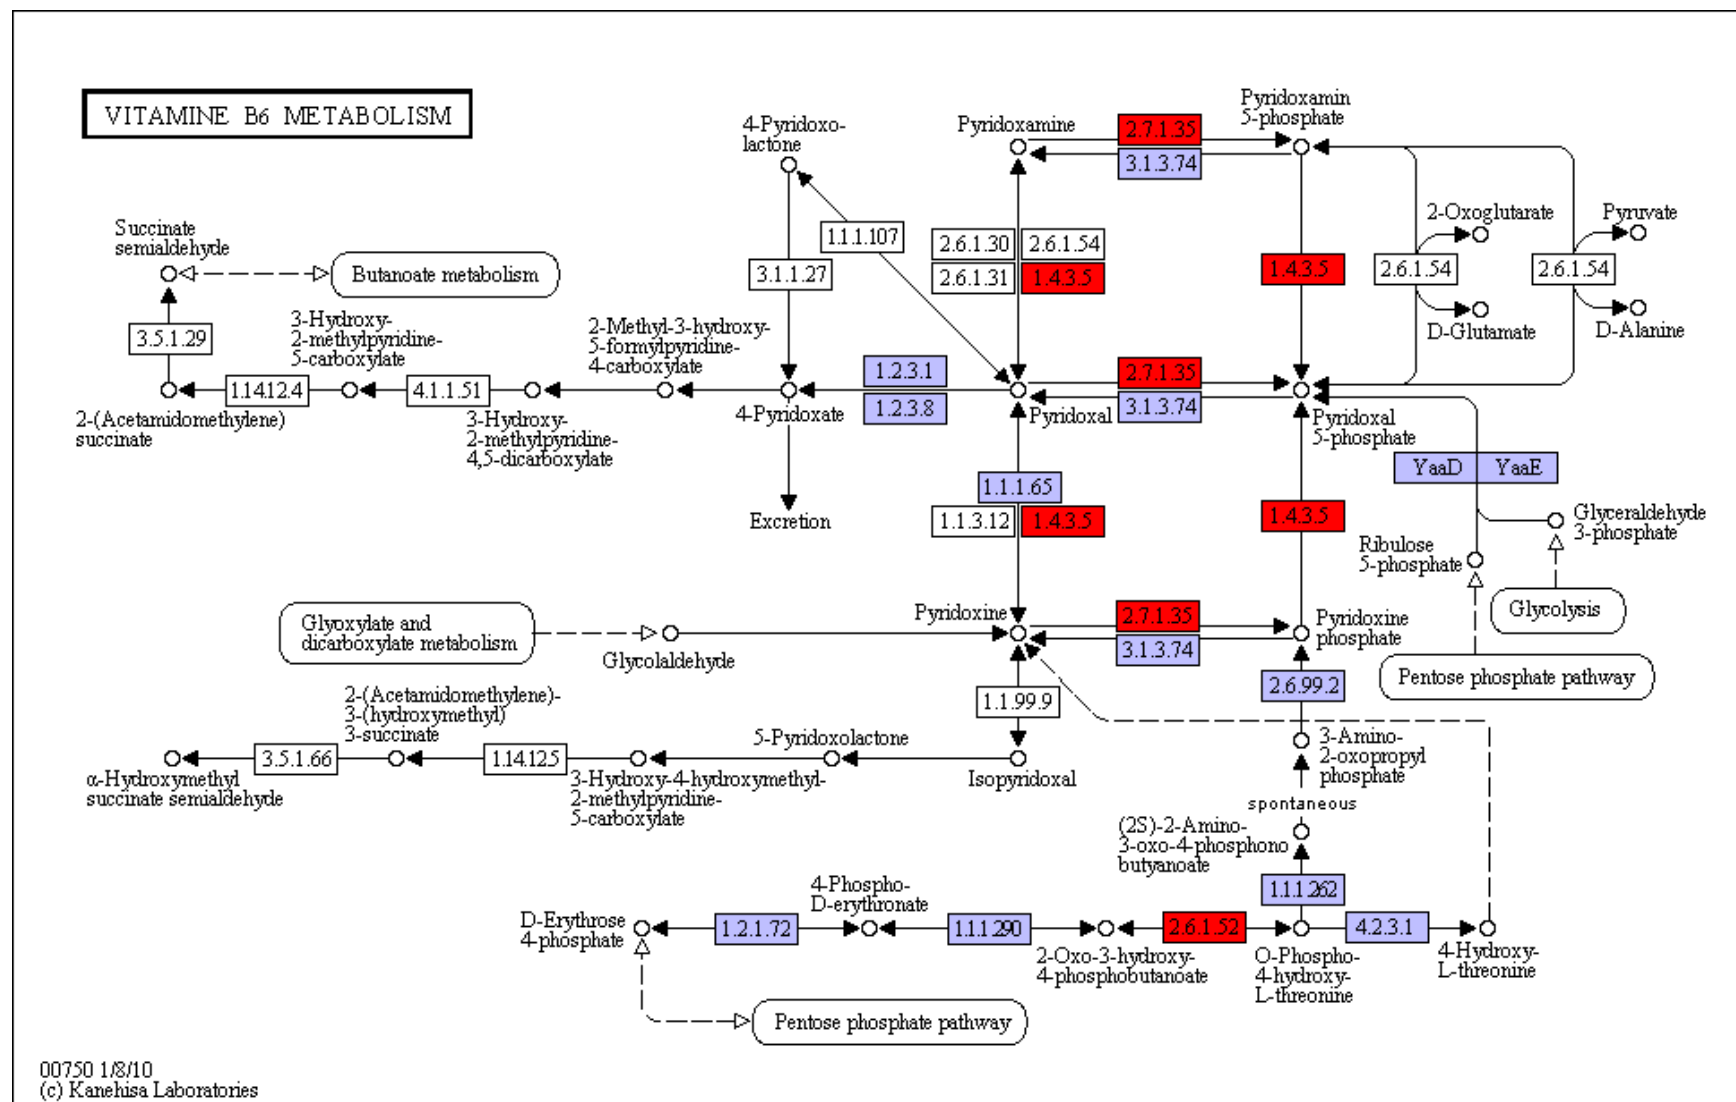

Figure 223: ko00750 Vitamin B6 metabolism



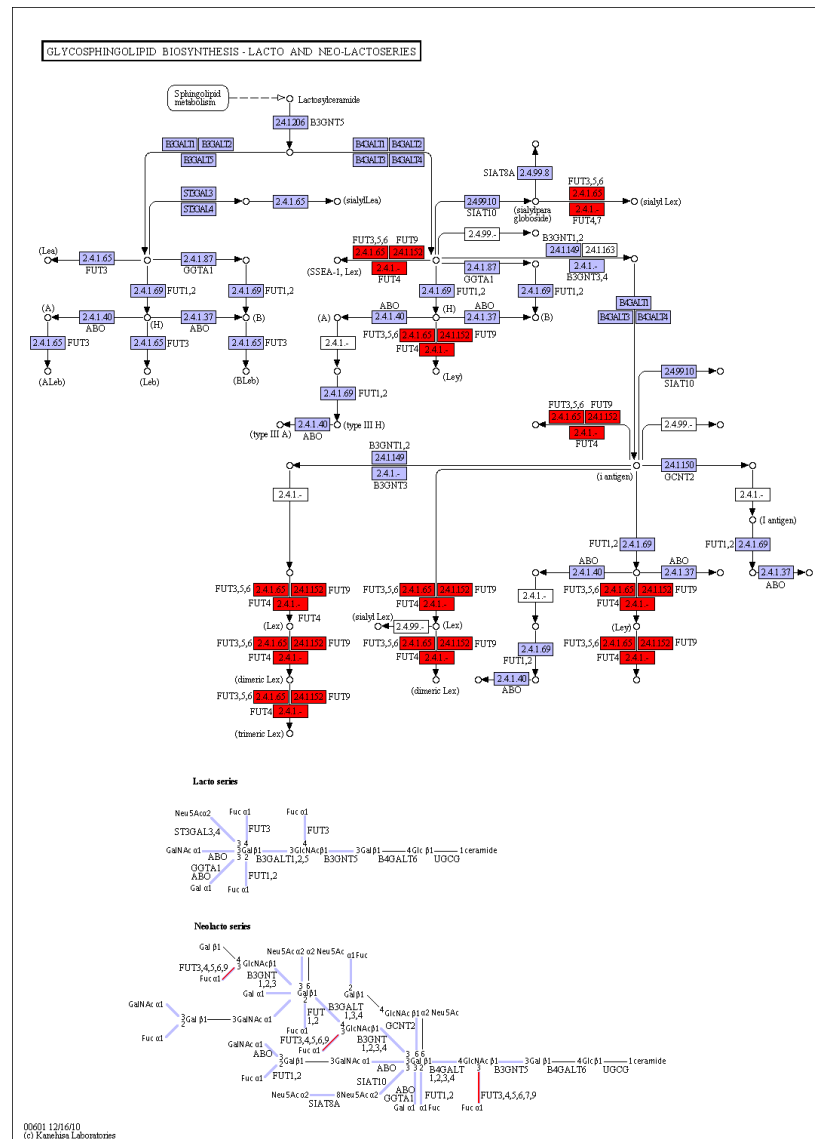

Figure 224: ko00601 Glycosphingolipid biosynthesis - lacto and neolacto series



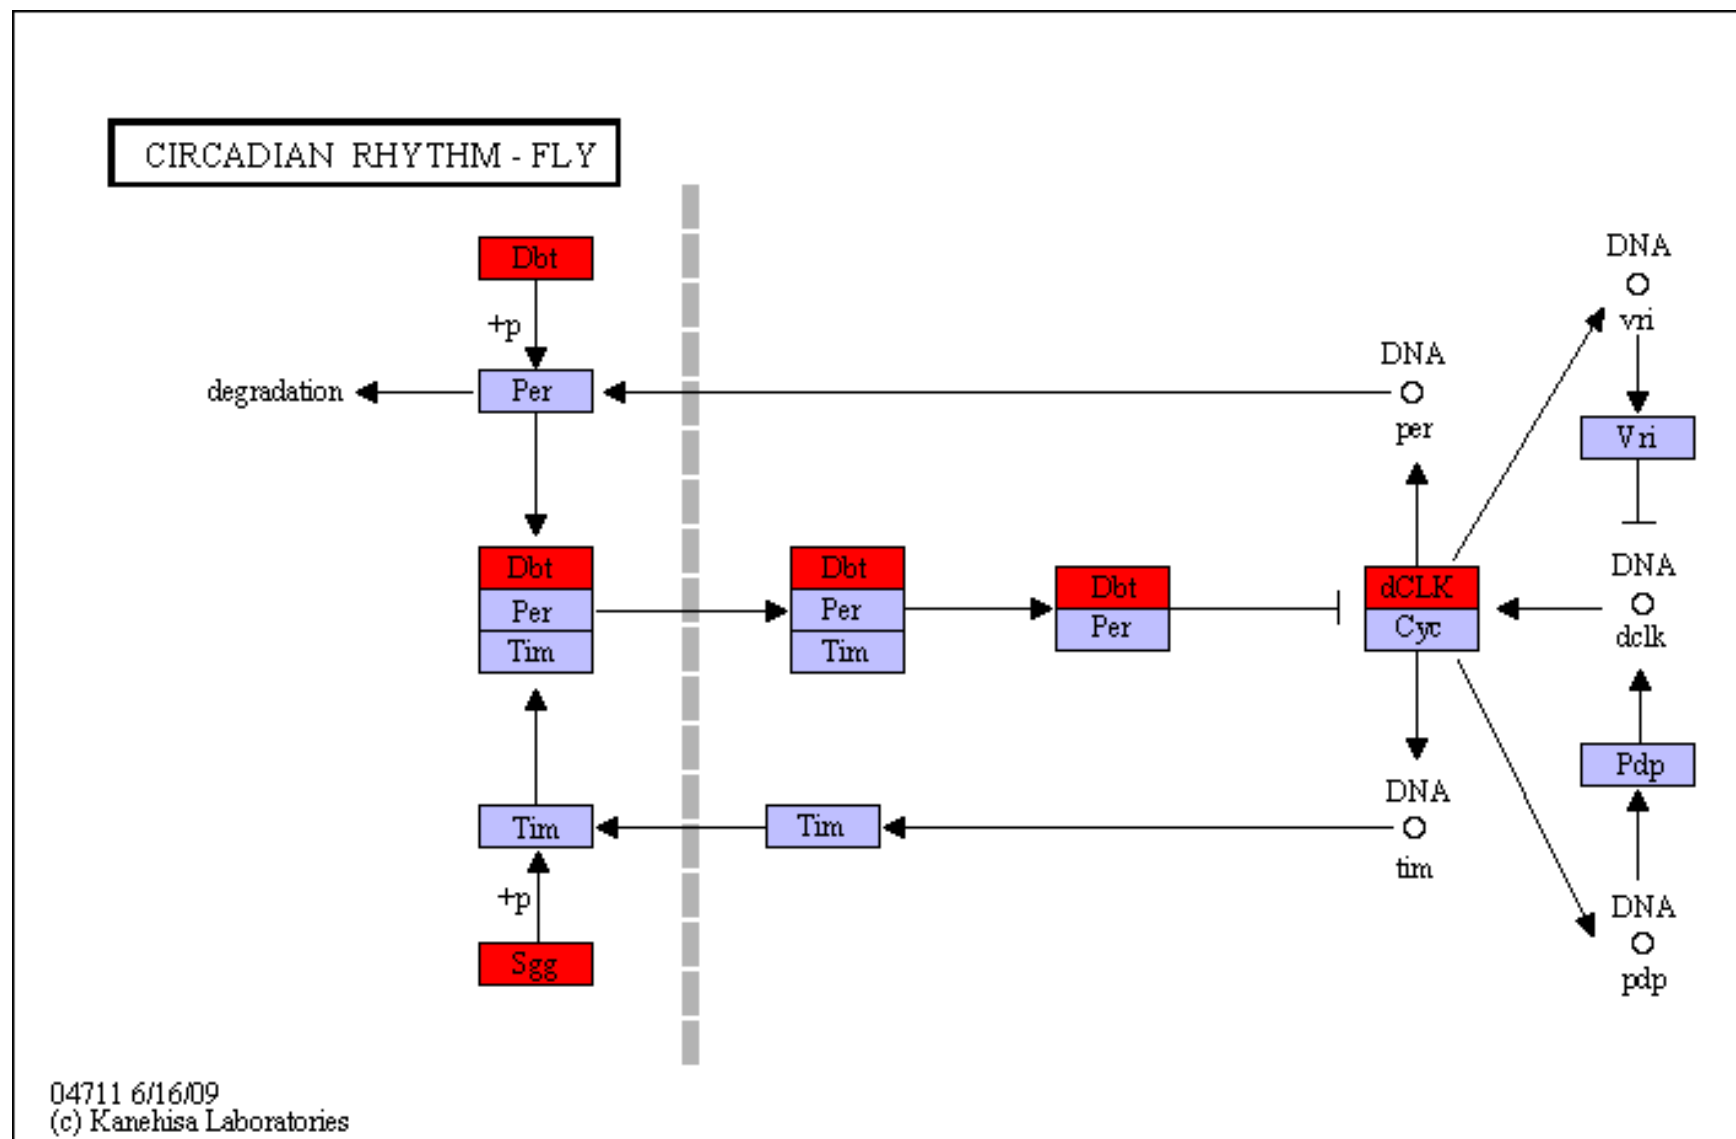

Figure 226: ko04711 Circadian rhythm - fly

## LIPOIC ACID METABOLISM

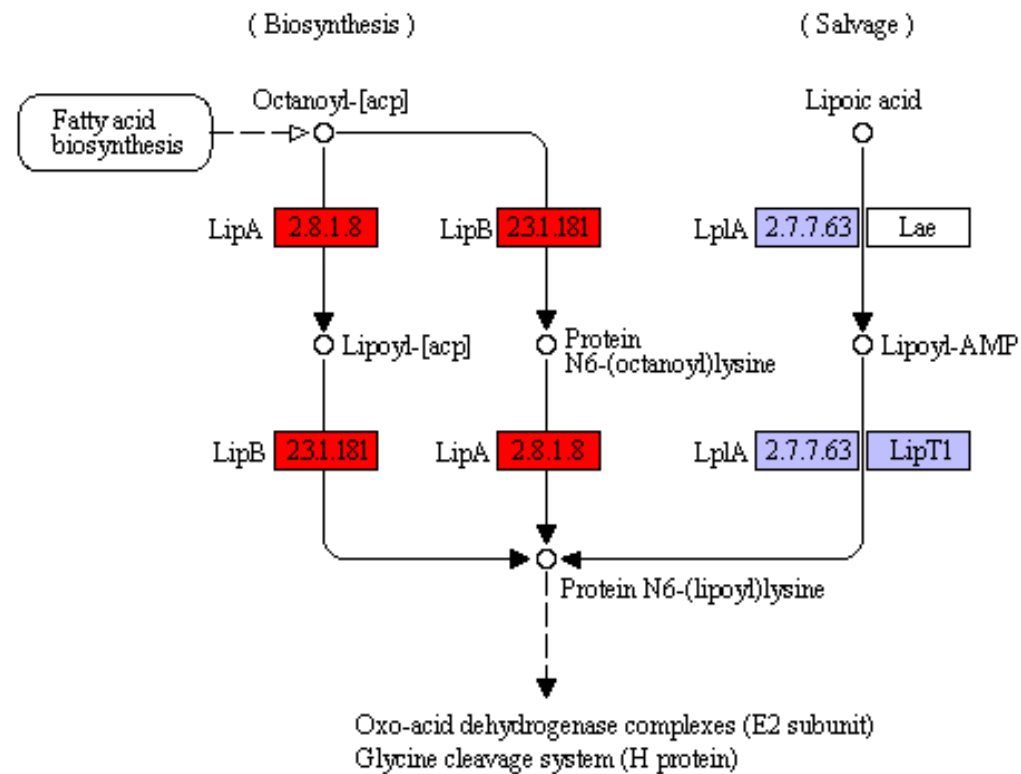

00785 10/1/09  
 (c) Kanehisa Laboratories

Figure 227: ko00785 Lipoic acid metabolism



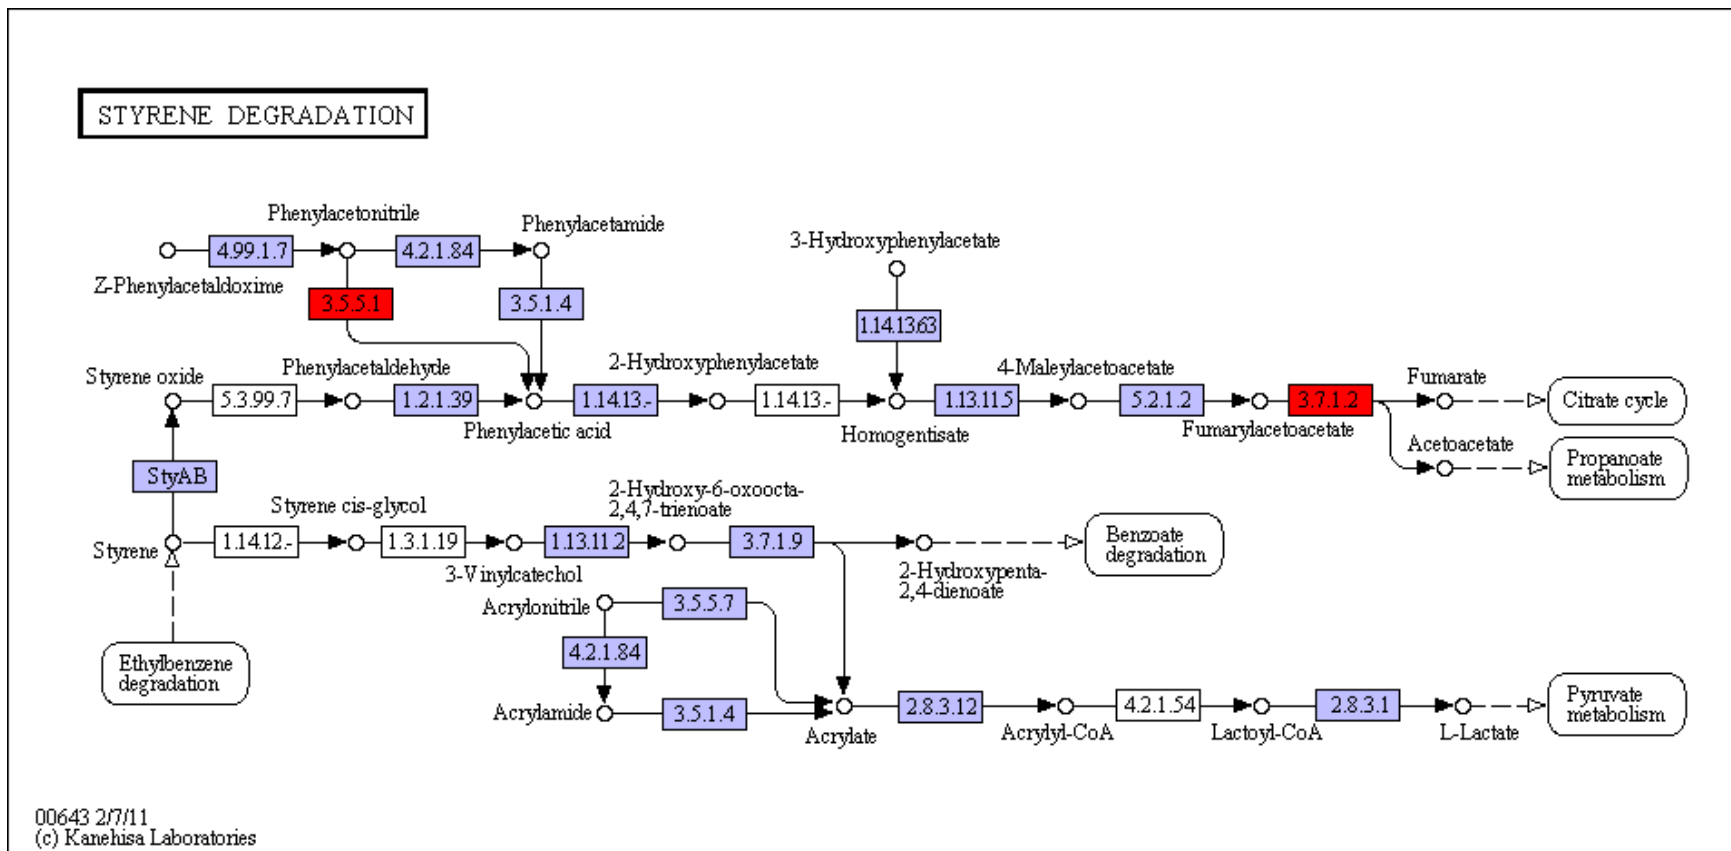

Figure 229: ko00643 Styrene degradation

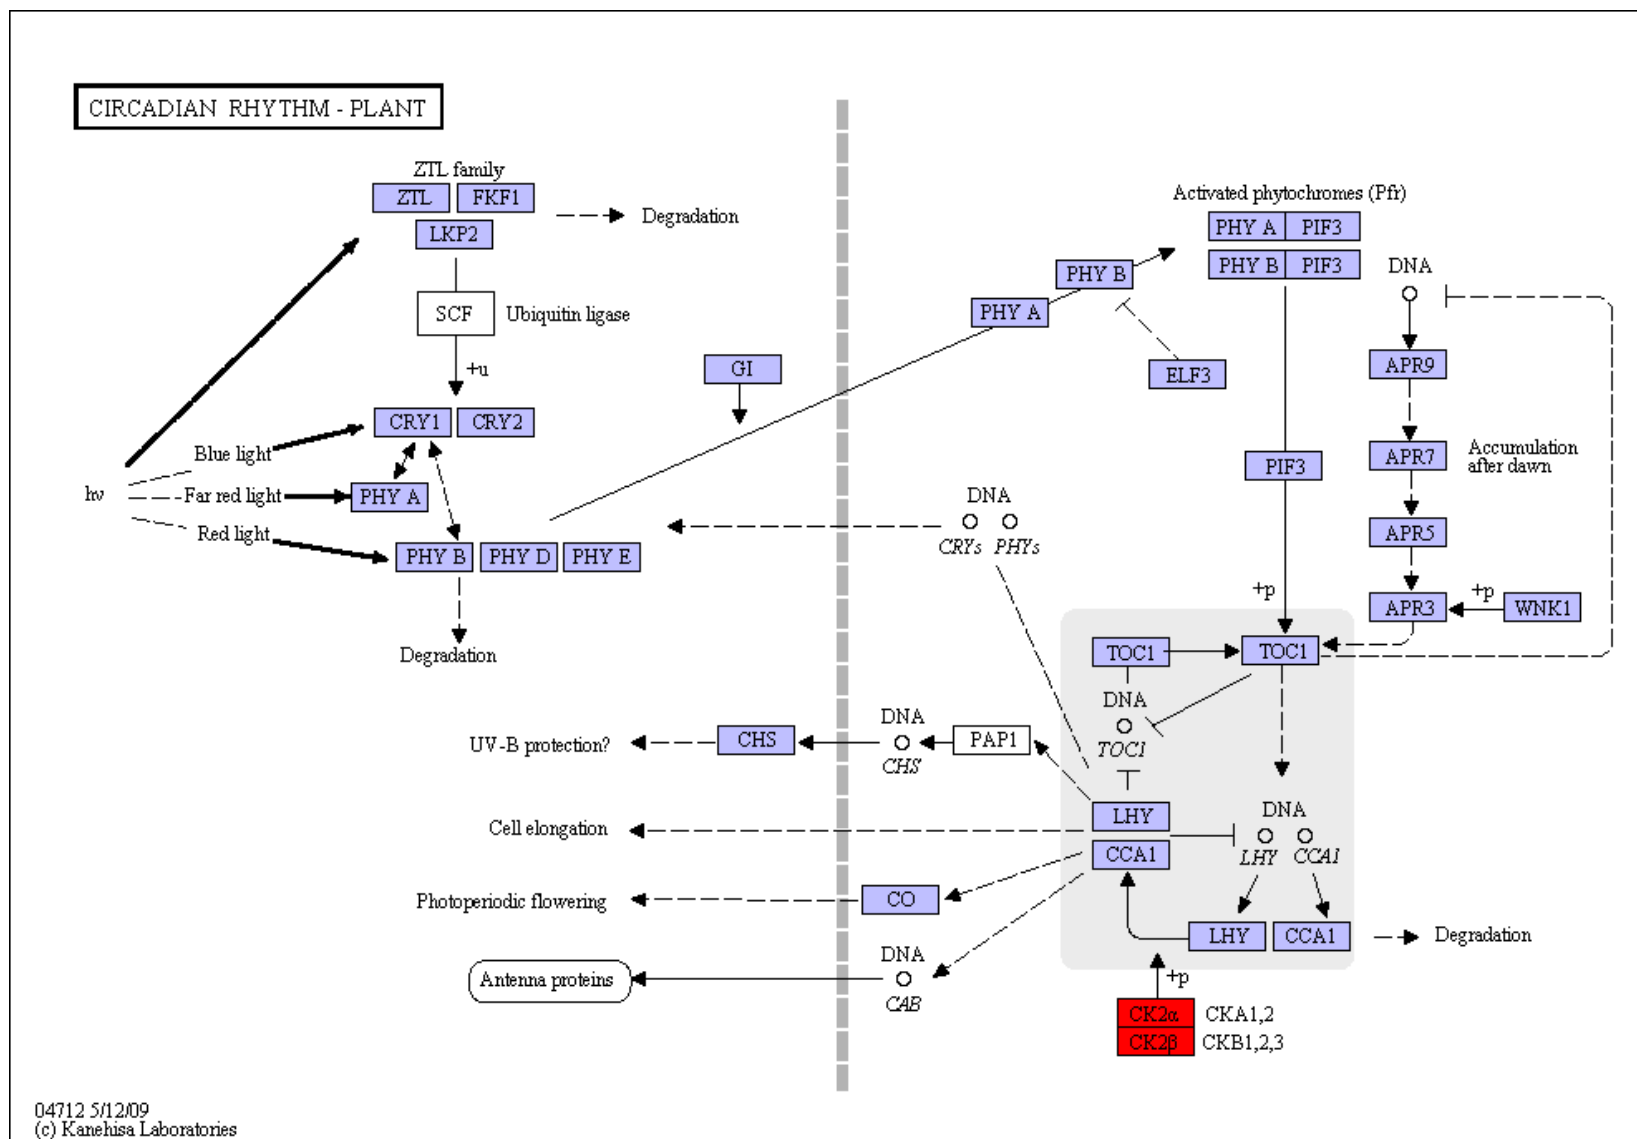

Figure 230: ko04712 Circadian rhythm - plant

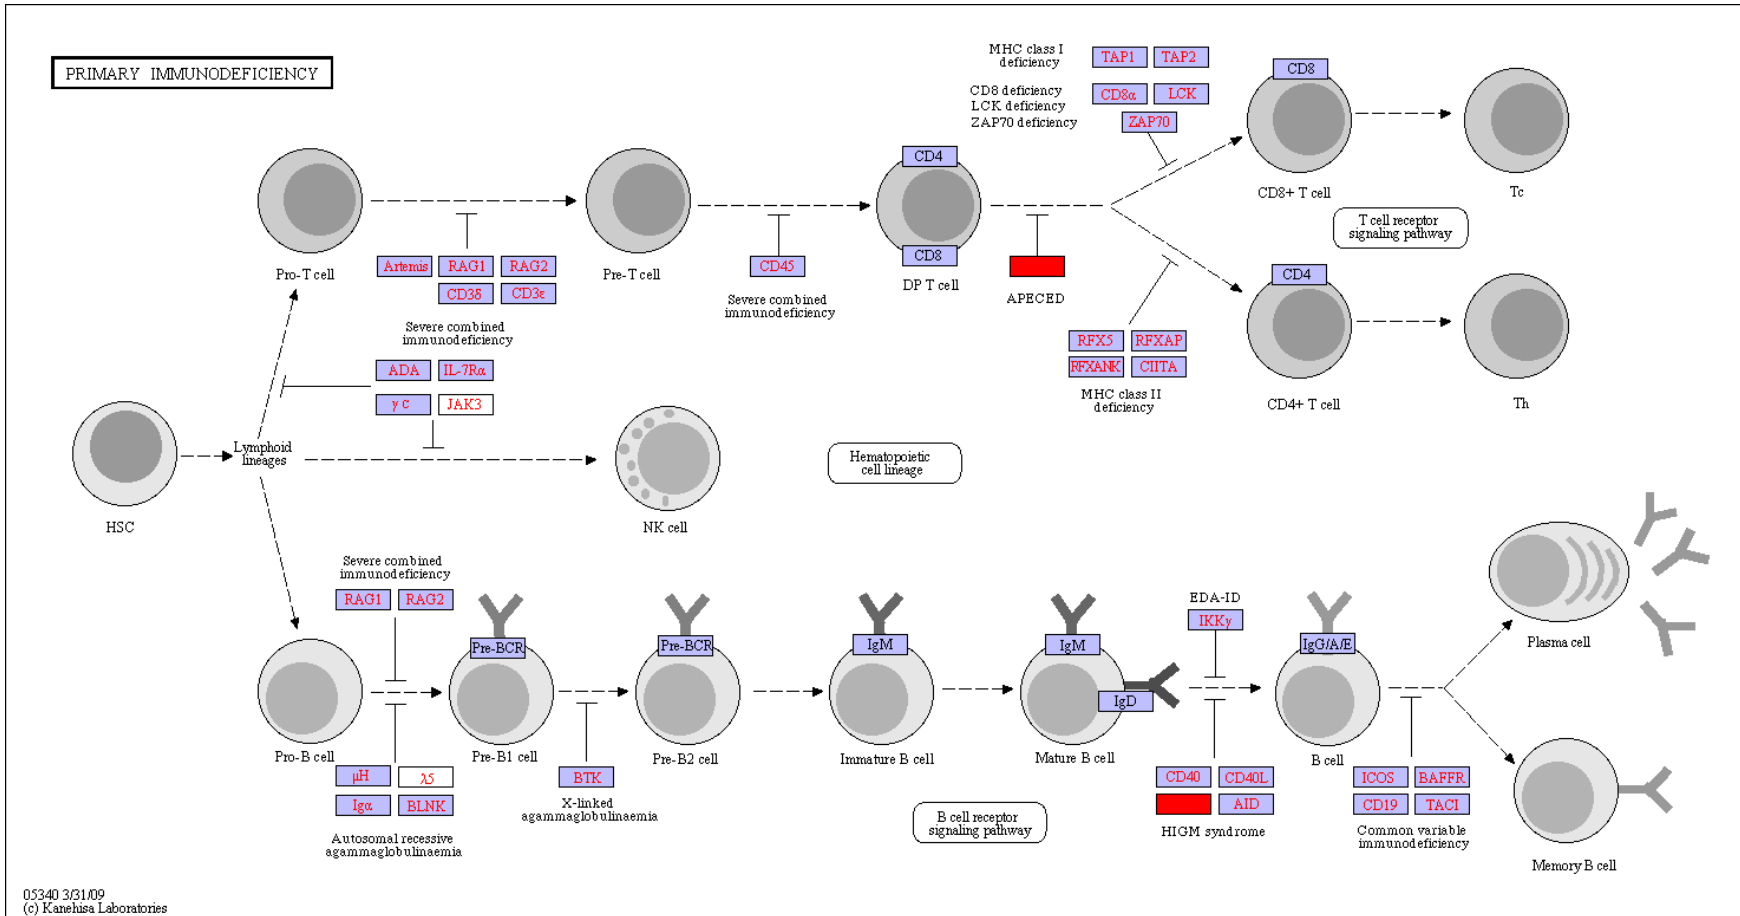

Figure 231: ko05340 Primary immunodeficiency



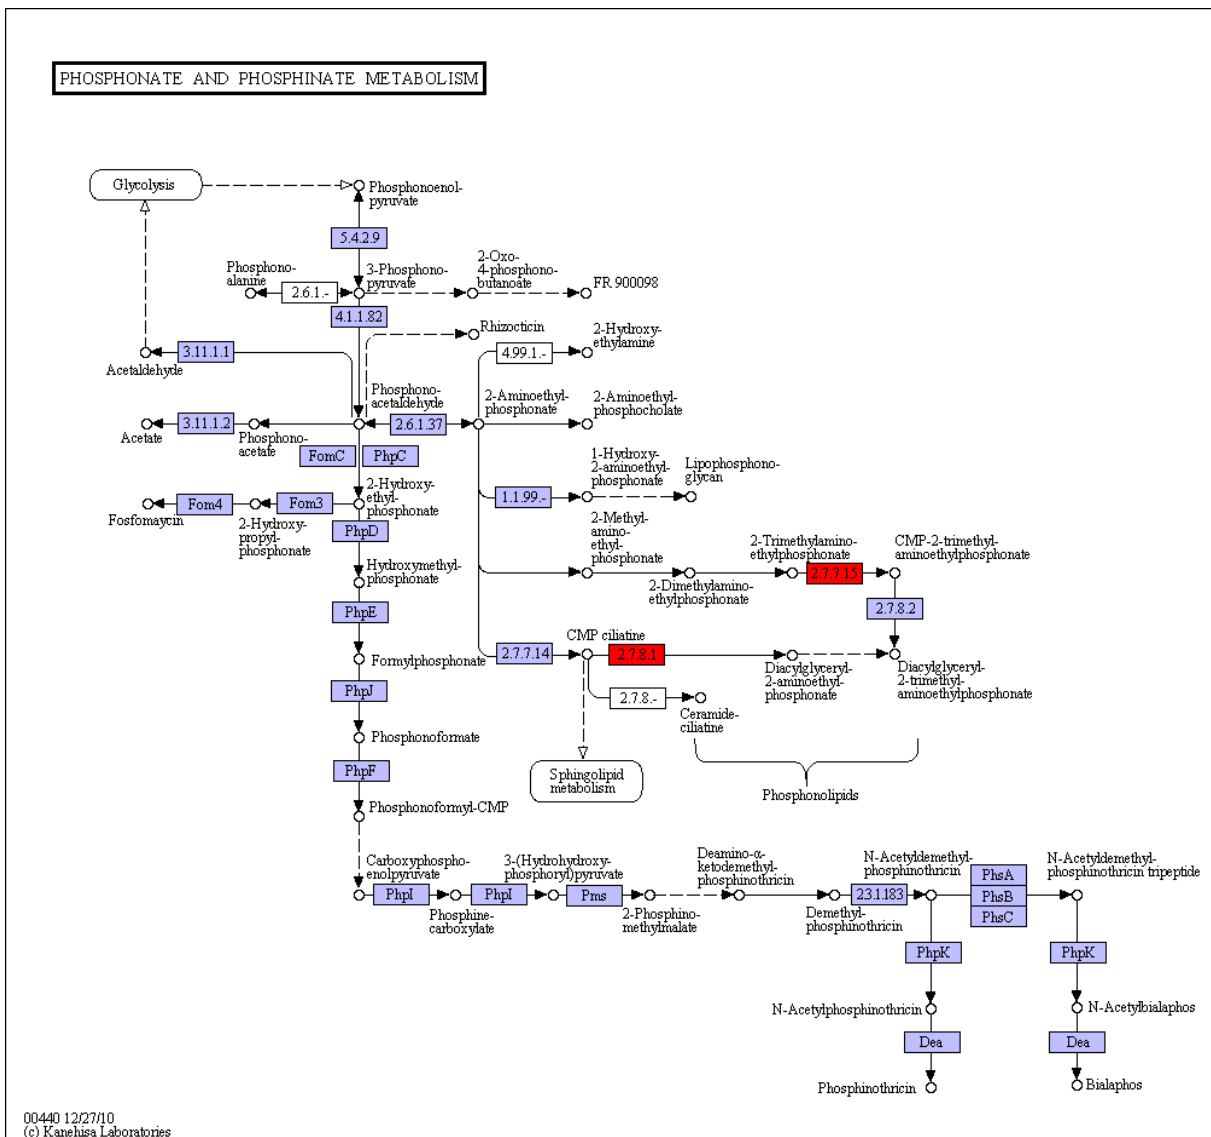

Figure 232: ko00440 Phosphonate and phosphinate metabolism



# BIOTIN METABOLISM

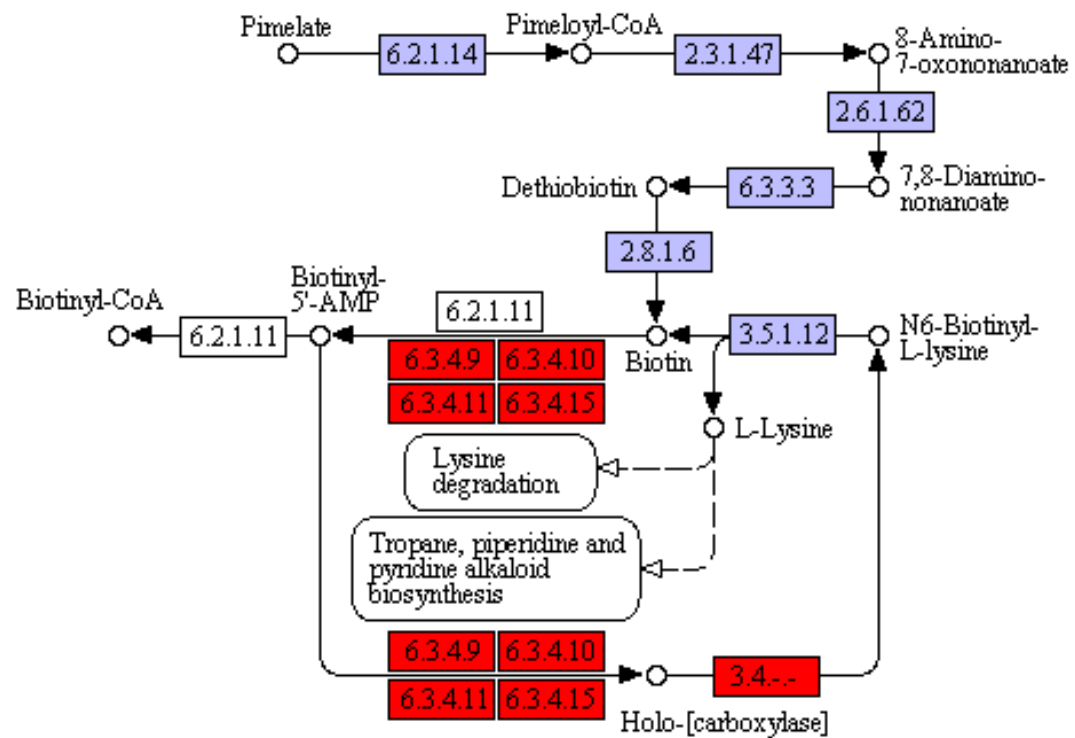

00780 2/2/11  
 (c) Kanehisa Laboratories

Figure 234: ko00780 Biotin metabolism

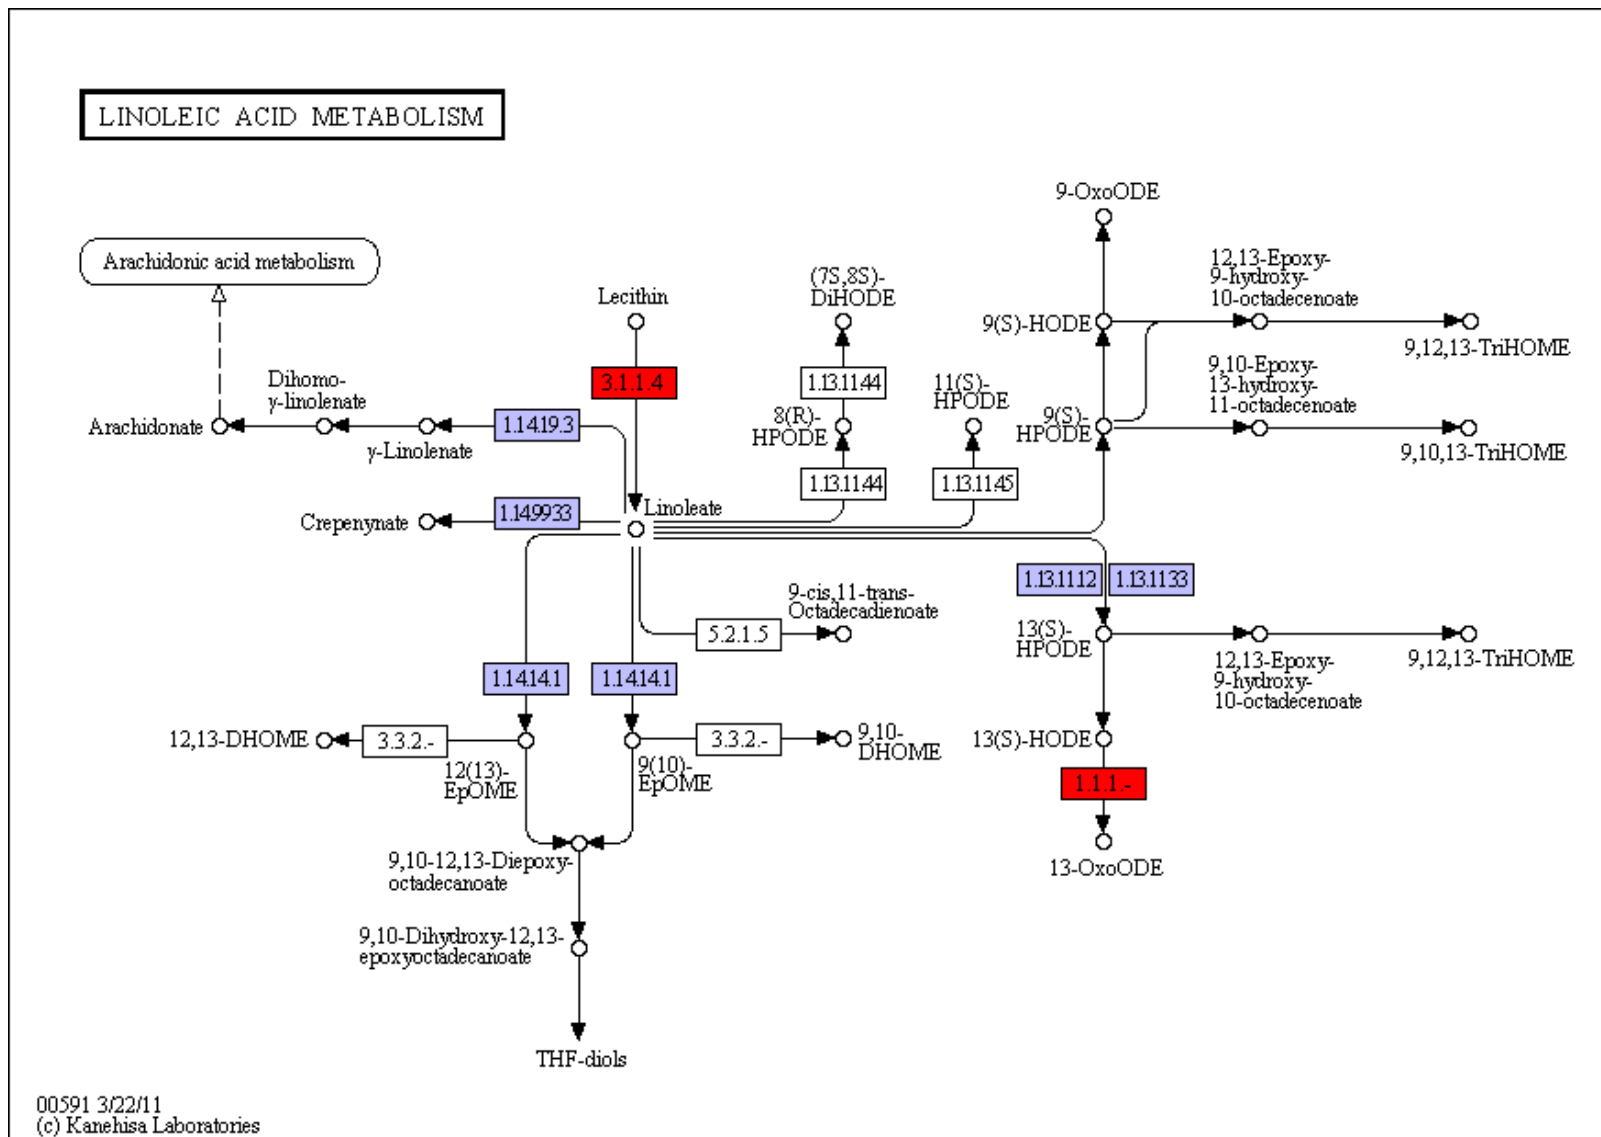

Figure 235: ko00591 Linoleic acid metabolism

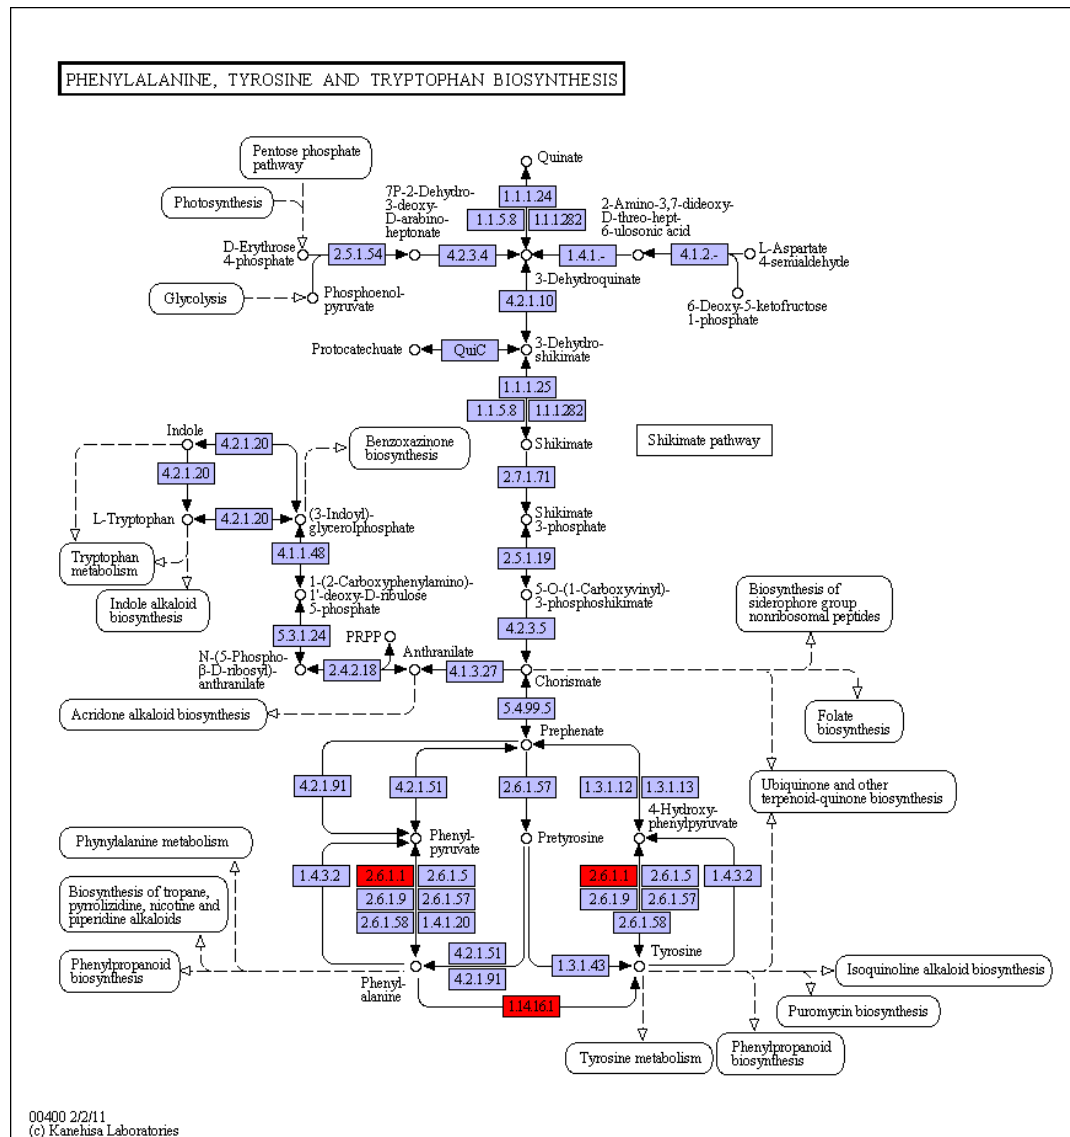

Figure 236: ko00400 Phenylalanine, tyrosine and tryptophan biosynthesis

# BETALAIN BIOSYNTHESIS

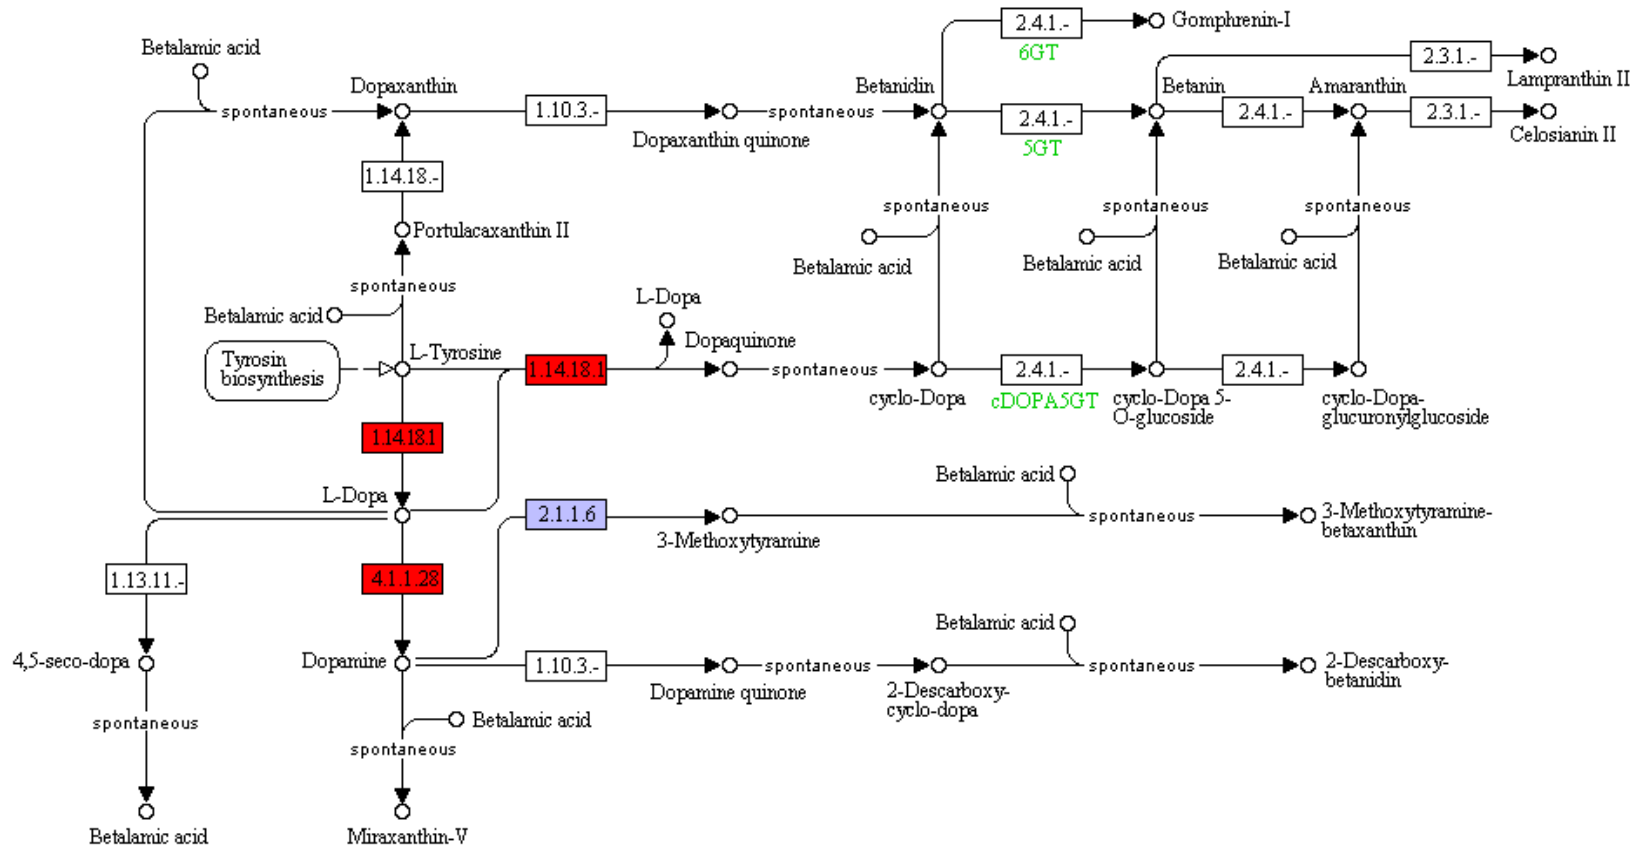

00965 9/3/09  
(c) Kanehisa Laboratories

Figure 237: ko00965 Betalain biosynthesis

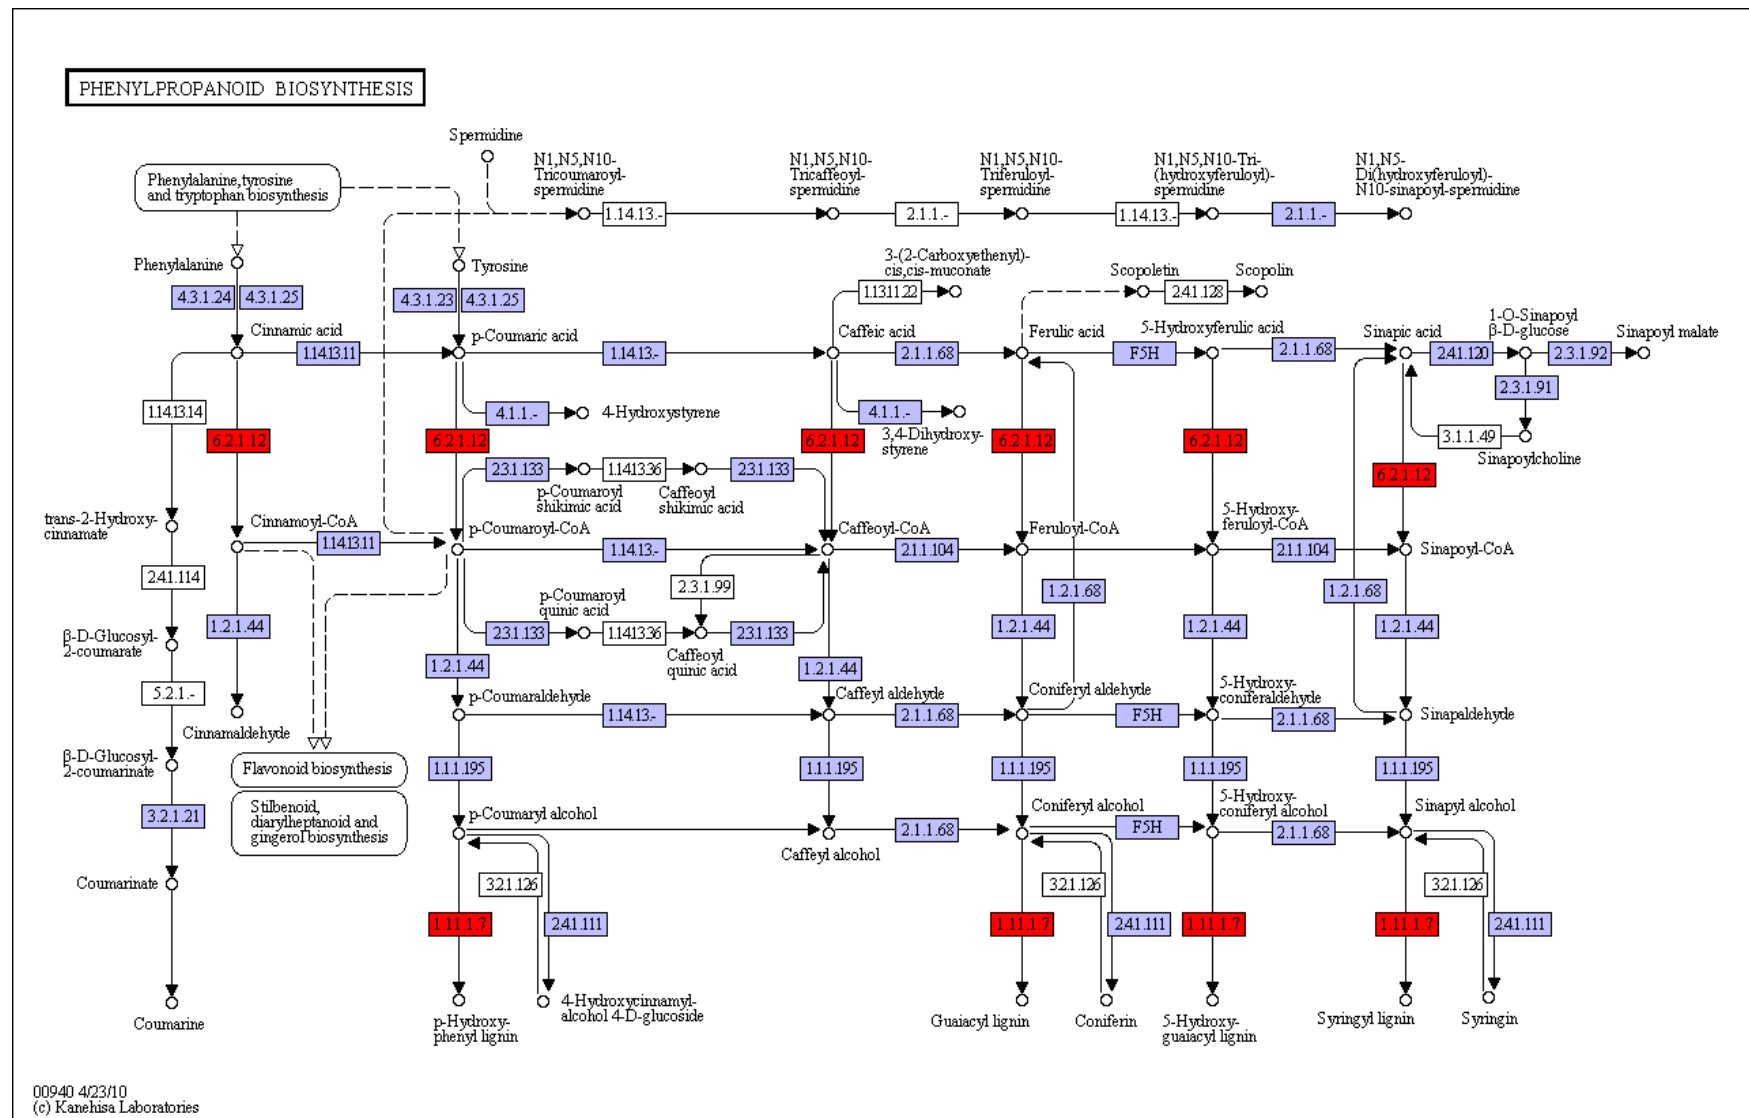

Figure 238: ko00940 Phenylpropanoid biosynthesis

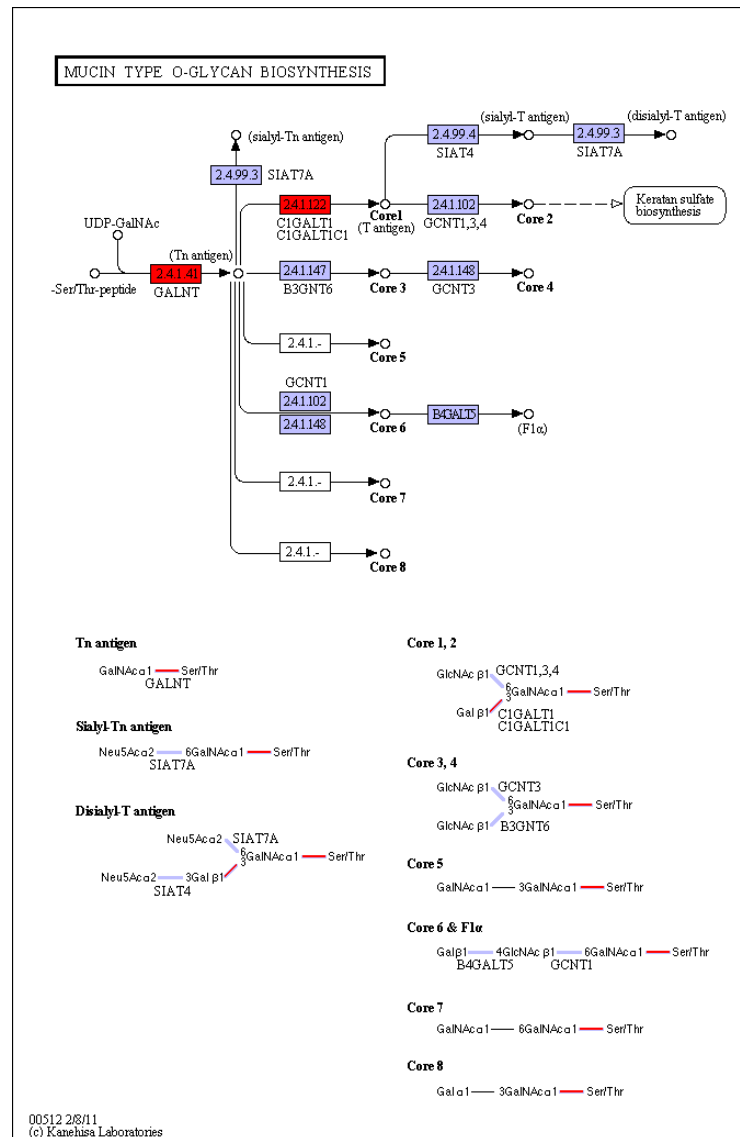

Figure 239: ko00512 Mucin type O-Glycan biosynthesis



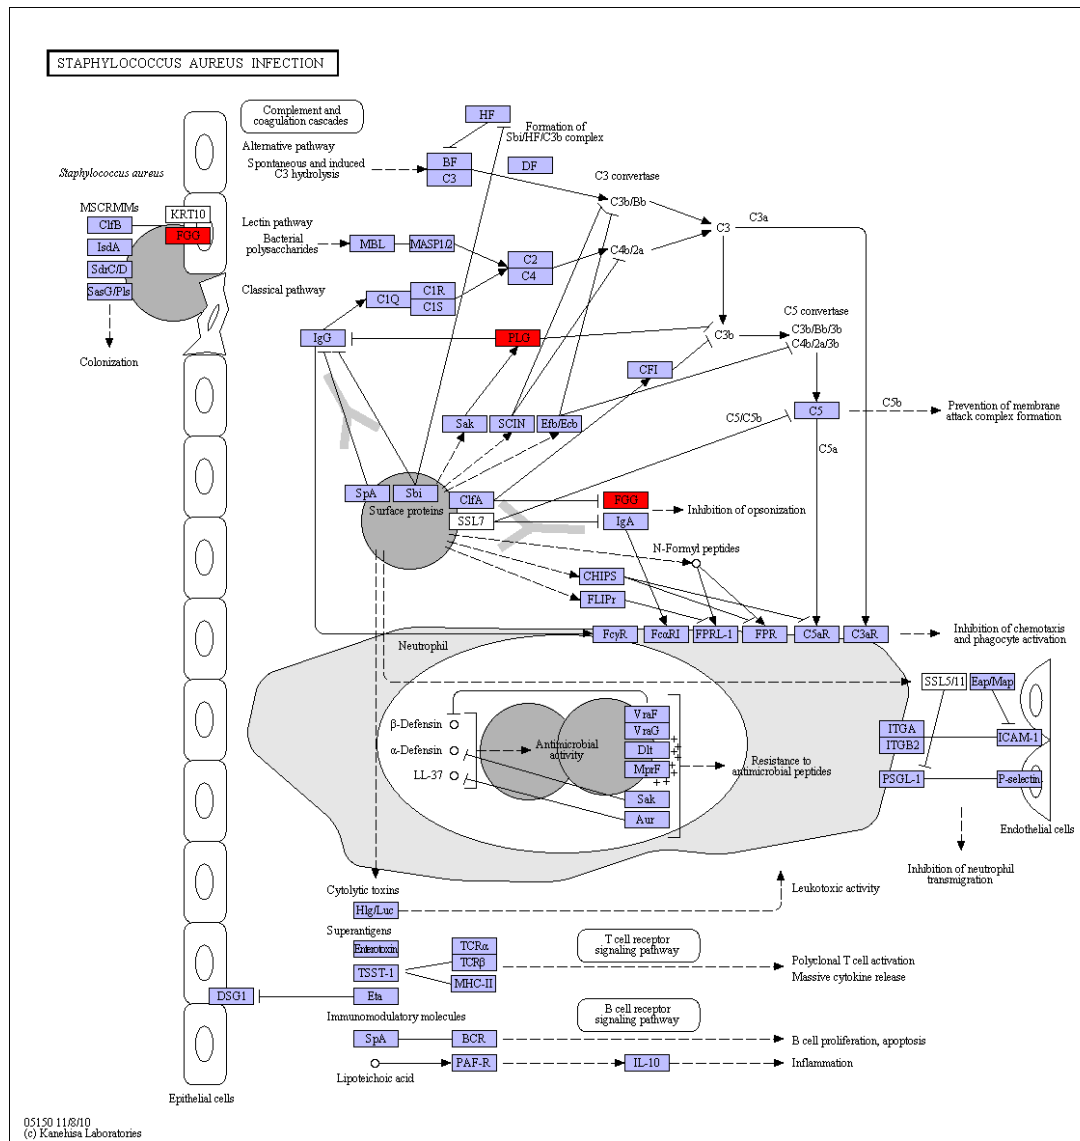

Figure 240: ko05150 Staphylococcus aureus infection

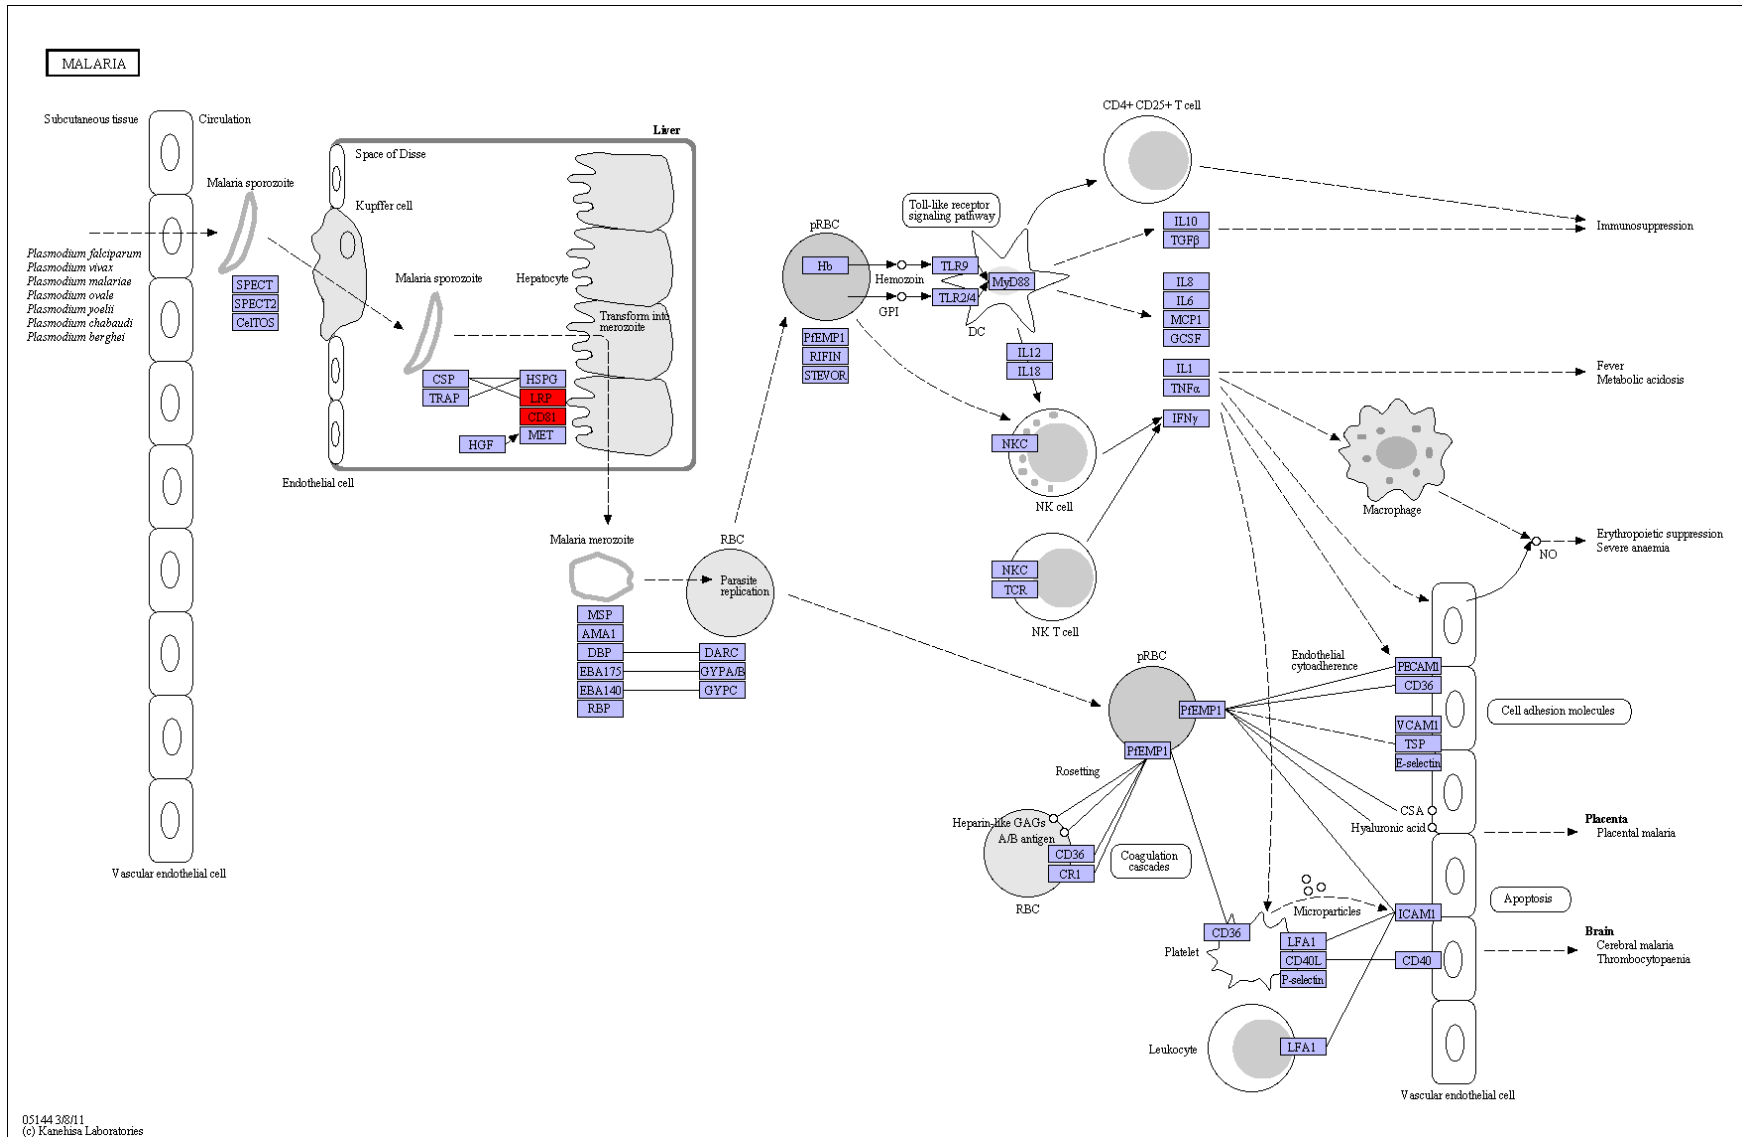

05144 3/8/11  
 (c) Kanehisa Laboratories

Figure 241: ko05144 Malaria



## D-GLUTAMINE AND D-GLUTAMATE METABOLISM

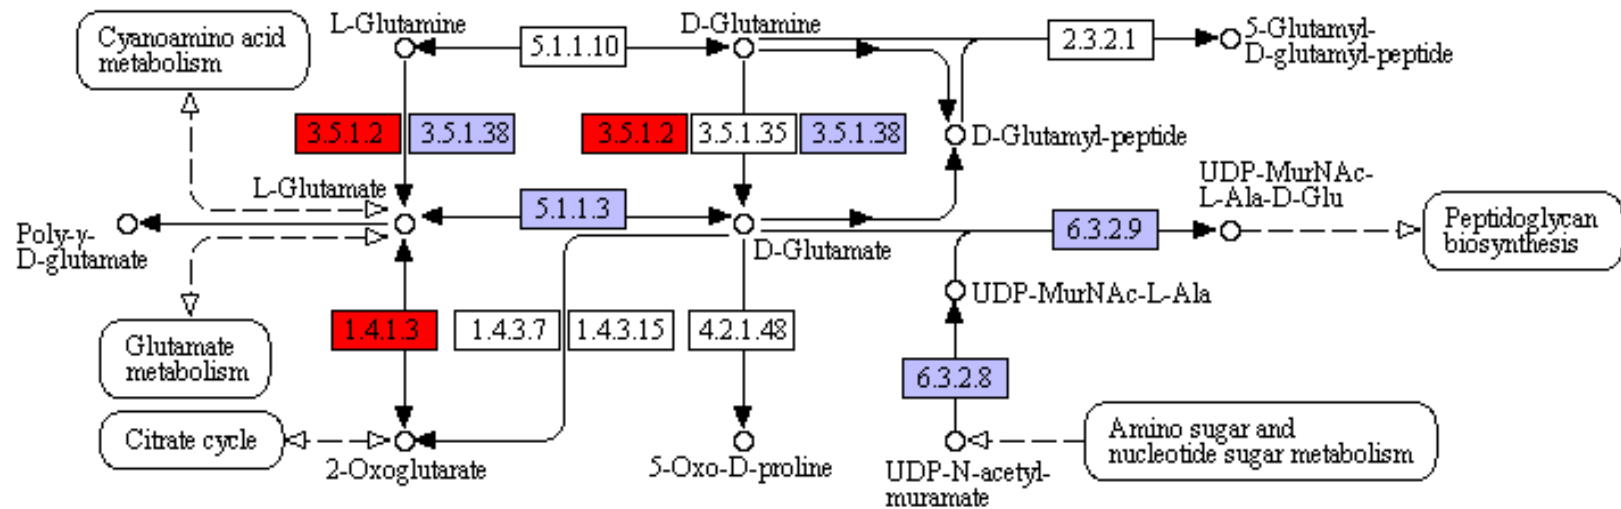

00471 3/14/11  
(c) Kanehisa Laboratories

Figure 243: ko00471 D-Glutamine and D-glutamate metabolism



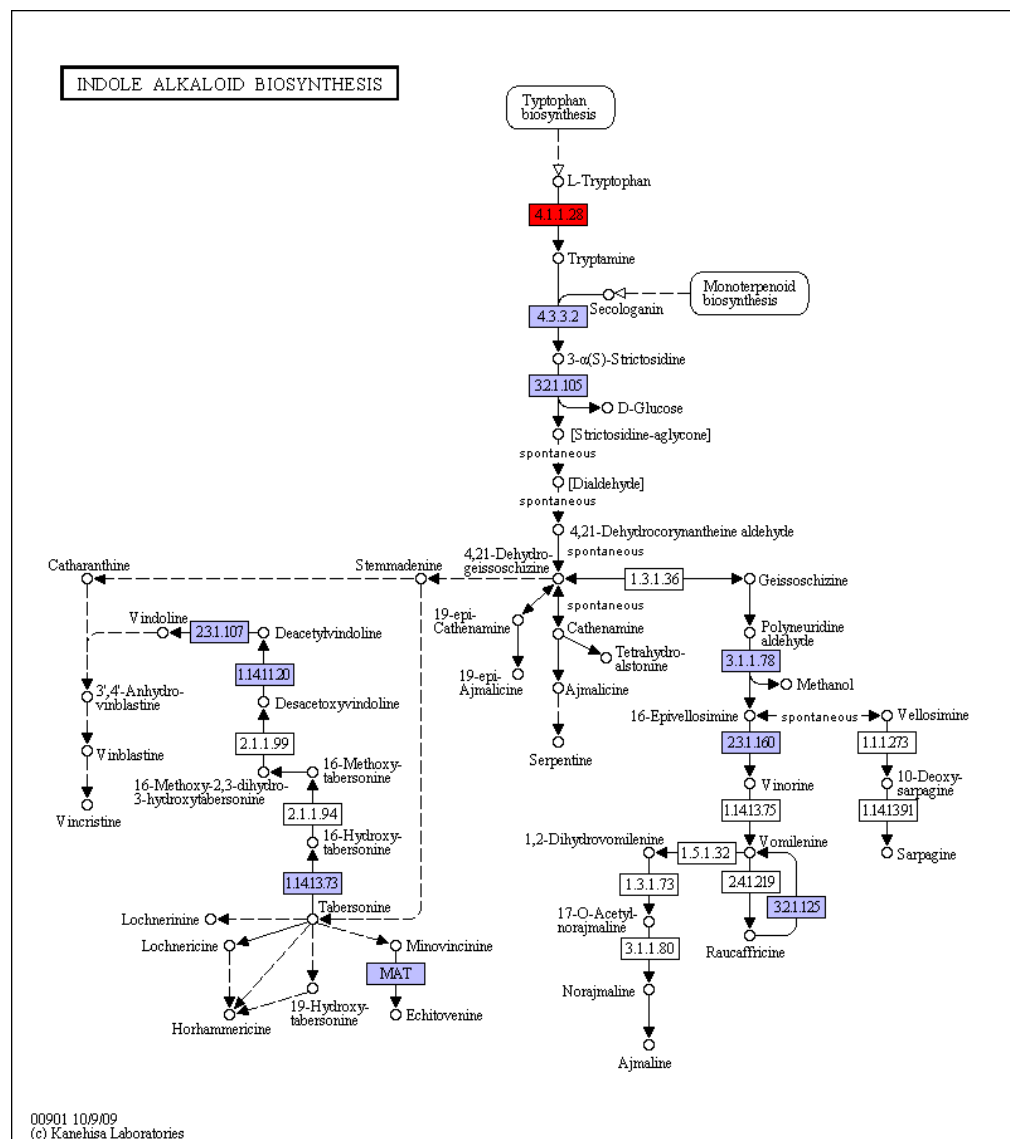

Figure 245: ko00901 Indole alkaloid biosynthesis

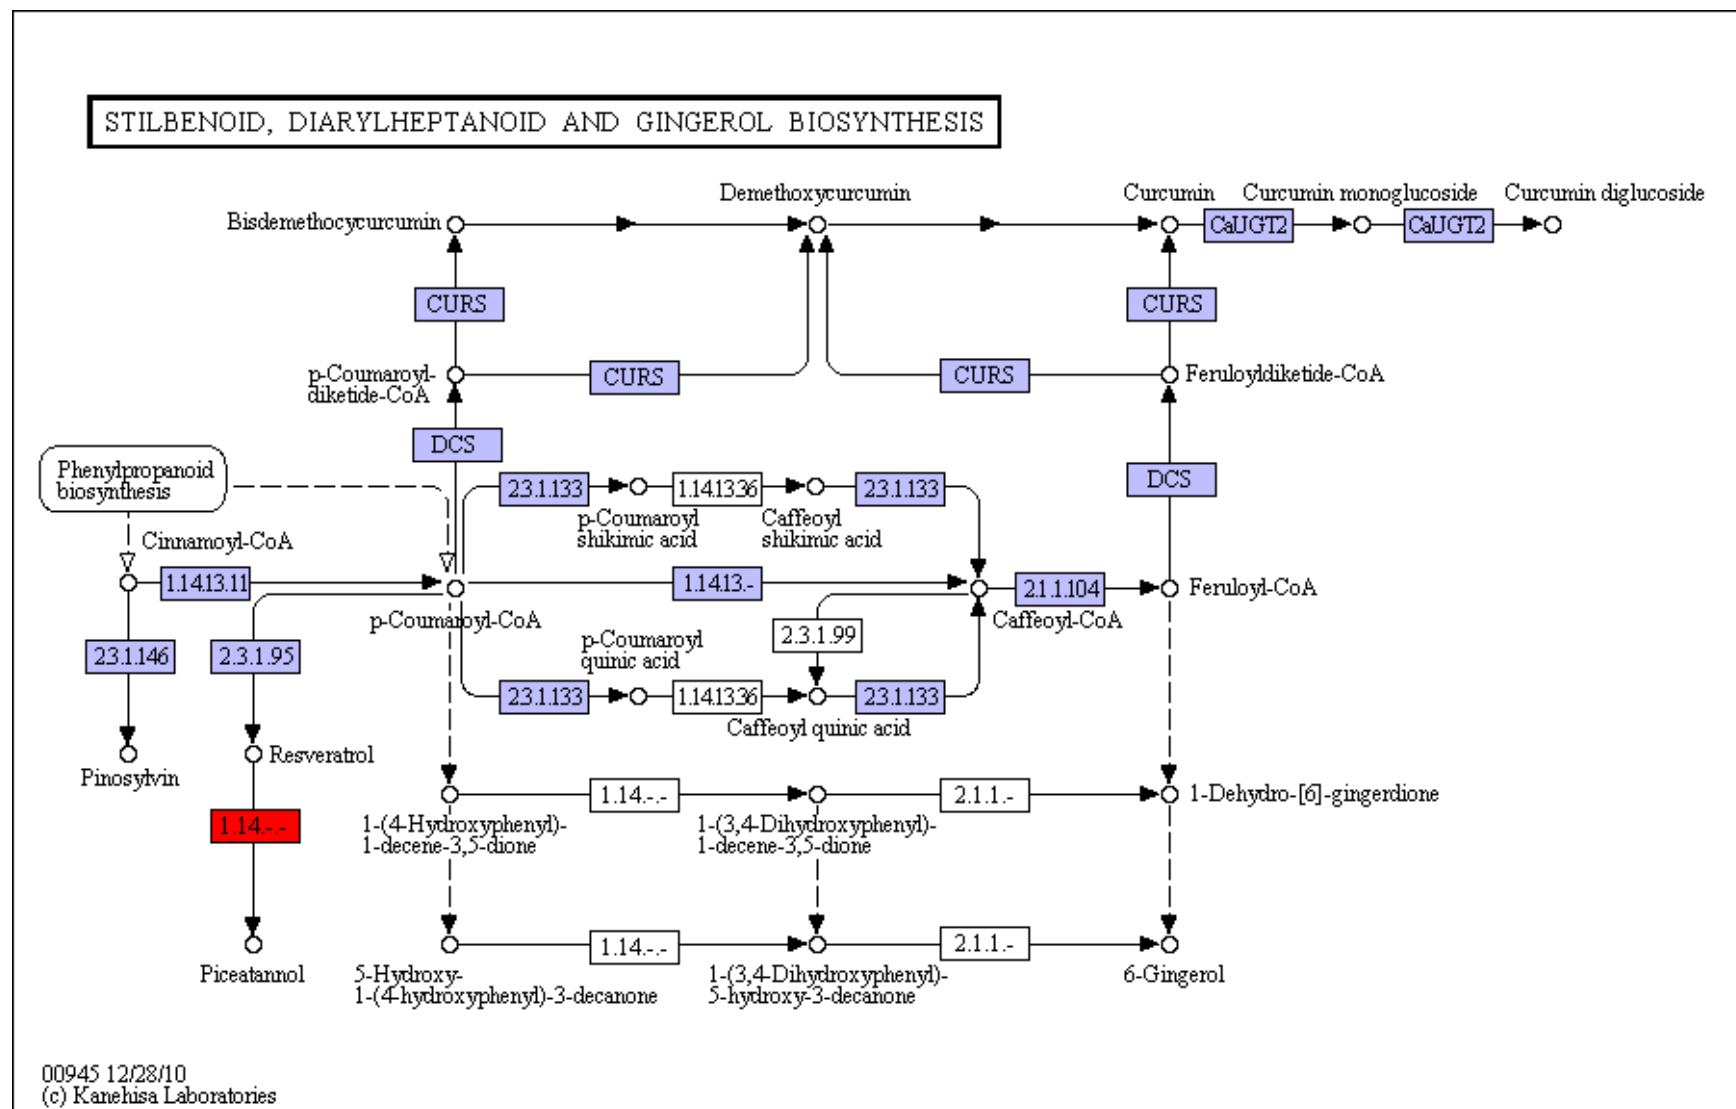

Figure 246: ko00945 Stilbenoid, diarylheptanoid and gingerol biosynthesis

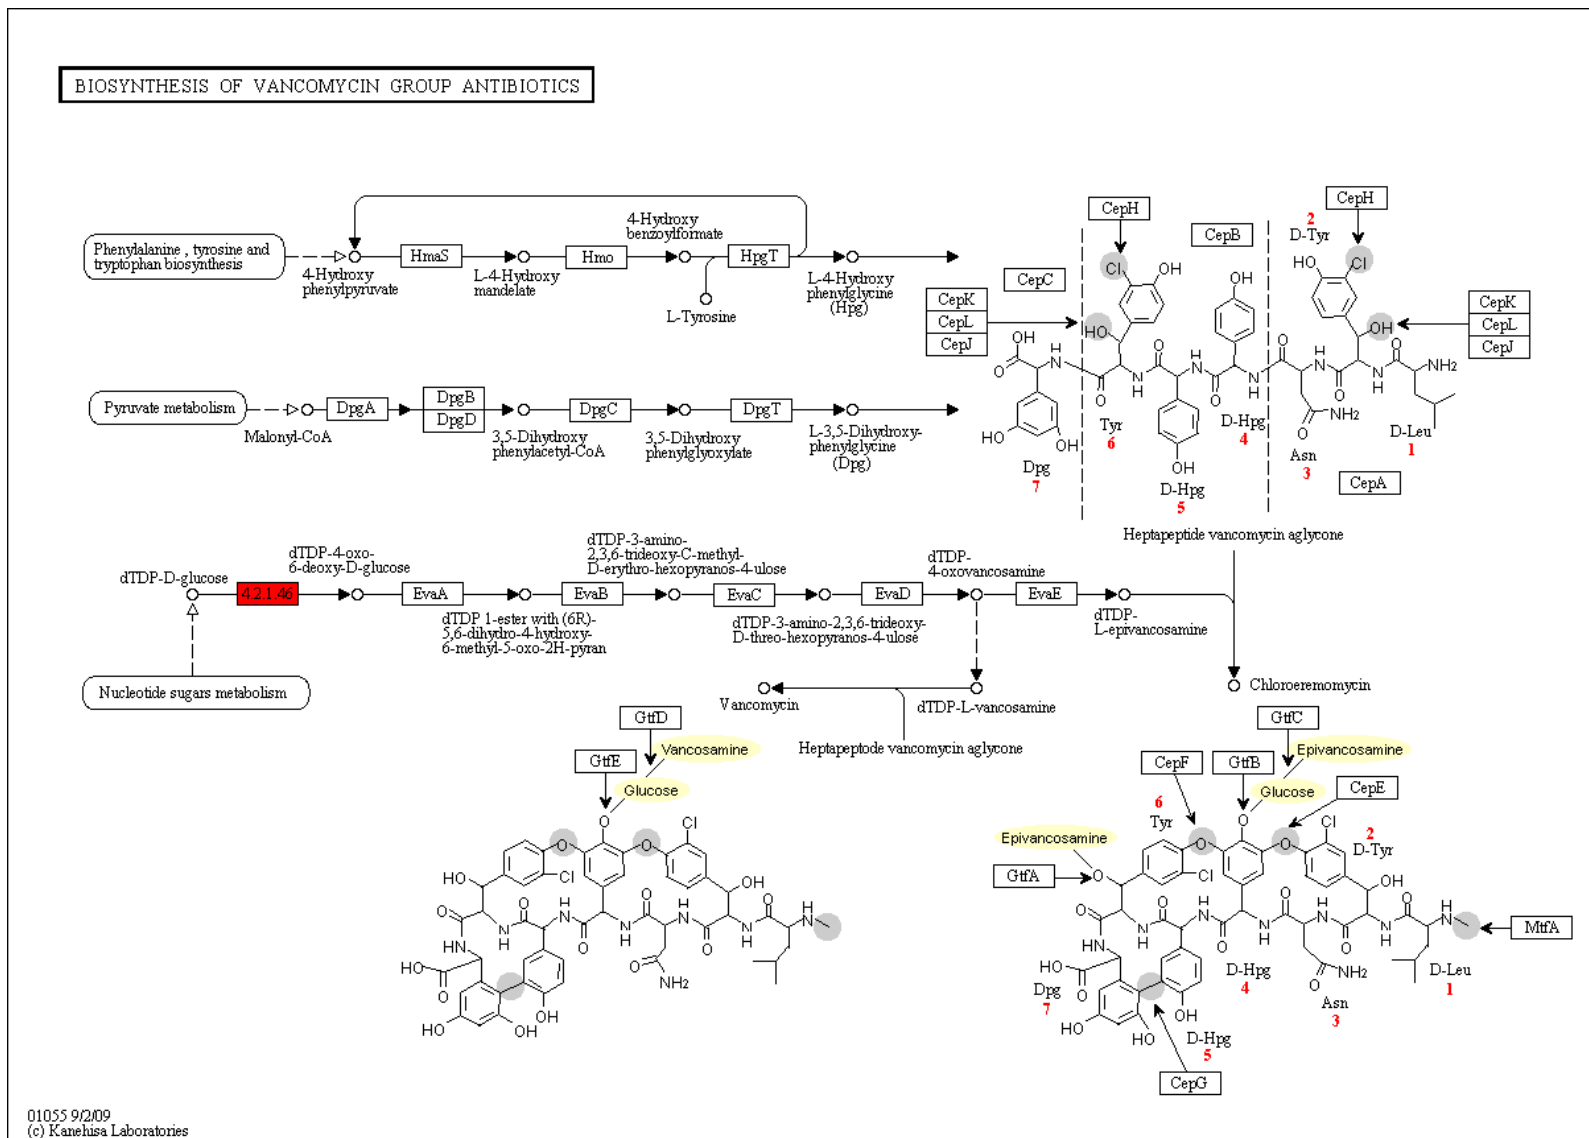

Figure 247: ko01055 Biosynthesis of vancomycin group antibiotics



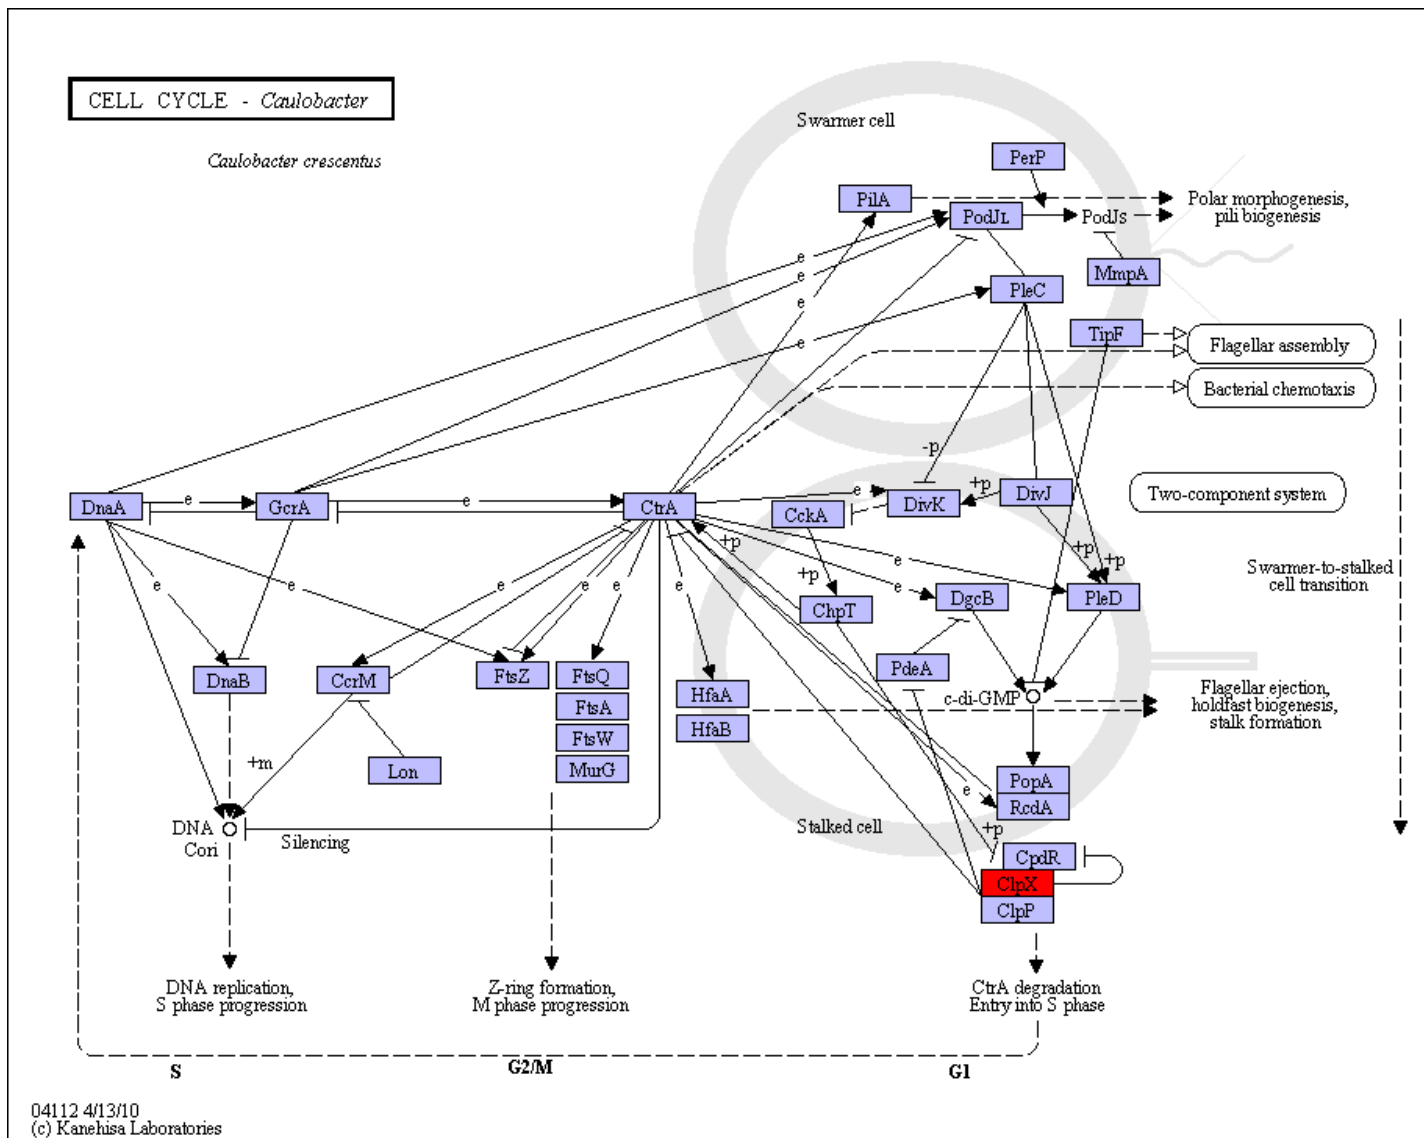

Figure 248: ko04112 Cell cycle - *Caulobacter*

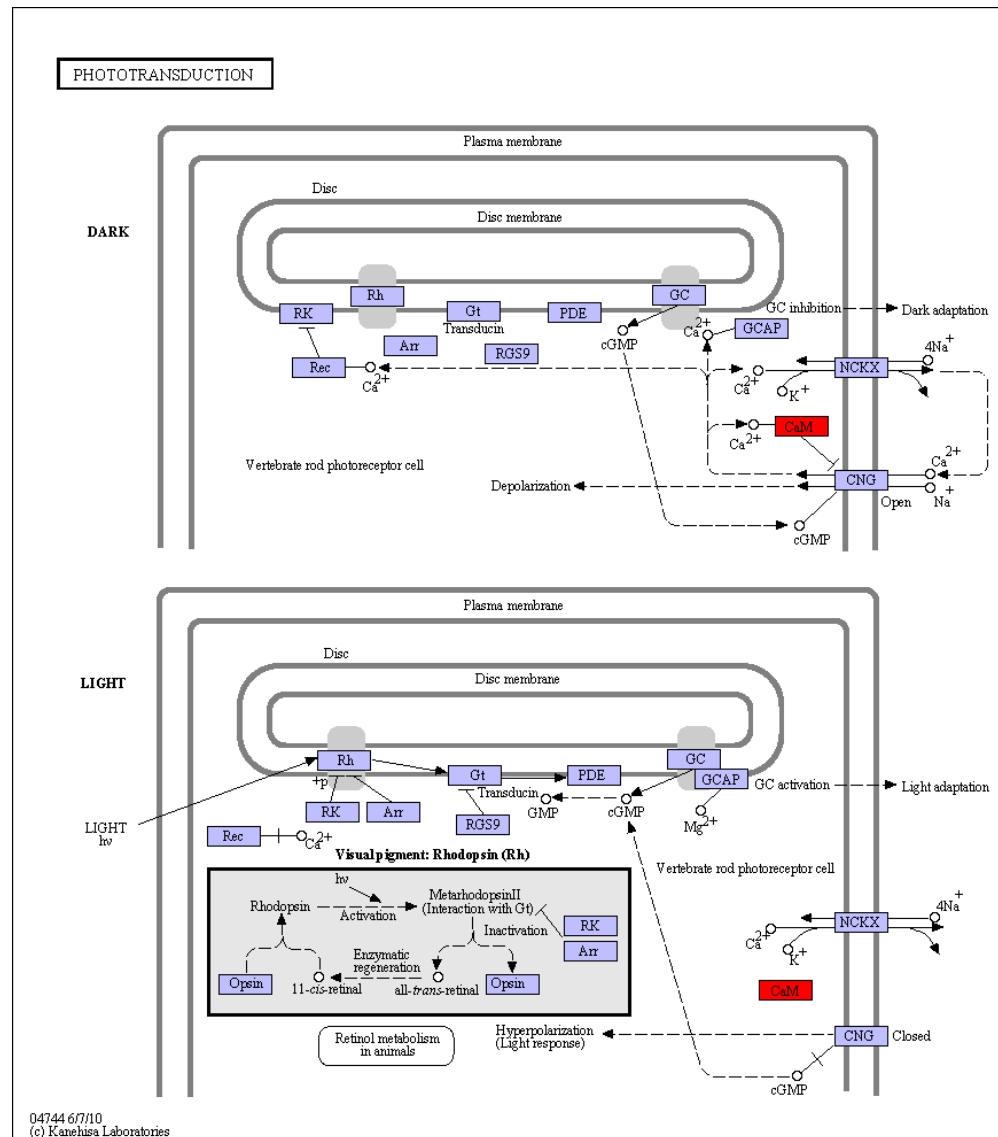

Figure 249: ko04744 Phototransduction

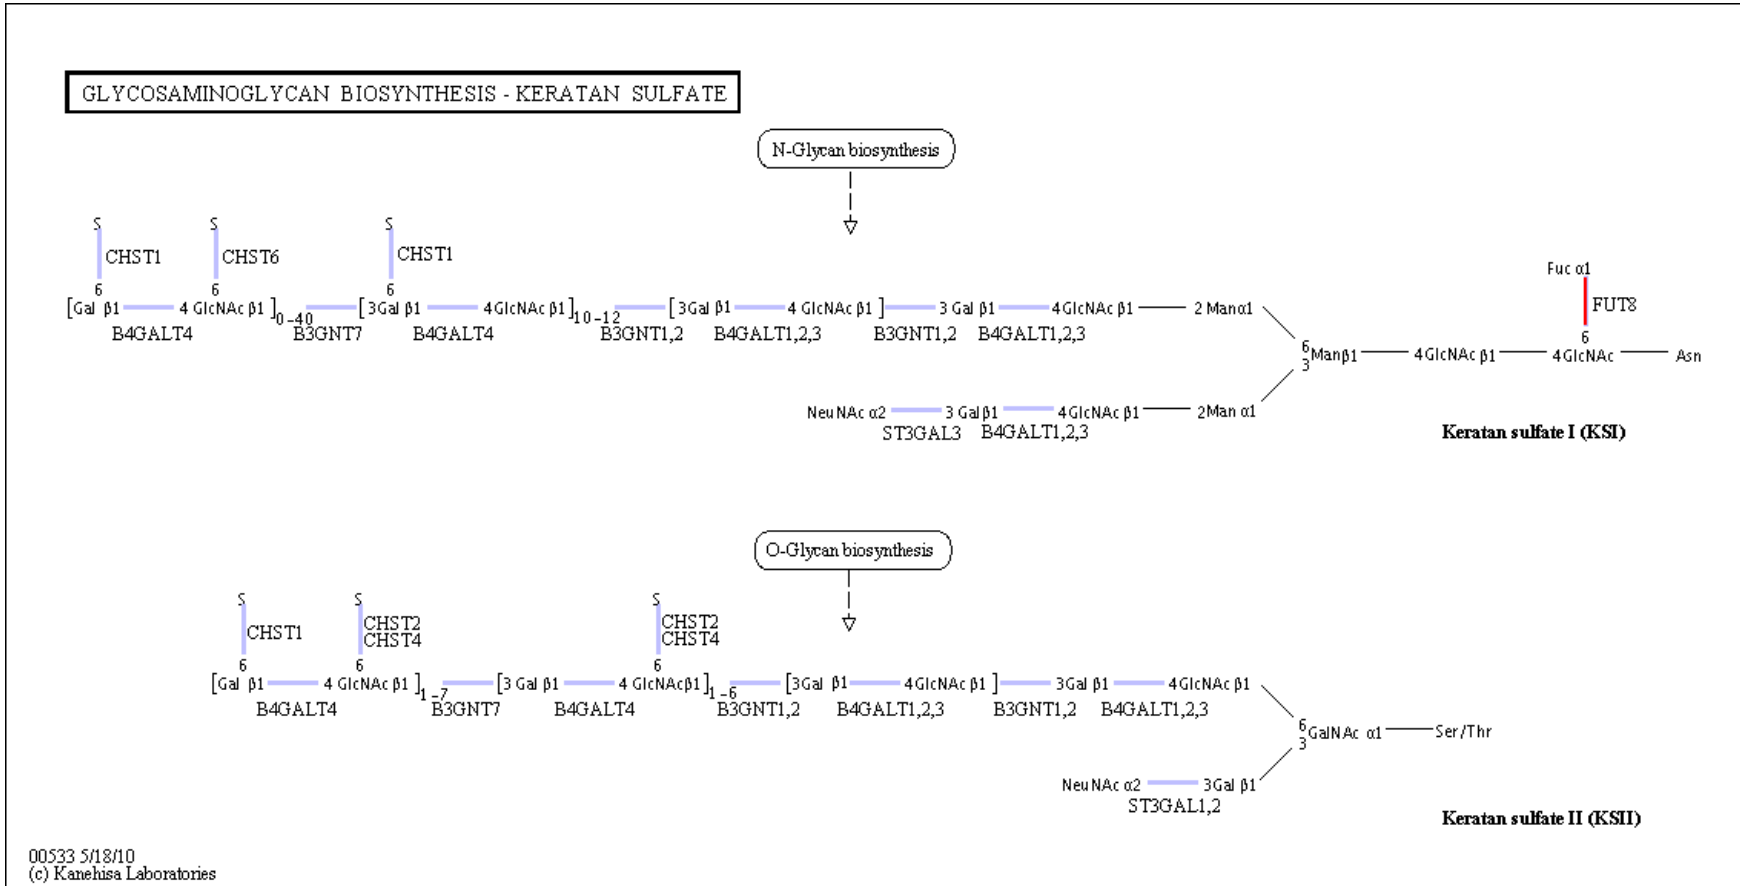

Figure 250: ko00533 Glycosaminoglycan biosynthesis - keratan sulfate

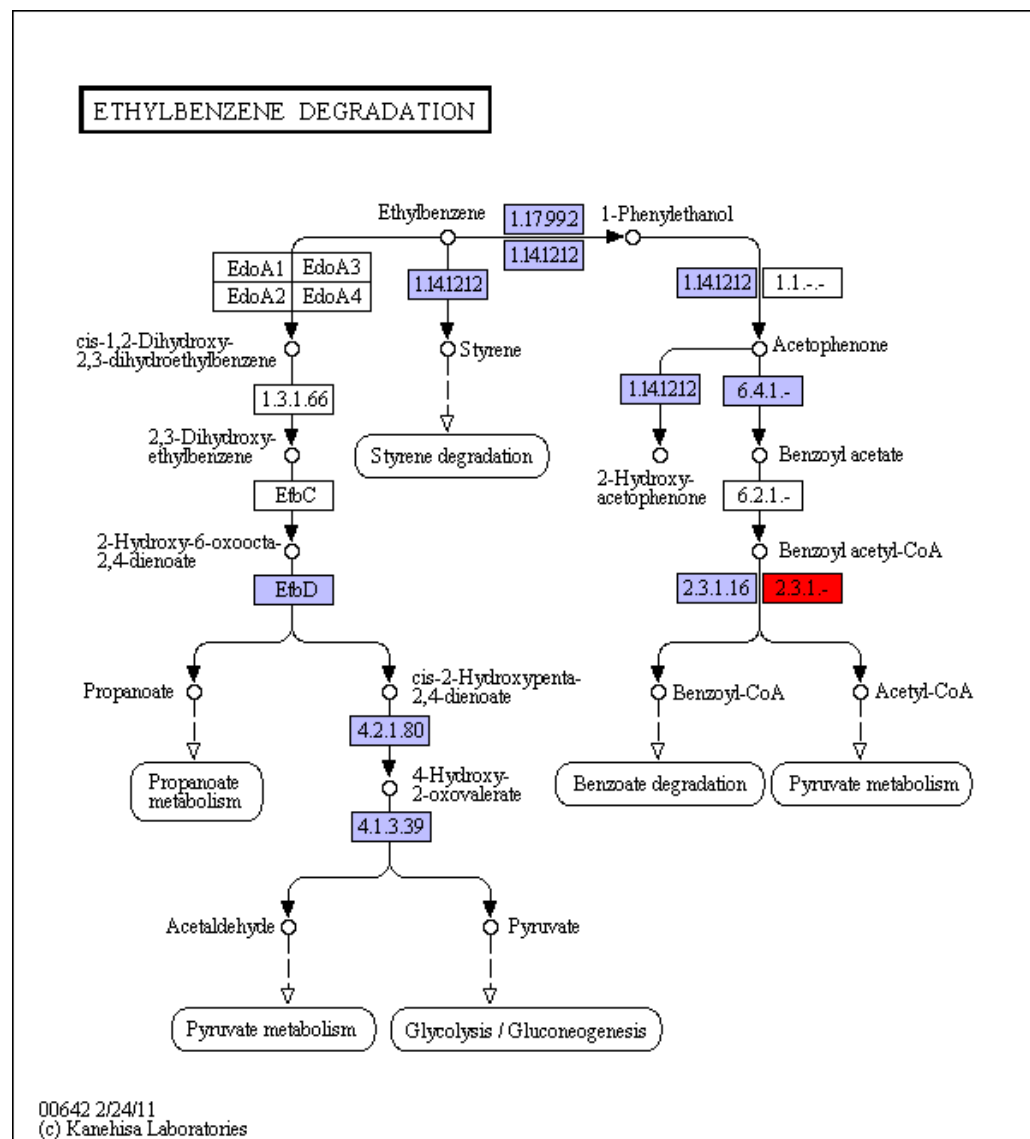

Figure 251: ko00642 Ethylbenzene degradation





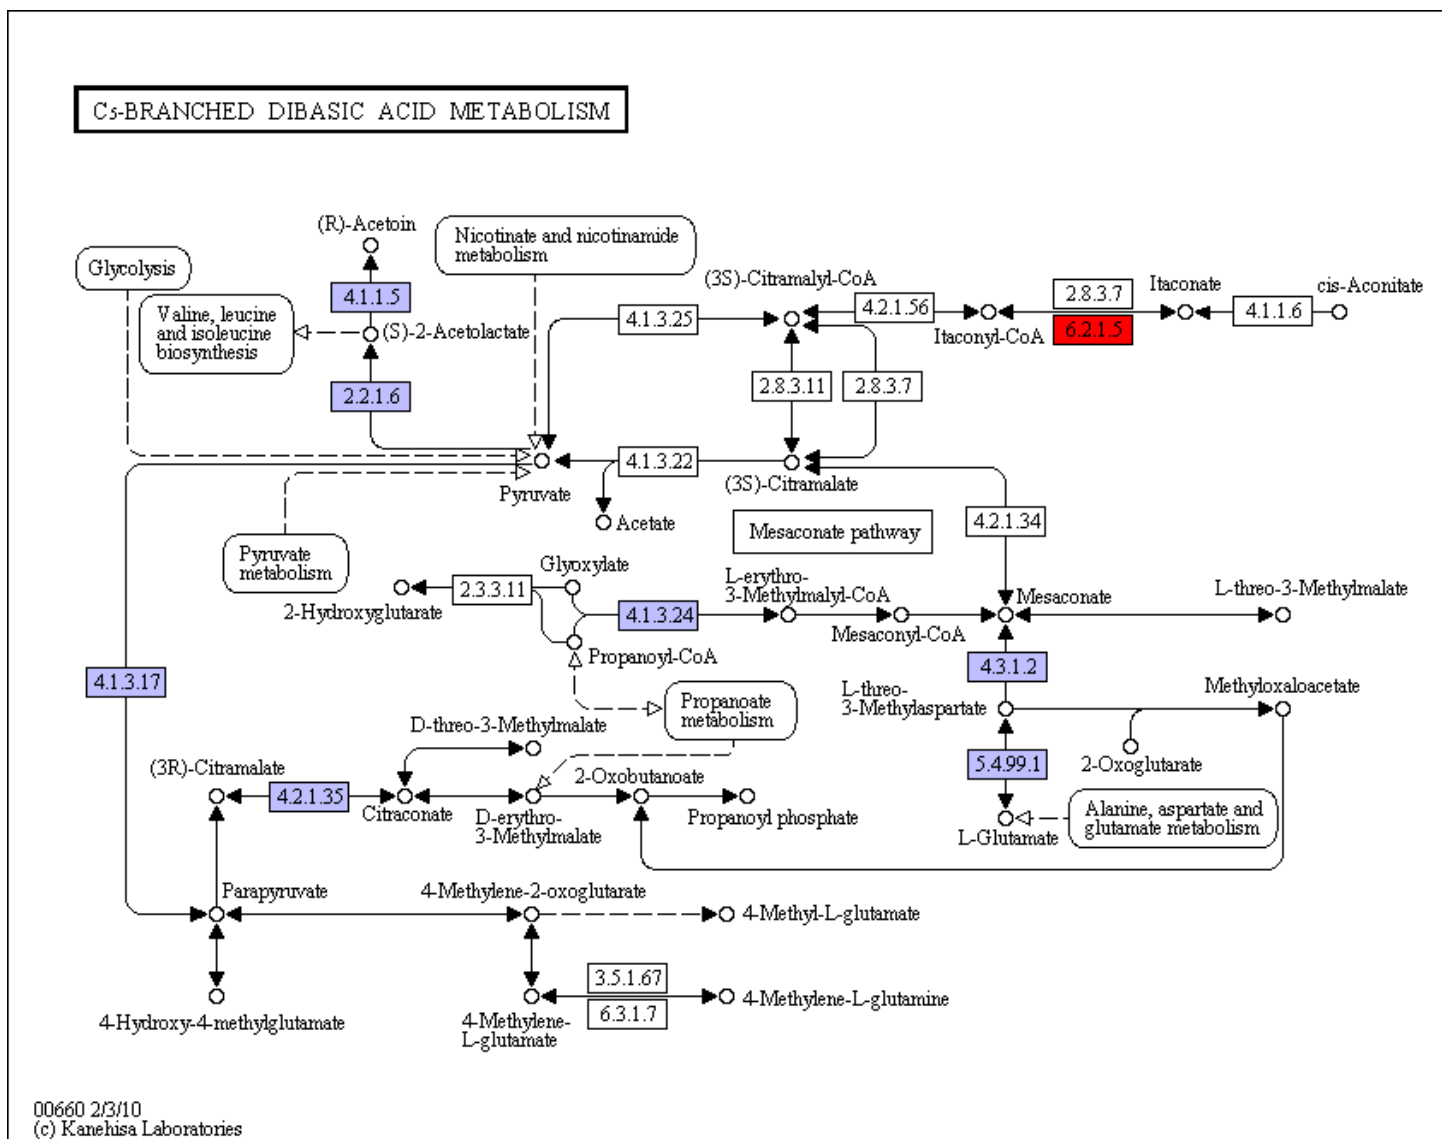

Figure 254: ko00660 C5-Branched dibasic acid metabolism

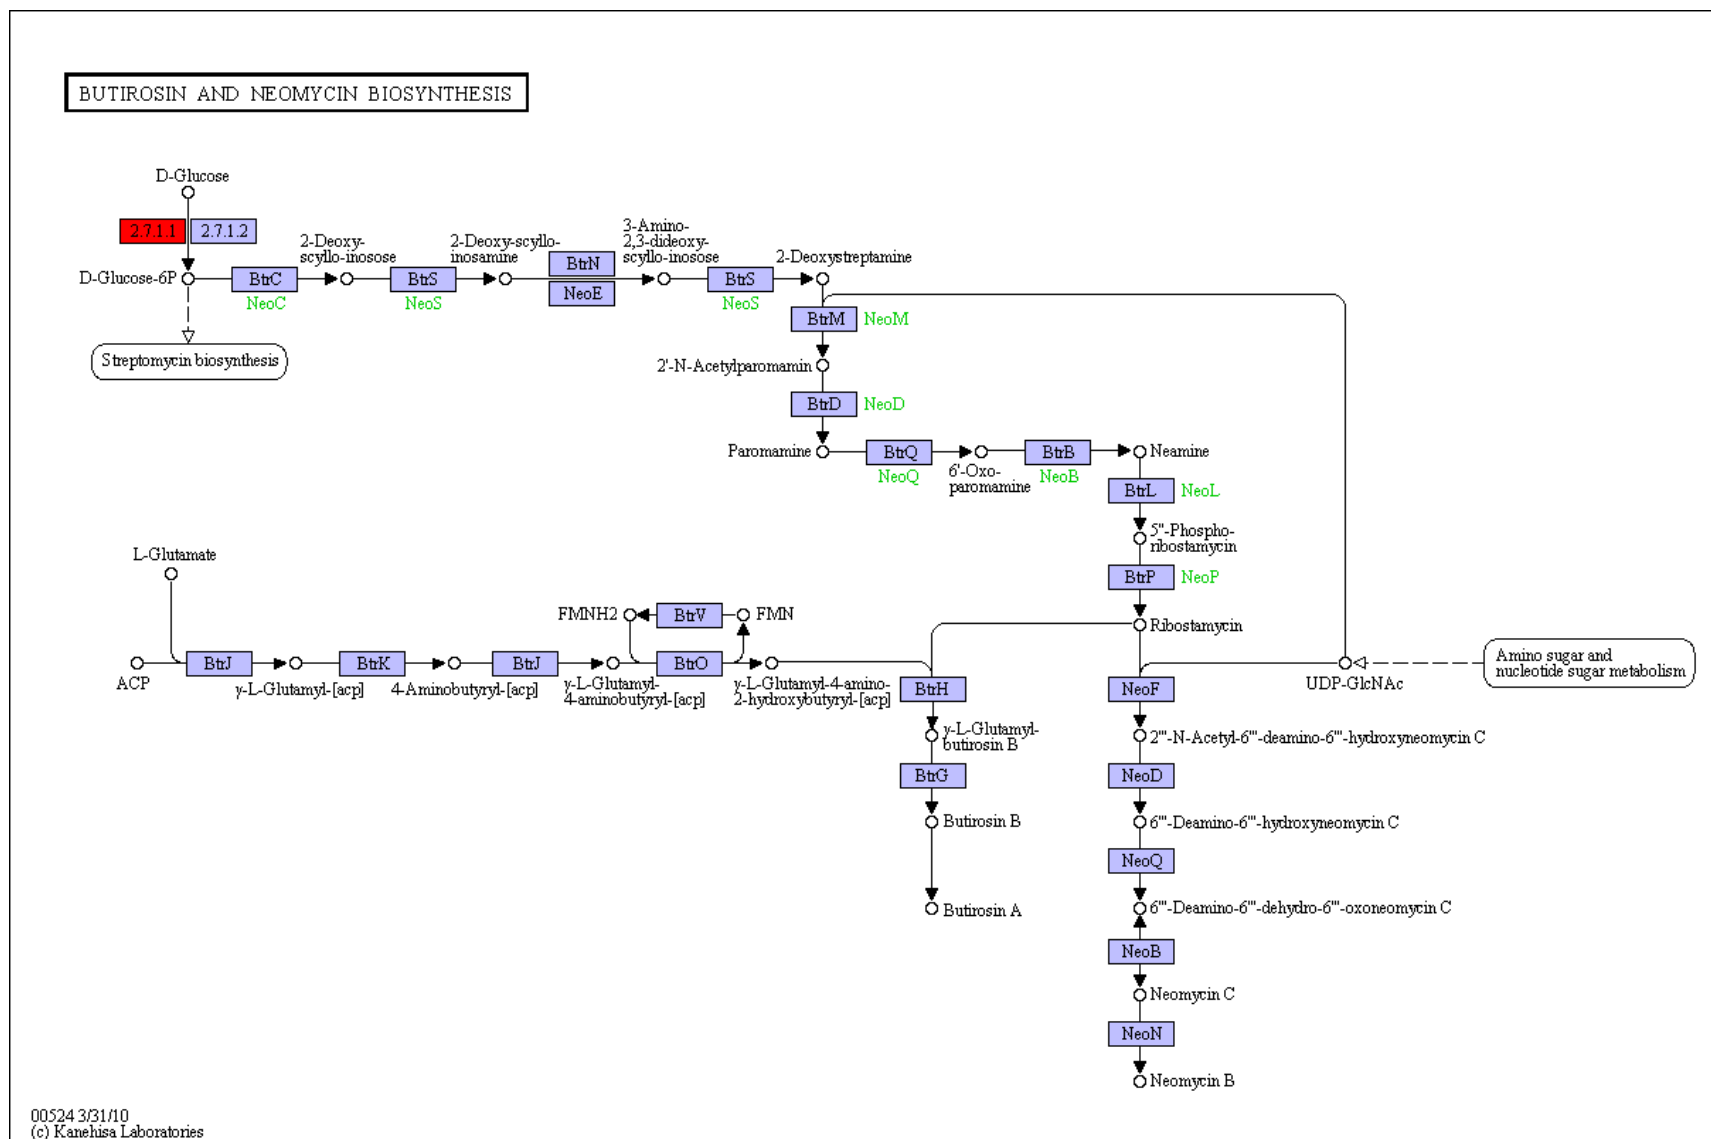

Figure 255: ko00524 Butirosin and neomycin biosynthesis



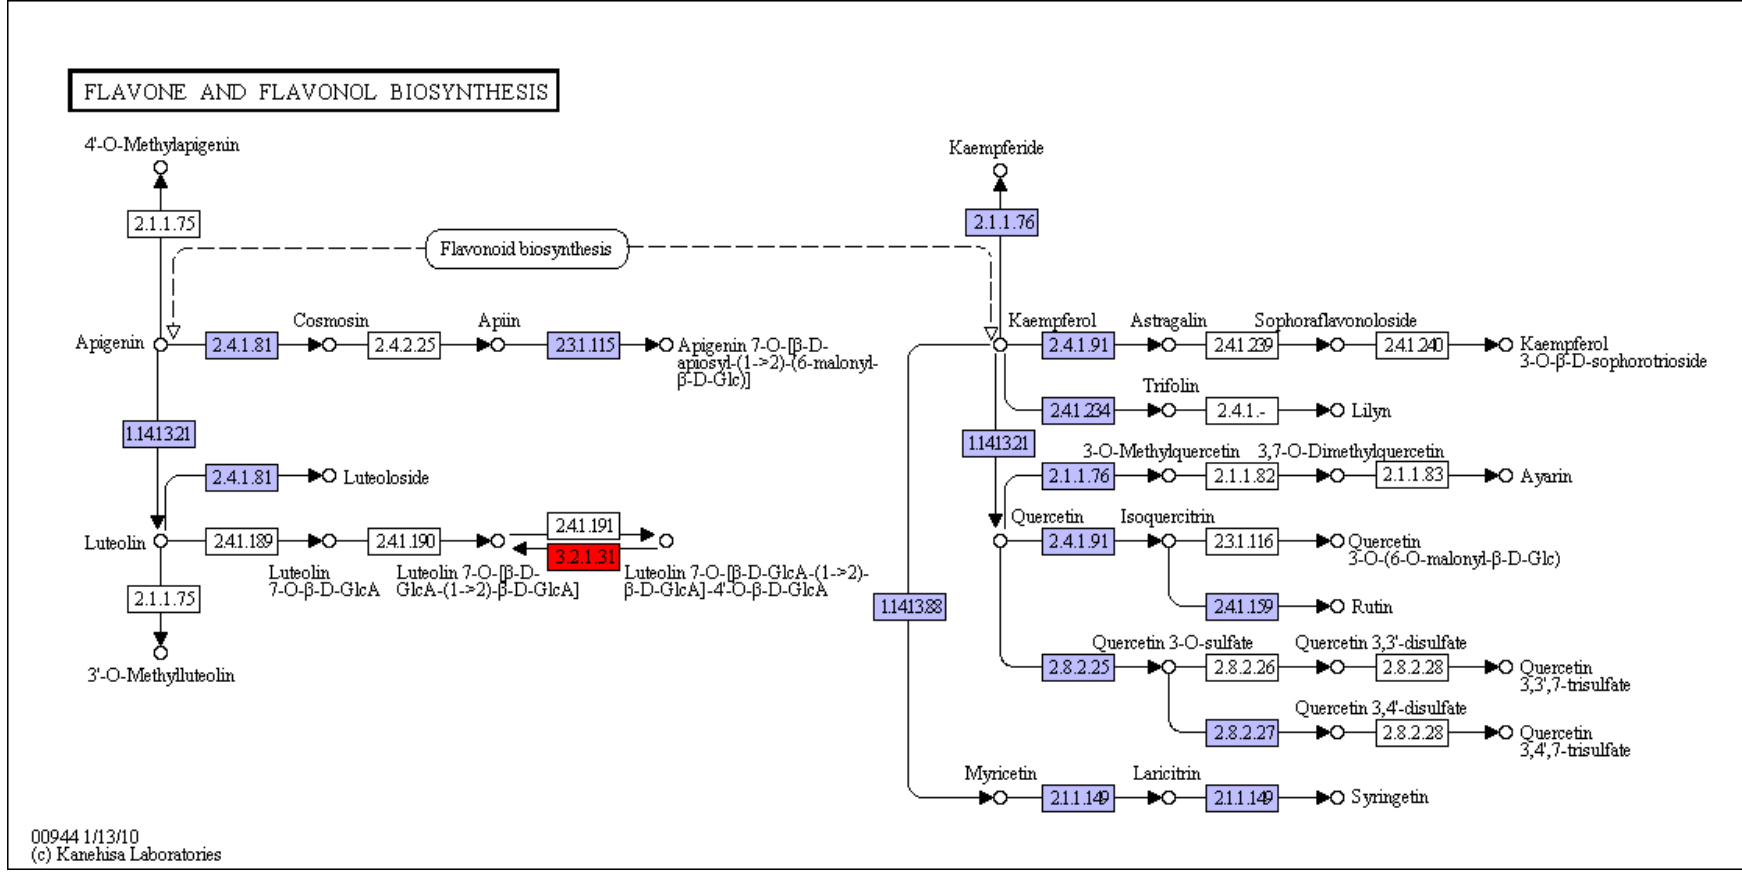

Figure 256: ko00944 Flavone and flavonol biosynthesis

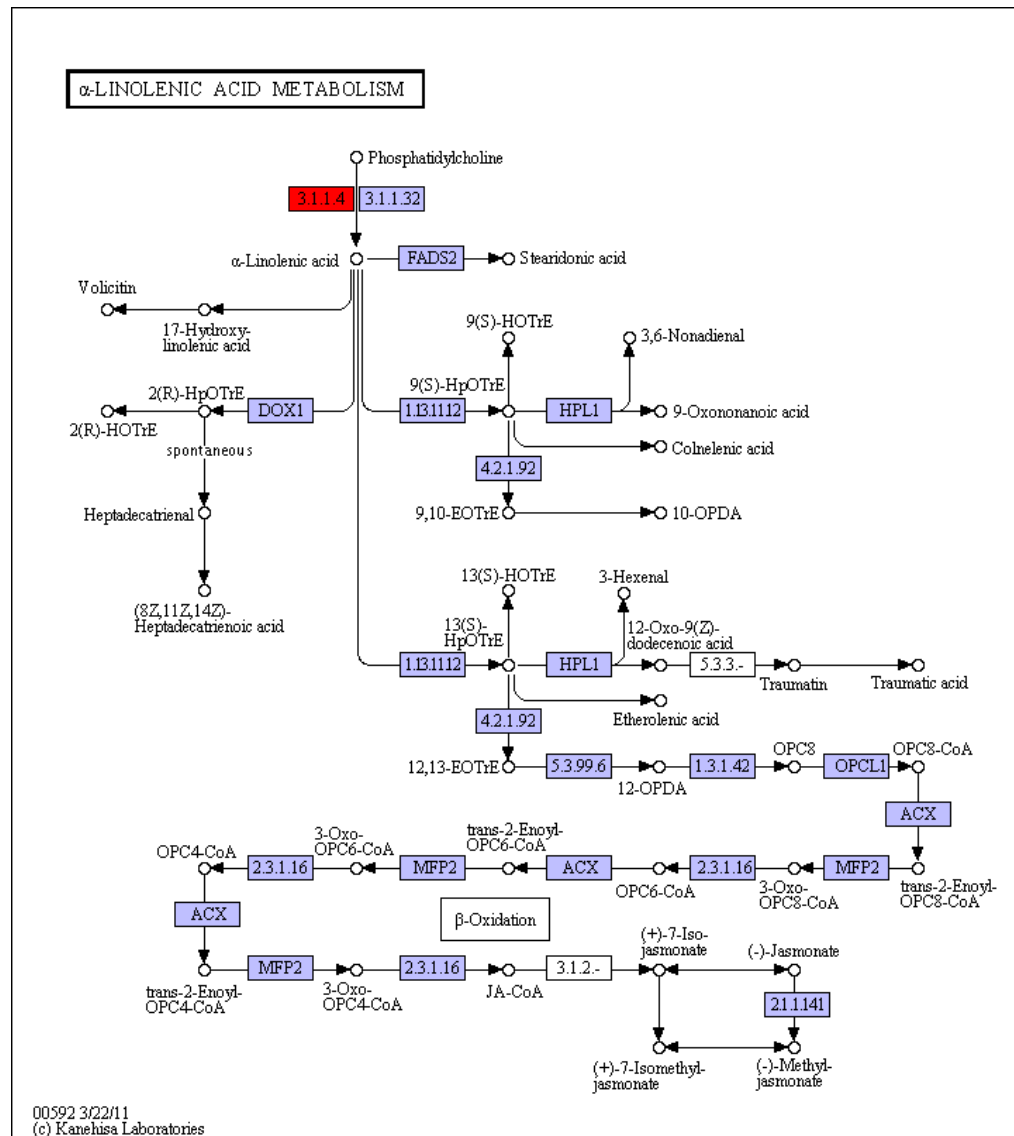

Figure 257: ko00592 alpha-Linolenic acid metabolism









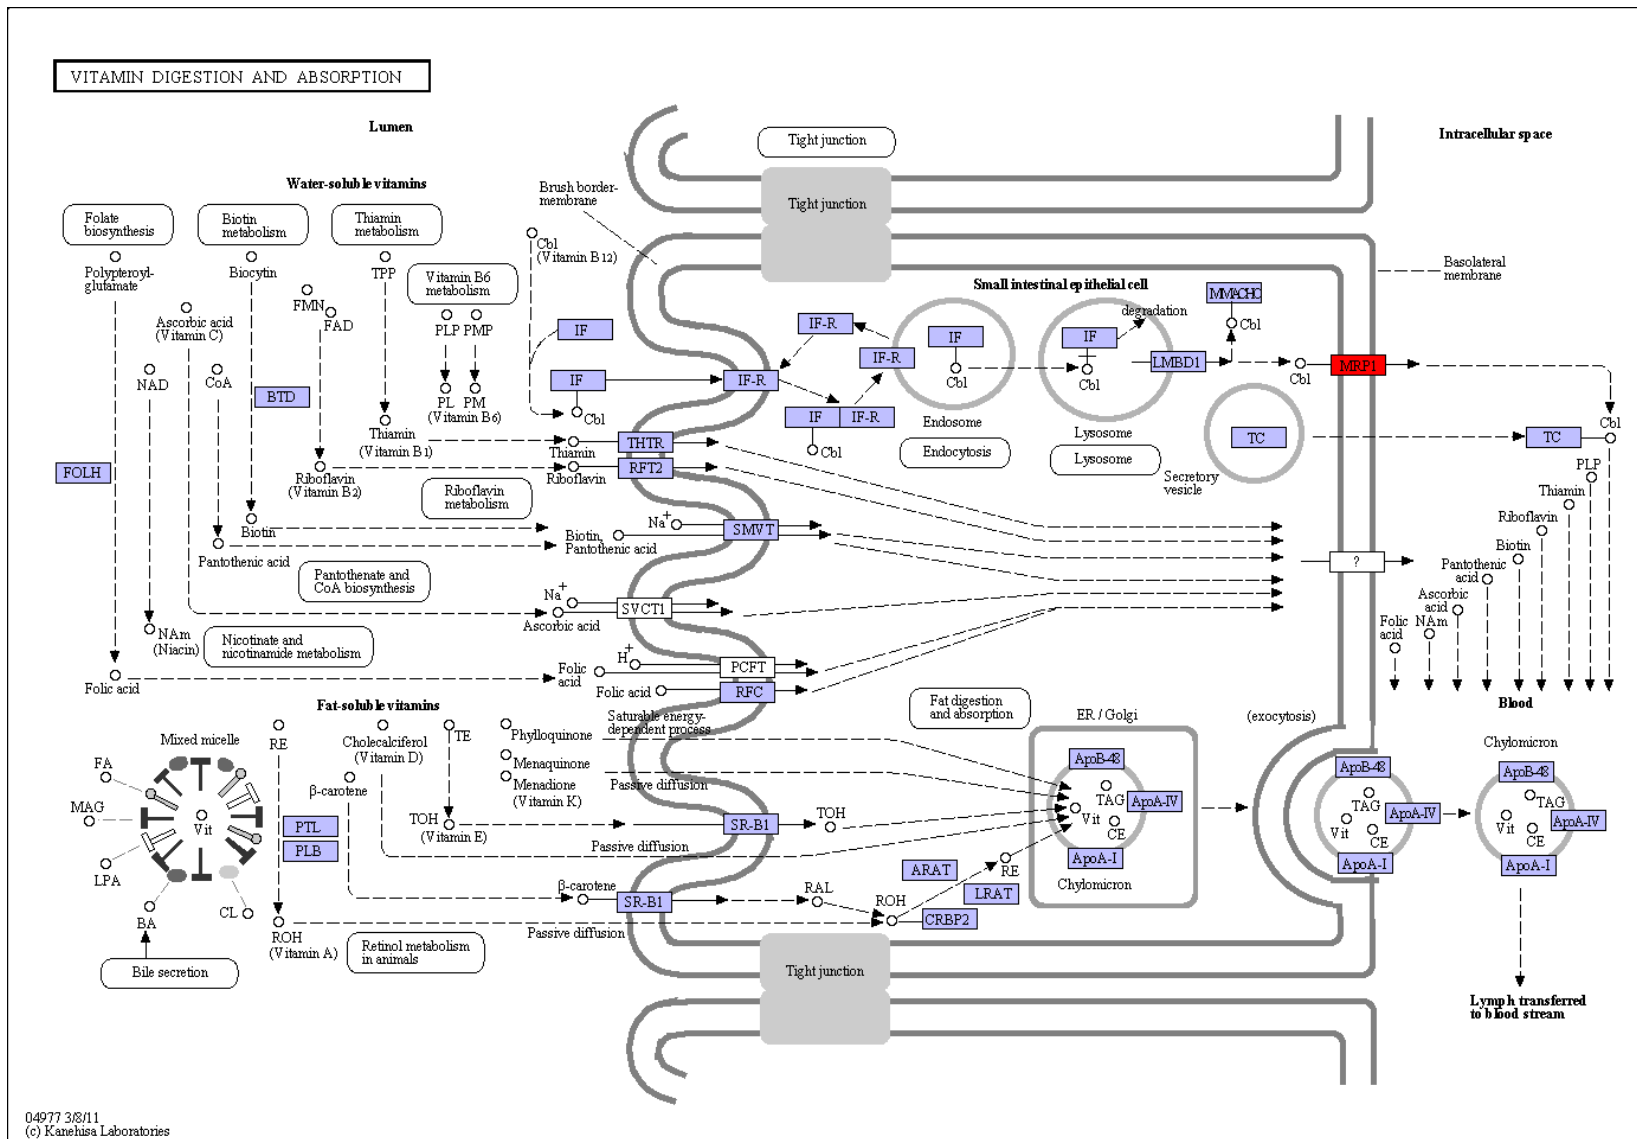

Figure 262: ko04977 Vitamin digestion and absorption
